# Supplementary material
Source: Research Square preprint supplement (doi:10.21203/rs.3.rs-10083601/v1)
Supplement: Supplementary file 1 [file 8321f53c16d7b8d1ebc763d4.xlsx]

## Sheet: CRYPTO_MONTHLY_PANEL
asset	type	year	month	month_end	open	close	min	max	mean	median	amplitude	n_obs	n_gaps	vol_daily	vol_month	vol_ann	downside_vol_month	mdd_intramonth	mdd_cumulative	volume_min	volume_mean	volume_max	mcap_min	mcap_mean	mcap_max	n_outlier_days	n_divergence_days	return_m	logreturn_m	sharpe_m_rf0	sortino_m_rf0	calmar_36m
1inch	crypto	2020	12	2020-12-31	1.61933	1.36524	0.89379	1.61933	1.19278	1.10299	0.725538	6	0	0.273654	0.611909	5.22815	0.46341	0.448049	0.448049	5.98968e+07	9.37006e+07	1.50292e+08	1.34069e+09	1.78917e+09	2.42899e+09	0	0
1inch	crypto	2021	1	2021-01-31	1.15021	4.99492	1.02809	4.99492	1.90221	1.58421	3.96683	31	0	0.129326	0.720054	2.47076	0.353527	0.251304	0.365113	1.66916e+07	7.51888e+07	5.29601e+08	1.54214e+09	2.85332e+09	7.49238e+09	0	0	2.65865	1.29709	1.80138	3.66901
1inch	crypto	2021	2	2021-02-28	5.03531	3.8704	3.61118	5.82667	4.86934	4.96414	2.21549	28	0	0.0862132	0.456197	1.6471	0.340221	0.380232	0.380232	1.06274e+08	2.04206e+08	4.74602e+08	5.41677e+09	7.30402e+09	8.74001e+09	0	0	-0.225134	-0.255065	-0.559111	-0.749704
1inch	crypto	2021	3	2021-03-31	4.0961	4.32309	3.68	4.97392	4.19461	4.0961	1.29392	31	0	0.0630648	0.35113	1.20485	0.222481	0.260141	0.368422	4.52771e+07	9.67923e+07	1.8492e+08	5.52e+09	6.29191e+09	7.46088e+09	0	0	0.116962	0.110612	0.315019	0.497176
1inch	crypto	2021	4	2021-04-30	4.47311	5.65348	3.97456	6.40555	5.21762	5.28599	2.43099	30	0	0.076172	0.417211	1.45526	0.276081	0.379514	0.379514	4.78833e+07	1.66668e+08	4.34767e+08	5.96184e+09	7.82643e+09	9.60833e+09	0	0	0.307741	0.268301	0.643082	0.971822
1inch	crypto	2021	5	2021-05-31	5.50448	3.19417	2.3501	7.41416	4.66848	5.25182	5.06405	31	0	0.131154	0.730232	2.50569	0.597789	0.683025	0.683025	5.45684e+07	1.72955e+08	6.75695e+08	3.52516e+09	7.00272e+09	1.11212e+10	0	0	-0.435008	-0.570943	-0.781866	-0.955092
1inch	crypto	2021	6	2021-06-30	3.10724	2.52389	2.32426	3.85985	3.03662	3.07119	1.53559	30	0	0.0889514	0.487207	1.69941	0.370351	0.397836	0.68651	3.05235e+07	7.96432e+07	2.53211e+08	3.48639e+09	4.55492e+09	5.78977e+09	0	0	-0.209844	-0.235525	-0.483419	-0.635951
1inch	crypto	2021	7	2021-07-31	2.38026	2.40017	1.71168	2.82358	2.26354	2.29155	1.1119	31	0	0.054559	0.303772	1.04235	0.215863	0.39379	0.769134	1.42593e+07	4.06882e+07	1.28773e+08	2.56752e+09	3.39531e+09	4.23536e+09	0	0	-0.0490211	-0.0502634	-0.165464	-0.232848
1inch	crypto	2021	8	2021-08-31	2.3334	3.05659	2.22702	3.44372	2.93816	3.04816	1.2167	31	0	0.0501941	0.279469	0.958958	0.172174	0.141813	0.699626	3.98119e+07	8.82611e+07	1.6514e+08	3.34053e+09	4.40723e+09	5.16557e+09	0	0	0.273491	0.241762	0.865077	1.40417
1inch	crypto	2021	9	2021-09-30	3.34223	2.54414	2.3122	3.84185	2.95925	2.92889	1.52965	30	0	0.0756452	0.414326	1.4452	0.339324	0.398154	0.688137	3.66101e+07	8.10927e+07	1.82229e+08	3.46831e+09	4.43888e+09	5.76278e+09	0	0	-0.167654	-0.183507	-0.442905	-0.540802
1inch	crypto	2021	10	2021-10-31	2.90876	4.57562	2.88601	5.6229	3.66162	3.34828	2.73689	31	0	0.0843542	0.469664	1.61158	0.16694	0.186253	0.610744	3.39805e+07	2.89727e+08	4.74319e+09	4.32901e+09	5.49244e+09	8.43434e+09	0	0	0.79849	0.586947	1.24972	3.51591
1inch	crypto	2021	11	2021-11-30	4.57833	3.56107	3.54353	4.62224	4.11435	4.11171	1.07871	30	0	0.0511765	0.280305	0.977726	0.235503	0.233374	0.522059	5.98784e+07	1.09385e+08	1.99366e+08	5.31529e+09	6.17152e+09	6.93336e+09	0	0	-0.221728	-0.250679	-0.894308	-1.06444
1inch	crypto	2021	12	2021-12-31	3.69214	2.39139	2.39139	3.69214	2.65431	2.56273	1.30075	31	0	0.0520575	0.289844	0.994557	0.258038	0.352304	0.677457	3.47072e+07	1.16503e+08	6.07568e+08	3.58708e+09	3.98146e+09	5.53821e+09	0	0	-0.328465	-0.398189	-1.37381	-1.54314
1inch	crypto	2022	1	2022-01-31	2.51355	1.6847	1.57718	2.56589	2.06679	2.14248	0.98871	31	0	0.047667	0.265399	0.910677	0.23941	0.385328	0.787274	3.0049e+07	7.0674e+07	3.23135e+08	2.36578e+09	3.10018e+09	3.84884e+09	0	0	-0.295512	-0.350284	-1.31984	-1.46312
1inch	crypto	2022	2	2022-02-28	1.71145	1.49854	1.33241	1.93974	1.63945	1.66119	0.607321	28	0	0.0493678	0.26123	0.94317	0.191363	0.313095	0.820288	2.17905e+07	4.24865e+07	6.74129e+07	1.99862e+09	2.45918e+09	2.9096e+09	0	0	-0.110499	-0.117094	-0.448243	-0.611897
1inch	crypto	2022	3	2022-03-31	1.5158	1.77636	1.27689	1.8481	1.50414	1.5105	0.571206	31	0	0.0402839	0.224291	0.769623	0.127347	0.157614	0.827777	1.85673e+07	5.16269e+07	1.29916e+08	1.91533e+09	2.25621e+09	2.77214e+09	0	0	0.185391	0.170073	0.758267	1.33551
1inch	crypto	2022	4	2022-04-30	1.87721	1.11663	1.11663	1.97328	1.54267	1.51441	0.856655	30	0	0.0476942	0.261232	0.911197	0.247393	0.434126	0.849392	1.04645e+07	3.82284e+07	1.45283e+08	1.67494e+09	2.314e+09	2.95993e+09	0	0	-0.371395	-0.464252	-1.77716	-1.87657
1inch	crypto	2022	5	2022-05-31	1.15671	0.96931	0.806812	1.35437	1.02908	0.96931	0.547559	31	0	0.0751192	0.418246	1.43515	0.347216	0.40429	0.891179	9.21195e+06	4.48646e+07	1.67174e+08	1.21022e+09	1.54362e+09	2.03156e+09	0	0	-0.131932	-0.141486	-0.338283	-0.407486
1inch	crypto	2022	6	2022-06-30	0.954462	0.678533	0.550297	0.954462	0.725828	0.699744	0.404165	30	0	0.0584126	0.319939	1.11597	0.232233	0.423448	0.925778	1.3466e+07	4.10542e+07	1.62519e+08	8.25445e+08	1.08874e+09	1.43169e+09	0	0	-0.299984	-0.356651	-1.11475	-1.53575
1inch	crypto	2022	7	2022-07-31	0.655087	0.762172	0.566488	0.771468	0.666836	0.655117	0.20498	31	0	0.0503515	0.280345	0.961964	0.173945	0.183556	0.923594	9.26769e+06	3.1141e+07	8.37603e+07	8.49733e+08	1.00025e+09	1.1572e+09	0	0	0.123264	0.116239	0.414626	0.668247
1inch	crypto	2022	8	2022-08-31	0.770914	0.664562	0.636997	0.880129	0.759258	0.766936	0.243132	31	0	0.0419984	0.233837	0.802378	0.183801	0.276246	0.914084	7.36921e+06	1.95381e+07	3.80305e+07	9.55495e+08	1.13889e+09	1.32019e+09	0	0	-0.128068	-0.137044	-0.586068	-0.745611
1inch	crypto	2022	9	2022-09-30	0.668013	0.576151	0.562805	0.711535	0.621693	0.611416	0.14873	30	0	0.0409645	0.224372	0.782626	0.182343	0.209027	0.92409	1.20815e+07	2.62158e+07	7.10782e+07	8.44208e+08	9.32539e+08	1.0673e+09	0	0	-0.133036	-0.142758	-0.636256	-0.782908
1inch	crypto	2022	10	2022-10-31	0.574547	0.612277	0.555281	0.622971	0.582156	0.574547	0.0676906	31	0	0.0239553	0.133378	0.457666	0.0814277	0.0858367	0.925105	5.71291e+06	2.0828e+07	1.5631e+08	8.32921e+08	8.73235e+08	9.34457e+08	0	0	0.0627025	0.0608152	0.455963	0.746861
1inch	crypto	2022	11	2022-11-30	0.607771	0.526698	0.502454	0.649801	0.548828	0.526543	0.147347	30	0	0.043859	0.240226	0.837925	0.193709	0.226757	0.93223	5.04004e+06	2.31433e+07	7.9489e+07	7.53682e+08	8.23242e+08	9.74702e+08	0	0	-0.139772	-0.150558	-0.626736	-0.777239
1inch	crypto	2022	12	2022-12-31	0.50896	0.383509	0.376261	0.50896	0.424452	0.40542	0.132699	31	0	0.0287126	0.159865	0.548553	0.15155	0.260726	0.949251	2.59639e+06	9.02482e+06	2.39581e+07	5.64392e+08	6.36678e+08	7.63441e+08	0	0	-0.271862	-0.317264	-1.98458	-2.09346
1inch	crypto	2023	1	2023-01-31	0.385901	0.513782	0.385901	0.540562	0.46591	0.480487	0.154661	31	0	0.0313189	0.174376	0.598347	0.114654	0.10354	0.947951	4.08387e+06	2.15651e+07	7.55142e+07	5.78851e+08	6.98866e+08	8.10843e+08	0	0	0.339687	0.292436	1.67704	2.5506
1inch	crypto	2023	2	2023-02-28	0.527008	0.571554	0.526111	0.688143	0.570888	0.566585	0.162032	28	0	0.0421745	0.223167	0.805743	0.136366	0.169426	0.92904	5.84088e+06	3.20383e+07	1.64434e+08	7.89167e+08	8.56332e+08	1.03221e+09	0	0	0.112445	0.10656	0.477491	0.781428
1inch	crypto	2023	3	2023-03-31	0.586632	0.558987	0.437823	0.586632	0.512117	0.513657	0.148809	31	0	0.0475166	0.264561	0.907803	0.185283	0.253667	0.940948	6.47053e+06	2.35801e+07	1.88329e+08	6.56734e+08	7.68176e+08	8.79948e+08	0	0	-0.0219874	-0.0222327	-0.0840363	-0.119993
1inch	crypto	2023	4	2023-04-30	0.54001	0.473121	0.473121	0.57481	0.523651	0.52901	0.101689	30	0	0.0307206	0.168264	0.586916	0.147372	0.176909	0.936187	5.65462e+06	1.38388e+07	2.74515e+07	7.09681e+08	7.85476e+08	8.62215e+08	0	0	-0.15361	-0.166775	-0.991153	-1.13166
1inch	crypto	2023	5	2023-05-31	0.454542	0.380576	0.380576	0.464946	0.415296	0.409048	0.0843698	31	0	0.0254769	0.141849	0.486735	0.135887	0.181462	0.948669	2.82334e+06	7.14602e+06	1.50432e+07	5.70864e+08	6.22944e+08	6.97419e+08	0	0	-0.195605	-0.217665	-1.53448	-1.6018
1inch	crypto	2023	6	2023-06-30	0.368903	0.317185	0.260083	0.381679	0.30876	0.311834	0.121595	30	0	0.0491746	0.26934	0.939479	0.235013	0.31858	0.964921	4.46305e+06	1.05619e+07	3.38186e+07	3.90125e+08	4.6314e+08	5.72518e+08	0	0	-0.166565	-0.1822	-0.676466	-0.775276
1inch	crypto	2023	7	2023-07-31	0.330954	0.314371	0.302793	0.433453	0.328137	0.324274	0.13066	31	0	0.0536822	0.29889	1.0256	0.191845	0.30144	0.95916	3.68636e+06	4.67368e+07	6.4004e+08	4.54189e+08	4.92206e+08	6.5018e+08	0	0	-0.00887175	-0.00891134	-0.0298148	-0.0464507
1inch	crypto	2023	8	2023-08-31	0.31932	0.244882	0.236664	0.31932	0.276788	0.264167	0.0826565	31	0	0.0327103	0.182123	0.62493	0.171764	0.258852	0.968079	5.75813e+06	1.04095e+07	2.1705e+07	3.54996e+08	4.15182e+08	4.7898e+08	0	0	-0.221042	-0.249798	-1.37159	-1.45431
1inch	crypto	2023	9	2023-09-30	0.235043	0.270171	0.223698	0.270171	0.249556	0.248549	0.0464732	30	0	0.0259618	0.142199	0.496	0.099075	0.0971849	0.969828	4.69151e+06	1.05728e+07	5.05101e+07	3.35546e+08	3.74334e+08	4.05256e+08	0	0	0.103268	0.0982768	0.691123	0.991944
1inch	crypto	2023	10	2023-10-31	0.276943	0.292488	0.239512	0.297096	0.263063	0.25704	0.0575841	31	0	0.0235999	0.131399	0.450876	0.087116	0.135157	0.967695	4.19642e+06	1.39769e+07	7.04774e+07	3.59269e+08	3.94595e+08	4.45645e+08	0	0	0.0826061	0.0793712	0.604048	0.911097
1inch	crypto	2023	11	2023-11-30	0.312965	0.341541	0.30854	0.3842	0.350885	0.354762	0.0756606	30	0	0.041329	0.226368	0.78959	0.139209	0.150939	0.958385	8.86128e+06	2.88238e+07	1.1771e+08	4.6281e+08	5.26328e+08	5.763e+08	0	0	0.167708	0.155043	0.684914	1.11374
1inch	crypto	2023	12	2023-12-31	0.348841	0.42566	0.348841	0.454409	0.391967	0.382352	0.105568	31	0	0.0354899	0.197599	0.678033	0.130838	0.135792	0.952949	1.385e+07	2.5615e+07	5.67229e+07	5.23261e+08	5.8795e+08	6.81614e+08	0	0	0.246291	0.220172	1.11423	1.68278	-0.336489
1inch	crypto	2024	1	2024-01-31	0.486383	0.391783	0.370949	0.518884	0.43357	0.424216	0.147935	31	0	0.0653349	0.363769	1.24822	0.25004	0.285103	0.949967	1.41046e+07	5.74611e+07	4.37472e+08	5.56423e+08	6.50355e+08	7.78326e+08	0	0	-0.0795871	-0.0829329	-0.227982	-0.331678	-0.597835
1inch	crypto	2024	2	2024-02-29	0.382279	0.509323	0.382279	0.509323	0.442155	0.441765	0.127045	29	0	0.0298163	0.160566	0.56964	0.0815971	0.0608085	0.948439	1.17619e+07	3.11415e+07	1.79654e+08	5.73418e+08	6.63233e+08	7.63985e+08	0	0	0.300016	0.262376	1.63407	3.21551	-0.513604
1inch	crypto	2024	3	2024-03-31	0.551355	0.617592	0.498437	0.682916	0.594043	0.590057	0.184479	31	0	0.0556821	0.310025	1.06381	0.2024	0.270135	0.932772	1.61925e+07	4.29183e+07	1.38391e+08	7.47655e+08	8.91064e+08	1.02437e+09	0	0	0.212573	0.192744	0.621705	0.952294	-0.498848
1inch	crypto	2024	4	2024-04-30	0.599823	0.393452	0.38111	0.611215	0.473686	0.439628	0.230105	30	0	0.0593824	0.325251	1.1345	0.293418	0.376472	0.948597	1.16755e+07	2.55371e+07	9.47029e+07	5.71665e+08	7.10528e+08	9.16823e+08	0	0	-0.362926	-0.450869	-1.38622	-1.53661	-0.615321
1inch	crypto	2024	5	2024-05-31	0.368618	0.482399	0.354546	0.506757	0.400947	0.387993	0.15221	31	0	0.0394967	0.219908	0.754584	0.127346	0.0938203	0.95218	8.45381e+06	2.56581e+07	1.38114e+08	5.31819e+08	6.0142e+08	7.60135e+08	0	0	0.226069	0.203813	0.926809	1.60047	-0.493896
1inch	crypto	2024	6	2024-06-30	0.483776	0.399698	0.383359	0.483776	0.425743	0.413701	0.100416	30	0	0.0359522	0.196918	0.686866	0.142561	0.207568	0.948294	8.95188e+06	2.08562e+07	5.45696e+07	5.75039e+08	6.38614e+08	7.25663e+08	0	0	-0.171437	-0.188062	-0.955028	-1.31917	-0.484924
1inch	crypto	2024	7	2024-07-31	0.390008	0.3403	0.3403	0.431927	0.393592	0.397648	0.0916275	31	0	0.0384703	0.214194	0.734975	0.165332	0.212136	0.954101	9.90812e+06	1.35275e+07	2.58872e+07	5.10449e+08	5.90388e+08	6.4789e+08	0	0	-0.148608	-0.160883	-0.75111	-0.973093	-0.505617
1inch	crypto	2024	8	2024-08-31	0.346076	0.238235	0.238235	0.346076	0.264731	0.260755	0.107841	31	0	0.04644	0.258567	0.887235	0.220947	0.31161	0.967867	8.9595e+06	1.41876e+07	3.36196e+07	3.57353e+08	3.97097e+08	5.19114e+08	0	0	-0.299924	-0.356567	-1.37901	-1.61381	-0.604305
1inch	crypto	2024	9	2024-09-30	0.225257	0.278317	0.22316	0.310921	0.265707	0.262741	0.0877611	30	0	0.0562329	0.308	1.07433	0.16948	0.141547	0.969901	1.0622e+07	2.23259e+07	1.09016e+08	3.3474e+08	3.9856e+08	4.66381e+08	0	0	0.168245	0.155502	0.504877	0.917528	-0.550395
1inch	crypto	2024	10	2024-10-31	0.256785	0.246138	0.246138	0.291144	0.261467	0.25995	0.0450056	31	0	0.037868	0.21084	0.723468	0.165732	0.154582	0.966802	5.39427e+06	1.03841e+07	2.08147e+07	3.69207e+08	3.922e+08	4.36715e+08	0	0	-0.115621	-0.12287	-0.582762	-0.741378	-0.656698
1inch	crypto	2024	11	2024-11-30	0.243483	0.445747	0.227448	0.445747	0.318389	0.306069	0.218299	30	0	0.0494534	0.270868	0.944807	0.122623	0.107718	0.969322	4.73404e+06	2.66954e+07	1.25693e+08	3.41172e+08	4.77584e+08	6.68621e+08	0	0	0.810965	0.59386	2.19244	4.84298	-0.535602
1inch	crypto	2024	12	2024-12-31	0.446156	0.38213	0.377717	0.621776	0.454629	0.446156	0.244059	31	0	0.0774544	0.431248	1.47976	0.338428	0.39252	0.949055	1.02099e+07	5.22847e+07	1.94087e+08	5.66575e+08	6.81944e+08	9.32664e+08	0	0	-0.142721	-0.153992	-0.357085	-0.455022	-0.507953
1inch	crypto	2025	1	2025-01-31	0.391952	0.310448	0.295327	0.435729	0.362277	0.374731	0.140402	31	0	0.0404784	0.225374	0.773339	0.194704	0.322223	0.960167	7.00991e+06	1.63076e+07	4.17433e+07	4.42991e+08	5.43415e+08	6.53593e+08	0	0	-0.187586	-0.207745	-0.921777	-1.06698	-0.497691
1inch	crypto	2025	2	2025-02-28	0.295117	0.240616	0.240616	0.295117	0.262806	0.264583	0.0545009	28	0	0.0356355	0.188565	0.680814	0.172361	0.184676	0.967546	6.6673e+06	1.51769e+07	7.12106e+07	3.60924e+08	3.94209e+08	4.42676e+08	0	0	-0.224938	-0.254812	-1.35132	-1.47837	-0.527179
1inch	crypto	2025	3	2025-03-31	0.242035	0.187541	0.187541	0.257764	0.211209	0.209255	0.0702237	31	0	0.0423966	0.236054	0.809986	0.211723	0.272434	0.974705	3.61411e+06	8.91615e+06	1.87433e+07	2.81311e+08	3.16814e+08	3.86646e+08	0	0	-0.220582	-0.249208	-1.05572	-1.17705	-0.589619
1inch	crypto	2025	4	2025-04-30	0.197112	0.206288	0.154198	0.206288	0.180448	0.176777	0.0520899	30	0	0.0447881	0.245314	0.855675	0.174638	0.217714	0.979202	3.39586e+06	8.57902e+06	1.71481e+07	2.31297e+08	2.70672e+08	3.09432e+08	0	0	0.0999634	0.0952769	0.388387	0.545567	-0.517355
1inch	crypto	2025	5	2025-05-31	0.208898	0.208658	0.18845	0.247184	0.221539	0.225957	0.0587334	31	0	0.0472846	0.263269	0.903371	0.180008	0.156662	0.974582	4.29219e+06	9.7357e+06	2.22708e+07	2.82676e+08	3.32309e+08	3.70776e+08	0	0	0.0114892	0.0114237	0.0433915	0.0634619	-0.496803
1inch	crypto	2025	6	2025-06-30	0.211682	0.177993	0.166353	0.226907	0.194211	0.194407	0.060554	30	0	0.0385399	0.211092	0.736303	0.158445	0.266867	0.977563	1.59258e+06	5.45004e+06	1.47913e+07	2.4953e+08	2.91316e+08	3.40361e+08	0	0	-0.146963	-0.158953	-0.753003	-1.0032	-0.469501
1inch	crypto	2025	7	2025-07-31	0.167553	0.249944	0.167553	0.351583	0.266044	0.279316	0.184031	31	0	0.0641257	0.357037	1.22512	0.172746	0.289089	0.977401	3.31556e+06	3.35916e+07	2.40491e+08	2.51329e+08	3.99066e+08	5.27375e+08	0	0	0.404238	0.339495	0.950867	1.96528	-0.404976
1inch	crypto	2025	8	2025-08-31	0.241779	0.242336	0.23812	0.294823	0.259021	0.257203	0.0567028	31	0	0.0476253	0.265167	0.90988	0.189977	0.192328	0.967883	3.08986e+06	1.18984e+07	6.32246e+07	3.5718e+08	3.88532e+08	4.42235e+08	0	0	-0.0304398	-0.0309127	-0.116578	-0.162718	-0.390032
1inch	crypto	2025	9	2025-09-30	0.235801	0.254374	0.224954	0.273468	0.250481	0.251286	0.048514	30	0	0.0322367	0.176568	0.615881	0.134661	0.177403	0.969659	2.70789e+06	8.08855e+06	3.49671e+07	3.37431e+08	3.75721e+08	4.10202e+08	0	0	0.0496751	0.0484807	0.274573	0.360021	-0.335128
1inch	crypto	2025	10	2025-10-31	0.262678	0.162414	0.159846	0.268707	0.202179	0.179975	0.108861	31	0	0.0613016	0.341313	1.17117	0.319329	0.40513	0.97844	2.86358e+06	9.68195e+06	2.97559e+07	2.39768e+08	3.03269e+08	4.0306e+08	0	0	-0.361515	-0.448656	-1.3145	-1.405	-0.485024
1inch	crypto	2025	11	2025-11-30	0.170466	0.187767	0.145962	0.224227	0.189607	0.189211	0.0782651	30	0	0.0743496	0.407229	1.42045	0.226008	0.242439	0.980313	2.78715e+06	1.98373e+07	1.00441e+08	2.18942e+08	2.84411e+08	3.3634e+08	0	0	0.156098	0.145051	0.356189	0.641796	-0.394746
1inch	crypto	2025	12	2025-12-31	0.18839	0.141285	0.141285	0.203076	0.164726	0.161565	0.0617912	31	0	0.0299277	0.16663	0.571767	0.137394	0.304276	0.980944	1.8613e+06	4.83776e+06	1.89794e+07	2.11927e+08	2.4709e+08	3.04614e+08	0	0	-0.247552	-0.284423	-1.70691	-2.07013	-0.367114
1inch	crypto	2026	1	2026-01-31	0.150147	0.104505	0.104505	0.167515	0.1457	0.150885	0.0630101	31	0	0.0530392	0.29531	1.01331	0.243244	0.376145	0.985905	1.23827e+06	6.19414e+06	3.93385e+07	1.56758e+08	2.1855e+08	2.51273e+08	0	0	-0.260322	-0.30154	-1.0211	-1.23966	-0.495792
1inch	crypto	2026	2	2026-02-28	0.11384	0.093382	0.0876791	0.113898	0.0967246	0.0952003	0.026219	28	0	0.0497792	0.263407	0.95103	0.199458	0.230197	0.988174	1.8747e+06	5.59879e+06	2.92543e+07	1.31519e+08	1.45087e+08	1.70847e+08	0	0	-0.106437	-0.112539	-0.427244	-0.564223	-0.534071
1inch	crypto	2026	3	2026-03-31	0.0915725	0.0904886	0.0862781	0.104721	0.0944404	0.0948007	0.0184434	31	0	0.0291841	0.16249	0.557562	0.117601	0.176119	0.988363	1.27003e+06	3.2034e+06	1.28955e+07	1.29417e+08	1.41661e+08	1.57082e+08	0	0	-0.0309845	-0.0314746	-0.193702	-0.267639	-0.533109
1inch	crypto	2026	4	2026-04-30	0.0915554	0.0924511	0.0875223	0.0980773	0.0934072	0.0941078	0.010555	30	0	0.0228855	0.125349	0.437227	0.0821158	0.0605394	0.988195	1.83442e+06	3.16431e+06	8.31817e+06	1.31284e+08	1.40111e+08	1.47116e+08	0	0	0.021688	0.0214561	0.171171	0.261291	-0.49176
aave	crypto	2020	10	2020-10-31	88.4166	29.6705	29.1258	88.4166	42.2341	38.7409	59.2908	22	0	0.104708	0.479833	2.00045	0.49554	0.670585	0.670585	251413	1.20935e+07	2.92329e+07	4.66013e+08	6.75746e+08	1.41467e+09	0	0
aave	crypto	2020	11	2020-11-30	30.6792	76.6497	27.769	78.147	58.6231	63.9835	50.3781	30	0	0.0987383	0.540812	1.88639	0.271183	0.225341	0.685931	8.14049e+06	4.78407e+07	8.33178e+07	4.44303e+08	9.3797e+08	1.25035e+09	0	0	1.58336	0.949092	1.75494	3.49982
aave	crypto	2020	12	2020-12-31	74.8018	88.3442	74.8018	91.3775	83.1117	83.2569	16.5757	31	0	0.0655552	0.364996	1.25243	0.249186	0.179705	0.179705	3.88038e+07	7.484e+07	1.36637e+08	1.19683e+09	1.32979e+09	1.46204e+09	0	0	0.152571	0.141995	0.389031	0.569835
aave	crypto	2021	1	2021-01-31	89.7314	301.041	85.6796	313.035	180.242	164.252	227.356	31	0	0.0908566	0.505868	1.73581	0.255884	0.182175	0.182175	6.52756e+07	2.54513e+08	6.57318e+08	1.37087e+09	2.88388e+09	5.00857e+09	0	0	2.40759	1.22601	2.42357	4.79124
aave	crypto	2021	2	2021-02-28	296.177	357.037	296.177	531.313	428.311	441.593	235.137	28	0	0.078301	0.41433	1.49594	0.212845	0.39298	0.39298	2.19021e+08	5.4426e+08	1.71789e+09	4.73883e+09	6.85297e+09	8.50101e+09	0	0	0.186008	0.170593	0.411733	0.801489
aave	crypto	2021	3	2021-03-31	380.963	381.846	308.647	445.321	375.971	373.365	136.674	31	0	0.0529491	0.294808	1.01159	0.200559	0.306911	0.419087	9.88353e+07	2.33675e+08	4.62123e+08	4.93835e+09	6.01553e+09	7.12513e+09	0	0	0.0694868	0.0671789	0.227873	0.334958
aave	crypto	2021	4	2021-04-30	383.91	442.11	323.55	469.085	391.904	384.08	145.535	30	0	0.0661573	0.362358	1.26393	0.234931	0.310253	0.391038	1.16798e+08	3.52194e+08	7.14479e+08	5.17679e+09	6.27047e+09	7.50535e+09	0	0	0.157823	0.146542	0.404411	0.623764
aave	crypto	2021	5	2021-05-31	501.579	382.834	293.545	627.175	445.45	456.228	333.63	31	0	0.132853	0.739694	2.53815	0.55601	0.531957	0.531957	2.16849e+08	7.51887e+08	2.28164e+09	4.69672e+09	7.1272e+09	1.00348e+10	0	0	-0.134076	-0.143958	-0.194619	-0.258914
aave	crypto	2021	6	2021-06-30	372.315	249.162	184.286	398.492	285.847	286.352	214.207	30	0	0.0748567	0.410007	1.43013	0.346576	0.537543	0.706166	8.29937e+07	2.03731e+08	4.34216e+08	2.94857e+09	4.57355e+09	6.37587e+09	0	0	-0.349165	-0.429499	-1.04754	-1.23926
aave	crypto	2021	7	2021-07-31	231.715	331.688	223.666	331.688	282.167	287.152	108.022	31	0	0.0575365	0.320349	1.09923	0.185931	0.296834	0.643376	9.81673e+07	2.40554e+08	7.1274e+08	3.57866e+09	4.51467e+09	5.30701e+09	0	0	0.331216	0.286093	0.893065	1.5387
aave	crypto	2021	8	2021-08-31	317.682	394.207	309.269	426.325	379.529	384.046	117.056	31	0	0.0485256	0.270179	0.92708	0.162156	0.167366	0.506886	8.76995e+07	2.13301e+08	4.71295e+08	4.9483e+09	6.07246e+09	6.8212e+09	0	0	0.188488	0.172682	0.639138	1.06491
aave	crypto	2021	9	2021-09-30	411.258	275.328	262.176	416.86	335.299	332.177	154.684	30	0	0.0692514	0.379305	1.32305	0.304009	0.371069	0.581973	9.56056e+07	2.27145e+08	5.38314e+08	4.19482e+09	5.36478e+09	6.66976e+09	0	0	-0.301567	-0.358915	-0.946244	-1.18061
aave	crypto	2021	10	2021-10-31	300.921	314.658	283.126	338.326	308.888	307.434	55.1999	31	0	0.0329697	0.183568	0.629886	0.106901	0.0997868	0.548569	6.77236e+07	2.27329e+08	2.57248e+09	4.53002e+09	4.94221e+09	5.41322e+09	0	0	0.142849	0.133524	0.727384	1.24905
aave	crypto	2021	11	2021-11-30	323.421	257.257	232.18	338.18	290.22	292.877	106	30	0	0.0427962	0.234405	0.817621	0.203605	0.313442	0.6298	7.51493e+07	1.53484e+08	3.3248e+08	3.71489e+09	4.64352e+09	5.41088e+09	0	0	-0.182424	-0.201411	-0.859247	-0.989228
aave	crypto	2021	12	2021-12-31	251.021	255.964	162.741	278.031	211.192	192.741	115.29	31	0	0.0699592	0.389516	1.33657	0.260001	0.351683	0.740517	4.92084e+07	2.07672e+08	6.65067e+08	2.60386e+09	3.37907e+09	4.4485e+09	0	0	-0.00502351	-0.00503617	-0.0129293	-0.0193698
aave	crypto	2022	1	2022-01-31	263.829	157.475	143.724	267.231	201.092	210.142	123.507	31	0	0.0605053	0.336879	1.15595	0.300369	0.462173	0.770839	6.47027e+07	2.04451e+08	3.85411e+08	2.29959e+09	3.21747e+09	4.2757e+09	0	0	-0.384776	-0.485769	-1.44197	-1.61724
aave	crypto	2022	2	2022-02-28	164.05	145.135	124.745	188.515	155.315	155.845	63.7701	28	0	0.0580119	0.30697	1.10832	0.213706	0.338277	0.801101	4.12318e+07	9.29656e+07	1.55578e+08	1.99591e+09	2.48504e+09	3.01624e+09	0	0	-0.0783641	-0.0816051	-0.26584	-0.381856
aave	crypto	2022	3	2022-03-31	143.365	206.352	115.855	224.486	147.394	143.365	108.63	31	0	0.0664369	0.369905	1.26928	0.164602	0.191884	0.815274	5.66268e+07	2.02039e+08	1.13182e+09	1.85368e+09	2.35831e+09	3.59177e+09	0	0	0.421791	0.351918	0.951373	2.13799
aave	crypto	2022	4	2022-04-30	245.322	142.635	142.635	245.322	183.601	175.045	102.687	30	0	0.0664741	0.364093	1.26999	0.281628	0.418581	0.772575	5.28912e+07	2.0584e+08	9.79758e+08	2.28216e+09	2.93761e+09	3.92516e+09	0	0	-0.308777	-0.369292	-1.01428	-1.31127
aave	crypto	2022	5	2022-05-31	146.328	113.882	77.3939	158.372	106.597	99.1812	80.9779	31	0	0.0928432	0.516929	1.77377	0.403175	0.511315	0.876599	3.93827e+07	1.20691e+08	3.3555e+08	1.2383e+09	1.70555e+09	2.53395e+09	0	0	-0.201583	-0.225124	-0.435503	-0.558378
aave	crypto	2022	6	2022-06-30	107.041	55.6828	49.2971	111.257	75.8952	67.1758	61.96	30	0	0.0801909	0.439224	1.53205	0.391684	0.556909	0.921398	2.34093e+07	8.12859e+07	1.95e+08	7.88753e+08	1.21432e+09	1.78011e+09	0	0	-0.51105	-0.715494	-1.629	-1.82671
aave	crypto	2022	7	2022-07-31	56.5503	98.2804	56.5503	100.057	81.9404	89.2532	43.5069	31	0	0.0683392	0.380497	1.30562	0.185693	0.163806	0.909833	3.92333e+07	1.10407e+08	2.23883e+08	9.04804e+08	1.31105e+09	1.60091e+09	0	0	0.765004	0.568153	1.49319	3.05964
aave	crypto	2022	8	2022-08-31	96.6984	84.7729	79.2038	113.812	95.4851	95.6036	34.6083	31	0	0.0532387	0.29642	1.01712	0.226657	0.304083	0.873713	4.55691e+07	8.03258e+07	1.64003e+08	1.26726e+09	1.52776e+09	1.82099e+09	0	0	-0.137439	-0.147849	-0.498781	-0.652304
aave	crypto	2022	9	2022-09-30	86.377	74.4315	71.7906	93.1699	81.7463	80.2942	21.3793	30	0	0.0407197	0.223031	0.777949	0.186252	0.229465	0.885533	2.62424e+07	5.99825e+07	1.59229e+08	1.14865e+09	1.30794e+09	1.49072e+09	0	0	-0.121989	-0.130096	-0.58331	-0.698495
aave	crypto	2022	10	2022-10-31	74.4735	83.9261	71.0841	88.8348	78.7356	78.9777	17.7508	31	0	0.0290762	0.161889	0.5555	0.0875073	0.0999471	0.88666	1.6216e+07	4.65303e+07	1.01133e+08	1.13735e+09	1.25977e+09	1.42136e+09	0	0	0.127561	0.120057	0.741598	1.37196
aave	crypto	2022	11	2022-11-30	84.3985	65.3954	55.8599	96.1949	66.572	60.495	40.3351	30	0	0.0759541	0.416018	1.4511	0.341548	0.419305	0.910934	1.57062e+07	6.27571e+07	1.74946e+08	8.93758e+08	1.06515e+09	1.53912e+09	0	0	-0.220797	-0.249484	-0.599696	-0.730451
aave	crypto	2022	12	2022-12-31	63.5279	51.8806	51.8806	65.5231	58.4872	57.3848	13.6425	31	0	0.0319657	0.177978	0.610704	0.160642	0.208208	0.917279	6.57662e+06	2.03729e+07	3.40769e+07	8.3009e+08	9.35796e+08	1.04837e+09	0	0	-0.206662	-0.231506	-1.30076	-1.44113
aave	crypto	2023	1	2023-01-31	51.9968	82.9804	51.9968	88.9545	73.3644	79.8808	36.9577	31	0	0.0416428	0.231857	0.795585	0.133861	0.0896157	0.917094	1.33816e+07	6.0616e+07	1.77779e+08	8.31949e+08	1.17383e+09	1.42327e+09	0	0	0.599448	0.469658	2.02563	3.50855
aave	crypto	2023	2	2023-02-28	88.1667	77.6499	77.3779	91.8593	84.7826	85.1956	14.4813	28	0	0.0414091	0.219117	0.791121	0.161031	0.154686	0.876625	1.99763e+07	5.44905e+07	1.46688e+08	1.23805e+09	1.35652e+09	1.46975e+09	0	0	-0.0642383	-0.0663944	-0.303009	-0.412308
aave	crypto	2023	3	2023-03-31	82.6563	74.3087	67.196	82.6563	74.7595	75.0186	15.4603	31	0	0.0411133	0.228909	0.785469	0.158127	0.187043	0.892859	1.70484e+07	2.98297e+07	5.84244e+07	1.07514e+09	1.19615e+09	1.3225e+09	0	0	-0.0430293	-0.0439825	-0.192139	-0.278147
aave	crypto	2023	4	2023-04-30	74.253	70.6901	69.0794	83.1968	75.6504	75.3071	14.1175	30	0	0.0282562	0.154765	0.539833	0.129076	0.169688	0.889856	9.81064e+06	2.30326e+07	4.4574e+07	1.10527e+09	1.21041e+09	1.33115e+09	0	0	-0.0486968	-0.0499225	-0.322569	-0.386769
aave	crypto	2023	5	2023-05-31	68.9336	63.7907	62.242	73.571	65.8759	64.7799	11.329	31	0	0.0262908	0.146381	0.502285	0.116037	0.153987	0.900758	8.54977e+06	1.46417e+07	3.09211e+07	9.95872e+08	1.05401e+09	1.17714e+09	0	0	-0.0976004	-0.102698	-0.701579	-0.885047
aave	crypto	2023	6	2023-06-30	62.6888	70.4891	50.0849	70.4891	58.0644	58.0836	20.4042	30	0	0.0580904	0.318174	1.10982	0.200701	0.213131	0.920142	9.66941e+06	4.5861e+07	5.16153e+08	8.01358e+08	9.29031e+08	1.12783e+09	0	0	0.105006	0.0998505	0.313823	0.497508
aave	crypto	2023	7	2023-07-31	68.1316	65.3335	65.3335	81.0443	73.0945	72.4279	15.7108	31	0	0.036503	0.20324	0.697389	0.150339	0.193854	0.895829	1.70418e+07	4.79006e+07	1.36882e+08	1.04534e+09	1.16951e+09	1.29671e+09	0	0	-0.0731399	-0.0759526	-0.373709	-0.505209
aave	crypto	2023	8	2023-08-31	65.3567	55.5239	54.8744	67.3185	61.0459	60.2766	12.4441	31	0	0.0244601	0.136188	0.46731	0.120013	0.184854	0.912505	3.13563e+07	4.52478e+07	8.35263e+07	8.7799e+08	9.76735e+08	1.0771e+09	0	0	-0.150147	-0.162692	-1.19461	-1.35562
aave	crypto	2023	9	2023-09-30	54.5477	67.56	52.0322	67.56	58.7521	57.7798	15.5278	30	0	0.0284931	0.156063	0.544359	0.08357	0.0784735	0.917037	1.90604e+07	4.09493e+07	7.57909e+07	8.32515e+08	9.40034e+08	1.08096e+09	0	0	0.216775	0.196204	1.25721	2.34778
aave	crypto	2023	10	2023-10-31	72.1039	81.257	62.0753	85.359	70.9227	66.7475	23.2837	31	0	0.0409808	0.228172	0.782938	0.122465	0.139086	0.901024	1.91384e+07	5.92714e+07	1.8997e+08	9.93205e+08	1.13476e+09	1.36574e+09	0	0	0.202737	0.1846	0.809041	1.50737	0.452146
aave	crypto	2023	11	2023-11-30	88.7761	98.1716	85.0496	100.158	94.3637	95.6134	15.1088	30	0	0.0420388	0.230256	0.80315	0.114161	0.150849	0.864393	6.18051e+07	1.08776e+08	2.25256e+08	1.36079e+09	1.50982e+09	1.60253e+09	0	0	0.208162	0.1891	0.821262	1.65644	0.0974202
aave	crypto	2023	12	2023-12-31	100.208	108.959	91.4477	119.292	102.127	100.14	27.8441	31	0	0.038866	0.216397	0.742534	0.121093	0.124825	0.854191	6.32925e+07	1.2696e+08	3.88894e+08	1.46316e+09	1.63404e+09	1.90867e+09	0	0	0.10988	0.104252	0.481763	0.860926	0.082038
aave	crypto	2024	1	2024-01-31	115.639	86.0886	86.0886	115.639	98.4145	97.2994	29.5502	31	0	0.0422685	0.235341	0.807538	0.181528	0.255539	0.862736	4.84174e+07	9.71128e+07	1.86128e+08	1.37742e+09	1.57463e+09	1.85022e+09	0	0	-0.209897	-0.235592	-1.00107	-1.29783	-0.386528
aave	crypto	2024	2	2024-02-29	83.717	105.554	83.2785	105.554	92.2488	91.7458	22.2752	29	0	0.0222411	0.119772	0.424916	0.0608674	0.0537325	0.867217	4.6497e+07	9.43858e+07	1.72533e+08	1.33246e+09	1.47598e+09	1.68886e+09	0	0	0.226105	0.203842	1.70192	3.34895	-0.378209
aave	crypto	2024	3	2024-03-31	110.194	128.069	105.495	142.652	124.782	126.037	37.1569	31	0	0.0619105	0.344703	1.1828	0.21268	0.236708	0.831793	3.693e+07	1.19989e+08	3.04955e+08	1.68792e+09	1.99651e+09	2.28243e+09	0	0	0.213302	0.193346	0.560905	0.909092	-0.345792
aave	crypto	2024	4	2024-04-30	129.535	83.3009	82.9362	129.535	101.047	91.7678	46.5984	30	0	0.0607659	0.332828	1.16093	0.305762	0.359737	0.867762	3.05156e+07	7.01251e+07	1.60896e+08	1.32698e+09	1.61676e+09	2.07255e+09	0	0	-0.34956	-0.430106	-1.29228	-1.40667	-0.483443
aave	crypto	2024	5	2024-05-31	83.6191	103.567	80.3703	110.175	92.3256	88.9218	29.8047	31	0	0.0375985	0.20934	0.718318	0.0975828	0.105847	0.871854	2.06631e+07	4.96618e+07	9.65081e+07	1.28592e+09	1.47721e+09	1.7628e+09	0	0	0.243292	0.217762	1.04024	2.23157	-0.406785
aave	crypto	2024	6	2024-06-30	104.08	96.906	80.6859	104.29	91.5536	91.3989	23.6041	30	0	0.0342993	0.187865	0.655288	0.130356	0.226331	0.87135	2.78545e+07	5.76076e+07	1.04663e+08	1.29097e+09	1.46486e+09	1.66864e+09	0	0	-0.0643183	-0.06648	-0.35387	-0.509988	-0.310984
aave	crypto	2024	7	2024-07-31	98.4734	107.407	78.4628	107.407	94.6562	97.9074	28.9445	31	0	0.0410976	0.228822	0.785168	0.161245	0.203208	0.874895	2.85603e+07	5.94775e+07	1.15157e+08	1.25541e+09	1.5145e+09	1.71852e+09	0	0	0.108367	0.102888	0.449641	0.638083	-0.36078
aave	crypto	2024	8	2024-08-31	116.369	129.761	91.4048	143.851	114.639	111.548	52.4466	31	0	0.0519279	0.289122	0.992081	0.173616	0.214529	0.85426	4.55507e+07	1.22186e+08	2.60711e+08	1.46248e+09	1.83423e+09	2.30162e+09	0	0	0.208121	0.189066	0.653931	1.08899	-0.356449
aave	crypto	2024	9	2024-09-30	121.12	156.409	119.605	172.189	146.426	144.958	52.5836	30	0	0.0545622	0.298849	1.04241	0.170447	0.112518	0.809295	5.2122e+07	1.39826e+08	3.24608e+08	1.91368e+09	2.34281e+09	2.75502e+09	0	0	0.205362	0.18678	0.624997	1.09582	-0.205714
aave	crypto	2024	10	2024-10-31	145.414	143.574	136.813	162.664	149.618	149.931	25.8513	31	0	0.0386988	0.215466	0.73934	0.160805	0.158924	0.781859	3.18182e+07	7.3853e+07	1.66157e+08	2.18901e+09	2.39389e+09	2.60263e+09	0	0	-0.0820636	-0.0856271	-0.397404	-0.532491	-0.275577
aave	crypto	2024	11	2024-11-30	141.549	211.418	128.276	211.418	171.962	172.254	83.1415	30	0	0.0680638	0.372801	1.30036	0.16572	0.198035	0.79547	3.49204e+07	1.68724e+08	3.53537e+08	2.05242e+09	2.7514e+09	3.38268e+09	0	0	0.472539	0.386988	1.03806	2.33519	-0.0793147
aave	crypto	2024	12	2024-12-31	209.545	308.947	209.545	382.977	316.19	320.784	173.433	31	0	0.0774171	0.43104	1.47905	0.221708	0.215648	0.665891	1.42491e+08	3.81297e+08	1.07083e+09	3.35272e+09	5.05905e+09	6.12764e+09	0	0	0.46131	0.379333	0.880041	1.71095	0.0811704
aave	crypto	2025	1	2025-01-31	319.603	333.341	280.982	371.095	318.214	317.704	90.1132	31	0	0.0509021	0.283411	0.972482	0.182328	0.236354	0.551988	7.87796e+07	2.5129e+08	8.73819e+08	4.49571e+09	5.09142e+09	5.93753e+09	0	0	0.0789576	0.0759954	0.268146	0.416806	0.379358
aave	crypto	2025	2	2025-02-28	297.43	192.126	192.126	297.43	245.425	250.188	105.305	28	0	0.0573305	0.303364	1.0953	0.291723	0.354048	0.693665	7.9335e+07	2.08076e+08	7.67819e+08	3.07401e+09	3.9268e+09	4.75888e+09	0	0	-0.423636	-0.551016	-1.81635	-1.88883	0.130921
aave	crypto	2025	3	2025-03-31	194.208	159.417	159.417	223.564	182.922	179.77	64.147	31	0	0.0671993	0.37415	1.28384	0.279848	0.286929	0.745818	8.08108e+07	1.836e+08	4.05013e+08	2.55067e+09	2.92676e+09	3.57702e+09	0	0	-0.170246	-0.186626	-0.4988	-0.666885	-0.110107
aave	crypto	2025	4	2025-04-30	166.566	164.573	125.014	172.757	148.694	145.575	47.7429	30	0	0.0590703	0.323541	1.12854	0.233143	0.249465	0.800672	5.60288e+07	1.33586e+08	2.99697e+08	2.00022e+09	2.3791e+09	2.76411e+09	0	0	0.032343	0.031831	0.0983831	0.13653	0.076765
aave	crypto	2025	5	2025-05-31	173.001	248.638	171.614	272.089	226.871	229.343	100.475	31	0	0.0463225	0.257913	0.88499	0.11081	0.0861886	0.72637	9.42661e+07	2.1413e+08	4.23081e+08	2.74583e+09	3.62993e+09	4.35342e+09	0	0	0.510806	0.412644	1.59994	3.72389	0.54605
aave	crypto	2025	6	2025-06-30	246.857	275.203	227.186	307.509	264.596	259.581	80.3228	30	0	0.0478338	0.261997	0.913864	0.147147	0.261205	0.637763	8.40312e+07	2.31163e+08	5.94136e+08	3.63498e+09	4.23353e+09	4.92014e+09	0	0	0.106844	0.101513	0.38746	0.689876	1.34809
aave	crypto	2025	7	2025-07-31	260.058	261.253	260.058	327.331	296.811	295.32	67.273	31	0	0.0334562	0.186276	0.63918	0.140274	0.201868	0.58535	1.01651e+08	2.30934e+08	5.00899e+08	4.16093e+09	4.74897e+09	5.2373e+09	0	0	-0.0506898	-0.0520197	-0.279261	-0.370843	0.738389
aave	crypto	2025	8	2025-08-31	255.781	316.062	249.286	357.648	302.208	303.674	108.362	31	0	0.0510678	0.284334	0.975649	0.163454	0.165042	0.602525	8.44558e+07	2.39457e+08	6.83546e+08	3.98858e+09	4.83533e+09	5.72237e+09	0	0	0.209791	0.190447	0.669803	1.16514	1.05531
aave	crypto	2025	9	2025-09-30	303.485	274.371	259.807	328.235	295.483	299.364	68.4273	30	0	0.0325727	0.178408	0.6223	0.148315	0.208471	0.58575	6.48864e+07	1.62763e+08	3.22515e+08	4.15692e+09	4.72774e+09	5.25175e+09	0	0	-0.131908	-0.141458	-0.792891	-0.953768	1.04408
aave	crypto	2025	10	2025-10-31	285.848	228.981	206.313	297.767	246.158	233.779	91.4541	31	0	0.0546543	0.304303	1.04417	0.254551	0.307133	0.671044	5.12751e+07	1.69234e+08	4.42093e+08	3.30101e+09	3.93852e+09	4.76428e+09	0	0	-0.165433	-0.180843	-0.594286	-0.710439	0.761529
aave	crypto	2025	11	2025-11-30	222.709	178.471	157.129	229.177	189.173	185.818	72.0477	30	0	0.0543024	0.297427	1.03745	0.245467	0.314376	0.749466	3.45197e+07	1.28314e+08	2.72818e+08	2.51406e+09	3.02677e+09	3.66683e+09	0	0	-0.220586	-0.249212	-0.837895	-1.01526	0.761772
aave	crypto	2025	12	2025-12-31	171.953	146.153	146.153	203.552	175.685	181.717	57.3994	31	0	0.0423365	0.23572	0.808838	0.181482	0.281988	0.766967	3.65917e+07	1.28074e+08	3.43371e+08	2.33844e+09	2.81096e+09	3.25683e+09	0	0	-0.181083	-0.199773	-0.8475	-1.10079	0.734256
aave	crypto	2026	1	2026-01-31	148.907	128.636	128.636	178.647	161.624	163.927	50.0107	31	0	0.0428551	0.238607	0.818745	0.176879	0.279942	0.794896	3.37041e+07	1.0998e+08	1.84645e+08	2.05818e+09	2.58598e+09	2.85835e+09	0	0	-0.119852	-0.127665	-0.535044	-0.721767	0.256219
aave	crypto	2026	2	2026-02-28	124.383	112.11	102.297	128.485	118.029	116.897	26.1877	28	0	0.0533092	0.282086	1.01847	0.221384	0.203819	0.836892	7.16647e+07	1.67375e+08	4.26212e+08	1.63676e+09	1.88846e+09	2.05576e+09	0	0	-0.128469	-0.137503	-0.487452	-0.621109	0.196231
aave	crypto	2026	3	2026-03-31	113.652	97.9937	95.3319	122.588	109.945	111.233	27.256	31	0	0.0376085	0.209395	0.718509	0.164498	0.222339	0.847998	3.79105e+07	1.26577e+08	2.82721e+08	1.52531e+09	1.75912e+09	1.96141e+09	0	0	-0.125917	-0.13458	-0.64271	-0.818129	0.136839
aave	crypto	2026	4	2026-04-30	98.1553	92.6863	89.7858	115.354	96.4132	94.2654	25.5682	30	0	0.0500302	0.274027	0.955826	0.19776	0.218108	0.856841	3.62747e+07	1.11322e+08	2.92417e+08	1.43657e+09	1.54261e+09	1.84566e+09	0	0	-0.0541603	-0.0556822	-0.2032	-0.281564	0.130908
ada	crypto	2017	12	2017-12-31	0.129954	0.727614	0.107165	0.727614	0.31749	0.394342	0.620449	31	0	0.179664	0.984062	3.43248	0.269474	0.254563	0.254563	1.22165e+07	6.30086e+07	3.1308e+08	3.33417e+09	9.87788e+09	2.26379e+10	2	0
ada	crypto	2018	1	2018-01-31	0.737355	0.495648	0.495648	1.1606	0.737128	0.677669	0.664956	31	0	0.115164	0.641206	2.20021	0.453296	0.57294	0.57294	2.19774e+07	1.03276e+08	3.28073e+08	1.54208e+10	2.29339e+10	3.61092e+10	0	0	-0.318804	-0.383906	-0.598724	-0.846921
ada	crypto	2018	2	2018-02-28	0.409766	0.302282	0.30102	0.45198	0.360979	0.3637	0.15096	28	0	0.0956061	0.5059	1.82655	0.407566	0.333998	0.740635	1.17129e+06	3.39668e+07	7.39575e+07	9.36545e+09	1.12309e+10	1.40622e+10	0	0	-0.390127	-0.494504	-0.977474	-1.21331
ada	crypto	2018	3	2018-03-31	0.30038	0.151294	0.141958	0.30038	0.206244	0.19912	0.158421	31	0	0.0716863	0.399132	1.36956	0.342287	0.527404	0.877686	1.22854e+07	2.94342e+07	4.50823e+07	4.41667e+09	6.41674e+09	9.34554e+09	0	0	-0.499495	-0.692137	-1.73411	-2.0221
ada	crypto	2018	4	2018-04-30	0.147121	0.336566	0.142718	0.362693	0.231244	0.234544	0.219975	30	0	0.0890747	0.487882	1.70177	0.229704	0.157817	0.877031	1.51215e+07	6.85115e+07	2.24723e+08	4.44031e+09	7.19456e+09	1.12843e+10	0	0	1.22459	0.799571	1.63886	3.48088
ada	crypto	2018	5	2018-05-31	0.354539	0.222012	0.173289	0.371304	0.26577	0.254579	0.198015	31	0	0.0595302	0.33145	1.13732	0.268294	0.533296	0.85069	2.96789e+07	5.96501e+07	1.24839e+08	5.39144e+09	8.26875e+09	1.15522e+10	0	0	-0.340362	-0.416065	-1.25529	-1.55078
ada	crypto	2018	6	2018-06-30	0.220139	0.136618	0.118263	0.227038	0.169486	0.161983	0.108775	30	0	0.0549463	0.300953	1.04975	0.273471	0.479105	0.898102	1.27911e+07	3.83927e+07	7.11095e+07	3.67944e+09	5.2731e+09	7.06368e+09	0	0	-0.384635	-0.48554	-1.61334	-1.77547
ada	crypto	2018	7	2018-07-31	0.143597	0.141771	0.124288	0.182037	0.153911	0.153395	0.0577489	31	0	0.0534391	0.297536	1.02095	0.20547	0.221197	0.892911	2.41028e+07	5.87853e+07	1.60784e+08	3.86688e+09	4.78855e+09	5.66359e+09	0	0	0.0377131	0.0370193	0.12442	0.180169
ada	crypto	2018	8	2018-08-31	0.139604	0.102092	0.0897103	0.139604	0.107704	0.102092	0.0498941	31	0	0.0581955	0.324019	1.11182	0.251545	0.357396	0.922704	1.84782e+07	3.10205e+07	5.01581e+07	2.7911e+09	3.35092e+09	4.34342e+09	0	0	-0.279878	-0.328335	-1.01332	-1.30528
ada	crypto	2018	9	2018-09-30	0.106947	0.084905	0.0634165	0.106947	0.0815131	0.081683	0.0435301	30	0	0.0640628	0.350886	1.22392	0.267622	0.407027	0.945359	1.74671e+07	3.72918e+07	9.80354e+07	1.97304e+09	2.53607e+09	3.32736e+09	0	0	-0.168349	-0.184342	-0.525361	-0.688815
ada	crypto	2018	10	2018-10-31	0.0838262	0.0698562	0.0692953	0.0862082	0.0762586	0.0747582	0.0169128	31	0	0.0382312	0.212862	0.730405	0.196624	0.196186	0.940294	5.30585e+06	1.64401e+07	4.0884e+07	2.15594e+09	2.37258e+09	2.68214e+09	0	0	-0.177243	-0.195094	-0.916529	-0.992222
ada	crypto	2018	11	2018-11-30	0.0705522	0.0384071	0.0349349	0.0805129	0.0591421	0.0615431	0.045578	30	0	0.0699022	0.38287	1.33548	0.340597	0.566096	0.969899	5.80965e+06	1.62901e+07	3.37567e+07	1.08691e+09	1.84005e+09	2.50494e+09	0	0	-0.450197	-0.598195	-1.5624	-1.75631
ada	crypto	2018	12	2018-12-31	0.0409663	0.040505	0.0279254	0.0457246	0.0358573	0.0362029	0.0177992	31	0	0.0651059	0.362494	1.24385	0.248487	0.32277	0.975939	3.80692e+06	1.40955e+07	4.15338e+07	8.68825e+08	1.1156e+09	1.4226e+09	0	0	0.0546203	0.0531808	0.146708	0.214019
ada	crypto	2019	1	2019-01-31	0.0420688	0.0379782	0.0379433	0.0519898	0.0433207	0.0432602	0.0140464	31	0	0.0543383	0.302543	1.03813	0.228039	0.270177	0.967307	6.27344e+06	1.51374e+07	4.57183e+07	1.18051e+09	1.34781e+09	1.61752e+09	0	0	-0.0623819	-0.0644126	-0.212904	-0.282464
ada	crypto	2019	2	2019-02-28	0.0384886	0.0426238	0.0360761	0.048384	0.0414861	0.0412177	0.0123079	28	0	0.0442744	0.234278	0.845861	0.158145	0.12784	0.968916	5.42069e+06	1.24708e+07	3.2062e+07	1.12241e+09	1.29073e+09	1.50534e+09	0	0	0.122324	0.115402	0.492584	0.72972
ada	crypto	2019	3	2019-03-31	0.0429677	0.0696703	0.040099	0.0719163	0.0523116	0.0496486	0.0318173	31	0	0.0446922	0.248836	0.853843	0.0965481	0.0782588	0.96545	6.61474e+06	4.9725e+07	1.4303e+08	1.24757e+09	1.62753e+09	2.23748e+09	0	0	0.634539	0.491361	1.97464	5.08929
ada	crypto	2019	4	2019-04-30	0.0721715	0.068918	0.0637282	0.0907768	0.0796057	0.0823776	0.0270486	30	0	0.0501758	0.274824	0.958607	0.154528	0.297968	0.94509	3.79236e+07	1.03291e+08	3.17688e+08	1.98273e+09	2.47672e+09	2.82427e+09	0	0	-0.0107978	-0.0108565	-0.0395035	-0.0702561
ada	crypto	2019	5	2019-05-31	0.0680554	0.089255	0.0613952	0.0941021	0.0778312	0.0803498	0.0327068	31	0	0.069236	0.38549	1.32275	0.202185	0.171115	0.947101	3.65945e+07	1.18665e+08	2.97986e+08	1.91015e+09	2.42151e+09	2.92773e+09	0	0	0.295089	0.258579	0.670781	1.27892
ada	crypto	2019	6	2019-06-30	0.0908959	0.0818006	0.0788123	0.0969176	0.0892261	0.0894942	0.0181053	30	0	0.0514098	0.281583	0.982184	0.227287	0.180107	0.932094	9.9325e+07	1.57279e+08	3.67183e+08	2.45203e+09	2.77603e+09	3.01533e+09	0	0	-0.0835181	-0.087213	-0.309723	-0.383713
ada	crypto	2019	7	2019-07-31	0.0833001	0.0600608	0.0519757	0.0833001	0.0661843	0.0610406	0.0313244	31	0	0.0532121	0.296272	1.01662	0.250428	0.376043	0.955217	2.29824e+07	7.93498e+07	1.54069e+08	1.61708e+09	2.05914e+09	2.59165e+09	0	0	-0.265765	-0.308927	-1.04271	-1.2336
ada	crypto	2019	8	2019-08-31	0.0587869	0.044913	0.0445643	0.0587869	0.0506032	0.0498238	0.0142226	31	0	0.0424002	0.236074	0.810054	0.194739	0.241936	0.961603	1.99839e+07	3.64941e+07	7.67666e+07	1.38649e+09	1.57438e+09	1.82899e+09	0	0	-0.252207	-0.29063	-1.23109	-1.4924
ada	crypto	2019	9	2019-09-30	0.0445546	0.0388554	0.0373794	0.0532097	0.0452115	0.0459164	0.0158303	30	0	0.0467257	0.255927	0.892693	0.22263	0.297508	0.967793	1.29893e+07	3.20197e+07	8.0629e+07	1.16296e+09	1.40663e+09	1.65547e+09	0	0	-0.134874	-0.14488	-0.5661	-0.650767
ada	crypto	2019	10	2019-10-31	0.0383913	0.0413496	0.0362257	0.0433844	0.0401225	0.0396713	0.0071587	31	0	0.0340516	0.189591	0.650555	0.117275	0.150474	0.968787	1.19564e+07	2.33543e+07	6.23578e+07	1.12706e+09	1.2483e+09	1.34978e+09	0	0	0.0641907	0.0622146	0.328151	0.530503
ada	crypto	2019	11	2019-11-30	0.0422547	0.040459	0.0352472	0.0450621	0.0414584	0.0423195	0.00981496	30	0	0.0324601	0.177792	0.62015	0.131204	0.217809	0.96963	8.88127e+06	2.32341e+07	4.50378e+07	1.09662e+09	1.28986e+09	1.40198e+09	0	0	-0.0215369	-0.0217722	-0.122459	-0.165942
ada	crypto	2019	12	2019-12-31	0.0396175	0.0326805	0.0315575	0.0396175	0.0354106	0.0344321	0.00806005	31	0	0.0326708	0.181903	0.624174	0.146142	0.203447	0.972809	8.071e+06	1.50906e+07	2.3974e+07	9.81821e+08	1.1017e+09	1.23259e+09	0	0	-0.192256	-0.21351	-1.17376	-1.46098
ada	crypto	2020	1	2020-01-31	0.0333751	0.053947	0.032636	0.0561688	0.0418391	0.0419968	0.0235328	31	0	0.0448809	0.249886	0.857449	0.112446	0.0721851	0.97188	8.50613e+06	3.35541e+07	1.15425e+08	1.01538e+09	1.3017e+09	1.74753e+09	0	0	0.650737	0.501222	2.0058	4.45746
ada	crypto	2020	2	2020-02-29	0.056139	0.0474744	0.0474744	0.0709337	0.0591126	0.0593871	0.0234592	29	0	0.0484119	0.260706	0.924908	0.207969	0.330721	0.959095	2.50069e+07	6.04987e+07	1.24462e+08	1.47703e+09	1.83912e+09	2.2069e+09	0	0	-0.11998	-0.12781	-0.490247	-0.614565
ada	crypto	2020	3	2020-03-31	0.045836	0.0305396	0.0241058	0.0515855	0.0346974	0.0298366	0.0274797	31	0	0.113395	0.631357	2.16641	0.554149	0.532703	0.97923	1.47207e+07	3.39856e+07	1.15287e+08	7.49982e+08	1.07951e+09	1.60494e+09	0	0	-0.356715	-0.441168	-0.698761	-0.796118
ada	crypto	2020	4	2020-04-30	0.0308948	0.0479636	0.0308948	0.0514511	0.0370898	0.0349659	0.0205564	30	0	0.0482978	0.264538	0.922727	0.132261	0.126514	0.97338	9.39635e+06	2.82607e+07	9.44315e+07	9.61202e+08	1.15394e+09	1.60075e+09	0	0	0.570538	0.451418	1.70644	3.41308
ada	crypto	2020	5	2020-05-31	0.0509583	0.0736359	0.0475576	0.077094	0.0542849	0.0516584	0.0295364	31	0	0.0565517	0.314867	1.08042	0.143082	0.0903536	0.959023	2.01046e+07	6.0827e+07	3.61455e+08	1.47962e+09	1.68892e+09	2.39855e+09	0	0	0.535246	0.42869	1.3615	2.99611
ada	crypto	2020	6	2020-06-30	0.081828	0.0832328	0.0750078	0.0886069	0.081681	0.081866	0.0135991	30	0	0.0427077	0.23392	0.815929	0.141972	0.153477	0.935372	3.27225e+07	9.1563e+07	2.5242e+08	2.33365e+09	2.54126e+09	2.75674e+09	0	0	0.13033	0.12251	0.523725	0.862915
ada	crypto	2020	7	2020-07-31	0.0958187	0.139477	0.0932145	0.149207	0.123429	0.124161	0.0559922	31	0	0.0589525	0.328233	1.12629	0.140734	0.110151	0.919684	6.47905e+07	1.95952e+08	6.05137e+08	2.90009e+09	3.84012e+09	4.64212e+09	0	0	0.67574	0.516255	1.57283	3.66829
ada	crypto	2020	8	2020-08-31	0.145387	0.122479	0.106829	0.145932	0.131751	0.137064	0.0391027	31	0	0.0417582	0.2325	0.797788	0.190844	0.267952	0.907954	6.18755e+07	1.12674e+08	2.05821e+08	3.37556e+09	4.14368e+09	4.58652e+09	0	0	-0.121867	-0.129957	-0.558956	-0.680959
ada	crypto	2020	9	2020-09-30	0.125148	0.101108	0.0766221	0.125148	0.0949769	0.0945475	0.0485259	30	0	0.0633056	0.346739	1.20945	0.27682	0.387748	0.933981	3.85009e+07	8.62762e+07	1.75022e+08	2.42363e+09	3.00362e+09	3.95583e+09	0	0	-0.174487	-0.19175	-0.55301	-0.692688
ada	crypto	2020	10	2020-10-31	0.0977319	0.0929478	0.0926321	0.110779	0.102033	0.103399	0.0181467	31	0	0.0303354	0.1689	0.579557	0.126431	0.160961	0.920186	3.06297e+07	7.03911e+07	1.43727e+08	2.93073e+09	3.2299e+09	3.50607e+09	0	0	-0.0807079	-0.0841514	-0.498231	-0.665591
ada	crypto	2020	11	2020-11-30	0.0980063	0.171951	0.0926519	0.171951	0.120257	0.106555	0.0792993	30	0	0.0634146	0.347336	1.21153	0.176662	0.174819	0.920169	3.97437e+07	2.02437e+08	7.80019e+08	2.93629e+09	3.81265e+09	5.45543e+09	0	0	0.849975	0.615172	1.77112	3.48221
ada	crypto	2020	12	2020-12-31	0.155858	0.181691	0.138944	0.18994	0.158366	0.157146	0.0509957	31	0	0.0582948	0.324572	1.11372	0.223608	0.168541	0.880283	8.69074e+07	2.07419e+08	7.30766e+08	4.41818e+09	5.03196e+09	6.04146e+09	0	0	0.0566413	0.0550953	0.169748	0.246392	-0.386508
ada	crypto	2021	1	2021-01-31	0.175674	0.34696	0.175674	0.383896	0.3134	0.331324	0.208222	31	0	0.0923209	0.514021	1.76379	0.281219	0.185552	0.848636	2.15377e+08	7.53653e+08	1.91209e+09	5.58869e+09	9.98105e+09	1.22267e+10	0	0	0.90962	0.646904	1.25852	2.30036	-0.11945
ada	crypto	2021	2	2021-02-28	0.403673	1.31324	0.403673	1.31324	0.86445	0.909396	0.909566	28	0	0.0847398	0.448401	1.61895	0.151704	0.14908	0.652187	6.82599e+08	2.67974e+09	7.48032e+09	1.28676e+10	2.75909e+10	4.19555e+10	0	0	2.78499	1.33104	2.96842	8.77393	0.694754
ada	crypto	2021	3	2021-03-31	1.29482	1.19274	1.0354	1.37679	1.16912	1.18047	0.341382	31	0	0.0613454	0.341557	1.172	0.219958	0.221632	0.221632	7.5407e+08	1.77846e+09	5.3908e+09	3.31015e+10	3.73913e+10	4.4043e+10	0	0	-0.0917561	-0.0962423	-0.281776	-0.437549	1.08907
ada	crypto	2021	4	2021-04-30	1.1846	1.35019	1.087	1.47688	1.25833	1.22598	0.389883	30	0	0.0444785	0.243619	0.849761	0.148245	0.26399	0.26399	5.97575e+08	1.72451e+09	4.54434e+09	3.48367e+10	4.0311e+10	4.73136e+10	0	0	0.132005	0.123991	0.508953	0.836393	0.647715
ada	crypto	2021	5	2021-05-31	1.35512	1.74219	1.28507	2.26163	1.65722	1.62098	0.976554	31	0	0.104029	0.57921	1.98747	0.392151	0.413841	0.413841	7.65426e+08	4.18162e+09	1.10158e+10	4.12007e+10	5.31919e+10	7.2607e+10	0	0	0.290332	0.2549	0.440081	0.650004	1.14465
ada	crypto	2021	6	2021-06-30	1.73843	1.38105	1.14212	1.84286	1.47768	1.47992	0.700736	30	0	0.0562401	0.30804	1.07447	0.253535	0.380245	0.495	7.05327e+08	1.5401e+09	3.18067e+09	3.67374e+10	4.75172e+10	5.9226e+10	0	0	-0.207292	-0.2323	-0.754123	-0.916243	1.48132
ada	crypto	2021	7	2021-07-31	1.33485	1.32861	1.05705	1.45972	1.28096	1.28112	0.402664	31	0	0.0324114	0.180459	0.619219	0.125493	0.27585	0.532613	3.05598e+08	6.85058e+08	1.68934e+09	3.40784e+10	4.12774e+10	4.70015e+10	0	0	-0.0379705	-0.0387102	-0.214509	-0.308464	1.41263
ada	crypto	2021	8	2021-08-31	1.31423	2.77976	1.31423	2.92741	2.11477	2.12613	1.61319	31	0	0.0610408	0.339861	1.16618	0.136721	0.122621	0.418902	5.94129e+08	2.78622e+09	6.00597e+09	4.2394e+10	6.83084e+10	9.45932e+10	0	0	1.09223	0.738228	2.17215	5.39954	2.86564
ada	crypto	2021	9	2021-09-30	2.86061	2.11103	1.97962	2.96548	2.43096	2.38431	0.985856	30	0	0.0507789	0.278127	0.970129	0.216246	0.332444	0.332444	1.09974e+09	2.73807e+09	7.38471e+09	6.40916e+10	7.86819e+10	9.59094e+10	0	0	-0.240569	-0.275185	-0.989421	-1.27256	2.91665
ada	crypto	2021	10	2021-10-31	2.24324	1.9678	1.92589	2.27366	2.15159	2.16308	0.347764	31	0	0.0292107	0.162638	0.558069	0.128176	0.152954	0.350563	7.71675e+08	1.29658e+09	2.97533e+09	6.30956e+10	6.98673e+10	7.36926e+10	0	0	-0.0678499	-0.0702615	-0.432011	-0.548164	3.10516
ada	crypto	2021	11	2021-11-30	1.94979	1.55695	1.54164	2.27977	1.88632	1.93459	0.738127	30	0	0.038812	0.212582	0.741502	0.177248	0.323773	0.480138	5.70808e+08	1.45209e+09	4.64876e+09	5.06096e+10	6.18744e+10	7.47385e+10	0	0	-0.208784	-0.234184	-1.10162	-1.32123	3.70185
ada	crypto	2021	12	2021-12-31	1.54729	1.31173	1.2214	1.7169	1.3669	1.35022	0.495501	31	0	0.0553145	0.307978	1.05678	0.229456	0.288603	0.588128	4.86648e+08	1.01455e+09	2.64111e+09	4.01519e+10	4.49301e+10	5.63864e+10	0	0	-0.157503	-0.171385	-0.556485	-0.74692	3.32523
ada	crypto	2022	1	2022-01-31	1.37118	1.05138	1.03943	1.57179	1.21657	1.20872	0.532351	31	0	0.0539896	0.300601	1.03147	0.224032	0.338692	0.649489	3.72859e+08	1.08436e+09	3.11799e+09	3.43021e+10	4.00973e+10	5.18146e+10	0	0	-0.198482	-0.221247	-0.736016	-0.987568	3.07843
ada	crypto	2022	2	2022-02-28	1.08566	0.956932	0.850559	1.19777	1.02667	1.04728	0.347207	28	0	0.0453268	0.239847	0.865967	0.165361	0.289879	0.71318	4.17504e+08	7.02636e+08	1.62887e+09	2.81051e+10	3.3906e+10	3.95413e+10	0	0	-0.0898289	-0.0941226	-0.392428	-0.569195	2.76822
ada	crypto	2022	3	2022-03-31	0.962436	1.14468	0.789166	1.19268	0.93949	0.878619	0.403515	31	0	0.0404296	0.225102	0.772406	0.127874	0.180032	0.733882	1.7901e+08	5.91502e+08	1.66405e+09	2.61156e+10	3.10952e+10	3.95037e+10	0	0	0.196194	0.179145	0.795838	1.40095	2.34436
ada	crypto	2022	4	2022-04-30	1.16473	0.75334	0.75334	1.2124	0.971616	0.94468	0.459061	30	0	0.0400079	0.219132	0.76435	0.216148	0.378638	0.745963	1.45192e+08	4.31162e+08	1.22509e+09	2.49952e+10	3.22118e+10	4.01645e+10	0	0	-0.341875	-0.41836	-1.90917	-1.93553	1.67261
ada	crypto	2022	5	2022-05-31	0.788773	0.630326	0.45427	0.895202	0.599857	0.542543	0.440932	31	0	0.0866689	0.482552	1.65581	0.362129	0.49255	0.846814	1.55245e+08	5.57078e+08	1.58529e+09	1.51664e+10	2.00066e+10	2.98528e+10	0	0	-0.163292	-0.17828	-0.369451	-0.49231	1.18794
ada	crypto	2022	6	2022-06-30	0.552506	0.451774	0.451774	0.642454	0.519794	0.494406	0.19068	30	0	0.05857	0.320801	1.11898	0.268443	0.2968	0.847656	1.98841e+08	5.65842e+08	1.2995e+09	1.51205e+10	1.7378e+10	2.1461e+10	0	0	-0.28327	-0.333055	-1.0382	-1.24069	0.916583
ada	crypto	2022	7	2022-07-31	0.450053	0.516901	0.419748	0.52748	0.476315	0.469532	0.107732	31	0	0.0387364	0.215675	0.740057	0.130448	0.122663	0.858455	1.4735e+08	3.77177e+08	7.53013e+08	1.40558e+10	1.5953e+10	1.76765e+10	0	0	0.144157	0.134669	0.624405	1.03236	1.25293
ada	crypto	2022	8	2022-08-31	0.512611	0.446595	0.430075	0.570998	0.49629	0.500487	0.140922	31	0	0.0381219	0.212254	0.728318	0.181073	0.2468	0.854973	1.55552e+08	2.99018e+08	6.05603e+08	1.44348e+10	1.66461e+10	1.91502e+10	0	0	-0.136014	-0.146199	-0.688795	-0.807405	1.37057
ada	crypto	2022	9	2022-09-30	0.457494	0.43394	0.43394	0.513206	0.466745	0.462992	0.0792656	30	0	0.0348267	0.190753	0.665362	0.146375	0.154452	0.853669	1.92771e+08	2.9989e+08	5.50341e+08	1.45912e+10	1.56834e+10	1.72413e+10	0	0	-0.0283356	-0.0287448	-0.150691	-0.196377	1.46375
ada	crypto	2022	10	2022-10-31	0.430472	0.406141	0.339494	0.435829	0.392522	0.402938	0.0963352	31	0	0.0319193	0.177719	0.609817	0.105839	0.221039	0.885518	8.68918e+07	2.18096e+08	6.90854e+08	1.1441e+10	1.32159e+10	1.46572e+10	0	0	-0.0640631	-0.0662072	-0.372539	-0.625549	1.33692
ada	crypto	2022	11	2022-11-30	0.401166	0.319363	0.304425	0.426827	0.344102	0.328139	0.122402	30	0	0.0519117	0.284332	0.991772	0.218047	0.286771	0.897344	6.95529e+07	2.4164e+08	8.58822e+08	1.02875e+10	1.16178e+10	1.43943e+10	0	0	-0.213663	-0.24037	-0.845383	-1.10238	1.11973
ada	crypto	2022	12	2022-12-31	0.314154	0.245857	0.243946	0.322566	0.283877	0.267201	0.0786194	31	0	0.0293904	0.163639	0.561503	0.159974	0.243731	0.917738	3.66261e+07	9.95241e+07	2.28635e+08	8.26139e+09	9.60634e+09	1.09094e+10	0	0	-0.230165	-0.261579	-1.59851	-1.63514	1.05253
ada	crypto	2023	1	2023-01-31	0.24951	0.390737	0.24951	0.396322	0.334341	0.346303	0.146812	31	0	0.0333766	0.185833	0.637659	0.0990972	0.070512	0.915862	5.91431e+07	2.00144e+08	5.38854e+08	8.45154e+09	1.13358e+10	1.34448e+10	0	0	0.589283	0.463283	2.49301	4.67504	1.02552
ada	crypto	2023	2	2023-02-28	0.397487	0.352012	0.352012	0.411967	0.384202	0.388548	0.0599543	28	0	0.0342739	0.181361	0.654803	0.132362	0.145532	0.881297	8.40763e+07	1.595e+08	2.72142e+08	1.19597e+10	1.30449e+10	1.39883e+10	0	0	-0.0991059	-0.104368	-0.57547	-0.788501	1.04217
ada	crypto	2023	3	2023-03-31	0.359936	0.399414	0.306504	0.399414	0.345712	0.344636	0.0929095	31	0	0.0415218	0.231184	0.793273	0.125206	0.148447	0.896643	6.26242e+07	1.85214e+08	4.32711e+08	1.04216e+10	1.17569e+10	1.35933e+10	0	0	0.134659	0.126332	0.546457	1.00899	1.48764
ada	crypto	2023	4	2023-04-30	0.393908	0.397991	0.381366	0.454313	0.403814	0.397479	0.0729469	30	0	0.0267642	0.146594	0.51133	0.109773	0.158354	0.871398	5.47851e+07	1.68781e+08	3.72281e+08	1.29806e+10	1.37538e+10	1.54739e+10	0	0	-0.00356175	-0.00356811	-0.0243401	-0.0325045	1.12392
ada	crypto	2023	5	2023-05-31	0.386749	0.374156	0.358299	0.394513	0.372885	0.370205	0.0362142	31	0	0.0190046	0.105813	0.363082	0.0779765	0.0917948	0.879177	3.66912e+07	7.8914e+07	1.57787e+08	1.22376e+10	1.27235e+10	1.34492e+10	0	0	-0.0598888	-0.0617571	-0.583644	-0.791995	0.788959
ada	crypto	2023	6	2023-06-30	0.364687	0.287142	0.260767	0.378182	0.297894	0.286608	0.117415	30	0	0.0393485	0.215521	0.751753	0.192448	0.310473	0.912066	3.29646e+07	1.35567e+08	6.49546e+08	8.91935e+09	1.01878e+10	1.29253e+10	0	0	-0.232561	-0.264696	-1.22817	-1.37542	0.560592
ada	crypto	2023	7	2023-07-31	0.291856	0.307358	0.280193	0.35503	0.304997	0.306693	0.074837	31	0	0.0449038	0.250014	0.857885	0.110893	0.144136	0.905515	4.97462e+07	1.19342e+08	5.56185e+08	9.59187e+09	1.04472e+10	1.2156e+10	0	0	0.0704052	0.0680373	0.272134	0.613538	0.330547
ada	crypto	2023	8	2023-08-31	0.309169	0.255087	0.255087	0.309169	0.278868	0.274211	0.0540817	31	0	0.0218975	0.12192	0.418352	0.107848	0.174926	0.913981	4.60078e+07	8.56405e+07	1.58837e+08	8.76771e+09	9.57583e+09	1.06013e+10	0	0	-0.170066	-0.186409	-1.52894	-1.72844	0.303935
ada	crypto	2023	9	2023-09-30	0.255214	0.253942	0.241452	0.257693	0.250427	0.250483	0.0162406	30	0	0.0125047	0.068491	0.238902	0.0507881	0.0630232	0.918579	1.82513e+07	4.46982e+07	8.54057e+07	8.30368e+09	8.61293e+09	8.85847e+09	0	0	-0.00449048	-0.00450059	-0.0657107	-0.0886151	0.394165
ada	crypto	2023	10	2023-10-31	0.266112	0.29252	0.243161	0.30273	0.263844	0.259254	0.059569	31	0	0.0202811	0.11292	0.38747	0.060393	0.0862462	0.918003	2.58088e+07	7.59978e+07	1.9281e+08	8.39851e+09	9.10483e+09	1.04632e+10	0	0	0.151919	0.141429	1.25247	2.34181	0.510616
ada	crypto	2023	11	2023-11-30	0.30716	0.375593	0.30716	0.394302	0.366924	0.376386	0.0871414	30	0	0.0325385	0.178221	0.621647	0.104035	0.0702238	0.896421	1.07035e+08	1.96831e+08	4.42445e+08	1.06181e+10	1.26957e+10	1.36485e+10	0	0	0.28399	0.249972	1.4026	2.40276	0.326355
ada	crypto	2023	12	2023-12-31	0.383572	0.592148	0.383572	0.664265	0.560274	0.593859	0.280694	31	0	0.0552029	0.307357	1.05465	0.136526	0.133946	0.870654	1.12319e+08	4.87191e+08	1.6126e+09	1.32812e+10	1.94177e+10	2.30183e+10	0	0	0.576569	0.455251	1.48118	3.33454	0.529458
ada	crypto	2024	1	2024-01-31	0.622638	0.498984	0.465819	0.622638	0.524009	0.521273	0.156819	31	0	0.0462918	0.257742	0.884403	0.179685	0.251862	0.84292	1.21224e+08	2.65606e+08	5.98138e+08	1.6177e+10	1.81891e+10	2.15994e+10	0	0	-0.157333	-0.171184	-0.664168	-0.952689	0.141255
ada	crypto	2024	2	2024-02-29	0.506008	0.657663	0.492592	0.657663	0.570302	0.583062	0.165071	29	0	0.0259014	0.139483	0.494845	0.0702243	0.0771552	0.833891	1.25653e+08	2.95111e+08	8.72268e+08	1.71152e+10	1.98288e+10	2.28821e+10	0	0	0.318005	0.276119	1.97958	3.93196	-0.225855
ada	crypto	2024	3	2024-03-31	0.71178	0.650223	0.585716	0.776831	0.690136	0.678595	0.191115	31	0	0.0518293	0.288573	0.990197	0.214691	0.246019	0.802489	1.54173e+08	4.9177e+08	1.24186e+09	2.04338e+10	2.40591e+10	2.70909e+10	0	0	-0.0113128	-0.0113772	-0.0394258	-0.0529934	-0.20086
ada	crypto	2024	4	2024-04-30	0.622392	0.440821	0.440821	0.622392	0.515048	0.499712	0.181571	30	0	0.0457973	0.250842	0.874957	0.229254	0.291731	0.851349	1.18288e+08	2.70931e+08	7.17422e+08	1.54022e+10	1.79859e+10	2.17244e+10	0	0	-0.322046	-0.388676	-1.54948	-1.69539	-0.341634
ada	crypto	2024	5	2024-05-31	0.449033	0.447004	0.427572	0.50077	0.459133	0.458277	0.0731979	31	0	0.0258991	0.1442	0.494803	0.0842942	0.108514	0.855817	7.31874e+07	1.68591e+08	2.92359e+08	1.49452e+10	1.60499e+10	1.75077e+10	0	0	0.0140267	0.0139292	0.0965961	0.165245	-0.399937
ada	crypto	2024	6	2024-06-30	0.450135	0.39241	0.376231	0.461326	0.414206	0.412595	0.0850944	30	0	0.0223823	0.122593	0.427613	0.100014	0.184456	0.87313	7.17438e+07	1.69156e+08	3.85117e+08	1.31742e+10	1.44988e+10	1.61388e+10	0	0	-0.122133	-0.130261	-1.06255	-1.30242	-0.375819
ada	crypto	2024	7	2024-07-31	0.402593	0.388794	0.347716	0.446604	0.40702	0.407084	0.0988876	31	0	0.0402903	0.224327	0.769746	0.161953	0.167559	0.882745	1.11321e+08	1.73369e+08	4.00197e+08	1.21821e+10	1.42956e+10	1.56989e+10	0	0	-0.00921478	-0.0092575	-0.0412679	-0.0571615	-0.368703
ada	crypto	2024	8	2024-08-31	0.392019	0.344924	0.314547	0.393732	0.35037	0.345803	0.079185	31	0	0.0386116	0.21498	0.737673	0.163827	0.197623	0.893931	5.93754e+07	1.46643e+08	6.25778e+08	1.10625e+10	1.23315e+10	1.38672e+10	0	0	-0.112838	-0.119727	-0.556923	-0.730818	-0.549857
ada	crypto	2024	9	2024-09-30	0.331383	0.373565	0.314349	0.402086	0.352843	0.351271	0.0877372	30	0	0.0303231	0.166086	0.579321	0.113384	0.0853036	0.893997	7.2117e+07	1.18324e+08	1.68388e+08	1.10772e+10	1.24388e+10	1.41816e+10	0	0	0.0830373	0.0797694	0.480289	0.703533	-0.496388
ada	crypto	2024	10	2024-10-31	0.351993	0.342065	0.323703	0.364638	0.349246	0.350471	0.0409351	31	0	0.0274801	0.153003	0.525007	0.119983	0.112262	0.890843	6.30595e+07	1.15898e+08	2.06552e+08	1.14283e+10	1.23261e+10	1.2871e+10	0	0	-0.0843222	-0.0880907	-0.575746	-0.734195	-0.504998
ada	crypto	2024	11	2024-11-30	0.356786	1.07924	0.325854	1.07924	0.692288	0.700101	0.753381	30	0	0.0718079	0.393308	1.37189	0.130302	0.111736	0.890117	1.01352e+08	1.18226e+09	3.24719e+09	1.1509e+10	2.44853e+10	3.821e+10	0	0	2.15506	1.14901	2.92139	8.81803	-0.136556
ada	crypto	2024	12	2024-12-31	1.14889	0.842954	0.842954	1.23108	1.02355	1.02079	0.388125	31	0	0.0513624	0.285974	0.981277	0.240245	0.315272	0.715745	2.19217e+08	9.81549e+08	3.28128e+09	2.98937e+10	3.62712e+10	4.36098e+10	0	0	-0.218934	-0.247096	-0.864052	-1.02852	-0.16866
ada	crypto	2025	1	2025-01-31	0.915814	0.942272	0.905594	1.1363	0.99659	0.98153	0.230711	31	0	0.0499154	0.277917	0.953633	0.172591	0.195999	0.694621	2.61303e+08	7.3064e+08	1.6713e+09	3.21276e+10	3.53654e+10	4.03236e+10	0	0	0.117822	0.111382	0.400773	0.645349	-0.0456708
ada	crypto	2025	2	2025-02-28	0.896354	0.632723	0.632723	0.896354	0.748121	0.765141	0.263631	28	0	0.0495725	0.262313	0.947082	0.235065	0.294115	0.786637	2.08041e+08	5.50578e+08	2.64722e+09	2.24813e+10	2.65737e+10	3.18289e+10	0	0	-0.328514	-0.398261	-1.51827	-1.69426	-0.164049
ada	crypto	2025	3	2025-03-31	0.658728	0.660804	0.658728	1.11499	0.756758	0.722748	0.456259	31	0	0.117663	0.655117	2.24794	0.33808	0.408524	0.777868	1.93163e+08	9.8943e+08	4.77881e+09	2.34062e+10	2.69076e+10	3.96226e+10	1	0	0.0443815	0.0434249	0.0662856	0.128445	-0.213124
ada	crypto	2025	4	2025-04-30	0.678348	0.682359	0.557418	0.721223	0.647851	0.638975	0.163805	30	0	0.0463141	0.253673	0.88483	0.173147	0.178271	0.812031	1.42518e+08	3.83469e+08	9.3378e+08	1.9843e+10	2.30681e+10	2.56879e+10	0	0	0.0326191	0.0320984	0.126535	0.185383	-0.0481694
ada	crypto	2025	5	2025-05-31	0.705553	0.686603	0.66413	0.839622	0.745981	0.748465	0.175492	31	0	0.0395821	0.220384	0.756214	0.134261	0.182248	0.776046	2.62358e+08	4.85748e+08	1.19833e+09	2.36619e+10	2.65878e+10	2.99184e+10	0	0	0.00621945	0.00620019	0.0281336	0.0461801	0.0474074
ada	crypto	2025	6	2025-06-30	0.685522	0.572654	0.540711	0.71627	0.623816	0.626388	0.175559	30	0	0.0309689	0.169624	0.59166	0.131301	0.245102	0.817665	1.48184e+08	3.02339e+08	5.7158e+08	1.92974e+10	2.22563e+10	2.55483e+10	0	0	-0.16596	-0.181474	-1.06986	-1.38212	0.156839
ada	crypto	2025	7	2025-07-31	0.541557	0.740471	0.541557	0.902572	0.72962	0.746405	0.361015	31	0	0.0405846	0.225966	0.775368	0.139754	0.179599	0.817379	1.23302e+08	6.42313e+08	1.5548e+09	1.93341e+10	2.60613e+10	3.22452e+10	0	0	0.29305	0.257004	1.13736	1.83897	0.242741
ada	crypto	2025	8	2025-08-31	0.713704	0.812473	0.696647	0.963326	0.837434	0.841113	0.266679	31	0	0.0445272	0.247917	0.850691	0.160004	0.156596	0.765081	2.74816e+08	8.56541e+08	3.41844e+09	2.4896e+10	3.01105e+10	3.46962e+10	0	0	0.0972384	0.0927964	0.374305	0.579964	0.460043
ada	crypto	2025	9	2025-09-30	0.797672	0.805689	0.763742	0.929413	0.848771	0.83691	0.165671	30	0	0.0293895	0.160973	0.561486	0.12371	0.178254	0.742456	1.71245e+08	4.93865e+08	8.89483e+08	2.75951e+10	3.06463e+10	3.35588e+10	0	0	-0.00834902	-0.00838407	-0.0520837	-0.0677722	0.477367
ada	crypto	2025	10	2025-10-31	0.848479	0.609138	0.599386	0.872252	0.708737	0.663855	0.272867	31	0	0.0570681	0.317742	1.09028	0.279487	0.31283	0.797879	1.58218e+08	5.5135e+08	1.76473e+09	2.1684e+10	2.5627e+10	3.15285e+10	0	0	-0.243954	-0.279653	-0.880127	-1.0006	0.30147
ada	crypto	2025	11	2025-11-30	0.611544	0.417845	0.404945	0.611544	0.494565	0.491306	0.206599	30	0	0.0399271	0.21869	0.762807	0.191019	0.337832	0.863447	1.13177e+08	3.37956e+08	7.99395e+08	1.46632e+10	1.79019e+10	2.21262e+10	0	0	-0.314038	-0.376934	-1.7236	-1.97328	0.152946
ada	crypto	2025	12	2025-12-31	0.386306	0.332679	0.332679	0.469382	0.39079	0.38517	0.136703	31	0	0.0446397	0.248543	0.852841	0.17306	0.291241	0.887816	8.68858e+07	2.21486e+08	5.20134e+08	1.20648e+10	1.41614e+10	1.70043e+10	0	0	-0.203823	-0.227934	-0.917078	-1.31708	0.15333
ada	crypto	2026	1	2026-01-31	0.356429	0.292893	0.292893	0.42261	0.376052	0.386208	0.129717	31	0	0.0444501	0.247488	0.849218	0.171129	0.306943	0.901233	5.54392e+07	2.278e+08	5.66554e+08	1.06536e+10	1.36584e+10	1.53287e+10	0	0	-0.119593	-0.127371	-0.514658	-0.744301	-0.125726
ada	crypto	2026	2	2026-02-28	0.286295	0.281408	0.247615	0.298994	0.27649	0.277008	0.0513797	28	0	0.0535358	0.283285	1.0228	0.181452	0.171842	0.916501	7.44095e+07	2.27776e+08	7.07243e+08	9.00797e+09	1.00604e+10	1.0876e+10	0	0	-0.0392126	-0.0400021	-0.141208	-0.220455	-0.0972667
ada	crypto	2026	3	2026-03-31	0.273601	0.241252	0.2394	0.290483	0.262332	0.26288	0.0510833	31	0	0.0312357	0.173913	0.596757	0.13325	0.175856	0.919271	7.60949e+07	1.58281e+08	3.56576e+08	8.71929e+09	9.55188e+09	1.05768e+10	0	0	-0.142694	-0.15396	-0.88527	-1.15542	-0.199224
ada	crypto	2026	4	2026-04-30	0.247891	0.245992	0.236237	0.264633	0.248821	0.248665	0.0283964	30	0	0.0296702	0.16251	0.566848	0.107912	0.107305	0.920338	6.09973e+07	1.26488e+08	1.96238e+08	8.6188e+09	9.07663e+09	9.64086e+09	0	0	0.0196445	0.019454	0.119709	0.180276	-0.190838
algo	crypto	2019	6	2019-06-30	2.21398	1.42503	1.3985	2.21398	1.60421	1.49614	0.815481	9	0	0.13095	0.370383	2.5018	0.3619	0.368333	0.368333	1.55156e+07	4.60075e+07	9.89683e+07	1.3985e+10	1.60421e+10	2.21398e+10	0	0
algo	crypto	2019	7	2019-07-31	1.33958	0.562659	0.562659	1.33958	0.81509	0.712644	0.776917	31	0	0.0793387	0.441739	1.51576	0.42913	0.579972	0.74586	4.07664e+06	1.05492e+07	2.56275e+07	5.62659e+09	8.1509e+09	1.33958e+10	0	0	-0.605159	-0.929271	-2.10366	-2.16548
algo	crypto	2019	8	2019-08-31	0.554218	0.409136	0.397904	0.818759	0.647241	0.679265	0.420856	31	0	0.0926289	0.515736	1.76967	0.304969	0.514016	0.820277	4.12446e+06	1.49728e+07	1.12651e+08	3.97904e+09	6.47241e+09	8.18759e+09	0	0	-0.272852	-0.318626	-0.617808	-1.04478
algo	crypto	2019	9	2019-09-30	0.391806	0.253687	0.189385	0.391806	0.310555	0.321469	0.202422	30	0	0.0830667	0.454975	1.58699	0.39414	0.516637	0.91446	1.88204e+06	6.01878e+06	1.64123e+07	1.89385e+09	3.10555e+09	3.91806e+09	0	0	-0.379945	-0.477947	-1.05049	-1.21263
algo	crypto	2019	10	2019-10-31	0.233343	0.218706	0.199855	0.266692	0.229134	0.227128	0.0668377	31	0	0.0456304	0.25406	0.871768	0.201402	0.250617	0.90973	1.47614e+06	4.62956e+06	1.28327e+07	1.99855e+09	2.29134e+09	2.66692e+09	0	0	-0.137893	-0.148376	-0.584019	-0.736715
algo	crypto	2019	11	2019-11-30	0.262318	0.265558	0.205252	0.287671	0.257592	0.263941	0.0824196	30	0	0.0738373	0.404424	1.41066	0.20737	0.286506	0.907293	1.89542e+06	6.51139e+06	2.5457e+07	2.05252e+09	2.57592e+09	2.87671e+09	0	0	0.214225	0.194106	0.479958	0.936039
algo	crypto	2019	12	2019-12-31	0.267235	0.215459	0.215459	0.297714	0.253373	0.248745	0.0822553	31	0	0.0523034	0.291213	0.999255	0.228985	0.27629	0.902683	1.24413e+06	4.77262e+06	1.94674e+07	2.15459e+09	2.53373e+09	2.97714e+09	0	0	-0.188657	-0.209064	-0.717906	-0.913004
algo	crypto	2020	1	2020-01-31	0.21922	0.24757	0.212544	0.260616	0.235624	0.234221	0.0480721	31	0	0.0349323	0.194495	0.66738	0.117539	0.111786	0.903999	1.23784e+06	3.39931e+06	1.07034e+07	2.12544e+09	2.35624e+09	2.60616e+09	0	0	0.149038	0.138925	0.714286	1.18195
algo	crypto	2020	2	2020-02-29	0.24712	0.331884	0.24712	0.4904	0.351762	0.352258	0.24328	29	0	0.0759863	0.409199	1.45172	0.277652	0.323238	0.888382	4.54457e+06	2.47304e+07	5.88919e+07	2.4712e+09	3.51762e+09	4.904e+09	0	0	0.340566	0.293092	0.716258	1.05561
algo	crypto	2020	3	2020-03-31	0.318912	0.15452	0.125949	0.395093	0.215544	0.157694	0.269144	31	0	0.13359	0.743799	2.55224	0.688008	0.681217	0.943112	3.15561e+06	1.35526e+07	3.06303e+07	1.25949e+09	2.15544e+09	3.95093e+09	0	0	-0.534415	-0.76446	-1.02778	-1.11112
algo	crypto	2020	4	2020-04-30	0.154824	0.211344	0.154824	0.230605	0.18932	0.186512	0.075781	30	0	0.055034	0.301434	1.05142	0.186981	0.175605	0.93007	3.52395e+06	8.46161e+06	1.8632e+07	1.54824e+09	1.8932e+09	2.30605e+09	0	0	0.367743	0.313162	1.03891	1.67483
algo	crypto	2020	5	2020-05-31	0.214344	0.231693	0.18593	0.242402	0.207566	0.204639	0.0564718	31	0	0.0421492	0.234677	0.80526	0.172093	0.152344	0.91602	5.16544e+06	9.40629e+06	2.15132e+07	1.8593e+09	2.07566e+09	2.42402e+09	0	0	0.0962837	0.091926	0.391713	0.534165
algo	crypto	2020	6	2020-06-30	0.250022	0.208441	0.204138	0.250022	0.233257	0.234251	0.0458843	30	0	0.0349783	0.191584	0.66826	0.147392	0.183521	0.907796	2.64534e+06	7.68412e+06	1.91325e+07	2.04138e+09	2.33257e+09	2.50022e+09	0	0	-0.100359	-0.105759	-0.552025	-0.717538
algo	crypto	2020	7	2020-07-31	0.214463	0.328781	0.204328	0.389199	0.290317	0.288527	0.184871	31	0	0.0621593	0.346088	1.18755	0.171521	0.258706	0.90771	3.631e+06	2.8793e+07	1.21437e+08	2.04328e+09	2.90317e+09	3.89199e+09	0	0	0.577339	0.455739	1.31683	2.65705
algo	crypto	2020	8	2020-08-31	0.329086	0.505774	0.302515	0.665393	0.505852	0.532447	0.362878	31	0	0.0887132	0.493934	1.69486	0.261595	0.239887	0.863361	1.4602e+07	8.79036e+07	2.66767e+08	3.02515e+09	5.05852e+09	6.65393e+09	0	0	0.53833	0.430698	0.871974	1.64643
algo	crypto	2020	9	2020-09-30	0.519549	0.345034	0.270212	0.519549	0.358408	0.350975	0.249338	30	0	0.083471	0.457189	1.59471	0.381191	0.479911	0.877952	1.58263e+07	4.07893e+07	1.00193e+08	2.70212e+09	3.58408e+09	5.19549e+09	0	0	-0.31781	-0.382447	-0.836517	-1.00329
algo	crypto	2020	10	2020-10-31	0.334357	0.249452	0.249452	0.345674	0.306084	0.309277	0.0962224	31	0	0.0407901	0.227109	0.779293	0.188658	0.278362	0.887329	7.83462e+06	1.97345e+07	4.2168e+07	2.49452e+09	3.06084e+09	3.45674e+09	0	0	-0.277023	-0.324378	-1.42829	-1.7194
algo	crypto	2020	11	2020-11-30	0.257951	0.329239	0.233287	0.35583	0.282992	0.27551	0.122543	30	0	0.0598829	0.327992	1.14406	0.200675	0.159291	0.89463	9.00512e+06	3.33092e+07	1.16743e+08	2.33287e+09	2.82992e+09	3.5583e+09	0	0	0.31985	0.277518	0.846112	1.38292
algo	crypto	2020	12	2020-12-31	0.309567	0.329904	0.290069	0.355849	0.324745	0.328744	0.0657796	31	0	0.0506178	0.281828	0.967051	0.201997	0.175734	0.868983	1.4338e+07	3.94553e+07	7.01934e+07	2.90069e+09	3.24745e+09	3.55849e+09	0	0	0.00202	0.00201796	0.00716027	0.00999009
algo	crypto	2021	1	2021-01-31	0.399611	0.64881	0.395003	0.656621	0.507585	0.510182	0.261618	31	0	0.0835472	0.465171	1.59617	0.262324	0.228017	0.821587	5.05488e+07	1.22248e+08	2.24296e+08	3.95003e+09	5.07585e+09	6.56621e+09	0	0	0.966664	0.676339	1.45396	2.57826
algo	crypto	2021	2	2021-02-28	0.644515	1.03169	0.644515	1.69638	1.11117	1.04682	1.05187	28	0	0.102351	0.541589	1.95541	0.269812	0.42935	0.708888	9.49941e+07	3.52773e+08	9.82453e+08	6.44515e+09	1.11117e+10	1.69638e+10	0	0	0.590123	0.463811	0.85639	1.71902
algo	crypto	2021	3	2021-03-31	1.08548	1.35582	1.03833	1.41482	1.16299	1.15097	0.376484	31	0	0.0528899	0.294479	1.01046	0.168457	0.191952	0.531009	1.13118e+08	2.40395e+08	7.48613e+08	1.03833e+10	1.16299e+10	1.41482e+10	0	0	0.314174	0.273209	0.927771	1.62183
algo	crypto	2021	4	2021-04-30	1.32755	1.39763	1.09663	1.69165	1.35325	1.33635	0.595016	30	0	0.0604988	0.331366	1.15583	0.232339	0.351737	0.504677	1.1709e+08	2.58278e+08	6.40386e+08	1.09663e+10	1.35325e+10	1.69165e+10	0	0	0.0308404	0.0303744	0.0916643	0.130733
algo	crypto	2021	5	2021-05-31	1.39479	0.933496	0.823363	1.57193	1.21987	1.32104	0.748568	31	0	0.0991551	0.552072	1.89435	0.461526	0.476209	0.628107	7.90162e+07	2.44011e+08	5.48886e+08	8.23363e+09	1.21987e+10	1.57193e+10	0	0	-0.332087	-0.403598	-0.73106	-0.874485
algo	crypto	2021	6	2021-06-30	0.897334	0.881548	0.742103	1.11199	0.943231	0.964974	0.369883	30	0	0.0687529	0.376575	1.31352	0.278275	0.332633	0.66481	5.68373e+07	1.06095e+08	2.86509e+08	7.42103e+09	9.43231e+09	1.11199e+10	0	0	-0.0556492	-0.0572576	-0.152048	-0.205759
algo	crypto	2021	7	2021-07-31	0.83732	0.845449	0.697162	0.91112	0.84269	0.848837	0.213958	31	0	0.0379087	0.211066	0.724244	0.146077	0.23483	0.685109	2.8312e+07	4.74285e+07	1.07193e+08	6.97162e+09	8.4269e+09	9.1112e+09	0	0	-0.0409494	-0.0418115	-0.198096	-0.28623
algo	crypto	2021	8	2021-08-31	0.81635	1.10973	0.81635	1.15934	0.964064	0.947996	0.342987	31	0	0.0484127	0.26955	0.924923	0.159244	0.136329	0.631274	4.22172e+07	1.40687e+08	3.00885e+08	8.1635e+09	9.64064e+09	1.15934e+10	0	0	0.312592	0.272003	1.0091	1.7081
algo	crypto	2021	9	2021-09-30	1.15692	1.61822	1.14449	2.39514	1.74618	1.76499	1.25065	30	0	0.117863	0.645562	2.25177	0.340695	0.34445	0.483061	1.34103e+08	8.89434e+08	3.89626e+09	1.14449e+10	1.74618e+10	2.39514e+10	0	0	0.458214	0.377212	0.584315	1.10718
algo	crypto	2021	10	2021-10-31	1.76337	1.82915	1.70691	2.04097	1.83576	1.81589	0.334059	31	0	0.0483634	0.269276	0.923982	0.166152	0.140927	0.287347	1.52525e+08	3.47968e+08	9.16928e+08	1.70691e+10	1.83576e+10	2.04097e+10	0	0	0.130345	0.122522	0.455007	0.737411
algo	crypto	2021	11	2021-11-30	1.83373	1.8236	1.60602	2.14402	1.85318	1.84127	0.538	30	0	0.0524278	0.287159	1.00163	0.206583	0.25093	0.329467	1.1574e+08	5.31898e+08	4.6478e+09	1.60602e+10	1.85318e+10	2.14402e+10	0	0	-0.00303336	-0.00303797	-0.0105794	-0.0147058
algo	crypto	2021	12	2021-12-31	1.95799	1.66865	1.30315	1.95799	1.55795	1.56262	0.654836	31	0	0.0571205	0.318033	1.09128	0.247389	0.334443	0.455919	9.26917e+07	2.88544e+08	7.33925e+08	1.30315e+10	1.55795e+10	1.95799e+10	0	0	-0.0849704	-0.0887988	-0.279212	-0.358944
algo	crypto	2022	1	2022-01-31	1.73824	0.954635	0.920762	1.78848	1.2815	1.36173	0.867723	31	0	0.0496656	0.276526	0.94886	0.265048	0.485172	0.615571	1.26782e+08	2.68816e+08	5.59769e+08	9.20762e+09	1.2815e+10	1.78848e+10	0	0	-0.427899	-0.55844	-2.01948	-2.10694
algo	crypto	2022	2	2022-02-28	0.967723	0.863279	0.774153	1.07267	0.914388	0.907953	0.298519	28	0	0.0479026	0.253477	0.915177	0.189657	0.278295	0.676782	6.58113e+07	1.4711e+08	3.02773e+08	7.74153e+09	9.14388e+09	1.07267e+10	0	0	-0.0956966	-0.10059	-0.396843	-0.53038
algo	crypto	2022	3	2022-03-31	0.854621	0.928563	0.682102	0.94693	0.80036	0.767748	0.264829	31	0	0.0334175	0.186061	0.638441	0.114945	0.201867	0.715215	4.16758e+07	1.33907e+08	2.61092e+08	6.82102e+09	8.0036e+09	9.4693e+09	0	0	0.0756232	0.0729002	0.391808	0.634219
algo	crypto	2022	4	2022-04-30	0.93794	0.565663	0.565663	0.93794	0.749307	0.737851	0.372277	30	0	0.0458406	0.251079	0.875783	0.241129	0.396909	0.763829	4.00956e+07	9.71739e+07	1.90445e+08	5.65663e+09	7.49307e+09	9.3794e+09	0	0	-0.390819	-0.49564	-1.97404	-2.0555
algo	crypto	2022	5	2022-05-31	0.601795	0.412347	0.358817	0.75427	0.501048	0.444969	0.395454	31	0	0.08681	0.483338	1.6585	0.413827	0.524286	0.85019	5.11313e+07	1.8463e+08	5.8097e+08	3.58817e+09	5.01048e+09	7.5427e+09	0	0	-0.271037	-0.316133	-0.654062	-0.763926
algo	crypto	2022	6	2022-06-30	0.385202	0.309968	0.295578	0.418187	0.345398	0.334813	0.122609	30	0	0.0537024	0.29414	1.02598	0.240723	0.293192	0.876593	3.37055e+07	6.45707e+07	1.49176e+08	2.95578e+09	3.45398e+09	4.18187e+09	0	0	-0.248283	-0.285396	-0.970272	-1.18558	-0.447076
algo	crypto	2022	7	2022-07-31	0.306257	0.335321	0.294499	0.371816	0.326143	0.327153	0.0773176	31	0	0.035191	0.195935	0.672323	0.136186	0.165129	0.877044	2.9166e+07	5.08179e+07	9.69786e+07	2.94499e+09	3.26143e+09	3.71816e+09	0	0	0.0817907	0.0786177	0.401243	0.577281	-0.190799
algo	crypto	2022	8	2022-08-31	0.341414	0.288343	0.282043	0.368417	0.328058	0.332003	0.0863748	31	0	0.034616	0.192734	0.661337	0.154584	0.234448	0.882244	2.42306e+07	5.21184e+07	9.0459e+07	2.82043e+09	3.28058e+09	3.68417e+09	0	0	-0.140099	-0.150938	-0.783141	-0.976414	-0.13069
algo	crypto	2022	9	2022-09-30	0.293093	0.352457	0.286052	0.401764	0.326498	0.320117	0.115712	30	0	0.0450211	0.246591	0.860128	0.152797	0.128654	0.88057	2.26953e+07	9.85968e+07	3.37787e+08	2.86052e+09	3.26498e+09	4.01764e+09	0	0	0.222355	0.200779	0.814221	1.31403	0.13752
algo	crypto	2022	10	2022-10-31	0.355062	0.358643	0.306465	0.358643	0.331444	0.330416	0.0521777	31	0	0.0242051	0.134768	0.462438	0.0918331	0.142358	0.872047	1.91613e+07	5.77218e+07	1.49412e+08	3.06465e+09	3.31444e+09	3.58643e+09	0	0	0.0175502	0.017398	0.129095	0.189452	0.212778
algo	crypto	2022	11	2022-11-30	0.359818	0.248257	0.235907	0.423618	0.295022	0.270048	0.187711	30	0	0.0863408	0.472908	1.64954	0.389254	0.443113	0.901506	2.96382e+07	1.4369e+08	4.88148e+08	2.35907e+09	2.95022e+09	4.23618e+09	0	0	-0.307788	-0.367863	-0.777874	-0.945047	-0.025693
algo	crypto	2022	12	2022-12-31	0.240261	0.172037	0.164521	0.243945	0.200086	0.194402	0.0794234	31	0	0.035781	0.19922	0.683595	0.189825	0.325579	0.93131	1.07772e+07	2.98635e+07	6.96527e+07	1.64521e+09	2.00086e+09	2.43945e+09	0	0	-0.30702	-0.366755	-1.84095	-1.93206	-0.0797783
algo	crypto	2023	1	2023-01-31	0.176859	0.241725	0.176859	0.261328	0.220874	0.229107	0.0844693	31	0	0.0377069	0.209943	0.72039	0.145723	0.124436	0.926159	2.0535e+07	4.55284e+07	9.56526e+07	1.76859e+09	2.20874e+09	2.61328e+09	0	0	0.405078	0.340093	1.61993	2.33382	-0.00875575
algo	crypto	2023	2	2023-02-28	0.250571	0.2441	0.243467	0.28953	0.262309	0.256539	0.0460633	28	0	0.0452263	0.239315	0.864048	0.172672	0.159097	0.89835	1.71331e+07	5.62242e+07	1.27538e+08	2.43467e+09	2.62309e+09	2.8953e+09	0	0	0.00982271	0.00977478	0.0408448	0.056609	-0.107439
algo	crypto	2023	3	2023-03-31	0.250294	0.22552	0.188371	0.250294	0.21568	0.215283	0.0619224	31	0	0.0527278	0.293576	1.00736	0.191149	0.247399	0.921353	1.50293e+07	4.7517e+07	1.88737e+08	1.88371e+09	2.1568e+09	2.50294e+09	0	0	-0.0761166	-0.0791694	-0.269673	-0.414177	0.148257
algo	crypto	2023	4	2023-04-30	0.222952	0.181103	0.180761	0.23419	0.207145	0.215993	0.0534293	30	0	0.029998	0.164306	0.573111	0.153206	0.228145	0.92453	1.43692e+07	3.44923e+07	8.23131e+07	1.80761e+09	2.07145e+09	2.3419e+09	0	0	-0.196954	-0.219343	-1.33497	-1.43169	-0.0553807
algo	crypto	2023	5	2023-05-31	0.177218	0.147717	0.147717	0.18188	0.164404	0.164527	0.0341632	31	0	0.0225853	0.12575	0.431492	0.116923	0.187834	0.938327	9.407e+06	1.8248e+07	3.53721e+07	1.47717e+09	1.64404e+09	1.8188e+09	0	0	-0.184348	-0.203768	-1.62042	-1.74275	-0.151565
algo	crypto	2023	6	2023-06-30	0.148173	0.121551	0.110612	0.152152	0.126113	0.123637	0.0415401	30	0	0.0420334	0.230227	0.803048	0.19794	0.273018	0.953818	8.01338e+06	2.15924e+07	6.42954e+07	1.10612e+09	1.26113e+09	1.52152e+09	0	0	-0.177131	-0.194958	-0.846811	-0.984939	-0.176252
algo	crypto	2023	7	2023-07-31	0.12709	0.109865	0.105966	0.128172	0.114511	0.1135	0.0222062	31	0	0.0370534	0.206305	0.707904	0.13499	0.173252	0.955758	1.21891e+07	3.00385e+07	9.17924e+07	1.05966e+09	1.14511e+09	1.28172e+09	0	0	-0.0961452	-0.101087	-0.489987	-0.748842	-0.325626
algo	crypto	2023	8	2023-08-31	0.110536	0.0931714	0.0931714	0.116788	0.103654	0.102265	0.0236161	31	0	0.0281514	0.156741	0.537833	0.140573	0.202214	0.9611	6.53633e+06	1.96205e+07	5.30137e+07	9.31714e+08	1.03654e+09	1.16788e+09	0	0	-0.151945	-0.16481	-1.05148	-1.17242	-0.454137
algo	crypto	2023	9	2023-09-30	0.0920031	0.103282	0.0884755	0.103282	0.0959766	0.0958706	0.0148062	30	0	0.0231916	0.127025	0.443074	0.0792858	0.0933429	0.96306	6.47445e+06	1.15907e+07	2.156e+07	8.84755e+08	9.59766e+08	1.03282e+09	0	0	0.108513	0.103019	0.811012	1.29934	-0.348828
algo	crypto	2023	10	2023-10-31	0.10624	0.109369	0.0895302	0.112129	0.0984205	0.0992286	0.0225984	31	0	0.024445	0.136104	0.467022	0.08843	0.15728	0.96262	9.83179e+06	2.17812e+07	5.06354e+07	8.95302e+08	9.84205e+08	1.12129e+09	0	0	0.0589415	0.0572698	0.420779	0.647628	-0.253208
algo	crypto	2023	11	2023-11-30	0.114204	0.1335	0.111332	0.145315	0.13023	0.132643	0.0339827	30	0	0.0491714	0.269323	0.939417	0.178885	0.141385	0.953517	2.3605e+07	4.43494e+07	1.09667e+08	1.11332e+09	1.3023e+09	1.45315e+09	0	0	0.220639	0.199375	0.740283	1.11454	-0.273789
algo	crypto	2023	12	2023-12-31	0.13903	0.222623	0.13903	0.240413	0.198838	0.199304	0.101383	31	0	0.0469692	0.261513	0.897345	0.123587	0.118888	0.941953	3.73456e+07	9.51693e+07	2.61005e+08	1.3903e+09	1.98838e+09	2.40413e+09	0	0	0.667581	0.511374	1.95544	4.13775	-0.129471
algo	crypto	2024	1	2024-01-31	0.238915	0.159257	0.159162	0.238915	0.183459	0.184156	0.0797532	31	0	0.0468881	0.261062	0.895796	0.210196	0.333814	0.933548	1.79697e+07	4.54432e+07	1.22189e+08	1.59162e+09	1.83459e+09	2.38915e+09	0	0	-0.284633	-0.334959	-1.28306	-1.59356	-0.393942
algo	crypto	2024	2	2024-02-29	0.158576	0.21155	0.158576	0.211865	0.184591	0.185468	0.0532887	29	0	0.0273552	0.147312	0.52262	0.0806776	0.0862646	0.933793	1.51507e+07	3.81411e+07	1.06621e+08	1.58576e+09	1.84591e+09	2.11865e+09	0	0	0.328357	0.283943	1.92749	3.51947	-0.432334
algo	crypto	2024	3	2024-03-31	0.226803	0.267381	0.226803	0.31799	0.265868	0.26659	0.0911879	31	0	0.060878	0.338955	1.16307	0.21463	0.279931	0.905307	2.78758e+07	1.14823e+08	2.78173e+08	2.26803e+09	2.65868e+09	3.1799e+09	0	0	0.263912	0.234212	0.690982	1.09123	-0.440359
algo	crypto	2024	4	2024-04-30	0.251952	0.177995	0.168637	0.251952	0.204537	0.197107	0.0833152	30	0	0.0561309	0.307442	1.07238	0.266382	0.330678	0.929592	1.78737e+07	7.57383e+07	5.54188e+08	1.68637e+09	2.04537e+09	2.51952e+09	0	0	-0.334304	-0.406922	-1.32357	-1.52759	-0.523548
algo	crypto	2024	5	2024-05-31	0.180563	0.188148	0.171153	0.196713	0.185925	0.187852	0.0255601	31	0	0.030966	0.172411	0.591604	0.103259	0.129936	0.928542	1.57688e+07	3.47799e+07	8.09995e+07	1.71153e+09	1.85925e+09	1.96713e+09	0	0	0.0570463	0.0554785	0.32178	0.537276	-0.43589
algo	crypto	2024	6	2024-06-30	0.18821	0.144074	0.132296	0.188481	0.15585	0.15171	0.0561846	30	0	0.0339454	0.185926	0.648525	0.166802	0.298091	0.944765	8.72025e+06	2.39293e+07	6.56388e+07	1.32296e+09	1.5585e+09	1.88481e+09	0	0	-0.234254	-0.266905	-1.43554	-1.60013	-0.477588
algo	crypto	2024	7	2024-07-31	0.146563	0.135878	0.126815	0.159448	0.143824	0.142462	0.032633	31	0	0.03812	0.212243	0.728281	0.158863	0.152006	0.947053	9.68552e+06	1.94259e+07	6.83869e+07	1.26815e+09	1.43824e+09	1.59448e+09	0	0	-0.0568888	-0.0585711	-0.275962	-0.368689	-0.480798
algo	crypto	2024	8	2024-08-31	0.134809	0.12337	0.109888	0.146179	0.12447	0.122225	0.0362914	31	0	0.039484	0.219838	0.754341	0.154734	0.184865	0.954121	7.30815e+06	1.8499e+07	1.08237e+08	1.09888e+09	1.2447e+09	1.46179e+09	0	0	-0.0920545	-0.096571	-0.439283	-0.62411	-0.547028
algo	crypto	2024	9	2024-09-30	0.118413	0.134332	0.115682	0.144255	0.129718	0.129628	0.0285734	30	0	0.0303632	0.166306	0.580088	0.110261	0.0793874	0.951702	7.53673e+06	1.26025e+07	1.93178e+07	1.15682e+09	1.29718e+09	1.44255e+09	0	0	0.0888594	0.0851308	0.511892	0.772082	-0.59403
algo	crypto	2024	10	2024-10-31	0.124652	0.11444	0.113681	0.13025	0.121883	0.121899	0.0165695	31	0	0.0315577	0.175706	0.602908	0.140957	0.127213	0.952537	6.40032e+06	1.15372e+07	2.3101e+07	1.13681e+09	1.21883e+09	1.3025e+09	0	0	-0.14808	-0.160262	-0.912107	-1.13696	-0.635377
algo	crypto	2024	11	2024-11-30	0.114354	0.44057	0.108764	0.450453	0.205002	0.184348	0.341689	30	0	0.0945281	0.517752	1.80596	0.148609	0.105149	0.95459	8.15212e+06	1.93342e+08	1.07403e+09	1.08764e+09	2.05002e+09	4.50453e+09	0	0	2.84979	1.34802	2.6036	9.07091	-0.39749
algo	crypto	2024	12	2024-12-31	0.492082	0.333804	0.324659	0.512942	0.408939	0.413907	0.188282	31	0	0.066292	0.369098	1.26651	0.294542	0.367064	0.864451	6.29374e+07	3.26542e+08	1.5362e+09	3.24659e+09	4.08939e+09	5.12942e+09	0	0	-0.242336	-0.277515	-0.751873	-0.942193	-0.439704
algo	crypto	2025	1	2025-01-31	0.3777	0.378756	0.342228	0.469479	0.396589	0.392712	0.127251	31	0	0.0637109	0.354727	1.2172	0.210424	0.229632	0.857116	5.96058e+07	1.60507e+08	4.27372e+08	3.42228e+09	3.96589e+09	4.69479e+09	0	0	0.134665	0.126338	0.356154	0.600397	-0.293873
algo	crypto	2025	2	2025-02-28	0.34841	0.238077	0.22853	0.34841	0.273632	0.272284	0.11988	28	0	0.0512152	0.271005	0.978465	0.257946	0.344078	0.904586	3.1888e+07	8.08975e+07	3.29211e+08	2.2853e+09	2.73632e+09	3.4841e+09	0	0	-0.371423	-0.464296	-1.71324	-1.79997	-0.388022
algo	crypto	2025	3	2025-03-31	0.252829	0.179945	0.179391	0.290495	0.207699	0.199428	0.111104	31	0	0.062197	0.346298	1.18827	0.28261	0.382465	0.925102	1.93937e+07	5.99004e+07	2.58243e+08	1.79391e+09	2.07699e+09	2.90495e+09	0	0	-0.244175	-0.279945	-0.808393	-0.990572	-0.468304
algo	crypto	2025	4	2025-04-30	0.189123	0.219729	0.154513	0.230513	0.193884	0.189037	0.0760006	30	0	0.0529546	0.290044	1.0117	0.184031	0.183005	0.935489	1.67015e+07	4.7319e+07	9.06121e+07	1.54513e+09	1.93884e+09	2.30513e+09	0	0	0.221093	0.199746	0.688675	1.08539	-0.32367
algo	crypto	2025	5	2025-05-31	0.217628	0.194268	0.192661	0.252092	0.220697	0.221887	0.0594306	31	0	0.0422514	0.235246	0.807212	0.163134	0.23575	0.919562	2.14369e+07	4.28555e+07	1.01032e+08	1.92661e+09	2.20697e+09	2.52092e+09	0	0	-0.115876	-0.123158	-0.52353	-0.754952	-0.286651
algo	crypto	2025	6	2025-06-30	0.195606	0.185036	0.159673	0.207623	0.182002	0.180902	0.0479491	30	0	0.0382619	0.209569	0.730993	0.140564	0.230943	0.933334	1.02308e+07	3.20512e+07	8.42573e+07	1.59673e+09	1.82002e+09	2.07623e+09	0	0	-0.0475246	-0.048691	-0.232338	-0.346398	-0.213451
algo	crypto	2025	7	2025-07-31	0.171207	0.244685	0.171207	0.322227	0.243248	0.261568	0.151021	31	0	0.0602878	0.335668	1.1518	0.190555	0.240644	0.928519	1.113e+07	1.06321e+08	4.47711e+08	1.71207e+09	2.43248e+09	3.22227e+09	0	0	0.322369	0.279425	0.832443	1.46638	-0.134705
algo	crypto	2025	8	2025-08-31	0.236207	0.231991	0.227068	0.280896	0.253147	0.25376	0.0538283	31	0	0.0494233	0.275178	0.944232	0.201723	0.174102	0.905197	2.92248e+07	7.02125e+07	1.34897e+08	2.27068e+09	2.53147e+09	2.80896e+09	0	0	-0.051878	-0.0532721	-0.193592	-0.264085	-0.0944574
algo	crypto	2025	9	2025-09-30	0.226191	0.207795	0.202763	0.253044	0.228123	0.231994	0.0502814	30	0	0.0280516	0.153645	0.535925	0.132049	0.198706	0.915344	1.31945e+07	3.78014e+07	8.23132e+07	2.02763e+09	2.28123e+09	2.53044e+09	0	0	-0.104301	-0.11015	-0.716915	-0.834161	-0.218165
algo	crypto	2025	10	2025-10-31	0.220391	0.177439	0.172971	0.229383	0.196824	0.185677	0.0564126	31	0	0.0543861	0.302809	1.03905	0.254234	0.245932	0.927783	1.28658e+07	5.75854e+07	1.96764e+08	1.72971e+09	1.96824e+09	2.29383e+09	0	0	-0.146083	-0.157921	-0.52152	-0.621164	-0.282468
algo	crypto	2025	11	2025-11-30	0.17873	0.1374	0.135802	0.189027	0.157978	0.156883	0.0532254	30	0	0.0463983	0.254134	0.886438	0.180712	0.281575	0.943301	1.16604e+07	3.48581e+07	8.44003e+07	1.35802e+09	1.57978e+09	1.89027e+09	0	0	-0.225649	-0.25573	-1.00628	-1.41512	-0.260073
algo	crypto	2025	12	2025-12-31	0.130558	0.110344	0.107313	0.144009	0.122462	0.118947	0.0366963	31	0	0.0320899	0.178669	0.613077	0.140132	0.254819	0.955196	7.49792e+06	1.80806e+07	3.33885e+07	1.07313e+09	1.22462e+09	1.44009e+09	0	0	-0.196915	-0.219294	-1.22738	-1.56492	-0.183577
algo	crypto	2026	1	2026-01-31	0.120344	0.103813	0.103813	0.142067	0.125882	0.127332	0.0382541	31	0	0.042158	0.234726	0.805428	0.162806	0.269268	0.956657	5.6824e+06	1.88407e+07	4.16161e+07	1.03813e+09	1.25882e+09	1.42067e+09	0	0	-0.0591913	-0.0610155	-0.259944	-0.374774	-0.321218
algo	crypto	2026	2	2026-02-28	0.100736	0.0878119	0.0836571	0.106096	0.0932254	0.0916321	0.0224388	28	0	0.0460821	0.243844	0.880397	0.181255	0.211496	0.965072	5.63758e+06	1.52068e+07	4.50282e+07	8.36571e+08	9.32254e+08	1.06096e+09	0	0	-0.154133	-0.167393	-0.686476	-0.92352	-0.360683
algo	crypto	2026	3	2026-03-31	0.0856433	0.0934684	0.0809358	0.0973888	0.0873108	0.0871932	0.016453	31	0	0.0355939	0.198178	0.68002	0.106687	0.168941	0.966208	4.81932e+06	1.23636e+07	3.87824e+07	8.09358e+08	8.73108e+08	9.73888e+08	0	0	0.0644162	0.0624264	0.315001	0.585134	-0.317754
algo	crypto	2026	4	2026-04-30	0.102147	0.110175	0.101681	0.122895	0.111016	0.110231	0.0212139	30	0	0.0450621	0.246815	0.86091	0.12726	0.172618	0.957547	6.46054e+06	2.68527e+07	1.07161e+08	1.01681e+09	1.11016e+09	1.22895e+09	0	0	0.178739	0.164445	0.666269	1.2922	-0.190674
bal	crypto	2020	6	2020-06-30	17.1576	9.9225	9.9225	17.1576	12.1555	11.609	7.23507	6	0	0.137893	0.308338	2.63444	0.368169	0.421684	0.421684	89025	131987	191637	3.51604e+08	4.3073e+08	6.07978e+08	0	0
bal	crypto	2020	7	2020-07-31	11.1355	10.55	8.11	11.5623	10.0392	10.1444	3.45234	31	0	0.0742199	0.413239	1.41797	0.269691	0.296988	0.527322	31743.1	134601	262960	290905700	3.59862e+08	4.16418e+08	0	0	0.0632401	0.061321	0.148391	0.227375
bal	crypto	2020	8	2020-08-31	10.6602	32.9438	9.835	33.303	20.8418	21.2978	23.468	31	0	0.138926	0.773508	2.65418	0.312854	0.33066	0.426783	128281	6.1508e+06	2.27194e+07	355633600	7.61478e+08	1.22355e+09	1	0	2.12264	1.13868	1.4721	3.63964
bal	crypto	2020	9	2020-09-30	34.5271	15.6521	13.0874	34.5271	19.9305	20.429	21.4397	30	0	0.0997085	0.546126	1.90493	0.479435	0.620952	0.620952	3.16359e+06	8.65976e+06	2.46801e+07	4.88423e+08	7.39065e+08	1.26853e+09	0	0	-0.524884	-0.744197	-1.36268	-1.55224
bal	crypto	2020	10	2020-10-31	17.6263	9.90966	9.90966	17.6263	13.681	13.7806	7.71661	31	0	0.0543311	0.302503	1.03799	0.264554	0.43779	0.712989	1.07499e+06	6.60062e+06	2.81902e+07	3.77013e+08	5.16174e+08	6.60368e+08	0	0	-0.366881	-0.457097	-1.51105	-1.7278
bal	crypto	2020	11	2020-11-30	9.88011	14.8801	8.766	17.3102	12.6831	13.152	8.54423	30	0	0.0662825	0.363044	1.26633	0.179535	0.236054	0.746113	1.77383e+06	8.43052e+06	2.23506e+07	3.34773e+08	4.87181e+08	6.66097e+08	0	0	0.501576	0.406515	1.11974	2.26426
bal	crypto	2020	12	2020-12-31	13.608	13.5818	11.2025	14.6783	13.1552	13.2371	3.47575	31	0	0.0602771	0.335608	1.15159	0.237529	0.236795	0.675544	2.60236e+06	6.05297e+06	1.75276e+07	4.35947e+08	5.13347e+08	5.69077e+08	0	0	-0.0872536	-0.0912972	-0.272035	-0.384362
bal	crypto	2021	1	2021-01-31	13.9512	26.5422	13.9512	28.3568	19.7076	19.3908	14.4056	31	0	0.0871949	0.485481	1.66586	0.315461	0.226485	0.595934	7.98073e+06	1.70614e+07	2.9171e+07	5.4898e+08	7.82105e+08	1.13229e+09	0	0	0.954254	0.670009	1.38009	2.1239
bal	crypto	2021	2	2021-02-28	29.9283	34.7053	29.9283	52.2589	40.1795	39.1407	22.3306	28	0	0.0800964	0.42383	1.53024	0.277459	0.338081	0.338081	1.51038e+07	4.54885e+07	1.2243e+08	1.19504e+09	1.61825e+09	2.10185e+09	0	0	0.307551	0.268156	0.632696	0.966472
bal	crypto	2021	3	2021-03-31	38.021	57.1867	36.5188	62.2201	49.7793	50.8406	25.7013	31	0	0.0654467	0.364392	1.25036	0.167924	0.237673	0.301196	1.10328e+07	3.81362e+07	1.85137e+08	1.48467e+09	2.03612e+09	2.5476e+09	0	0	0.647779	0.499428	1.37058	2.97413
bal	crypto	2021	4	2021-04-30	55.9319	61.6859	46.8687	68.1011	56.2233	55.725	21.2324	30	0	0.068784	0.376746	1.31412	0.235165	0.311778	0.311778	1.56066e+07	4.49082e+07	1.43486e+08	1.95302e+09	2.33413e+09	2.8279e+09	0	0	0.0786769	0.0757352	0.201025	0.322051
bal	crypto	2021	5	2021-05-31	63.4338	30.7511	25.5838	72.3738	49.4237	53.9911	46.79	31	0	0.110248	0.613834	2.10628	0.50827	0.646505	0.646505	6.84793e+06	4.20652e+07	1.08097e+08	1.08092e+09	2.08008e+09	3.02631e+09	0	0	-0.50149	-0.696131	-1.13407	-1.36961
bal	crypto	2021	6	2021-06-30	29.0132	22.1714	15.0289	31.7357	22.5434	22.4682	16.7068	30	0	0.0777194	0.425687	1.48483	0.347967	0.526434	0.792343	5.02331e+06	1.16586e+07	2.85748e+07	6.45869e+08	9.63707e+08	1.35004e+09	0	0	-0.279004	-0.327121	-0.768456	-0.940092
bal	crypto	2021	7	2021-07-31	20.2034	21.7464	16.081	25.2238	20.3863	19.9325	9.14278	31	0	0.0510082	0.284002	0.97451	0.203463	0.362467	0.777806	2.73037e+06	9.46012e+06	2.87008e+07	7.00408e+08	8.84718e+08	1.08765e+09	0	0	-0.0191676	-0.0193537	-0.0681463	-0.0951211
bal	crypto	2021	8	2021-08-31	21.5737	27.7259	21.5737	30.3108	26.2503	26.6095	8.73707	31	0	0.0425392	0.236848	0.812711	0.143656	0.148003	0.701913	8.36423e+06	2.77706e+07	5.07467e+07	9.4277e+08	1.15665e+09	1.33777e+09	0	0	0.274963	0.242917	1.02562	1.69096
bal	crypto	2021	9	2021-09-30	31.6048	19.6887	18.9425	33.5379	25.2901	25.3781	14.5953	30	0	0.0697681	0.382136	1.33292	0.319299	0.43519	0.738268	5.66898e+06	2.70304e+07	7.47023e+07	8.52509e+08	1.12933e+09	1.48992e+09	0	0	-0.289879	-0.34232	-0.895808	-1.0721
bal	crypto	2021	10	2021-10-31	21.6081	24.6599	20.3913	26.208	22.561	22.2439	5.81672	31	0	0.0387557	0.215782	0.740426	0.116358	0.10303	0.718251	7.01164e+06	2.00009e+07	1.00437e+08	9.23623e+08	1.0225e+09	1.19469e+09	0	0	0.252488	0.225132	1.04333	1.93483
bal	crypto	2021	11	2021-11-30	26.2497	21.1671	19.2985	28.5614	23.3506	23.0903	9.26295	30	0	0.0568417	0.311335	1.08596	0.25122	0.324317	0.73335	8.95284e+06	2.05974e+07	4.06996e+07	8.88115e+08	1.07247e+09	1.30611e+09	0	0	-0.141642	-0.152734	-0.490577	-0.607967
bal	crypto	2021	12	2021-12-31	20.6528	17.5354	13.7052	20.6528	16.9135	16.5231	6.94762	31	0	0.0555075	0.309052	1.06047	0.241827	0.336402	0.810634	5.81882e+06	1.48398e+07	5.34967e+07	6.36673e+08	7.88053e+08	9.5643e+08	0	0	-0.17157	-0.188222	-0.609031	-0.778335
bal	crypto	2022	1	2022-01-31	18.5567	12.1729	11.427	19.655	15.5829	17.2786	8.22802	31	0	0.0472155	0.262885	0.902051	0.238675	0.418623	0.842112	4.21997e+06	1.21593e+07	2.25378e+07	5.42438e+08	7.35302e+08	9.21622e+08	0	0	-0.305811	-0.365011	-1.38848	-1.52932
bal	crypto	2022	2	2022-02-28	12.5372	13.0187	11.6106	15.7339	13.3402	13.2843	4.12327	28	0	0.0573863	0.30366	1.09636	0.198934	0.262063	0.839574	3.20989e+06	7.95422e+06	1.51947e+07	5.5756e+08	6.38027e+08	7.53732e+08	0	0	0.0694848	0.067177	0.221225	0.337684
bal	crypto	2022	3	2022-03-31	13.3037	15.5962	10.5722	16.6657	12.3272	11.9502	6.09347	31	0	0.0471651	0.262604	0.901087	0.160643	0.205316	0.853922	2.18978e+06	9.70597e+06	5.60729e+07	5.1106e+08	5.98511e+08	8.1632e+08	0	0	0.197982	0.180638	0.687873	1.12447
bal	crypto	2022	4	2022-04-30	16.3114	12.1414	12.1414	20.2061	15.766	15.3255	8.06463	30	0	0.060348	0.33054	1.15295	0.251797	0.399119	0.83224	7.37385e+06	3.42779e+07	1.72154e+08	5.99306e+08	7.74163e+08	9.89861e+08	0	0	-0.221513	-0.250404	-0.757559	-0.994466
bal	crypto	2022	5	2022-05-31	12.7271	7.50012	6.43128	14.5474	9.51047	8.6209	8.11609	31	0	0.0723319	0.402727	1.3819	0.343512	0.557908	0.911138	3.23583e+06	1.17959e+07	4.37473e+07	3.20427e+08	4.71515e+08	7.18399e+08	0	0	-0.382271	-0.481705	-1.19611	-1.4023
bal	crypto	2022	6	2022-06-30	6.77291	4.4285	3.92735	7.6862	5.6376	5.18522	3.75885	30	0	0.0786995	0.431055	1.50355	0.358429	0.489039	0.945735	2.27848e+06	6.9922e+06	1.75852e+07	1.97594e+08	2.83057e+08	3.84951e+08	0	0	-0.409543	-0.526858	-1.22225	-1.46991
bal	crypto	2022	7	2022-07-31	4.55219	6.16679	4.19193	6.35286	5.19945	5.10318	2.16093	31	0	0.0585962	0.32625	1.11948	0.18025	0.183731	0.942079	1.52673e+06	4.19372e+06	1.02e+07	2.128e+08	2.64561e+08	3.2527e+08	0	0	0.392523	0.331117	1.01492	1.83698
bal	crypto	2022	8	2022-08-31	6.291	7.10914	5.60213	7.27897	6.3301	6.291	1.67684	31	0	0.0583749	0.325018	1.11525	0.208802	0.230368	0.922595	1.57243e+06	7.42689e+06	6.4446e+07	2.8916e+08	3.26297e+08	3.74686e+08	0	0	0.152811	0.142203	0.437525	0.681045
bal	crypto	2022	9	2022-09-30	7.79806	5.33918	5.15309	7.79806	6.29205	5.9998	2.64496	30	0	0.046163	0.252845	0.881943	0.215512	0.339182	0.928799	1.835e+06	6.35306e+06	2.6429e+07	2.69497e+08	3.28188e+08	4.04657e+08	0	0	-0.248969	-0.286308	-1.13235	-1.3285
bal	crypto	2022	10	2022-10-31	5.25473	6.8442	4.9104	6.90828	5.67862	5.25473	1.99788	31	0	0.0304646	0.16962	0.582025	0.0773672	0.0655284	0.932152	1.01342e+06	4.85803e+06	3.67127e+07	2.58893e+08	3.00189e+08	3.66945e+08	0	0	0.281882	0.248329	1.46404	3.20975
bal	crypto	2022	11	2022-11-30	6.69231	6.18186	4.68392	7.07132	5.84007	5.6343	2.3874	30	0	0.06847	0.375025	1.30812	0.284261	0.337617	0.935282	1.30692e+06	4.57686e+06	2.17569e+07	2.49713e+08	3.12302e+08	3.76644e+08	0	0	-0.0967739	-0.101782	-0.271401	-0.358059
bal	crypto	2022	12	2022-12-31	6.27325	5.15519	5.15519	6.33568	5.73735	5.60321	1.1805	31	0	0.0300502	0.167312	0.574108	0.145026	0.186325	0.92877	975974	3.17173e+06	3.84714e+07	2.80601e+08	3.10485e+08	3.41502e+08	0	0	-0.166079	-0.181616	-1.08549	-1.2523
bal	crypto	2023	1	2023-01-31	5.22282	6.67365	5.22282	7.13058	6.26303	6.58698	1.90775	31	0	0.030412	0.169327	0.581021	0.103477	0.0703925	0.927835	1.24111e+06	3.21964e+06	7.99658e+06	2.84339e+08	3.43039e+08	3.92349e+08	0	0	0.294551	0.258164	1.52465	2.4949
bal	crypto	2023	2	2023-02-28	7.00847	7.07526	6.26848	7.53696	6.95263	7.03337	1.26848	28	0	0.0377548	0.19978	0.721305	0.121144	0.126145	0.913387	1.59507e+06	5.09366e+06	4.43963e+07	3.46695e+08	3.84872e+08	4.18004e+08	0	0	0.0601786	0.0584374	0.292509	0.48238
bal	crypto	2023	3	2023-03-31	7.20757	6.97476	5.67933	7.20757	6.55292	6.55775	1.52824	31	0	0.0436224	0.242879	0.833405	0.170261	0.212033	0.921528	1.88471e+06	4.57168e+06	2.40711e+07	3.17211e+08	3.66769e+08	4.01031e+08	0	0	-0.0142048	-0.0143067	-0.0589045	-0.0840281
bal	crypto	2023	4	2023-04-30	6.98953	6.04134	5.99512	7.30421	6.71382	6.92529	1.30908	30	0	0.0297961	0.1632	0.569253	0.134772	0.179223	0.917165	715438	2.41513e+06	8.18926e+06	3.3973e+08	3.79528e+08	4.12309e+08	0	0	-0.133828	-0.143671	-0.880341	-1.06603
bal	crypto	2023	5	2023-05-31	5.89946	5.21016	5.15402	6.26934	5.58308	5.50531	1.11532	31	0	0.0197825	0.110144	0.377944	0.0959287	0.177901	0.928786	449595	953132	2.74299e+06	2.94885e+08	3.18403e+08	3.563e+08	0	0	-0.137582	-0.148016	-1.34384	-1.54298
bal	crypto	2023	6	2023-06-30	5.25725	4.83193	4.25738	5.3805	4.72148	4.72848	1.12312	30	0	0.0303031	0.165977	0.578941	0.129698	0.208739	0.941175	447934	1.09549e+06	5.56293e+06	2.45046e+08	2.71789e+08	3.08487e+08	0	0	-0.0725945	-0.0753644	-0.454065	-0.581074	-0.22975
bal	crypto	2023	7	2023-07-31	4.89255	4.3775	4.3775	4.97534	4.64485	4.6133	0.59784	31	0	0.0230847	0.12853	0.441033	0.0905177	0.120161	0.939515	401109	1.08679e+06	4.24629e+06	2.55269e+08	2.69742e+08	2.88736e+08	0	0	-0.0940482	-0.0987692	-0.76845	-1.09116	-0.273552
bal	crypto	2023	8	2023-08-31	4.4501	3.44676	3.41612	4.4501	3.9101	3.96877	1.03398	31	0	0.0251525	0.140043	0.480538	0.12508	0.23235	0.952799	506829	1.27354e+06	3.42619e+06	2.00832e+08	2.29067e+08	2.59578e+08	0	0	-0.21262	-0.239044	-1.70693	-1.91112	-0.560088
bal	crypto	2023	9	2023-09-30	3.35336	3.32249	3.08937	3.45843	3.27423	3.3094	0.369062	30	0	0.0231469	0.126781	0.442221	0.095755	0.106714	0.957314	1.26119e+06	1.89305e+06	4.39484e+06	1.8309e+08	1.9359e+08	2.04057e+08	0	0	-0.036052	-0.0367179	-0.289618	-0.383457	-0.426442
bal	crypto	2023	10	2023-10-31	3.45356	3.39053	2.9402	3.47663	3.19871	3.21647	0.536425	31	0	0.0248344	0.138272	0.474461	0.100281	0.148646	0.959375	1.7356e+06	2.43795e+06	4.66519e+06	1.7561e+08	1.90797e+08	2.08148e+08	0	0	0.0204786	0.0202718	0.146608	0.20215	-0.317694
bal	crypto	2023	11	2023-11-30	3.55283	3.66123	3.32044	4.06775	3.72748	3.69898	0.747308	30	0	0.0365416	0.200146	0.698126	0.141613	0.149794	0.954121	3.32034e+06	5.77108e+06	1.47119e+07	1.99121e+08	2.24265e+08	2.44478e+08	0	0	0.0798396	0.0768125	0.383781	0.542409	-0.394631
bal	crypto	2023	12	2023-12-31	3.80132	4.24168	3.80132	4.66185	4.15033	4.14109	0.860525	31	0	0.0367116	0.204402	0.701374	0.141934	0.122367	0.947477	3.71887e+06	6.59816e+06	1.65216e+07	2.29785e+08	2.51874e+08	2.83729e+08	0	0	0.15854	0.14716	0.719957	1.03682	-0.339839
bal	crypto	2024	1	2024-01-31	4.56707	3.61327	3.5553	4.56707	3.97535	3.9645	1.01177	31	0	0.046138	0.256886	0.881466	0.185858	0.221535	0.950876	2.30603e+06	5.7996e+06	1.1002e+07	2.18093e+08	2.4338e+08	2.78408e+08	0	0	-0.148151	-0.160346	-0.624191	-0.862731	-0.513219
bal	crypto	2024	2	2024-02-29	3.59841	4.99364	3.54255	4.99364	4.09119	4.02277	1.45109	29	0	0.0182935	0.0985135	0.349497	0.029913	0.0269244	0.951052	2.34952e+06	4.7628e+06	1.29826e+07	2.18029e+08	2.52564e+08	3.09387e+08	0	0	0.382026	0.32355	3.28432	10.8164	-0.503086
bal	crypto	2024	3	2024-03-31	5.16286	5.24074	4.44724	6.03068	5.28543	5.18561	1.58343	31	0	0.0471451	0.262493	0.900706	0.180716	0.262563	0.938552	4.52911e+06	7.20048e+06	1.41435e+07	2.76834e+08	3.28795e+08	3.74664e+08	0	0	0.0494837	0.0482983	0.183999	0.267261	-0.580411
bal	crypto	2024	4	2024-04-30	5.04531	3.50474	3.50474	5.07857	4.22068	3.97148	1.57383	30	0	0.0488613	0.267624	0.933494	0.250176	0.309897	0.951575	3.4366e+06	4.89437e+06	9.46554e+06	2.20693e+08	2.64839e+08	3.18156e+08	0	0	-0.331252	-0.402348	-1.5034	-1.60826	-0.650608
bal	crypto	2024	5	2024-05-31	3.51075	4.0222	3.29748	4.07482	3.68637	3.59393	0.777336	31	0	0.0330033	0.183755	0.630527	0.092877	0.099533	0.954438	1.90676e+06	3.51664e+06	5.58517e+06	2.08291e+08	2.33047e+08	2.58208e+08	0	0	0.147647	0.137714	0.749444	1.48275	-0.552029
bal	crypto	2024	6	2024-06-30	4.02278	3.02137	2.94191	4.11082	3.41102	3.37802	1.16892	30	0	0.0283242	0.155138	0.541133	0.142951	0.284351	0.959351	1.9243e+06	3.3618e+06	6.13086e+06	1.87872e+08	2.17097e+08	2.60994e+08	0	0	-0.248827	-0.286119	-1.84429	-2.00152	-0.544764
bal	crypto	2024	7	2024-07-31	2.61765	2.38132	2.34484	2.73817	2.56261	2.58013	0.393331	31	0	0.0435183	0.2423	0.831416	0.20959	0.130322	0.967601	1.09774e+06	3.5778e+06	1.1941e+07	1.49965e+08	1.64264e+08	1.75666e+08	0	0	-0.211839	-0.238053	-0.982475	-1.13581	-0.570586
bal	crypto	2024	8	2024-08-31	2.38692	1.84605	1.8036	2.38692	1.97512	1.94434	0.583321	31	0	0.0426864	0.237668	0.815523	0.194403	0.244382	0.975079	1.48e+06	2.91553e+06	6.84092e+06	1.16129e+08	1.27503e+08	1.53589e+08	0	0	-0.224781	-0.254609	-1.07128	-1.3097	-0.637112
bal	crypto	2024	9	2024-09-30	1.77426	2.17545	1.65583	2.17545	1.92303	1.9033	0.519621	30	0	0.0399733	0.218943	0.763689	0.118841	0.142799	0.977121	1.57871e+06	3.7364e+06	2.45121e+07	1.07445e+08	1.24993e+08	1.41828e+08	0	0	0.178435	0.164187	0.749909	1.38157	-0.562234
bal	crypto	2024	10	2024-10-31	2.16145	1.85482	1.8106	2.17417	1.98259	1.98032	0.363573	31	0	0.0376801	0.209794	0.719877	0.169113	0.167224	0.974983	604949	1.83333e+06	9.91518e+06	1.18723e+08	1.29715e+08	1.42379e+08	0	0	-0.147387	-0.159449	-0.760028	-0.942855	-0.62464
bal	crypto	2024	11	2024-11-30	1.83578	2.93104	1.69488	2.93104	2.2537	2.22893	1.23616	30	0	0.0477396	0.261481	0.912065	0.114358	0.118419	0.976582	614314	2.39489e+06	5.08705e+06	1.11359e+08	1.48489e+08	1.93708e+08	0	0	0.580232	0.457572	1.74992	4.00123	-0.528762
bal	crypto	2024	12	2024-12-31	3.01567	2.49644	2.46879	3.87625	3.0753	3.05558	1.40747	31	0	0.0645566	0.359436	1.23335	0.266202	0.3631	0.965888	902040	3.96109e+06	1.12751e+07	1.63947e+08	2.03901e+08	2.56631e+08	0	0	-0.148276	-0.160493	-0.446514	-0.602901	-0.534067
bal	crypto	2025	1	2025-01-31	2.55986	2.48718	2.3134	3.11779	2.59676	2.57783	0.804392	31	0	0.055365	0.308259	1.05775	0.174877	0.258001	0.968035	643172	4.34368e+06	5.59806e+07	1.54747e+08	1.7328e+08	2.08118e+08	0	0	-0.00370805	-0.00371494	-0.0120514	-0.0212432	-0.466196
bal	crypto	2025	2	2025-02-28	2.27994	1.71516	1.71516	2.27994	1.9421	1.95847	0.564778	28	0	0.0425673	0.225245	0.813248	0.212806	0.247716	0.976301	1.04252e+06	1.79843e+06	4.59817e+06	1.15518e+08	1.30401e+08	1.52674e+08	0	0	-0.310399	-0.371641	-1.64994	-1.74639	-0.551852
bal	crypto	2025	3	2025-03-31	1.69279	1.322	1.32163	1.90772	1.50217	1.4696	0.586088	31	0	0.0518705	0.288803	0.990985	0.232788	0.30722	0.981739	666861	1.55565e+06	2.87015e+06	8.9556e+07	1.01484e+08	1.28516e+08	0	0	-0.229229	-0.260364	-0.90153	-1.11846	-0.612655
bal	crypto	2025	4	2025-04-30	1.36173	0.937289	0.776277	1.36173	0.984381	0.939902	0.58545	30	0	0.0823037	0.450796	1.57241	0.399965	0.429932	0.989274	432379	4.01547e+06	2.09333e+07	5.27075e+07	6.6924e+07	9.22958e+07	0	0	-0.291005	-0.343907	-0.762889	-0.859843	-0.62224
bal	crypto	2025	5	2025-05-31	1.24352	1.05665	1.01619	1.24915	1.13684	1.15954	0.232958	31	0	0.0722636	0.402347	1.38059	0.195309	0.182807	0.985959	1.9055e+06	5.10658e+06	2.75956e+07	6.93389e+07	7.77159e+07	8.54097e+07	0	0	0.127351	0.11987	0.297928	0.613748	-0.548163
bal	crypto	2025	6	2025-06-30	1.05933	0.979989	0.929584	1.15629	1.03798	1.05982	0.226702	30	0	0.0308057	0.16873	0.588541	0.135296	0.19606	0.987156	525307	2.52925e+06	4.81301e+06	6.39483e+07	7.13234e+07	7.93758e+07	0	0	-0.0725533	-0.07532	-0.446395	-0.556705	-0.455148
bal	crypto	2025	7	2025-07-31	0.959773	1.28164	0.951736	1.47401	1.17933	1.22386	0.522271	31	0	0.0371492	0.206838	0.709735	0.103972	0.130504	0.98685	547217	2.84379e+06	1.68583e+07	6.56195e+07	8.14961e+07	1.01929e+08	0	0	0.307813	0.268357	1.29742	2.58104	-0.469572
bal	crypto	2025	8	2025-08-31	1.21753	1.27153	1.18871	1.51865	1.32845	1.33374	0.329944	31	0	0.0530446	0.29534	1.01341	0.194637	0.184865	0.983575	1.31595e+06	4.26043e+06	1.18403e+07	8.238e+07	9.22843e+07	1.05405e+08	0	0	-0.00788871	-0.00791999	-0.0268166	-0.040691	-0.502874
bal	crypto	2025	9	2025-09-30	1.24594	1.11508	1.06537	1.30819	1.20344	1.22901	0.242817	30	0	0.02322	0.127181	0.443618	0.106376	0.185613	0.98528	1.23327e+06	2.83809e+06	5.66807e+06	7.45363e+07	8.4035e+07	9.13136e+07	0	0	-0.123039	-0.131293	-1.03233	-1.23423	-0.468799
bal	crypto	2025	10	2025-10-31	1.14729	0.985421	0.956303	1.22319	1.05434	1.01399	0.266889	31	0	0.0461329	0.256857	0.881368	0.207459	0.218191	0.986787	1.12157e+06	3.0829e+06	7.12419e+06	6.70683e+07	7.40038e+07	8.57144e+07	0	0	-0.116281	-0.123616	-0.481263	-0.595857	-0.548545
bal	crypto	2025	11	2025-11-30	0.989946	0.660116	0.655897	0.989946	0.759779	0.738046	0.334049	30	0	0.0358857	0.196554	0.685595	0.187714	0.337442	0.990937	685147	2.89787e+06	1.26692e+07	4.63384e+07	5.36042e+07	6.96818e+07	0	0	-0.330118	-0.400654	-2.03839	-2.13438	-0.579657
bal	crypto	2025	12	2025-12-31	0.638738	0.601441	0.597364	0.707378	0.641791	0.629652	0.110014	31	0	0.0259108	0.144265	0.495024	0.10815	0.155523	0.991746	406521	1.32878e+06	3.32773e+06	4.24225e+07	4.5505e+07	5.01018e+07	0	0	-0.088886	-0.0930872	-0.645251	-0.860722	-0.558875
bal	crypto	2026	1	2026-01-31	0.595304	0.416282	0.416282	0.608907	0.530271	0.541953	0.192625	31	0	0.0268639	0.149572	0.513234	0.146322	0.316345	0.994248	411629	1.16892e+06	2.49734e+06	2.97432e+07	3.77836e+07	4.32952e+07	0	0	-0.307858	-0.367964	-2.46012	-2.51475	-0.641132
bal	crypto	2026	2	2026-02-28	0.40505	0.130956	0.130956	0.40505	0.16797	0.152165	0.274094	28	0	0.103818	0.549354	1.98344	0.57304	0.676692	0.998191	261632	633581	5.52736e+06	9.39513e+06	1.20231e+07	2.89429e+07	0	0	-0.685415	-1.1565	-2.10521	-2.01819	-0.749348
bal	crypto	2026	3	2026-03-31	0.128018	0.14259	0.128018	0.176939	0.150675	0.150747	0.048921	31	0	0.0642347	0.357643	1.2272	0.157016	0.206276	0.998231	219261	635244	8.97553e+06	9.18488e+06	1.08394e+07	1.27014e+07	0	0	0.0888353	0.0851086	0.23797	0.542038	-0.740469
bal	crypto	2026	4	2026-04-30	0.147362	0.14715	0.132497	0.180332	0.151477	0.150326	0.0478351	30	0	0.0685511	0.37547	1.30967	0.198616	0.184205	0.998169	67990.4	364805	1.89881e+06	9.56251e+06	1.09472e+07	1.30254e+07	0	0	0.0319823	0.0314815	0.0838456	0.158504	-0.725861
bat	crypto	2017	10	2017-10-31	0.283461	0.153294	0.131909	0.283461	0.171703	0.157877	0.151553	26	0	0.0826408	0.413204	1.57885	0.372793	0.534651	0.534651	0	1511.98	4764.95	1.97863e+08	2.57555e+08	4.25192e+08	0	0
bat	crypto	2017	11	2017-11-30	0.14208	0.160156	0.126735	0.193388	0.155987	0.156621	0.0666522	30	0	0.0839514	0.459821	1.60389	0.325864	0.221537	0.552901	874.696	744065	1.84825e+06	1.90103e+08	2.3398e+08	2.90081e+08	0	0	0.0447666	0.0437935	0.0952404	0.134392
bat	crypto	2017	12	2017-12-31	0.176293	0.414793	0.169705	0.414793	0.286443	0.27186	0.245088	31	0	0.0991996	0.55232	1.89521	0.2946	0.22301	0.401313	1.06992e+06	4.6305e+06	1.14308e+07	2.54557e+08	4.29664e+08	6.22189e+08	0	0	1.58993	0.951629	1.72297	3.23024
bat	crypto	2018	1	2018-01-31	0.470588	0.513366	0.470014	0.86375	0.625533	0.603876	0.393736	31	0	0.141962	0.790413	2.71219	0.592005	0.455845	0.455845	2.92935e+06	1.22847e+07	4.50369e+07	7.05021e+08	9.38299e+08	1.29563e+09	0	0	0.237645	0.21321	0.269745	0.360149
bat	crypto	2018	2	2018-02-28	0.457912	0.338549	0.293803	0.482038	0.382163	0.371281	0.188236	28	0	0.102482	0.542286	1.95792	0.422586	0.358386	0.659852	204102	1.70324e+06	3.989e+06	4.40704e+08	5.73244e+08	7.23058e+08	0	0	-0.34053	-0.416319	-0.767711	-0.98517
bat	crypto	2018	3	2018-03-31	0.377059	0.194724	0.185418	0.406781	0.252606	0.22044	0.221363	31	0	0.0664991	0.370251	1.27046	0.32868	0.544183	0.785334	655397	2.17758e+06	1.3943e+07	2.78126e+08	3.78908e+08	6.10171e+08	0	0	-0.424827	-0.553084	-1.49381	-1.68274
bat	crypto	2018	4	2018-04-30	0.185402	0.480973	0.180654	0.480973	0.307528	0.269031	0.300319	30	0	0.071096	0.389409	1.35829	0.194607	0.147391	0.790849	824863	4.2197e+06	2.83544e+07	2.70981e+08	4.61292e+08	7.2146e+08	0	0	1.47002	0.904226	2.32205	4.64642
bat	crypto	2018	5	2018-05-31	0.505071	0.284592	0.254468	0.505071	0.367705	0.3635	0.250603	31	0	0.0588603	0.32772	1.12453	0.281562	0.496173	0.705391	401346	3.41541e+06	9.28596e+06	3.81702e+08	5.51558e+08	7.57606e+08	0	0	-0.4083	-0.524755	-1.60123	-1.86373
bat	crypto	2018	6	2018-06-30	0.290235	0.247194	0.194629	0.311834	0.254727	0.255381	0.117205	30	0	0.0900531	0.493241	1.72046	0.373078	0.357783	0.774669	519082	1.64951e+06	5.12188e+06	2.91944e+08	3.8209e+08	4.67751e+08	0	0	-0.131409	-0.140882	-0.285626	-0.377621
bat	crypto	2018	7	2018-07-31	0.263977	0.275607	0.244072	0.358073	0.302834	0.31476	0.114001	31	0	0.0724548	0.403411	1.38425	0.233836	0.230303	0.717427	824858	4.00268e+06	1.94949e+07	3.66108e+08	4.54251e+08	5.37109e+08	0	0	0.114943	0.108804	0.269709	0.4653
bat	crypto	2018	8	2018-08-31	0.285073	0.218321	0.187862	0.285073	0.2238	0.218321	0.0972107	31	0	0.0767013	0.427055	1.46538	0.332901	0.341003	0.782504	749818	1.90896e+06	5.79525e+06	2.81794e+08	3.35699e+08	4.2761e+08	0	0	-0.207853	-0.233009	-0.545618	-0.699936
bat	crypto	2018	9	2018-09-30	0.228485	0.170591	0.143299	0.232095	0.172447	0.165889	0.088796	30	0	0.0655141	0.358836	1.25165	0.286018	0.382584	0.834096	753159	1.63119e+06	3.33371e+06	2.14949e+08	2.5867e+08	3.48143e+08	0	0	-0.218627	-0.246702	-0.687508	-0.862542
bat	crypto	2018	10	2018-10-31	0.170631	0.247157	0.164087	0.272625	0.208477	0.183729	0.108538	31	0	0.0583415	0.324832	1.11461	0.17393	0.154836	0.810029	768934	5.64658e+06	2.01092e+07	2.46131e+08	3.12715e+08	4.08938e+08	0	0	0.448832	0.370758	1.14138	2.13165
bat	crypto	2018	11	2018-11-30	0.252795	0.166399	0.134126	0.337013	0.221773	0.212568	0.202888	30	0	0.0844801	0.462717	1.61399	0.353299	0.602017	0.844717	2.15015e+06	1.28133e+07	6.43981e+07	2.01189e+08	3.32659e+08	5.0552e+08	0	0	-0.32675	-0.395638	-0.855033	-1.11984
bat	crypto	2018	12	2018-12-31	0.174519	0.125875	0.125034	0.179648	0.140686	0.137012	0.0546134	31	0	0.0613053	0.341334	1.17124	0.282175	0.304003	0.855243	931085	2.51135e+06	5.32256e+06	1.87551e+08	2.11029e+08	2.69471e+08	0	0	-0.243533	-0.279096	-0.817664	-0.989089
bat	crypto	2019	1	2019-01-31	0.129733	0.112213	0.111678	0.140743	0.126139	0.124647	0.0290649	31	0	0.0427119	0.23781	0.816009	0.200615	0.20651	0.870705	620345	1.45989e+06	3.39828e+06	1.67518e+08	1.89209e+08	2.11115e+08	0	0	-0.108535	-0.114889	-0.483115	-0.572684
bat	crypto	2019	2	2019-02-28	0.109577	0.160909	0.104348	0.164651	0.128076	0.125296	0.0603031	28	0	0.0507455	0.26852	0.969491	0.128451	0.0812289	0.879192	439087	4.35244e+06	4.12575e+07	1.56522e+08	1.92114e+08	2.46976e+08	0	0	0.433958	0.360438	1.34232	2.80605
bat	crypto	2019	3	2019-03-31	0.163022	0.285301	0.163022	0.285301	0.201371	0.193134	0.122279	31	0	0.04506	0.250883	0.860869	0.101467	0.0942427	0.811262	2.16064e+06	9.18268e+06	5.00265e+07	2.44533e+08	3.02057e+08	4.27952e+08	0	0	0.773059	0.572706	2.28276	5.64429
bat	crypto	2019	4	2019-04-30	0.283644	0.378634	0.270635	0.444485	0.339645	0.322219	0.17385	30	0	0.0634176	0.347352	1.21159	0.218249	0.170538	0.686674	5.55836e+06	3.03736e+07	1.27956e+08	4.05953e+08	5.09467e+08	6.66727e+08	0	0	0.32714	0.283026	0.814811	1.2968
bat	crypto	2019	5	2019-05-31	0.381642	0.347909	0.279418	0.405427	0.357533	0.360518	0.126009	31	0	0.0659231	0.367044	1.25946	0.212394	0.267852	0.676506	1.45179e+07	2.86889e+07	6.84073e+07	4.19127e+08	5.363e+08	6.0814e+08	0	0	-0.0811477	-0.0846298	-0.230571	-0.398457
bat	crypto	2019	6	2019-06-30	0.358675	0.292882	0.284526	0.358675	0.326987	0.32812	0.074149	30	0	0.038767	0.212336	0.740643	0.161704	0.20673	0.670593	7.82748e+06	1.91161e+07	3.74695e+07	4.26789e+08	4.90481e+08	5.38012e+08	0	0	-0.158164	-0.17217	-0.810839	-1.06473
bat	crypto	2019	7	2019-07-31	0.331598	0.246658	0.203584	0.331598	0.266804	0.256423	0.128015	31	0	0.0620981	0.345747	1.18638	0.268479	0.386053	0.764303	2.66228e+06	9.13943e+06	4.17459e+07	3.05376e+08	4.00207e+08	4.97397e+08	0	0	-0.157826	-0.171769	-0.496804	-0.639784
bat	crypto	2019	8	2019-08-31	0.23644	0.177159	0.16862	0.23644	0.198563	0.195545	0.0678203	31	0	0.0476886	0.265519	0.91109	0.220329	0.286839	0.804781	1.53515e+06	5.26772e+06	1.24661e+07	2.5293e+08	2.97845e+08	3.54661e+08	0	0	-0.281763	-0.330956	-1.24645	-1.5021
bat	crypto	2019	9	2019-09-30	0.181874	0.172543	0.152152	0.210719	0.176716	0.174065	0.0585666	30	0	0.050591	0.277098	0.966539	0.207651	0.277937	0.823847	840577	3.47335e+06	9.55314e+06	2.28228e+08	2.65074e+08	3.16078e+08	0	0	-0.0260518	-0.0263972	-0.0952628	-0.127123
bat	crypto	2019	10	2019-10-31	0.165128	0.232023	0.165128	0.252397	0.213513	0.215915	0.0872694	31	0	0.0467999	0.260571	0.89411	0.13999	0.106946	0.808825	1.4936e+06	8.5995e+06	3.19451e+07	2.47691e+08	3.20269e+08	3.78595e+08	0	0	0.344725	0.29619	1.1367	2.11579
bat	crypto	2019	11	2019-11-30	0.235306	0.203636	0.203256	0.273725	0.235366	0.238499	0.0704684	30	0	0.0392676	0.215077	0.750206	0.164519	0.257443	0.764682	2.83838e+06	6.90189e+06	1.42377e+07	3.04884e+08	3.53048e+08	4.10587e+08	0	0	-0.122347	-0.130504	-0.606778	-0.793248
bat	crypto	2019	12	2019-12-31	0.196295	0.180249	0.154662	0.196295	0.178091	0.179322	0.0416328	31	0	0.0475056	0.2645	0.907594	0.196889	0.212093	0.820941	1.87751e+06	4.85134e+06	9.8398e+06	2.31993e+08	2.67137e+08	2.94443e+08	0	0	-0.114846	-0.121994	-0.461224	-0.619607
bat	crypto	2020	1	2020-01-31	0.19535	0.218881	0.18187	0.229161	0.205066	0.207066	0.0472905	31	0	0.041225	0.229531	0.787603	0.122643	0.106849	0.789441	1.59757e+06	4.99448e+06	2.02445e+07	2.72805e+08	3.07599e+08	3.43741e+08	0	0	0.214326	0.194189	0.846027	1.58337
bat	crypto	2020	2	2020-02-29	0.223869	0.213245	0.213245	0.312055	0.258352	0.263095	0.0988107	29	0	0.0517271	0.278559	0.988245	0.206995	0.316645	0.753118	3.30495e+06	1.35857e+07	3.49248e+07	3.19867e+08	3.87528e+08	4.68083e+08	0	0	-0.025753	-0.0260904	-0.0936619	-0.126044
bat	crypto	2020	3	2020-03-31	0.210438	0.142094	0.111575	0.242029	0.163017	0.142094	0.130454	31	0	0.121913	0.678784	2.32915	0.60332	0.539002	0.870825	3.08413e+06	8.5983e+06	2.11083e+07	1.67362e+08	2.44526e+08	3.63043e+08	0	0	-0.333659	-0.405954	-0.59806	-0.672866
bat	crypto	2020	4	2020-04-30	0.143133	0.183339	0.143133	0.193527	0.165144	0.165612	0.0503944	30	0	0.0376365	0.206144	0.719045	0.12417	0.0952355	0.834289	4.08093e+06	7.46213e+06	1.85774e+07	2.14699e+08	2.47715e+08	2.9029e+08	0	0	0.290269	0.254851	1.23628	2.05243
bat	crypto	2020	5	2020-05-31	0.187463	0.210504	0.181097	0.232006	0.201265	0.203266	0.0509088	31	0	0.0579428	0.322612	1.10699	0.163613	0.203526	0.790336	4.89986e+06	1.3059e+07	6.36043e+07	2.71646e+08	3.01898e+08	3.48009e+08	0	0	0.148168	0.138168	0.428279	0.844478
bat	crypto	2020	6	2020-06-30	0.224478	0.251267	0.215042	0.271763	0.23998	0.238532	0.0567218	30	0	0.0432429	0.236851	0.826154	0.15154	0.141076	0.751037	4.79535e+06	1.51531e+07	6.20681e+07	3.22562e+08	3.5997e+08	4.07645e+08	0	0	0.193645	0.177011	0.747353	1.16808
bat	crypto	2020	7	2020-07-31	0.257078	0.252943	0.241594	0.274755	0.257268	0.258572	0.0331607	31	0	0.0255402	0.142202	0.487946	0.104558	0.0996094	0.720296	6.69334e+06	1.45862e+07	3.19691e+07	3.62391e+08	3.85902e+08	4.12132e+08	0	0	0.00667093	0.00664878	0.0467559	0.0635892
bat	crypto	2020	8	2020-08-31	0.258989	0.350199	0.243041	0.403602	0.31089	0.318452	0.160561	31	0	0.0644073	0.358605	1.2305	0.222791	0.191162	0.718621	8.13928e+06	4.58342e+07	2.44104e+08	3.64562e+08	4.66335e+08	6.05403e+08	0	0	0.384498	0.325338	0.907232	1.46028
bat	crypto	2020	9	2020-09-30	0.337183	0.239222	0.212432	0.337183	0.250051	0.24746	0.124751	30	0	0.0619733	0.339442	1.184	0.304501	0.369979	0.754058	5.14784e+06	1.47771e+07	3.79011e+07	3.18648e+08	3.75077e+08	5.05775e+08	0	0	-0.316898	-0.381111	-1.12276	-1.25159
bat	crypto	2020	10	2020-10-31	0.229258	0.185348	0.185348	0.229258	0.213917	0.2153	0.0439098	31	0	0.0253435	0.141107	0.484187	0.129641	0.19153	0.785415	3.77884e+06	7.66096e+06	1.66526e+07	2.78022e+08	3.20875e+08	3.43886e+08	0	0	-0.225205	-0.255157	-1.80826	-1.96819	0.0836157
bat	crypto	2020	11	2020-11-30	0.190579	0.243732	0.180976	0.260944	0.209891	0.20118	0.0799682	30	0	0.0529263	0.289889	1.01115	0.170273	0.141787	0.790477	3.97709e+06	1.65295e+07	5.33252e+07	2.71463e+08	3.14836e+08	3.91416e+08	0	0	0.314996	0.273834	0.944615	1.6082	0.192269
bat	crypto	2020	12	2020-12-31	0.235692	0.199555	0.194456	0.250232	0.22159	0.21841	0.0557763	31	0	0.0454399	0.252999	0.868128	0.182055	0.222898	0.77487	6.5074e+06	1.78412e+07	5.56896e+07	2.91684e+08	3.32385e+08	3.75349e+08	0	0	-0.18125	-0.199977	-0.790427	-1.09844	-0.276972
bat	crypto	2021	1	2021-01-31	0.205279	0.302078	0.20365	0.329844	0.267557	0.266914	0.126195	31	0	0.0689917	0.384129	1.31808	0.206856	0.172587	0.764226	1.51227e+07	5.84399e+07	2.41166e+08	3.05474e+08	4.01336e+08	4.94767e+08	0	0	0.513756	0.414594	1.07931	2.00426	-0.207349
bat	crypto	2021	2	2021-02-28	0.315484	0.52581	0.314725	0.62954	0.491908	0.519542	0.314815	28	0	0.0900117	0.476297	1.71967	0.235622	0.256362	0.63563	3.66332e+07	1.17704e+08	3.63182e+08	4.72087e+08	7.37862e+08	9.44309e+08	0	0	0.740645	0.554256	1.16368	2.35231	0.206174
bat	crypto	2021	3	2021-03-31	0.587107	1.13413	0.587107	1.22447	0.921071	0.972067	0.637365	31	0	0.089426	0.497903	1.70848	0.180032	0.206134	0.320281	6.05943e+07	2.21742e+08	1.37993e+09	8.80661e+08	1.38161e+09	1.83671e+09	0	0	1.15692	0.768681	1.54384	4.2697	1.0424
bat	crypto	2021	4	2021-04-30	1.15742	1.26047	1.02126	1.52747	1.28632	1.26154	0.506207	30	0	0.0682316	0.37372	1.30356	0.243078	0.331403	0.331403	7.26359e+07	1.76158e+08	5.87494e+08	1.53189e+09	1.92947e+09	2.2912e+09	0	0	0.111394	0.105615	0.282605	0.43449	0.49394
bat	crypto	2021	5	2021-05-31	1.27475	0.765302	0.561119	1.42176	1.04756	1.13236	0.860642	31	0	0.113508	0.631985	2.16856	0.502245	0.605335	0.632648	4.14469e+07	1.30112e+08	3.59834e+08	8.41679e+08	1.57134e+09	2.13264e+09	0	0	-0.392843	-0.498967	-0.789524	-0.993473	0.625245
bat	crypto	2021	6	2021-06-30	0.74829	0.611016	0.4815	0.830481	0.640206	0.645542	0.348981	30	0	0.0604954	0.331347	1.15576	0.260519	0.420215	0.684772	1.35365e+07	3.57774e+07	8.98296e+07	7.22251e+08	9.60309e+08	1.24572e+09	0	0	-0.201601	-0.225146	-0.679489	-0.864224	0.563592
bat	crypto	2021	7	2021-07-31	0.579671	0.655781	0.466283	0.655781	0.556008	0.557423	0.189498	31	0	0.041729	0.232337	0.797232	0.156163	0.241767	0.694735	1.23452e+07	2.90654e+07	1.16158e+08	6.99425e+08	8.34012e+08	9.83671e+08	0	0	0.0732625	0.0707031	0.304312	0.452752	0.536279
bat	crypto	2021	8	2021-08-31	0.660034	0.815932	0.641142	0.893244	0.759663	0.779389	0.252102	31	0	0.0449041	0.250016	0.857893	0.156982	0.110569	0.580259	1.70102e+07	5.49312e+07	1.71997e+08	9.61713e+08	1.13949e+09	1.33987e+09	0	0	0.244215	0.218505	0.873965	1.39191	0.883371
bat	crypto	2021	9	2021-09-30	0.860743	0.629574	0.583876	0.976096	0.748787	0.756228	0.39222	30	0	0.0641025	0.351104	1.22468	0.291733	0.401826	0.617749	2.03198e+07	4.70941e+07	1.46262e+08	8.75814e+08	1.12318e+09	1.46414e+09	0	0	-0.228399	-0.259288	-0.738495	-0.888786	0.872971
bat	crypto	2021	10	2021-10-31	0.678103	0.989713	0.640783	1.23494	0.736265	0.705218	0.594158	31	0	0.0944944	0.526123	1.80531	0.261394	0.198575	0.580494	1.73173e+07	1.52397e+08	2.10203e+09	9.61174e+08	1.1044e+09	1.85241e+09	0	0	0.572036	0.452371	0.859821	1.73061	0.94119
bat	crypto	2021	11	2021-11-30	1.02309	1.46865	0.967744	1.74426	1.16869	1.11072	0.776521	30	0	0.0919052	0.503385	1.75585	0.216257	0.215523	0.366439	6.72192e+07	3.82826e+08	2.1653e+09	1.45162e+09	1.75303e+09	2.6164e+09	0	0	0.48392	0.394687	0.784065	1.82508	1.70732
bat	crypto	2021	12	2021-12-31	1.4889	1.21309	1.03413	1.4889	1.22016	1.18929	0.454775	31	0	0.0682087	0.37977	1.30313	0.302046	0.305443	0.407126	8.45399e+07	1.83481e+08	5.33224e+08	1.55119e+09	1.83024e+09	2.23336e+09	0	0	-0.174013	-0.191176	-0.503399	-0.632936	1.80571
bat	crypto	2022	1	2022-01-31	1.25015	0.85168	0.714366	1.29963	0.992381	1.01534	0.585266	31	0	0.0504965	0.281153	0.964735	0.249692	0.450332	0.590448	4.21467e+07	8.81368e+07	2.40162e+08	1.07155e+09	1.48857e+09	1.94945e+09	0	0	-0.297925	-0.353715	-1.25809	-1.41661	1.54504
bat	crypto	2022	2	2022-02-28	0.846757	0.737389	0.650734	0.966568	0.797853	0.807468	0.315833	28	0	0.0507671	0.268634	0.969904	0.197085	0.326758	0.626929	2.43878e+07	4.17049e+07	7.26387e+07	9.76102e+08	1.19678e+09	1.44985e+09	0	0	-0.134195	-0.144095	-0.536399	-0.731133	1.05809
bat	crypto	2022	3	2022-03-31	0.753733	0.870962	0.635106	0.904268	0.773361	0.812215	0.269163	31	0	0.0375461	0.209048	0.717317	0.131559	0.157386	0.635889	1.9424e+07	6.15459e+07	1.72748e+08	9.52658e+08	1.16004e+09	1.3564e+09	0	0	0.181144	0.166483	0.796389	1.26546	0.721377
bat	crypto	2022	4	2022-04-30	0.892909	0.567443	0.567443	0.947836	0.751103	0.739956	0.380393	30	0	0.0486469	0.26645	0.929398	0.242916	0.401328	0.674681	1.76905e+07	4.48764e+07	1.119e+08	8.51164e+08	1.12665e+09	1.42175e+09	0	0	-0.348488	-0.428459	-1.60803	-1.76382	0.231099
bat	crypto	2022	5	2022-05-31	0.602111	0.403829	0.357797	0.650291	0.443905	0.402263	0.292494	31	0	0.0759195	0.422702	1.45044	0.361037	0.44979	0.794872	1.00036e+07	3.15733e+07	9.6844e+07	5.36696e+08	6.65857e+08	9.75437e+08	0	0	-0.288335	-0.340147	-0.804698	-0.942141	0.0702568
bat	crypto	2022	6	2022-06-30	0.38456	0.385519	0.282456	0.437782	0.368171	0.379068	0.155326	30	0	0.0724533	0.396843	1.38422	0.261043	0.297364	0.838066	9.45886e+06	3.11819e+07	1.11467e+08	4.23684e+08	5.52256e+08	6.56673e+08	0	0	-0.0453411	-0.0464012	-0.116926	-0.177753	0.130079
bat	crypto	2022	7	2022-07-31	0.402837	0.399237	0.363214	0.452317	0.401962	0.399668	0.0891039	31	0	0.0417836	0.232641	0.798275	0.165839	0.196994	0.791767	1.40977e+07	2.88781e+07	9.41445e+07	5.4482e+08	6.02943e+08	6.78476e+08	0	0	0.0355816	0.0349632	0.150288	0.210826	0.236092
bat	crypto	2022	8	2022-08-31	0.416178	0.334889	0.329426	0.467126	0.397648	0.400717	0.137701	31	0	0.0375319	0.208969	0.717047	0.170889	0.294782	0.811138	7.59344e+06	2.21957e+07	5.8693e+07	4.94139e+08	5.96473e+08	7.00689e+08	0	0	-0.161178	-0.175756	-0.841064	-1.02848	0.306302
bat	crypto	2022	9	2022-09-30	0.339883	0.303113	0.288873	0.354397	0.321307	0.317607	0.0655243	30	0	0.0379912	0.208086	0.72582	0.165058	0.184889	0.834387	4.77047e+06	1.5114e+07	3.03527e+07	4.33309e+08	4.81961e+08	5.31596e+08	0	0	-0.0948841	-0.0996923	-0.479091	-0.603983	0.260348
bat	crypto	2022	10	2022-10-31	0.300019	0.296317	0.273331	0.309295	0.290919	0.291297	0.035964	31	0	0.0238558	0.132824	0.455765	0.0884765	0.116277	0.843297	4.95329e+06	1.20581e+07	2.97843e+07	4.09997e+08	4.36378e+08	4.63943e+08	0	0	-0.0224216	-0.0226768	-0.170729	-0.256303	0.106417
bat	crypto	2022	11	2022-11-30	0.29577	0.23781	0.217988	0.338407	0.252209	0.229908	0.120419	30	0	0.0619229	0.339166	1.18304	0.276117	0.355841	0.875026	4.17001e+06	1.89641e+07	1.16635e+08	3.26982e+08	3.78313e+08	5.07611e+08	0	0	-0.197446	-0.219956	-0.648519	-0.796604	0.0633278
bat	crypto	2022	12	2022-12-31	0.230557	0.16561	0.165377	0.236937	0.203746	0.191234	0.0715598	31	0	0.0319734	0.178021	0.610852	0.173311	0.302021	0.905188	2.12724e+06	5.21447e+06	1.01347e+07	2.48066e+08	3.05619e+08	3.55405e+08	0	0	-0.303606	-0.361839	-2.03257	-2.0878	-0.0313791
bat	crypto	2023	1	2023-01-31	0.168117	0.252825	0.168117	0.272887	0.221293	0.229927	0.10477	31	0	0.0370521	0.206298	0.70788	0.129905	0.100512	0.903617	2.44823e+06	1.55397e+07	5.43537e+07	2.52175e+08	3.31939e+08	4.0933e+08	0	0	0.526629	0.423062	2.05074	3.25671	0.0554855
bat	crypto	2023	2	2023-02-28	0.271431	0.289498	0.264441	0.327152	0.29375	0.297155	0.0627111	28	0	0.0469835	0.248613	0.897619	0.171629	0.115767	0.848394	6.34057e+06	2.23753e+07	7.21393e+07	3.96661e+08	4.40625e+08	4.90728e+08	0	0	0.145054	0.135452	0.544831	0.789214	0.12091
bat	crypto	2023	3	2023-03-31	0.299309	0.268685	0.208509	0.299309	0.247474	0.247403	0.0908002	31	0	0.0508871	0.283327	0.972196	0.199607	0.303366	0.88046	5.27839e+06	1.39218e+07	3.33902e+07	3.12763e+08	3.71212e+08	4.48963e+08	0	0	-0.0718949	-0.0746103	-0.263336	-0.373785	0.26665
bat	crypto	2023	4	2023-04-30	0.271833	0.246959	0.245899	0.29375	0.269853	0.275772	0.0478519	30	0	0.0290593	0.159164	0.555177	0.127587	0.1629	0.859025	2.5295e+06	1.6826e+07	8.60222e+07	3.68848e+08	4.04779e+08	4.40626e+08	0	0	-0.0808596	-0.0843164	-0.529744	-0.660855	0.11766
bat	crypto	2023	5	2023-05-31	0.235691	0.213364	0.212106	0.243775	0.223058	0.220782	0.0316699	31	0	0.0241696	0.134571	0.461759	0.120771	0.129914	0.878398	870163	3.12193e+06	1.27654e+07	3.18158e+08	3.34587e+08	3.65663e+08	0	0	-0.136033	-0.14622	-1.08657	-1.21072	0.00508218
bat	crypto	2023	6	2023-06-30	0.213388	0.199302	0.163863	0.21841	0.188408	0.190327	0.0545479	30	0	0.0397521	0.217731	0.759463	0.18175	0.249749	0.906056	1.0673e+06	3.06755e+06	1.02139e+07	2.45794e+08	2.82612e+08	3.27616e+08	0	0	-0.0659096	-0.0681821	-0.313148	-0.375143	-0.0837714
bat	crypto	2023	7	2023-07-31	0.207604	0.205422	0.187739	0.213103	0.200421	0.199484	0.0253641	31	0	0.0273835	0.152465	0.52316	0.102036	0.0956872	0.892368	1.29789e+06	7.09664e+06	3.04031e+07	2.81609e+08	3.00632e+08	3.19655e+08	0	0	0.0307095	0.0302474	0.19839	0.296438	-0.075532
bat	crypto	2023	8	2023-08-31	0.206534	0.169749	0.167086	0.219125	0.191386	0.186169	0.052039	31	0	0.0331271	0.184444	0.632893	0.164434	0.237486	0.904208	3.54022e+06	1.31092e+07	3.24235e+07	2.50629e+08	2.87079e+08	3.28687e+08	0	0	-0.173656	-0.190744	-1.03416	-1.16	-0.241725
bat	crypto	2023	9	2023-09-30	0.165705	0.18015	0.159989	0.18015	0.170835	0.171172	0.0201609	30	0	0.0200132	0.109617	0.382351	0.0789691	0.071005	0.908277	3.65283e+06	1.1672e+07	7.11541e+07	2.39984e+08	2.56252e+08	2.70225e+08	0	0	0.0612709	0.0594672	0.542501	0.753044	-0.101667
bat	crypto	2023	10	2023-10-31	0.185375	0.207221	0.167811	0.209006	0.184359	0.180116	0.0411946	31	0	0.0281591	0.156783	0.537979	0.0963051	0.0947507	0.903793	6.67691e+06	2.0901e+07	8.548e+07	2.51716e+08	2.76538e+08	3.13508e+08	0	0	0.150267	0.139994	0.892916	1.45365	0.0426982
bat	crypto	2023	11	2023-11-30	0.212536	0.223049	0.19837	0.241663	0.219659	0.220567	0.0432933	30	0	0.0379947	0.208105	0.725887	0.148279	0.179148	0.886273	5.92355e+06	1.9251e+07	7.97019e+07	2.97554e+08	3.29489e+08	3.62494e+08	0	0	0.076386	0.0736091	0.353711	0.496425	-0.0328271
bat	crypto	2023	12	2023-12-31	0.225986	0.256266	0.22462	0.267218	0.244578	0.244647	0.0425985	31	0	0.0327493	0.18234	0.625674	0.126707	0.116679	0.871224	5.6226e+06	2.61081e+07	1.11239e+08	3.3693e+08	3.66867e+08	4.00828e+08	0	0	0.14892	0.138823	0.761339	1.09562	0.0980004
bat	crypto	2024	1	2024-01-31	0.262309	0.218331	0.210473	0.266802	0.235244	0.231326	0.0563288	31	0	0.0383114	0.213309	0.731938	0.16598	0.211126	0.879334	3.91591e+06	1.55531e+07	8.73169e+07	3.1571e+08	3.52866e+08	4.00203e+08	0	0	-0.14803	-0.160203	-0.75104	-0.965195	-0.11561
bat	crypto	2024	2	2024-02-29	0.220398	0.278123	0.21403	0.278123	0.242075	0.241398	0.0640927	29	0	0.0192183	0.103494	0.367165	0.0491005	0.0503151	0.877295	3.45853e+06	1.43149e+07	4.61277e+07	3.21045e+08	3.63113e+08	4.17184e+08	0	0	0.273859	0.242051	2.3388	4.9297	-0.215581
bat	crypto	2024	3	2024-03-31	0.298518	0.336443	0.26808	0.375005	0.327702	0.33083	0.106925	31	0	0.0583802	0.325047	1.11535	0.212375	0.28513	0.846308	1.257e+07	8.85346e+07	2.44355e+08	4.0212e+08	4.91552e+08	5.62508e+08	0	0	0.209693	0.190366	0.585657	0.89637	-0.375397
bat	crypto	2024	4	2024-04-30	0.316644	0.237929	0.237045	0.324778	0.274445	0.265012	0.0877333	30	0	0.0536612	0.293915	1.0252	0.258874	0.270133	0.8641	6.05764e+06	3.76955e+07	1.53882e+08	3.55568e+08	4.11668e+08	4.87167e+08	0	0	-0.29281	-0.346456	-1.17877	-1.33832	-0.480549
bat	crypto	2024	5	2024-05-31	0.23872	0.242811	0.222252	0.255133	0.242532	0.242969	0.0328816	31	0	0.0269579	0.150095	0.51503	0.0912902	0.112251	0.872581	3.03729e+06	7.4768e+06	1.73775e+07	3.33378e+08	3.63799e+08	3.827e+08	0	0	0.0205187	0.020311	0.135321	0.222488	-0.358367
bat	crypto	2024	6	2024-06-30	0.241363	0.196548	0.182241	0.249379	0.210057	0.210468	0.0671379	30	0	0.0344428	0.188651	0.65803	0.166924	0.26922	0.89552	1.79689e+06	2.4974e+07	8.68131e+07	2.73362e+08	3.15085e+08	3.74069e+08	0	0	-0.190533	-0.211379	-1.12048	-1.26632	-0.354831
bat	crypto	2024	7	2024-07-31	0.189067	0.193535	0.165547	0.205565	0.187645	0.189632	0.0400184	31	0	0.0350985	0.19542	0.670556	0.144709	0.127009	0.905091	1.95066e+06	2.9561e+07	2.03322e+08	2.4832e+08	2.81467e+08	3.08348e+08	0	0	-0.0153298	-0.0154485	-0.0790528	-0.106756	-0.376693
bat	crypto	2024	8	2024-08-31	0.185136	0.162757	0.153231	0.189372	0.168142	0.166158	0.0361403	31	0	0.0352585	0.196311	0.673612	0.155489	0.172329	0.912151	1.71906e+06	5.50288e+06	2.4774e+07	2.29847e+08	2.52214e+08	2.84058e+08	0	0	-0.159028	-0.173197	-0.88226	-1.11389	-0.467521
bat	crypto	2024	9	2024-09-30	0.157704	0.178953	0.152663	0.196708	0.175204	0.17348	0.0440455	30	0	0.0290682	0.159213	0.555347	0.108303	0.0902605	0.912477	1.6605e+06	4.06854e+06	1.08787e+07	2.28994e+08	2.62806e+08	2.95063e+08	0	0	0.0995115	0.0948659	0.595842	0.875932	-0.385183
bat	crypto	2024	10	2024-10-31	0.167465	0.160322	0.160322	0.183779	0.17142	0.172409	0.023457	31	0	0.0320878	0.178657	0.613036	0.146397	0.127637	0.908086	1.33738e+06	3.47668e+06	8.16091e+06	2.40483e+08	2.5713e+08	2.75669e+08	0	0	-0.104113	-0.109941	-0.615376	-0.75098	-0.510617
bat	crypto	2024	11	2024-11-30	0.159611	0.319734	0.149004	0.330104	0.214466	0.196338	0.181101	30	0	0.0602852	0.330196	1.15175	0.155124	0.0925569	0.914575	1.24418e+06	1.43186e+07	8.83008e+07	2.23505e+08	3.21699e+08	4.95156e+08	0	0	0.994326	0.690306	2.0906	4.45002	-0.447247
bat	crypto	2024	12	2024-12-31	0.320753	0.232017	0.20876	0.351105	0.276101	0.27642	0.142344	31	0	0.0689977	0.384163	1.3182	0.290869	0.405419	0.880316	5.38581e+06	2.90423e+07	2.4691e+08	3.1314e+08	4.14152e+08	5.26657e+08	0	0	-0.274345	-0.320681	-0.834753	-1.10249	-0.488386
bat	crypto	2025	1	2025-01-31	0.241754	0.221389	0.207504	0.280793	0.24188	0.245035	0.0732889	31	0	0.0429112	0.23892	0.819818	0.187207	0.261007	0.881036	3.44069e+06	1.25266e+07	6.04548e+07	3.11256e+08	3.6282e+08	4.2119e+08	0	0	-0.0458076	-0.0468899	-0.196258	-0.250471	-0.443418
bat	crypto	2025	2	2025-02-28	0.20982	0.167755	0.164254	0.20982	0.180324	0.181655	0.0455663	28	0	0.0455529	0.241044	0.870288	0.210443	0.217168	0.905832	2.68367e+06	5.71317e+06	1.98167e+07	2.46381e+08	2.70486e+08	3.1473e+08	0	0	-0.242259	-0.277413	-1.15088	-1.31824	-0.477416
bat	crypto	2025	3	2025-03-31	0.167528	0.136875	0.134406	0.181265	0.151905	0.151774	0.0468592	31	0	0.0426293	0.23735	0.814432	0.199928	0.258512	0.922944	2.01802e+06	4.82832e+06	9.77551e+06	2.01609e+08	2.27857e+08	2.71897e+08	0	0	-0.184081	-0.20344	-0.857132	-1.01757	-0.546191
bat	crypto	2025	4	2025-04-30	0.140224	0.152629	0.113669	0.152712	0.133304	0.132297	0.0390432	30	0	0.0432328	0.236796	0.825961	0.169545	0.189374	0.934833	1.84945e+06	6.29099e+06	1.66399e+07	1.70503e+08	1.99957e+08	2.29068e+08	0	0	0.115097	0.108941	0.460064	0.642551	-0.467177
bat	crypto	2025	5	2025-05-31	0.154214	0.129537	0.127888	0.168842	0.148742	0.148091	0.040954	31	0	0.0402297	0.22399	0.768588	0.164735	0.242559	0.926681	3.48384e+06	6.09772e+06	1.47199e+07	1.91831e+08	2.23112e+08	2.53262e+08	0	0	-0.151289	-0.164037	-0.732342	-0.995764	-0.464439
bat	crypto	2025	6	2025-06-30	0.129195	0.128501	0.11228	0.14315	0.127441	0.12763	0.0308696	30	0	0.0327368	0.179307	0.625436	0.117039	0.215646	0.935629	1.54086e+06	4.25731e+06	9.02184e+06	1.6842e+08	1.91162e+08	2.14725e+08	0	0	-0.00800485	-0.00803706	-0.0448229	-0.0686699	-0.452195
bat	crypto	2025	7	2025-07-31	0.121209	0.1562	0.121209	0.170802	0.149329	0.15498	0.0495924	31	0	0.0358641	0.199683	0.685184	0.140274	0.103254	0.93051	2.09626e+06	9.14969e+06	3.92496e+07	1.81814e+08	2.23994e+08	2.56203e+08	0	0	0.215556	0.195201	0.977556	1.39157	-0.396099
bat	crypto	2025	8	2025-08-31	0.148145	0.151253	0.143903	0.168928	0.15296	0.152088	0.025025	31	0	0.048971	0.272659	0.935591	0.185001	0.146457	0.917499	3.17193e+06	1.17678e+07	6.97235e+07	2.15854e+08	2.2944e+08	2.53392e+08	0	0	-0.031669	-0.0321813	-0.118028	-0.173952	-0.376588
bat	crypto	2025	9	2025-09-30	0.151419	0.139424	0.138717	0.165202	0.152821	0.154839	0.0264841	30	0	0.025506	0.139702	0.487292	0.119329	0.160314	0.920472	1.46194e+06	4.77788e+06	1.13645e+07	2.08076e+08	2.29231e+08	2.47802e+08	0	0	-0.0782033	-0.0814306	-0.582887	-0.682401	-0.369008
bat	crypto	2025	10	2025-10-31	0.151221	0.162065	0.135594	0.216005	0.168906	0.170306	0.0804109	31	0	0.0867455	0.482978	1.65727	0.302016	0.267301	0.922263	4.43073e+06	2.4836e+07	1.57513e+08	2.03391e+08	2.53359e+08	3.24008e+08	0	0	0.162388	0.150477	0.31156	0.498242	-0.2948
bat	crypto	2025	11	2025-11-30	0.191655	0.274149	0.164205	0.274149	0.204853	0.198153	0.109944	30	0	0.0655269	0.358906	1.25189	0.182946	0.274214	0.90586	1.0086e+07	2.83378e+07	7.33063e+07	2.46308e+08	3.0728e+08	4.11224e+08	0	0	0.691597	0.525673	1.46465	2.87338	0.0785374
bat	crypto	2025	12	2025-12-31	0.244575	0.20674	0.20674	0.279668	0.235507	0.226696	0.0729278	31	0	0.0580194	0.323038	1.10846	0.26443	0.260766	0.881474	4.46539e+06	1.73425e+07	5.18608e+07	3.1011e+08	3.53261e+08	4.19502e+08	0	0	-0.245885	-0.28221	-0.873611	-1.06724	0.124171
bat	crypto	2026	1	2026-01-31	0.220904	0.127939	0.127939	0.227786	0.194402	0.197442	0.0998469	31	0	0.0471582	0.262566	0.900956	0.236719	0.438336	0.926652	2.39545e+06	8.09967e+06	1.89893e+07	1.91909e+08	2.91603e+08	3.41679e+08	0	0	-0.38116	-0.479908	-1.82777	-2.02733	-0.32775
bat	crypto	2026	2	2026-02-28	0.124581	0.10623	0.10623	0.136497	0.122507	0.122358	0.0302671	28	0	0.0479796	0.253884	0.91665	0.182393	0.221741	0.939097	1.76493e+06	5.36103e+06	1.32395e+07	1.59345e+08	1.8376e+08	2.04746e+08	0	0	-0.169681	-0.185946	-0.732403	-1.01948	-0.41516
bat	crypto	2026	3	2026-03-31	0.101079	0.0960532	0.0909419	0.109009	0.0993378	0.0979625	0.0180673	31	0	0.0410646	0.228638	0.784537	0.156044	0.165741	0.947862	1.59614e+06	4.16136e+06	2.01285e+07	1.36413e+08	1.49007e+08	1.63514e+08	0	0	-0.0958011	-0.100706	-0.440461	-0.645368	-0.406262
bat	crypto	2026	4	2026-04-30	0.0994656	0.0963485	0.0942877	0.107845	0.100076	0.0995595	0.0135573	30	0	0.0337119	0.184648	0.644065	0.110553	0.106603	0.945944	1.61185e+06	3.41633e+06	1.06464e+07	1.41432e+08	1.50114e+08	1.61768e+08	0	0	0.00307372	0.00306901	0.0166209	0.0277606	-0.376903
bch	crypto	2017	8	2017-08-31	328.328	593.88	193.434	717.642	451.179	343.028	524.208	31	0	0.173819	0.952044	3.3208	0.528665	0.436099	0.436099	1.28271e+06	2.74915e+08	1.62467e+09	3.18836e+09	7.45074e+09	1.18431e+10	2	0
bch	crypto	2017	9	2017-09-30	633.428	433.598	390.866	671.064	506.991	483.612	280.198	30	0	0.084186	0.461106	1.60837	0.375501	0.417543	0.455347	6.97473e+07	2.34482e+08	6.86121e+08	6.48116e+09	8.40884e+09	1.1117e+10	0	0	-0.26989	-0.31456	-0.682185	-0.837706
bch	crypto	2017	10	2017-10-31	417.397	436.507	311.793	448.274	353.915	336.415	136.48	31	0	0.0614769	0.342289	1.17452	0.211007	0.253006	0.565531	5.75114e+07	2.27605e+08	1.3123e+09	5.20764e+09	5.91015e+09	7.50847e+09	0	0	0.00670868	0.00668627	0.019534	0.0316874
bch	crypto	2017	11	2017-11-30	531.797	1346.58	531.797	1737.34	1120.33	1214.79	1205.55	30	0	0.139536	0.76427	2.66583	0.365828	0.378146	0.378146	2.36851e+08	1.13179e+09	3.81339e+09	8.909e+09	1.88273e+10	2.92292e+10	1	0	2.0849	1.12652	1.47398	3.07937
bch	crypto	2017	12	2017-12-31	1429.45	2384.95	1276.16	3678.34	2087.19	1838.49	2402.18	31	0	0.114929	0.639897	2.19571	0.349362	0.378556	0.378556	2.94196e+08	8.2931e+08	3.82427e+09	2.14941e+10	3.51977e+10	6.20429e+10	0	0	0.771115	0.571609	0.893284	1.63615
bch	crypto	2018	1	2018-01-31	2328.67	1460.35	1451.62	2876.48	2070.99	2030.08	1424.86	31	0	0.0926992	0.516127	1.77101	0.427645	0.495348	0.60536	1.43988e+08	4.00024e+08	7.62352e+08	2.45917e+10	3.50257e+10	4.86258e+10	0	0	-0.387681	-0.490502	-0.950351	-1.14698
bch	crypto	2018	2	2018-02-28	1260.66	1199.27	875.988	1544.52	1255.88	1251.88	668.535	28	0	0.0995134	0.526576	1.9012	0.378292	0.305851	0.761853	9.26175e+07	1.81744e+08	3.89162e+08	1.48491e+10	2.13112e+10	2.62154e+10	0	0	-0.178778	-0.196961	-0.374042	-0.520659
bch	crypto	2018	3	2018-03-31	1285.41	683.045	683.045	1285.41	1017.88	1011.55	602.363	31	0	0.0581074	0.323528	1.11014	0.283473	0.468616	0.814306	2.3892e+07	8.61977e+07	1.24485e+08	1.16448e+10	1.73236e+10	2.1845e+10	0	0	-0.43045	-0.562909	-1.73991	-1.98576
bch	crypto	2018	4	2018-04-30	641.149	1344.12	608.903	1439.93	935.225	761.247	831.026	30	0	0.0704676	0.385967	1.34628	0.185501	0.141291	0.834463	3.9711e+07	1.4223e+08	4.85702e+08	1.03873e+10	1.59748e+10	2.46242e+10	0	0	0.967837	0.676935	1.75387	3.64924
bch	crypto	2018	5	2018-05-31	1336.45	992.933	884.202	1743.22	1295.34	1286.06	859.015	31	0	0.064871	0.361186	1.23936	0.272353	0.492776	0.759619	7.34943e+07	1.98923e+08	4.39743e+08	1.51668e+10	2.21876e+10	2.98328e+10	0	0	-0.261277	-0.302833	-0.83844	-1.11191
bch	crypto	2018	6	2018-06-30	1000.07	741.463	654.897	1165.95	903.253	877.74	511.049	30	0	0.0608906	0.333512	1.16331	0.282286	0.438313	0.821959	4.49806e+07	9.10379e+07	1.84332e+08	1.12699e+10	1.55215e+10	2.00123e+10	0	0	-0.25326	-0.292038	-0.875647	-1.03455
bch	crypto	2018	7	2018-07-31	738.036	772.406	673.593	865.768	771.356	772.406	192.176	31	0	0.0432623	0.240874	0.826524	0.148601	0.137699	0.816876	4.23284e+07	7.44953e+07	1.39962e+08	1.16087e+10	1.32995e+10	1.49391e+10	0	0	0.0417326	0.0408852	0.169737	0.275134
bch	crypto	2018	8	2018-08-31	765.796	543.393	503.87	765.796	584.087	557.071	261.926	31	0	0.0510967	0.284495	0.976202	0.230967	0.342031	0.863017	3.94667e+07	5.67174e+07	9.05903e+07	8.71345e+09	1.01018e+10	1.32251e+10	0	0	-0.296493	-0.351677	-1.23615	-1.52263
bch	crypto	2018	9	2018-09-30	614.487	529.085	418.804	648.175	499.074	482.13	229.371	30	0	0.0648228	0.355049	1.23844	0.230608	0.353872	0.886143	4.02935e+07	7.86234e+07	2.08336e+08	7.26789e+09	8.6593e+09	1.12311e+10	0	0	-0.0263311	-0.026684	-0.0751557	-0.115711
bch	crypto	2018	10	2018-10-31	530.487	423.198	413.487	532.117	462.707	443.614	118.63	31	0	0.0350155	0.194958	0.668969	0.187891	0.22294	0.887589	6.3169e+07	8.86596e+07	1.45059e+08	7.20683e+09	8.0534e+09	9.24872e+09	0	0	-0.200132	-0.223309	-1.14542	-1.1885
bch	crypto	2018	11	2018-11-30	422.7	170.632	170.632	624.017	373.265	377.95	453.385	30	0	0.092158	0.50477	1.76068	0.452166	0.726559	0.953612	2.90226e+07	1.13634e+08	2.73266e+08	2.98367e+09	6.51535e+09	1.08854e+10	0	0	-0.596804	-0.908332	-1.7995	-2.00884
bch	crypto	2018	12	2018-12-31	171.01	148.444	76.066	195.53	135.914	146.809	119.464	31	0	0.115344	0.642207	2.20364	0.375248	0.555195	0.979321	1.41984e+07	1.07213e+08	5.51095e+08	1.33209e+09	2.38071e+09	3.42708e+09	0	0	-0.130035	-0.139302	-0.216912	-0.371227
bch	crypto	2019	1	2019-01-31	162.913	112.933	109.131	170.641	135.341	128.667	61.5098	31	0	0.0527598	0.293754	1.00797	0.24414	0.360463	0.970331	1.06265e+07	3.49682e+07	9.43194e+07	1.91999e+09	2.37769e+09	2.99391e+09	0	0	-0.239218	-0.273408	-0.930739	-1.11988
bch	crypto	2019	2	2019-02-28	114.839	129.376	113.508	150.29	126.883	124.484	36.7824	28	0	0.0516888	0.273511	0.987512	0.174151	0.147424	0.969142	1.05712e+07	3.62201e+07	1.16028e+08	1.99863e+09	2.23617e+09	2.65088e+09	0	0	0.1456	0.135928	0.496975	0.78052
bch	crypto	2019	3	2019-03-31	130.755	168.424	122.774	171.121	146.296	152.357	48.3472	31	0	0.0351581	0.195752	0.671694	0.0833355	0.0610386	0.966622	9.82142e+06	5.99321e+07	2.09999e+08	2.16752e+09	2.58619e+09	3.02818e+09	0	0	0.30181	0.263756	1.3474	3.16499
bch	crypto	2019	4	2019-04-30	167.283	263.22	167.283	321.267	282.408	290.19	153.984	30	0	0.0891584	0.488341	1.70337	0.177794	0.279337	0.954522	4.32223e+07	3.30476e+08	1.79124e+09	2.96173e+09	5.00741e+09	5.69158e+09	0	0	0.562847	0.446509	0.91434	2.51138
bch	crypto	2019	5	2019-05-31	267.282	443.002	265.164	454.417	365.783	389.219	189.253	31	0	0.06544	0.364354	1.25023	0.143361	0.117198	0.927912	1.57124e+08	4.62844e+08	1.08154e+09	4.70951e+09	6.50673e+09	8.09289e+09	0	0	0.683006	0.520581	1.42878	3.63126
bch	crypto	2019	6	2019-06-30	432.662	403.244	379.57	481.135	422.662	414.793	101.566	30	0	0.0490024	0.268397	0.93619	0.220432	0.161891	0.89681	1.0408e+08	2.72943e+08	8.14771e+08	6.76743e+09	7.54088e+09	8.59275e+09	0	0	-0.0897462	-0.0940318	-0.350345	-0.42658
bch	crypto	2019	7	2019-07-31	416.279	328.547	281.558	421.595	344.505	321.29	140.037	31	0	0.0574089	0.319639	1.09679	0.266711	0.33216	0.923455	8.48557e+07	2.28405e+08	4.88751e+08	5.03859e+09	6.16445e+09	7.53482e+09	0	0	-0.18524	-0.204862	-0.640917	-0.768105
bch	crypto	2019	8	2019-08-31	329.548	279.087	279.071	347.784	316.712	315.737	68.7135	31	0	0.0366673	0.204155	0.700528	0.168817	0.197575	0.924131	9.50073e+07	1.5497e+08	3.57097e+08	5.01667e+09	5.68509e+09	6.2413e+09	0	0	-0.150543	-0.163157	-0.799184	-0.966475
bch	crypto	2019	9	2019-09-30	281.655	226.998	215.345	324.236	284.367	299.409	108.891	30	0	0.0576761	0.315905	1.1019	0.294023	0.335838	0.941456	6.2796e+07	1.29884e+08	4.39304e+08	3.88159e+09	5.12001e+09	5.83975e+09	0	0	-0.186638	-0.206579	-0.653929	-0.702595
bch	crypto	2019	10	2019-10-31	223.77	283.145	209.457	289.655	234.283	224.828	80.1979	31	0	0.0470269	0.261835	0.898448	0.118805	0.124259	0.943057	4.58694e+07	1.53458e+08	5.05944e+08	3.78566e+09	4.2316e+09	5.2388e+09	0	0	0.247344	0.221016	0.844107	1.86034
bch	crypto	2019	11	2019-11-30	278.387	217.58	203.852	305.931	257.086	265.564	102.079	30	0	0.0358789	0.196517	0.685466	0.174247	0.333667	0.94458	7.43362e+07	1.55538e+08	3.57011e+08	3.69603e+09	4.65685e+09	5.537e+09	0	0	-0.231561	-0.263394	-1.34031	-1.51161
bch	crypto	2019	12	2019-12-31	215.372	203.785	176.038	215.372	201.633	206.276	39.3345	31	0	0.0339732	0.189155	0.649057	0.136808	0.182635	0.952142	4.32389e+07	8.13369e+07	1.74281e+08	3.19903e+09	3.6637e+09	3.90765e+09	0	0	-0.0634019	-0.065501	-0.346283	-0.478782
bch	crypto	2020	1	2020-01-31	203.558	376.28	195.055	392.113	302.872	322.956	197.058	31	0	0.0721542	0.401737	1.3785	0.135483	0.160164	0.946972	7.79343e+07	3.85543e+08	1.26406e+09	3.55021e+09	5.5212e+09	7.15685e+09	0	0	0.846457	0.613269	1.52654	4.52655
bch	crypto	2020	2	2020-02-29	380.202	308.794	308.794	492.823	403.364	401.851	184.029	29	0	0.0526279	0.28341	1.00546	0.217349	0.373418	0.916051	2.58135e+08	5.43125e+08	1.04998e+09	5.65267e+09	7.37331e+09	9.00832e+09	0	0	-0.17935	-0.197658	-0.697429	-0.909405
bch	crypto	2020	3	2020-03-31	313.352	219.903	152.77	350.522	240.667	220.928	197.752	31	0	0.126276	0.703073	2.41249	0.61398	0.564164	0.958468	1.75292e+08	4.08569e+08	1.19792e+09	2.79985e+09	4.41188e+09	6.42029e+09	0	0	-0.287864	-0.339486	-0.482861	-0.552927
bch	crypto	2020	4	2020-04-30	224.022	250.362	215.002	267.988	237.729	236.107	52.9856	30	0	0.0446879	0.244766	0.853761	0.152487	0.197716	0.941549	1.33293e+08	2.42135e+08	6.17704e+08	3.95199e+09	4.36967e+09	4.9243e+09	0	0	0.138508	0.129719	0.529971	0.850687
bch	crypto	2020	5	2020-05-31	255.192	238.432	225.345	265.828	241.844	239.666	40.4839	31	0	0.0360736	0.200849	0.689184	0.167118	0.152293	0.938738	7.98637e+07	1.79684e+08	4.8977e+08	4.14996e+09	4.45202e+09	4.89189e+09	0	0	-0.0476506	-0.0488233	-0.243085	-0.292149
bch	crypto	2020	6	2020-06-30	253.488	222.418	216.404	257.19	240.135	238.875	40.7859	30	0	0.0279403	0.153035	0.533798	0.121014	0.158583	0.941168	5.67449e+07	1.23949e+08	3.89842e+08	3.99194e+09	4.42714e+09	4.74035e+09	0	0	-0.0671617	-0.0695234	-0.454297	-0.574509
bch	crypto	2020	7	2020-07-31	223.938	300.801	219.655	300.801	241.331	236.663	81.1462	31	0	0.0313492	0.174545	0.598926	0.0583512	0.0844589	0.940284	4.20334e+07	1.55513e+08	5.38109e+08	4.0529e+09	4.45601e+09	5.55794e+09	0	0	0.35241	0.301888	1.72957	5.17364
bch	crypto	2020	8	2020-08-31	320.01	274.592	264.348	320.01	291.273	292.074	55.6627	31	0	0.0386217	0.215036	0.737866	0.173745	0.17394	0.928134	1.31875e+08	3.23322e+08	8.24322e+08	4.8908e+09	5.38602e+09	5.91316e+09	0	0	-0.0871292	-0.091161	-0.423933	-0.524684	-0.238003
bch	crypto	2020	9	2020-09-30	292.702	227.709	207.452	292.702	228.63	226.541	85.2499	30	0	0.0474658	0.259981	0.906832	0.231715	0.291252	0.943602	1.02447e+08	2.11891e+08	5.20041e+08	3.8432e+09	4.23394e+09	5.41673e+09	0	0	-0.170739	-0.187221	-0.720134	-0.80798	-0.202807
bch	crypto	2020	10	2020-10-31	226.074	262.335	218.889	275.153	247.585	249.672	56.2643	31	0	0.026105	0.145346	0.498735	0.084333	0.077851	0.940493	6.93695e+07	2.0132e+08	4.37832e+08	4.05705e+09	4.59192e+09	5.10507e+09	0	0	0.152066	0.141557	0.973929	1.67855	-0.163864
bch	crypto	2020	11	2020-11-30	267.886	318.119	240.578	348.147	269.857	259.549	107.569	30	0	0.0621134	0.340209	1.18667	0.212814	0.238979	0.934596	1.27965e+08	3.71016e+08	1.28743e+09	4.46589e+09	5.01236e+09	6.46918e+09	0	0	0.212641	0.192801	0.566713	0.90596	-0.400793
bch	crypto	2020	12	2020-12-31	287.707	343.469	259.401	361.862	302.925	294.415	102.461	31	0	0.0530517	0.29538	1.01355	0.222555	0.202536	0.929479	1.42355e+08	5.16705e+08	1.39875e+09	4.824e+09	5.63492e+09	6.73488e+09	0	0	0.0796872	0.0766713	0.259569	0.344505	-0.499485
bch	crypto	2021	1	2021-01-31	341.435	401.027	341.435	601.46	451.199	438.667	260.025	31	0	0.0913688	0.50872	1.7456	0.3346	0.372193	0.907177	4.27226e+08	1.04751e+09	3.63062e+09	6.35585e+09	8.40534e+09	1.12017e+10	0	0	0.16758	0.154934	0.304556	0.463041	-0.379348
bch	crypto	2021	2	2021-02-28	414.74	462.328	414.74	728.223	556.915	512.017	313.483	28	0	0.0690396	0.365323	1.319	0.263956	0.365128	0.887248	5.4501e+08	1.24242e+09	3.1347e+09	7.73204e+09	1.03898e+10	1.35854e+10	0	0	0.152861	0.142246	0.389371	0.538902	-0.29717
bch	crypto	2021	3	2021-03-31	499.797	541.538	473.916	597.072	522.966	524.623	123.156	31	0	0.0389294	0.21675	0.743745	0.131812	0.206267	0.871161	3.30516e+08	5.68038e+08	9.35884e+08	8.85725e+09	9.76974e+09	1.11526e+10	0	0	0.171327	0.158137	0.729583	1.19971	-0.081295
bch	crypto	2021	4	2021-04-30	556.142	993.672	535.457	1123.06	782.985	798.31	587.604	30	0	0.0794412	0.435117	1.51772	0.207724	0.326694	0.85443	4.70947e+08	1.7434e+09	5.37919e+09	1.00119e+10	1.46504e+10	2.10133e+10	0	0	0.834908	0.606994	1.39501	2.92212	-0.104579
bch	crypto	2021	5	2021-05-31	1006.88	707.355	554.971	1519.84	1010.2	1006.88	964.871	31	0	0.139215	0.775119	2.65971	0.540959	0.63485	0.849125	7.32427e+08	2.50523e+09	7.82711e+09	1.04025e+10	1.8928e+10	2.84732e+10	0	0	-0.288141	-0.339875	-0.438481	-0.628282	-0.120606
bch	crypto	2021	6	2021-06-30	690.786	526.185	440.372	718.389	573.497	587.585	278.017	30	0	0.0542841	0.297326	1.0371	0.259724	0.387001	0.88028	2.99831e+08	4.91779e+08	7.90251e+08	8.26586e+09	1.07611e+10	1.34728e+10	0	0	-0.256123	-0.295879	-0.995134	-1.13921	-0.126531
bch	crypto	2021	7	2021-07-31	498.036	549.656	398.838	550.568	480.842	490.056	151.729	31	0	0.0345139	0.192165	0.659388	0.123774	0.245849	0.891571	1.99319e+08	2.93367e+08	6.28404e+08	7.496e+09	9.03559e+09	1.03526e+10	0	0	0.0446071	0.0436409	0.227101	0.352585	-0.125571
bch	crypto	2021	8	2021-08-31	529.107	636.439	529.107	703.412	622.811	636.439	174.305	31	0	0.0372403	0.207345	0.711475	0.133483	0.131544	0.856156	3.01709e+08	4.78563e+08	9.91649e+08	9.95015e+09	1.17212e+10	1.32373e+10	0	0	0.157885	0.146595	0.707008	1.09823	0.0682904
bch	crypto	2021	9	2021-09-30	653.7	501.121	477.192	784.163	607.227	627.903	306.972	30	0	0.0524411	0.287232	1.00189	0.244632	0.391464	0.87027	3.10383e+08	5.16549e+08	1.33147e+09	8.99892e+09	1.14439e+10	1.47727e+10	0	0	-0.212618	-0.239041	-0.832224	-0.977146	-0.0228058
bch	crypto	2021	10	2021-10-31	542.023	597.356	542.023	644.824	599.45	598.559	102.801	31	0	0.0368901	0.205395	0.704784	0.133669	0.14461	0.852645	2.83366e+08	4.37921e+08	7.62713e+08	1.02229e+10	1.13141e+10	1.21727e+10	0	0	0.19204	0.175666	0.855258	1.31419	0.166067
bch	crypto	2021	11	2021-11-30	587.692	571.566	553.313	718.84	607.943	596.846	165.527	30	0	0.0461855	0.252968	0.882372	0.186535	0.23027	0.849576	2.21316e+08	4.59093e+08	1.22646e+09	1.04598e+10	1.1491e+10	1.35831e+10	0	0	-0.0431727	-0.0441323	-0.174458	-0.23659	0.918983
bch	crypto	2021	12	2021-12-31	570.777	431.169	423.72	570.777	458.212	451.875	147.057	31	0	0.0371331	0.206748	0.709427	0.188169	0.257643	0.884807	1.08644e+08	2.90157e+08	9.17846e+08	8.01952e+09	8.6734e+09	1.07966e+10	0	0	-0.245636	-0.28188	-1.3634	-1.49802	0.753943
bch	crypto	2022	1	2022-01-31	443.446	285.17	285.17	448.067	357.69	374.262	162.898	31	0	0.0347927	0.193717	0.664713	0.190969	0.363556	0.922473	6.01043e+07	1.6893e+08	4.30406e+08	5.40976e+09	6.78037e+09	8.48847e+09	0	0	-0.338613	-0.413416	-2.13412	-2.16483	0.507337
bch	crypto	2022	2	2022-02-28	288.515	336.187	278.547	346.854	315.41	313.553	68.3065	28	0	0.0417669	0.221009	0.797955	0.133462	0.176277	0.924274	8.20359e+07	1.40245e+08	2.72512e+08	5.28466e+09	5.98761e+09	6.5828e+09	0	0	0.178903	0.164584	0.744692	1.23319	0.525667
bch	crypto	2022	3	2022-03-31	328.061	383.236	275.25	383.236	323.701	315.352	107.986	31	0	0.0406809	0.226502	0.777207	0.133375	0.160978	0.92517	6.60352e+07	1.53155e+08	4.31565e+08	5.23028e+09	6.15384e+09	7.29066e+09	0	0	0.139948	0.130983	0.578287	0.982066	0.442192
bch	crypto	2022	4	2022-04-30	376.375	277.295	277.295	378.877	328.932	327.175	101.582	30	0	0.0416105	0.22791	0.794967	0.18765	0.268113	0.924614	4.48929e+07	1.10256e+08	2.76282e+08	5.28267e+09	6.26197e+09	7.20872e+09	0	0	-0.276438	-0.323569	-1.41972	-1.72432	0.024295
bch	crypto	2022	5	2022-05-31	284.041	204.204	173.617	299.531	218.286	198.87	125.914	31	0	0.0593234	0.330299	1.13337	0.293186	0.42037	0.9528	4.24676e+07	1.30789e+08	4.42972e+08	3.31166e+09	4.16136e+09	5.70737e+09	0	0	-0.263585	-0.305962	-0.926319	-1.04357	-0.286372
bch	crypto	2022	6	2022-06-30	186.353	101.086	101.086	189.158	139.752	123.178	88.0716	30	0	0.053098	0.29083	1.01444	0.28999	0.465598	0.972519	3.37356e+07	1.0954e+08	2.37726e+08	1.93123e+09	2.66791e+09	3.60913e+09	0	0	-0.504975	-0.703146	-2.41772	-2.42473	-0.411309
bch	crypto	2022	7	2022-07-31	101.882	139.944	97.8498	154.22	117.164	111.553	56.3699	31	0	0.0558724	0.311084	1.06744	0.166133	0.124834	0.973398	3.72376e+07	9.08556e+07	3.77327e+08	1.87044e+09	2.24017e+09	2.95027e+09	0	0	0.384406	0.325271	1.04561	1.95789	-0.275633
bch	crypto	2022	8	2022-08-31	138.091	115.004	114.325	144.446	130.715	134.148	30.1207	31	0	0.0429824	0.239316	0.821177	0.198644	0.208526	0.968919	3.44125e+07	6.82764e+07	1.30517e+08	2.19024e+09	2.50277e+09	2.76534e+09	0	0	-0.178216	-0.196278	-0.820161	-0.988086	-0.28483
bch	crypto	2022	9	2022-09-30	116.783	120.226	108.92	133.077	118.978	117.639	24.1567	30	0	0.043344	0.237405	0.828087	0.179916	0.181525	0.970389	3.26693e+07	7.87194e+07	1.74648e+08	2.08907e+09	2.28139e+09	2.55108e+09	0	0	0.0454047	0.0444041	0.187039	0.246804	-0.212541
bch	crypto	2022	10	2022-10-31	117.074	115.117	106.06	122.138	112.946	112.599	16.0789	31	0	0.0221378	0.123258	0.422942	0.0892091	0.131645	0.971167	2.38115e+07	8.35758e+07	2.89216e+08	2.0369e+09	2.16885e+09	2.34415e+09	0	0	-0.042491	-0.0434201	-0.35227	-0.486723	-0.288536
bch	crypto	2022	11	2022-11-30	115.04	113.459	88.6752	123.725	108.889	109.419	35.0497	30	0	0.0522206	0.286024	0.997673	0.211778	0.283287	0.975893	6.10583e+07	1.58982e+08	4.3308e+08	1.70472e+09	2.09396e+09	2.37809e+09	0	0	-0.0144056	-0.0145104	-0.0507314	-0.068517	-0.217199
bch	crypto	2022	12	2022-12-31	110.211	96.8915	96.5308	111.977	104.9	103.312	15.4459	31	0	0.0225873	0.125761	0.43153	0.105542	0.137939	0.973757	1.85084e+07	5.47223e+07	1.63452e+08	1.86017e+09	2.0201e+09	2.15541e+09	0	0	-0.146022	-0.15785	-1.25516	-1.49561	-0.243219
bch	crypto	2023	1	2023-01-31	96.8617	133.144	96.8617	136.66	119.077	124.033	39.7981	31	0	0.0262792	0.146317	0.502064	0.0702253	0.05167	0.973667	1.66694e+07	7.48175e+07	1.62208e+08	1.86672e+09	2.29657e+09	2.63718e+09	0	0	0.374159	0.317842	2.17229	4.52603	-0.324324
bch	crypto	2023	2	2023-02-28	136.361	131.914	122.806	145.138	133.583	134.537	22.3316	28	0	0.0287479	0.152119	0.549228	0.101979	0.113318	0.966614	2.3169e+07	7.20231e+07	1.71595e+08	2.37138e+09	2.5798e+09	2.80379e+09	0	0	-0.00924166	-0.00928463	-0.0610351	-0.0910443	-0.273535
bch	crypto	2023	3	2023-03-31	134.096	124.15	110.025	136.351	125.012	124.311	26.3264	31	0	0.0362942	0.202078	0.6934	0.149674	0.179507	0.970089	2.47143e+07	6.21182e+07	9.90083e+07	2.12705e+09	2.41757e+09	2.63721e+09	0	0	-0.058855	-0.0606581	-0.300172	-0.405268	-0.192255
bch	crypto	2023	4	2023-04-30	126.372	118.327	117.076	134.466	125.135	125.225	17.3891	30	0	0.020627	0.112979	0.394078	0.0906829	0.12932	0.968171	9.97641e+06	2.45334e+07	6.52477e+07	2.26849e+09	2.42334e+09	2.60413e+09	0	0	-0.0469039	-0.0480395	-0.425209	-0.529753	-0.244942
bch	crypto	2023	5	2023-05-31	116.958	113.199	111.456	121.745	115.748	115.579	10.2896	31	0	0.0251291	0.139913	0.48009	0.0932874	0.0804782	0.9697	6.58438e+06	2.02731e+07	1.07513e+08	2.16059e+09	2.24471e+09	2.36021e+09	0	0	-0.0433342	-0.0443012	-0.316634	-0.474889	-0.24364
bch	crypto	2023	6	2023-06-30	113.358	305.651	101.796	305.651	142.328	112.582	203.855	30	0	0.0871144	0.477145	1.66432	0.136188	0.121164	0.972326	6.82362e+06	2.63607e+08	2.12683e+09	1.97683e+09	2.76456e+09	5.9407e+09	0	0	1.70012	0.993295	2.08174	7.29357	0.123856
bch	crypto	2023	7	2023-07-31	290.219	248.147	237.393	299.092	259.432	252.563	61.699	31	0	0.0281887	0.156948	0.538545	0.130612	0.206288	0.935462	3.96478e+07	2.65803e+08	8.55651e+08	4.61927e+09	5.04592e+09	5.81374e+09	0	0	-0.188137	-0.208423	-1.32797	-1.59574	-0.068841
bch	crypto	2023	8	2023-08-31	244.129	207.529	184.587	244.129	212.798	222.449	59.5422	31	0	0.0476808	0.265475	0.91094	0.184197	0.243897	0.949818	2.864e+07	1.06973e+08	3.72677e+08	3.59636e+09	4.14476e+09	4.75188e+09	0	0	-0.163685	-0.17875	-0.673319	-0.970426	-0.0987432
bch	crypto	2023	9	2023-09-30	199.384	234.618	183.769	239.357	207.182	207.952	55.5873	30	0	0.0292762	0.160353	0.559322	0.0804827	0.0783146	0.95004	2.35555e+07	7.80062e+07	2.16903e+08	3.58374e+09	4.04129e+09	4.67158e+09	0	0	0.130532	0.122688	0.765116	1.52441	0.0110964
bch	crypto	2023	10	2023-10-31	242.151	244.629	212.91	260.32	233.989	231.649	47.4106	31	0	0.0300746	0.167448	0.574574	0.106065	0.136292	0.942118	2.14527e+07	8.7204e+07	2.31536e+08	4.15765e+09	4.57061e+09	5.08656e+09	0	0	0.0426686	0.0417834	0.24953	0.393941	-0.0255117
bch	crypto	2023	11	2023-11-30	244.882	221.477	217.028	246.243	232.38	232.8	29.2149	30	0	0.017002	0.0931238	0.324823	0.0782702	0.118643	0.940998	3.20649e+07	6.70393e+07	1.89523e+08	4.24616e+09	4.54534e+09	4.8149e+09	0	0	-0.0946407	-0.0994234	-1.06765	-1.27026	-0.125986
bch	crypto	2023	12	2023-12-31	225.214	258.812	224.961	271.346	239.986	234.984	46.3856	31	0	0.0403861	0.22486	0.771575	0.12374	0.112394	0.938842	3.45137e+07	1.36135e+08	4.0802e+08	4.40689e+09	4.7007e+09	5.31845e+09	0	0	0.168573	0.155783	0.692799	1.25895	-0.0997442
bch	crypto	2024	1	2024-01-31	266.37	234.36	229.151	276.084	243.958	239.665	46.933	31	0	0.0373749	0.208095	0.714047	0.147642	0.169995	0.937703	5.49707e+07	1.2591e+08	4.38555e+08	4.49637e+09	4.78533e+09	5.41434e+09	0	0	-0.0944802	-0.0992461	-0.476928	-0.672206	-0.181655
bch	crypto	2024	2	2024-02-29	236.561	298.517	235.175	298.517	262.657	267.425	63.3416	29	0	0.0291446	0.156948	0.556806	0.0687806	0.0737964	0.936065	4.80774e+07	1.52904e+08	5.29411e+08	4.61714e+09	5.15941e+09	5.86739e+09	0	0	0.273756	0.24197	1.54172	3.51799	-0.150343
bch	crypto	2024	3	2024-03-31	316.089	679.772	316.089	679.772	457.755	436.569	363.683	31	0	0.102337	0.569786	1.95514	0.227323	0.28103	0.914068	2.24701e+08	5.92948e+08	1.97522e+09	6.21307e+09	9.00462e+09	1.33812e+10	1	0	1.27716	0.82293	1.44428	3.62009	0.0872329
bch	crypto	2024	4	2024-04-30	649.055	433.447	433.447	697.304	548.88	511.562	263.857	30	0	0.0524752	0.287419	1.00254	0.243649	0.378396	0.882163	7.92301e+07	4.52327e+08	1.25664e+09	8.53854e+09	1.08084e+10	1.37285e+10	0	0	-0.362364	-0.449988	-1.56562	-1.84687	-0.267705
bch	crypto	2024	5	2024-05-31	423.224	454.624	423.224	515.329	465.022	466.392	92.1054	31	0	0.032174	0.179137	0.614683	0.116504	0.1178	0.884942	4.70792e+07	1.36008e+08	2.84326e+08	8.33737e+09	9.16395e+09	1.01564e+10	0	0	0.0488569	0.0477009	0.266282	0.409435	-0.158758
bch	crypto	2024	6	2024-06-30	462.58	393.547	361.967	495.692	425.721	424.76	133.724	30	0	0.0320794	0.175706	0.612876	0.138955	0.269773	0.901595	4.66389e+07	1.0587e+08	2.28853e+08	7.13933e+09	8.39504e+09	9.7729e+09	0	0	-0.134345	-0.144268	-0.821078	-1.03824	-0.108849
bch	crypto	2024	7	2024-07-31	384.068	415.893	313.549	441.11	374.671	377.208	127.56	31	0	0.0431102	0.240028	0.82362	0.173666	0.183611	0.914758	6.19059e+07	1.10712e+08	2.48049e+08	6.18614e+09	7.39371e+09	8.70732e+09	0	0	0.056779	0.0552256	0.23008	0.318	-0.104706
bch	crypto	2024	8	2024-08-31	412.317	322.16	311.336	412.317	342.765	338.339	100.981	31	0	0.0442781	0.24653	0.845932	0.183631	0.244911	0.91536	2.61153e+07	9.08482e+07	3.42697e+08	6.14661e+09	6.76877e+09	8.13955e+09	0	0	-0.225377	-0.255378	-1.03589	-1.39072	-0.239498
bch	crypto	2024	9	2024-09-30	312.598	337.204	294.342	358.855	328.875	331.381	64.5134	30	0	0.0280662	0.153725	0.536203	0.100816	0.0907613	0.91998	3.44385e+07	6.08166e+07	1.52227e+08	5.81532e+09	6.49906e+09	7.09329e+09	0	0	0.0466977	0.0456401	0.296895	0.452706	-0.147655
bch	crypto	2024	10	2024-10-31	318.032	358.815	316.23	385.397	345.69	348.05	69.1668	31	0	0.0360526	0.200733	0.688785	0.113895	0.0689735	0.914029	2.60794e+07	8.39436e+07	2.30394e+08	6.25145e+09	6.83608e+09	7.6235e+09	0	0	0.064088	0.0621181	0.309457	0.545398	-0.186503
bch	crypto	2024	11	2024-11-30	349.544	525.043	328.934	525.043	439.336	440.837	196.109	30	0	0.0484739	0.265502	0.926092	0.144693	0.125121	0.910576	6.24739e+07	2.95636e+08	1.03877e+09	6.50748e+09	8.69413e+09	1.03934e+10	0	0	0.463268	0.380672	1.43378	2.63089	-0.0335995
bch	crypto	2024	12	2024-12-31	532.133	433.892	433.892	620.949	510.51	529.308	187.057	31	0	0.0435447	0.242446	0.83192	0.20391	0.301243	0.882041	4.0552e+07	2.5294e+08	8.08278e+08	8.59509e+09	1.01092e+10	1.22943e+10	0	0	-0.173605	-0.190683	-0.786494	-0.93513	0.00271002
bch	crypto	2025	1	2025-01-31	449.399	423.529	409.357	490.189	444.612	438.271	80.8328	31	0	0.0396863	0.220964	0.758207	0.16818	0.164901	0.888712	4.7187e+07	1.00748e+08	2.42248e+08	8.11417e+09	8.81057e+09	9.71406e+09	0	0	-0.0238846	-0.0241745	-0.109405	-0.143742	0.18862
bch	crypto	2025	2	2025-02-28	404.138	316.05	292.251	404.138	326.198	325.045	111.887	28	0	0.0412899	0.218486	0.788842	0.20263	0.276853	0.920548	3.41404e+07	8.28815e+07	3.6889e+08	5.79652e+09	6.46826e+09	8.01142e+09	0	0	-0.253769	-0.29272	-1.33977	-1.4446	-0.027274
bch	crypto	2025	3	2025-03-31	310.757	303.06	298.53	395.318	336.488	333.174	96.7885	31	0	0.0516829	0.287758	0.987401	0.163536	0.244837	0.918841	4.1576e+07	1.31782e+08	5.50729e+08	5.92554e+09	6.67683e+09	7.84251e+09	0	0	-0.0411029	-0.0419715	-0.145857	-0.25665	-0.100723
bch	crypto	2025	4	2025-04-30	308.755	366.484	268.897	373.999	327.051	334.581	105.102	30	0	0.0467429	0.256021	0.893022	0.157111	0.129092	0.926897	2.84191e+07	9.08061e+07	1.84207e+08	5.33845e+09	6.49424e+09	7.42797e+09	0	0	0.20928	0.190026	0.742225	1.2095	0.149735
bch	crypto	2025	5	2025-05-31	361.036	414.778	353.785	444.308	401.151	407.57	90.5228	31	0	0.036695	0.204309	0.701056	0.107687	0.0999743	0.903819	4.71066e+07	1.04129e+08	3.16534e+08	7.02806e+09	7.97106e+09	8.82976e+09	0	0	0.131776	0.123788	0.605888	1.14952	0.480783
bch	crypto	2025	6	2025-06-30	404.476	506.461	385.592	506.461	448.401	454.14	120.869	30	0	0.0334426	0.183173	0.63892	0.0965283	0.0903353	0.895173	4.78798e+07	1.62175e+08	3.21337e+08	7.66533e+09	8.91624e+09	1.00739e+10	0	0	0.22104	0.199703	1.09024	2.06885	1.28324
bch	crypto	2025	7	2025-07-31	500.93	562.339	484.78	590.562	522.565	512.294	105.781	31	0	0.0313837	0.174737	0.599584	0.1039	0.0660931	0.868207	6.98181e+07	2.01316e+08	4.32839e+08	9.6435e+09	1.03981e+10	1.1754e+10	0	0	0.11033	0.104658	0.598945	1.00729	1.06432
bch	crypto	2025	8	2025-08-31	535.014	544.6	520.255	618.867	568.392	569.83	98.6121	31	0	0.0354802	0.197545	0.677848	0.133479	0.141212	0.858563	4.99281e+07	1.43463e+08	3.79641e+08	1.03561e+10	1.13179e+10	1.23219e+10	0	0	-0.0315446	-0.0320529	-0.162256	-0.240134	1.22574
bch	crypto	2025	9	2025-09-30	542.783	559.221	536.466	624.243	582.577	591.024	87.7771	30	0	0.0251489	0.137746	0.480468	0.0875104	0.140614	0.854156	3.11612e+07	1.29554e+08	3.22751e+08	1.06919e+10	1.16084e+10	1.24394e+10	0	0	0.0268469	0.0264928	0.192331	0.302739	1.2077
bch	crypto	2025	10	2025-10-31	592.306	538.206	468.059	609.268	537.037	540.46	141.209	31	0	0.0388652	0.216392	0.742519	0.155838	0.231768	0.872753	7.13161e+07	1.75568e+08	3.89165e+08	9.33339e+09	1.07083e+10	1.21451e+10	0	0	-0.0375798	-0.0383041	-0.177012	-0.245795	1.21284
bch	crypto	2025	11	2025-11-30	554.256	543.199	471.051	557.562	514.409	510.317	86.5109	30	0	0.0450139	0.246551	0.859989	0.163116	0.15012	0.871939	5.86744e+07	1.65598e+08	3.83763e+08	9.3971e+09	1.02644e+10	1.11272e+10	0	0	0.00927813	0.00923535	0.0374581	0.0566183	1.23682
bch	crypto	2025	12	2025-12-31	523.772	598.689	523.772	624.728	579.433	581.269	100.956	31	0	0.0355485	0.197925	0.679153	0.110637	0.103	0.857607	6.67135e+07	1.61628e+08	3.57948e+08	1.04549e+10	1.15699e+10	1.24752e+10	0	0	0.102154	0.0972665	0.49143	0.87915	1.50677
bch	crypto	2026	1	2026-01-31	592.388	505	505	654.364	601.9	597.309	149.364	31	0	0.0299943	0.167001	0.57304	0.136722	0.228259	0.86271	3.92613e+07	1.53203e+08	3.93191e+08	1.00941e+10	1.20268e+10	1.30715e+10	0	0	-0.15649	-0.170184	-1.01906	-1.24474	1.00964
bch	crypto	2026	2	2026-02-28	517.152	457.264	457.264	570.242	526.025	527.141	112.978	28	0	0.0546487	0.289174	1.04406	0.212229	0.198123	0.875688	6.11036e+07	1.23935e+08	2.85076e+08	9.1457e+09	1.05178e+10	1.1404e+10	0	0	-0.0945275	-0.0992983	-0.343387	-0.467883	0.926455
bch	crypto	2026	3	2026-03-31	440.935	466.425	440.935	480.953	461.102	461.82	40.0176	31	0	0.0228167	0.127038	0.435912	0.094323	0.0627818	0.880127	3.4269e+07	6.25689e+07	1.15455e+08	8.8193e+09	9.22577e+09	9.62556e+09	0	0	0.0200349	0.0198369	0.156149	0.210308	1.00072
bch	crypto	2026	4	2026-04-30	454.184	441.116	420.856	461.134	445.014	444.283	40.2782	30	0	0.0192662	0.105525	0.36808	0.0750219	0.0733804	0.885586	1.89818e+07	3.78639e+07	6.55569e+07	8.42558e+09	8.90992e+09	9.23398e+09	0	0	-0.0542611	-0.0557887	-0.528677	-0.743633	0.993486
bnb	crypto	2017	7	2017-07-31	0.0767791	0.104482	0.0748069	0.11961	0.104049	0.107187	0.0448034	17	0	0.0734094	0.293638	1.40248	0.121778	0.12648	0.12648	148889	300569	683084	1.49614e+07	2.08098e+07	2.39221e+07	0	0
bnb	crypto	2017	8	2017-08-31	0.0998116	2.20584	0.0998116	2.70366	1.35397	1.43243	2.60385	31	0	0.183274	1.02043	3.50145	0.261326	0.24944	0.24944	258368	2.52128e+07	7.15785e+07	1.99623e+07	2.70794e+08	5.40733e+08	2	0	20.1122	3.04985	2.9888	11.6707
bnb	crypto	2017	9	2017-09-30	2.32302	1.28538	0.69418	2.32302	1.05278	0.963605	1.62884	30	0	0.153398	0.840198	2.93067	0.661082	0.701174	0.743245	1.25415e+06	7.3413e+06	2.64927e+07	1.38836e+08	2.10557e+08	4.64604e+08	0	0	-0.417286	-0.540059	-0.642776	-0.816931
bnb	crypto	2017	10	2017-10-31	1.52141	1.31091	1.16607	1.96579	1.39423	1.34783	0.79972	31	0	0.0846609	0.471372	1.61744	0.302101	0.406819	0.568707	1.30209e+06	4.8637e+06	1.74791e+07	2.32064e+08	2.78293e+08	3.93158e+08	0	0	0.0198676	0.0196728	0.0417352	0.0651199
bnb	crypto	2017	11	2017-11-30	1.26034	1.94494	1.26034	1.99886	1.67033	1.63145	0.738528	30	0	0.0726507	0.397924	1.38799	0.223684	0.244134	0.533841	2.12204e+06	1.33237e+07	4.95556e+07	2.50824e+08	3.32418e+08	3.97802e+08	0	0	0.483653	0.394507	0.991413	1.76368
bnb	crypto	2017	12	2017-12-31	2.06479	8.65658	2.06479	9.81384	4.77665	4.59697	7.74905	31	0	0.106637	0.593729	2.03729	0.236132	0.229752	0.2363	1.51818e+07	5.134e+07	1.62578e+08	4.10921e+08	9.5062e+08	1.95309e+09	0	0	3.45082	1.49309	2.51477	6.3231
bnb	crypto	2018	1	2018-01-31	8.42506	10.9489	8.42506	22.3524	14.9803	13.9947	13.9274	31	0	0.150804	0.839638	2.8811	0.465401	0.510169	0.510169	4.76137e+07	1.77312e+08	5.1841e+08	1.67671e+09	2.96753e+09	4.44844e+09	1	0	0.264807	0.23492	0.279787	0.504769
bnb	crypto	2018	2	2018-02-28	9.30772	10.4221	6.66932	11.7462	9.55516	9.49058	5.07685	28	0	0.099959	0.528933	1.90971	0.374082	0.309554	0.701629	1.45758e+06	6.13345e+07	1.009e+08	1.31514e+09	1.8842e+09	2.31626e+09	0	0	-0.0481152	-0.0493113	-0.0932278	-0.131819
bnb	crypto	2018	3	2018-03-31	10.4865	11.0452	7.66289	13.3206	9.91677	10.0508	5.65772	31	0	0.0768405	0.42783	1.46804	0.250347	0.269263	0.657178	3.61299e+07	9.14057e+07	2.48623e+08	1.51106e+09	1.95551e+09	2.62672e+09	0	0	0.059784	0.0580651	0.13572	0.231939
bnb	crypto	2018	4	2018-04-30	11.0447	14.2352	11.0447	15.3865	12.9953	12.7325	4.34184	30	0	0.0596357	0.326638	1.13934	0.203286	0.135077	0.505884	7.11587e+07	9.97416e+07	1.52704e+08	2.17793e+09	2.54659e+09	2.99994e+09	0	0	0.288816	0.253724	0.776772	1.24811
bnb	crypto	2018	5	2018-05-31	14.1224	14.0623	11.833	15.2294	13.4571	13.5119	3.3964	31	0	0.0587652	0.327191	1.12271	0.185625	0.223016	0.470618	3.18179e+07	6.91398e+07	2.3077e+08	2.3071e+09	2.62375e+09	2.9693e+09	0	0	-0.0121478	-0.0122222	-0.0373551	-0.0658435
bnb	crypto	2018	6	2018-06-30	14.2106	14.5903	13.9983	17.1726	15.2927	15.1148	3.17431	30	0	0.0521317	0.285537	0.995974	0.207593	0.184847	0.373745	3.74508e+07	8.4431e+07	1.54359e+08	2.72928e+09	2.98165e+09	3.34818e+09	0	0	0.0375502	0.0368623	0.129098	0.17757
bnb	crypto	2018	7	2018-07-31	14.3511	13.8073	11.9496	14.619	13.1718	13.2294	2.66945	31	0	0.0390404	0.217368	0.745866	0.157488	0.179589	0.465401	2.0329e+07	4.62356e+07	7.75266e+07	2.29962e+09	2.55329e+09	2.83984e+09	0	0	-0.0536679	-0.0551618	-0.253771	-0.350259
bnb	crypto	2018	8	2018-08-31	13.5729	10.9684	9.29683	14.0645	11.2912	10.9684	4.76769	31	0	0.0525495	0.292583	1.00396	0.234241	0.338987	0.584079	1.22056e+07	3.35056e+07	6.8858e+07	1.78911e+09	2.17291e+09	2.70662e+09	0	0	-0.205606	-0.230176	-0.786701	-0.982645
bnb	crypto	2018	9	2018-09-30	11.409	9.98606	9.17635	11.409	10.0302	9.96588	2.23265	30	0	0.0340141	0.186303	0.649838	0.154557	0.195692	0.589469	1.10104e+07	2.07291e+07	3.34045e+07	1.76593e+09	1.93025e+09	2.19558e+09	0	0	-0.0895623	-0.0938298	-0.503642	-0.60709
bnb	crypto	2018	10	2018-10-31	9.90263	9.38548	9.20959	10.5959	9.81154	9.66116	1.38628	31	0	0.0274804	0.153005	0.525013	0.117604	0.130832	0.587982	1.90634e+07	2.69847e+07	4.76144e+07	1.77232e+09	1.88054e+09	2.0391e+09	0	0	-0.0601411	-0.0620256	-0.405384	-0.527411
bnb	crypto	2018	11	2018-11-30	9.50539	5.02382	4.81845	9.76334	7.59872	7.97591	4.94489	30	0	0.0578867	0.317059	1.10592	0.307533	0.506475	0.784433	7.30486e+06	1.54802e+07	2.49635e+07	9.19357e+08	1.44983e+09	1.86284e+09	0	0	-0.464725	-0.624974	-1.97116	-2.03222
bnb	crypto	2018	12	2018-12-31	5.21048	6.06637	4.46139	6.12033	5.27635	5.21048	1.65895	31	0	0.0701458	0.390555	1.34013	0.278852	0.2518	0.800407	9.18398e+06	1.97838e+07	5.71026e+07	8.5123e+08	1.00672e+09	1.16776e+09	0	0	0.207521	0.18857	0.482824	0.676235
bnb	crypto	2019	1	2019-01-31	5.99805	6.19994	5.50871	7.00545	6.24548	6.19994	1.49674	31	0	0.0449887	0.250486	0.859508	0.192226	0.166668	0.753552	1.97078e+07	3.57108e+07	7.71646e+07	1.05106e+09	1.18624e+09	1.32526e+09	0	0	0.0220193	0.0217804	0.0869524	0.113306
bnb	crypto	2019	2	2019-02-28	6.48028	10.2225	6.48028	10.8009	8.97566	9.12674	4.32059	28	0	0.0451511	0.238917	0.86261	0.117338	0.130519	0.710086	4.31815e+07	7.5481e+07	1.23867e+08	1.22591e+09	1.69798e+09	2.04326e+09	0	0	0.648806	0.500051	2.09299	4.26165
bnb	crypto	2019	3	2019-03-31	11.2991	17.4365	11.2991	17.4365	14.8723	15.04	6.13737	31	0	0.0531104	0.295706	1.01467	0.110154	0.10042	0.4945	6.30079e+07	1.14943e+08	2.04288e+08	2.13752e+09	2.81347e+09	3.29856e+09	0	0	0.705697	0.533974	1.80576	4.84753
bnb	crypto	2019	4	2019-04-30	17.8552	21.8032	17.5924	24.9343	20.5871	19.6616	7.34187	30	0	0.0450443	0.246718	0.860571	0.129949	0.143279	0.212953	8.15524e+07	1.25279e+08	2.28331e+08	3.32805e+09	3.77762e+09	4.69626e+09	0	0	0.250435	0.223492	0.905858	1.71984
bnb	crypto	2019	5	2019-05-31	21.6097	32.8549	18.6534	35.2533	26.9227	26.308	16.6	31	0	0.0579969	0.322913	1.10803	0.152993	0.200195	0.251898	7.90146e+07	2.22383e+08	4.08929e+08				0	0	0.506883	0.410043	1.26983	2.68014
bnb	crypto	2019	6	2019-06-30	32.9895	32.031	29.0736	38.7311	33.7324	33.4356	9.65742	30	0	0.0445667	0.244102	0.851446	0.181906	0.172988	0.175294	1.63081e+08	2.40424e+08	4.03897e+08	4.49541e+09	4.97656e+09	5.3119e+09	0	0	-0.0250758	-0.0253956	-0.104037	-0.139609
bnb	crypto	2019	7	2019-07-31	33.1459	27.6983	25.1026	33.509	30.0691	29.3895	8.40635	31	0	0.0462439	0.257475	0.883488	0.191252	0.250869	0.351874	6.82226e+07	1.62511e+08	3.92019e+08	3.50274e+09	4.38342e+09	4.85252e+09	0	0	-0.135267	-0.145334	-0.564459	-0.759908
bnb	crypto	2019	8	2019-08-31	28.7957	21.1681	21.1681	31.3736	27.2764	27.5764	10.2054	31	0	0.0383724	0.213648	0.733103	0.179198	0.325287	0.453458	5.81534e+07	8.92503e+07	1.98227e+08	3.29242e+09	4.24248e+09	4.87974e+09	0	0	-0.23576	-0.268874	-1.25849	-1.50043
bnb	crypto	2019	9	2019-09-30	21.5058	15.7935	15.2597	22.7971	20.0863	20.9922	7.53737	30	0	0.0448023	0.245392	0.855947	0.2218	0.330629	0.606009	3.15918e+07	6.37043e+07	1.47742e+08	2.37344e+09	3.12416e+09	3.54578e+09	0	0	-0.2539	-0.292896	-1.19358	-1.32054
bnb	crypto	2019	10	2019-10-31	15.8211	19.9356	15.0476	20.7269	17.7118	18.1556	5.6793	31	0	0.0399944	0.222679	0.764092	0.125511	0.0995197	0.611486	2.61851e+07	6.00533e+07	1.03798e+08	2.34045e+09	2.75483e+09	3.22379e+09	0	0	0.26226	0.232904	1.04591	1.85564
bnb	crypto	2019	11	2019-11-30	20.0065	15.7209	15.1773	21.3084	18.6625	19.8728	6.13116	30	0	0.0345313	0.189136	0.659719	0.163265	0.287734	0.608137	3.61969e+07	5.50353e+07	8.99438e+07	2.32933e+09	2.86422e+09	3.27031e+09	0	0	-0.211416	-0.237517	-1.2558	-1.45479
bnb	crypto	2019	12	2019-12-31	15.499	13.6624	12.3401	15.6706	14.2327	14.0786	3.33052	31	0	0.031301	0.174277	0.598004	0.131715	0.212533	0.68139	2.31993e+07	3.52824e+07	5.442e+07	1.89389e+09	2.18436e+09	2.40504e+09	0	0	-0.130938	-0.140341	-0.805277	-1.06549
bnb	crypto	2020	1	2020-01-31	13.6315	18.1638	12.975	18.5825	16.2404	16.959	5.60746	31	0	0.0344537	0.19183	0.658236	0.093078	0.0648986	0.664997	2.6479e+07	4.89508e+07	9.67943e+07	1.99134e+09	2.49249e+09	2.85194e+09	0	0	0.329475	0.284784	1.48456	3.05963
bnb	crypto	2020	2	2020-02-29	18.1889	19.4606	18.1014	26.5536	21.9331	22.0974	8.45222	29	0	0.0470275	0.253251	0.89846	0.176002	0.297174	0.532638	4.22452e+07	1.06747e+08	2.04405e+08	2.77811e+09	3.36618e+09	4.07531e+09	0	0	0.0713915	0.0689583	0.272292	0.391804
bnb	crypto	2020	3	2020-03-31	18.9446	12.6133	9.37377	21.3662	14.1158	12.3361	11.9924	31	0	0.118794	0.661418	2.26956	0.589579	0.56128	0.757978	4.56753e+07	9.62143e+07	2.04138e+08	1.41786e+09	2.13931e+09	3.23181e+09	0	0	-0.351853	-0.433638	-0.655619	-0.735504
bnb	crypto	2020	4	2020-04-30	12.724	17.0317	12.724	17.3723	15.1915	15.1489	4.64828	30	0	0.0415504	0.227581	0.793819	0.14238	0.0935036	0.671477	6.91436e+07	9.14945e+07	1.19784e+08	1.92461e+09	2.27603e+09	2.56909e+09	0	0	0.350295	0.300323	1.31963	2.1093
bnb	crypto	2020	5	2020-05-31	17.4899	16.9854	15.0629	17.7244	16.5942	16.631	2.66151	31	0	0.0315197	0.175494	0.602184	0.13722	0.141592	0.61109	5.4008e+07	7.10433e+07	1.02726e+08	2.22756e+09	2.45401e+09	2.62116e+09	0	0	-0.00271636	-0.00272006	-0.0154994	-0.0198227
bnb	crypto	2020	6	2020-06-30	17.9738	15.4273	15.1293	17.9738	16.5529	16.4045	2.84451	30	0	0.0224585	0.123011	0.42907	0.0971755	0.158258	0.609375	3.08006e+07	5.00013e+07	8.82813e+07	2.23738e+09	2.44791e+09	2.65804e+09	0	0	-0.091734	-0.096218	-0.782193	-0.990147
bnb	crypto	2020	7	2020-07-31	15.8304	20.6636	15.2985	20.6636	17.8159	17.6291	5.36508	31	0	0.0236795	0.131842	0.452396	0.0671784	0.0681079	0.605007	3.4901e+07	7.64214e+07	1.51789e+08	2.2624e+09	2.63468e+09	3.05581e+09	0	0	0.33942	0.292237	2.21657	4.35016	7.36072
bnb	crypto	2020	8	2020-08-31	21.5877	23.2117	20.8898	23.6246	22.4872	22.5457	2.73483	31	0	0.0314389	0.175044	0.600639	0.117792	0.0927029	0.460645	6.74464e+07	1.08014e+08	1.8149e+08	3.08926e+09	3.3255e+09	3.4937e+09	0	0	0.123314	0.116283	0.664309	0.987192	1.81698
bnb	crypto	2020	9	2020-09-30	24.889	29.3435	19.248	30.9041	25.3994	25.1511	11.6561	30	0	0.0721416	0.395136	1.37826	0.267114	0.262918	0.503035	1.19286e+08	2.1553e+08	5.1642e+08	2.84647e+09	3.75616e+09	4.57023e+09	0	0	0.26417	0.234416	0.593254	0.877588	2.80138
bnb	crypto	2020	10	2020-10-31	27.3145	28.4035	27.2282	31.6002	29.4571	29.8881	4.37201	31	0	0.0295895	0.164747	0.565307	0.120501	0.10116	0.296994	7.85287e+07	1.27854e+08	2.15085e+08	4.02661e+09	4.35623e+09	4.67316e+09	0	0	-0.0320355	-0.0325598	-0.197635	-0.270203	2.7267
bnb	crypto	2020	11	2020-11-30	28.3871	31.423	26.8513	33.7682	28.7927	28.2076	6.91696	30	0	0.0383415	0.210005	0.732512	0.148486	0.168151	0.306725	8.01319e+07	1.40154e+08	4.32406e+08	3.97087e+09	4.25798e+09	4.99378e+09	0	0	0.106306	0.101027	0.481069	0.680378	2.33045
bnb	crypto	2020	12	2020-12-31	30.1309	37.3391	27.3848	38.62	31.4545	30.4986	11.2352	31	0	0.0361057	0.201028	0.689799	0.126481	0.107055	0.292949	6.55787e+07	1.5239e+08	4.3498e+08	4.04978e+09	4.65161e+09	5.71128e+09	0	0	0.188275	0.172503	0.858102	1.36387	0.957516
bnb	crypto	2021	1	2021-01-31	37.7985	44.2354	37.7985	45.9904	41.7077	41.645	8.19189	31	0	0.0409058	0.227754	0.781505	0.156927	0.15417	0.15417	1.73105e+08	2.73e+08	4.34775e+08	5.58979e+09	6.16791e+09	6.80124e+09	0	0	0.184694	0.169484	0.744155	1.08002	0.903951
bnb	crypto	2021	2	2021-02-28	51.4939	211.684	51.1277	334.959	157.54	135.139	283.831	28	0	0.158168	0.836949	3.0218	0.358784	0.36803	0.36803	3.42696e+08	2.84896e+09	1.16999e+10	7.56097e+09	2.38179e+10	4.95351e+10	1	0	3.78539	1.56557	1.87057	4.36354	2.63609
bnb	crypto	2021	3	2021-03-31	255.685	302.394	225.203	309.789	260.557	261.944	84.5866	31	0	0.0667002	0.371371	1.27431	0.166643	0.196224	0.32767	1.06427e+09	1.89041e+09	4.0104e+09	3.48014e+10	4.02649e+10	4.78729e+10	0	0	0.428515	0.356636	0.960321	2.14011	3.07154
bnb	crypto	2021	4	2021-04-30	336.433	623.831	323.056	623.831	488.944	511.341	300.775	30	0	0.066701	0.365336	1.27432	0.183926	0.196632	0.196632	2.06421e+09	4.26646e+09	1.07134e+10	4.9923e+10	7.55583e+10	9.64029e+10	0	0	1.06297	0.724149	1.98214	3.93717	3.85193
bnb	crypto	2021	5	2021-05-31	620.269	353.583	261.558	673.619	495.53	558.641	412.061	31	0	0.109062	0.607231	2.08362	0.494823	0.611712	0.611712	2.06309e+09	3.6184e+09	8.43424e+09	4.04196e+10	7.6576e+10	1.04097e+11	0	0	-0.433207	-0.567762	-0.935002	-1.1474	2.94296
bnb	crypto	2021	6	2021-06-30	361.453	302.991	261.549	428.004	339.643	345.545	166.454	30	0	0.0652655	0.357474	1.2469	0.283468	0.388908	0.611725	6.73229e+08	1.66018e+09	3.27248e+09	4.04182e+10	5.24862e+10	6.6141e+10	0	0	-0.143084	-0.154415	-0.431961	-0.544735	2.66697
bnb	crypto	2021	7	2021-07-31	288.3	335.81	264.524	335.81	306.157	308.305	71.2857	31	0	0.0351568	0.195745	0.671669	0.13139	0.194049	0.607309	5.26801e+08	8.49827e+08	1.64344e+09	4.08779e+10	4.73116e+10	5.18939e+10	0	0	0.108317	0.102842	0.52539	0.782728	2.9825
bnb	crypto	2021	8	2021-08-31	333.152	464.595	323.485	502.982	412.536	409.464	179.497	31	0	0.0381978	0.212677	0.729769	0.101214	0.0819893	0.51978	6.43992e+08	1.27026e+09	2.5127e+09	4.99893e+10	6.37507e+10	7.77277e+10	0	0	0.383506	0.324621	1.52636	3.20727	4.03489
bnb	crypto	2021	9	2021-09-30	489.222	386.136	333.977	503.296	408.981	407.101	169.319	30	0	0.0547768	0.300025	1.04651	0.24505	0.336421	0.504206	6.63987e+08	1.1974e+09	3.20448e+09	5.16106e+10	6.32013e+10	7.77761e+10	0	0	-0.168876	-0.184976	-0.616535	-0.754849	3.86558
bnb	crypto	2021	10	2021-10-31	420.272	525.482	404.76	529.009	462.684	469.665	124.249	31	0	0.037575	0.209209	0.71787	0.109853	0.100855	0.399126	6.08043e+08	1.27029e+09	3.53274e+09	6.2549e+10	7.5547e+10	8.8946e+10	0	0	0.360873	0.308127	1.47282	2.80489	4.58635
bnb	crypto	2021	11	2021-11-30	550.69	625.157	530.961	653.757	603.785	604.805	122.796	30	0	0.0455748	0.249623	0.870705	0.161951	0.187831	0.211778	1.29955e+09	1.73458e+09	3.03051e+09	8.92742e+10	1.01519e+11	1.09921e+11	0	0	0.189682	0.173686	0.695793	1.07246	6.48038
bnb	crypto	2021	12	2021-12-31	627.493	512.636	512.636	627.493	552.984	547.013	114.856	31	0	0.0309319	0.172222	0.590954	0.146332	0.18304	0.238982	6.5588e+08	1.21811e+09	2.99943e+09	8.61931e+10	9.29771e+10	1.05505e+11	0	0	-0.179987	-0.198436	-1.15221	-1.35607	5.49963
bnb	crypto	2022	1	2022-01-31	526.491	375.66	357.269	531.655	442.306	447.468	174.386	31	0	0.0449756	0.250413	0.859257	0.210287	0.328006	0.469627	6.20664e+08	1.15554e+09	2.33194e+09	6.00702e+10	7.4368e+10	8.93909e+10	0	0	-0.267199	-0.310881	-1.24147	-1.47837	4.75202
bnb	crypto	2022	2	2022-02-28	385.94	395.212	357.97	433.783	394.652	399.21	75.8129	28	0	0.0415028	0.219612	0.792911	0.140137	0.174772	0.468587	5.00488e+08	8.2548e+08	1.50887e+09	6.0188e+10	6.63555e+10	7.2935e+10	0	0	0.0520465	0.0507373	0.231031	0.362054	3.86527
bnb	crypto	2022	3	2022-03-31	408.131	429.478	361.632	443.187	397.391	396.246	81.5555	31	0	0.0258945	0.144175	0.494714	0.109192	0.116416	0.463151	4.19907e+08	7.67304e+08	1.45147e+09	6.08037e+10	6.68162e+10	7.45162e+10	0	0	0.0867022	0.0831476	0.576715	0.761478	3.09948
bnb	crypto	2022	4	2022-04-30	445.929	378.454	378.454	449.479	415.657	416.728	71.0251	30	0	0.0293968	0.161013	0.561626	0.12921	0.158016	0.438178	3.48996e+08	7.94864e+08	1.25974e+09	6.36321e+10	6.98873e+10	7.55741e+10	0	0	-0.118805	-0.126476	-0.785504	-0.978842	2.57948
bnb	crypto	2022	5	2022-05-31	390.022	321.25	268.657	402.242	324.838	312.167	133.585	31	0	0.0564431	0.314262	1.07834	0.266752	0.332102	0.601174	4.621e+08	9.19869e+08	2.32002e+09	4.51711e+10	5.46173e+10	6.76317e+10	0	0	-0.151152	-0.163875	-0.52146	-0.614335	1.84772
bnb	crypto	2022	6	2022-06-30	300.832	215.327	197.202	308.178	249.47	234.241	110.976	30	0	0.0491522	0.269218	0.939052	0.240285	0.360104	0.70725	2.81551e+08	5.63026e+08	1.28845e+09	3.21985e+10	4.08314e+10	5.18161e+10	0	0	-0.329722	-0.400063	-1.48602	-1.66495	1.3535
bnb	crypto	2022	7	2022-07-31	217.61	283.487	217.61	295.434	248.921	247.938	77.8233	31	0	0.0328908	0.183128	0.628378	0.0957789	0.0895555	0.676953	2.20259e+08	4.17356e+08	8.70048e+08	3.55308e+10	4.06431e+10	4.82375e+10	0	0	0.316544	0.27501	1.50174	2.8713	1.78651
bnb	crypto	2022	8	2022-08-31	283.665	278.738	277.228	328.035	302.682	301.47	50.8072	31	0	0.0279252	0.155481	0.53351	0.114391	0.154884	0.58845	2.68418e+08	4.59131e+08	7.47754e+08	4.52649e+10	4.9421e+10	5.35606e+10	0	0	-0.0167508	-0.0168927	-0.108648	-0.147675	2.0767
bnb	crypto	2022	9	2022-09-30	278.311	283.903	263.89	297.518	277.933	277.046	33.6278	30	0	0.0254522	0.139408	0.486264	0.0980868	0.112514	0.60825	1.44124e+08	3.29649e+08	5.27361e+08	4.30872e+10	4.53801e+10	4.85779e+10	0	0	0.0185265	0.018357	0.131678	0.18715	2.4705
bnb	crypto	2022	10	2022-10-31	282.735	327.151	268.49	327.151	282.196	276.291	58.6605	31	0	0.0188329	0.104857	0.359802	0.0511481	0.09407	0.601421	9.07574e+07	2.67296e+08	6.0625e+08	4.38383e+10	4.60761e+10	5.34162e+10	0	0	0.152334	0.14179	1.35222	2.77214	2.35096
bnb	crypto	2022	11	2022-11-30	324.795	301.111	253.966	353.709	297.567	296.872	99.7433	30	0	0.0577383	0.316246	1.10309	0.235963	0.281992	0.622982	1.93349e+08	7.24414e+08	3.47254e+09	4.14668e+10	4.85858e+10	5.77526e+10	0	0	-0.0795941	-0.0829406	-0.262266	-0.351498	2.55593
bnb	crypto	2022	12	2022-12-31	291.792	246.364	230.066	293.028	263.49	252.119	62.9615	31	0	0.0295932	0.164768	0.565378	0.143375	0.214865	0.658462	8.7116e+07	3.07098e+08	1.0187e+09	3.75645e+10	4.30219e+10	4.78447e+10	0	0	-0.181817	-0.200669	-1.21789	-1.39961	2.47468
bnb	crypto	2023	1	2023-01-31	244.015	312.117	244.015	317.399	287.897	299.053	73.3832	31	0	0.0219515	0.122221	0.419383	0.0637421	0.0582823	0.637754	9.29246e+07	2.70141e+08	5.97052e+08	3.975e+10	4.33739e+10	4.98988e+10	0	0	0.266892	0.236567	1.93557	3.71131	2.4109
bnb	crypto	2023	2	2023-02-28	317.473	301.469	293.571	333.284	313.395	312.403	39.7124	28	0	0.027477	0.145394	0.524947	0.110453	0.119155	0.564188	1.25389e+08	3.09245e+08	8.24156e+08	4.28304e+10	4.76066e+10	5.17952e+10	0	0	-0.0341158	-0.0347114	-0.238739	-0.314263	2.2772
bnb	crypto	2023	3	2023-03-31	302.466	317.059	276.842	339.239	309.273	310.452	62.3975	31	0	0.0273617	0.152344	0.522745	0.0948169	0.0848582	0.589024	1.03433e+08	3.02283e+08	8.00762e+08	4.3712e+10	4.88328e+10	5.35642e+10	0	0	0.0517147	0.0504219	0.330975	0.531781	2.94303
bnb	crypto	2023	4	2023-04-30	314.993	337.425	308.859	348.411	324.345	322.568	39.5522	30	0	0.0214584	0.117533	0.409963	0.0797523	0.0881754	0.541493	1.00554e+08	2.54014e+08	5.0671e+08	4.87674e+10	5.12107e+10	5.50093e+10	0	0	0.0642323	0.0622537	0.529671	0.780587	2.60214
bnb	crypto	2023	5	2023-05-31	328.73	306.74	304.699	328.73	313.539	311.801	24.0308	31	0	0.0128778	0.0717008	0.246031	0.0628357	0.0731021	0.547669	7.21615e+07	1.69292e+08	4.05986e+08	4.81078e+10	4.95036e+10	5.19019e+10	0	0	-0.090939	-0.095343	-1.32973	-1.51734	2.47665
bnb	crypto	2023	6	2023-06-30	304.985	240.49	230.733	307.327	253.037	242.896	76.5932	30	0	0.0332651	0.182201	0.63553	0.168893	0.249224	0.657472	8.88513e+07	2.9187e+08	6.44452e+08	3.5961e+10	3.95932e+10	4.85226e+10	0	0	-0.215981	-0.243322	-1.33546	-1.44069	2.28514
bnb	crypto	2023	7	2023-07-31	247.292	241.176	232.535	255.624	242.361	242.474	23.0889	31	0	0.0184925	0.102962	0.353299	0.066052	0.069965	0.654797	5.16943e+07	1.98803e+08	4.52329e+08	3.62418e+10	3.76953e+10	3.98404e+10	0	0	0.00285403	0.00284996	0.0276798	0.0431473	1.93474
bnb	crypto	2023	8	2023-08-31	247.055	216.43	210.699	247.055	229.638	231.755	36.3554	31	0	0.0179028	0.0996786	0.342033	0.0835944	0.147155	0.687213	6.46136e+07	1.52267e+08	3.33912e+08	3.24174e+10	3.53312e+10	3.80109e+10	0	0	-0.102606	-0.10826	-1.08609	-1.29506	1.68521
bnb	crypto	2023	9	2023-09-30	213.471	214.697	205.851	217.174	213.293	214.243	11.3238	30	0	0.0106905	0.0585543	0.204242	0.0437512	0.0502014	0.694411	3.75365e+07	9.80413e+07	1.77809e+08	3.16714e+10	3.28164e+10	3.34136e+10	0	0	-0.00800912	-0.00804137	-0.137332	-0.183798	1.43374
bnb	crypto	2023	10	2023-10-31	217.946	226.292	205.152	228.226	215.435	213.474	23.074	31	0	0.0143327	0.0798013	0.273827	0.0457641	0.058703	0.695448	4.77277e+07	1.40002e+08	3.34812e+08	3.15639e+10	3.3146e+10	3.5114e+10	0	0	0.0540076	0.0525996	0.659132	1.14937	1.51887
bnb	crypto	2023	11	2023-11-30	227.687	227.651	227.323	254.102	239.885	241.933	26.7784	30	0	0.0292584	0.160255	0.558982	0.129361	0.105385	0.662535	1.24801e+08	3.00416e+08	1.39889e+09	3.49751e+10	3.69077e+10	3.90951e+10	0	0	0.00600457	0.00598661	0.0373568	0.0462783	1.42402
bnb	crypto	2023	12	2023-12-31	228.45	311.991	228.023	324.178	259.602	252.274	96.1551	31	0	0.030083	0.167495	0.574736	0.0645159	0.0629463	0.661495	1.49933e+08	3.88256e+08	9.60004e+08	3.50828e+10	3.99414e+10	4.98768e+10	0	0	0.370483	0.315163	1.88163	4.88505	1.56755
bnb	crypto	2024	1	2024-01-31	314.357	300.294	291.846	323.096	307.582	307.041	31.25	31	0	0.0213833	0.119057	0.408527	0.0855329	0.0967206	0.566749	1.60924e+08	3.84331e+08	9.24327e+08	4.49023e+10	4.73234e+10	4.97103e+10	0	0	-0.0374934	-0.0382143	-0.320975	-0.446779	1.36081
bnb	crypto	2024	2	2024-02-29	299.739	400.128	299.739	415.586	346.021	350.614	115.847	29	0	0.0234109	0.126072	0.447265	0.0533104	0.0371951	0.555031	1.17424e+08	5.16985e+08	1.22243e+09	4.61167e+10	5.32374e+10	6.39405e+10	0	0	0.332457	0.287025	2.27668	5.38402	0.360102
bnb	crypto	2024	3	2024-03-31	407.837	606.494	395.325	625.328	532.396	554.857	230.003	31	0	0.050561	0.281512	0.965967	0.143767	0.190076	0.413132	4.03847e+08	1.5932e+09	3.42825e+09	6.08232e+10	8.19124e+10	9.62106e+10	0	0	0.515749	0.41591	1.47741	2.89295	0.397679
bnb	crypto	2024	4	2024-04-30	578.154	577.941	535.046	614.089	580.517	582.233	79.0428	30	0	0.0266485	0.14596	0.509119	0.109406	0.12174	0.205714	3.56674e+08	8.19434e+08	1.76503e+09	8.23201e+10	8.93161e+10	9.44813e+10	0	0	-0.0470783	-0.0482225	-0.330382	-0.440765	-0.0383009
bnb	crypto	2024	5	2024-05-31	560.661	593.261	560.661	618.777	589.502	591.952	58.116	31	0	0.0200653	0.111719	0.383346	0.0717519	0.0497836	0.167688	2.03946e+08	4.56988e+08	1.24654e+09	8.62612e+10	9.06985e+10	9.52027e+10	0	0	0.0265068	0.0261616	0.234174	0.364612	0.28676
bnb	crypto	2024	6	2024-06-30	600.721	582.156	566.491	710.121	612.382	601.277	143.63	30	0	0.0293534	0.160775	0.560795	0.112602	0.202261	0.202261	1.67499e+08	5.25268e+08	1.17248e+09	8.71581e+10	9.42187e+10	1.09256e+11	0	0	-0.0187189	-0.0188963	-0.117533	-0.167816	0.37039
bnb	crypto	2024	7	2024-07-31	576.67	576.689	491.808	601.547	559.025	573.275	109.74	31	0	0.0308774	0.171918	0.589913	0.124238	0.150713	0.307431	2.05294e+08	4.39395e+08	1.17439e+09	7.56676e+10	8.57107e+10	9.25517e+10	0	0	-0.00938948	-0.00943384	-0.054874	-0.0759338	0.300836
bnb	crypto	2024	8	2024-08-31	574.552	532.622	467.069	592.651	534.415	532.945	125.581	31	0	0.0334578	0.186285	0.639211	0.133008	0.187072	0.342268	1.79223e+08	5.21999e+08	2.48823e+09	6.81396e+10	7.79645e+10	8.64603e+10	0	0	-0.076414	-0.0794914	-0.426719	-0.597642	0.0709783
bnb	crypto	2024	9	2024-09-30	511.935	567.412	486.286	608.133	551.391	553.897	121.848	30	0	0.0240847	0.131918	0.460138	0.093445	0.0764786	0.315207	2.35527e+08	4.23295e+08	6.70422e+08	7.0943e+10	8.04411e+10	8.87191e+10	0	0	0.0653184	0.0632737	0.479646	0.677122	0.208496
bnb	crypto	2024	10	2024-10-31	547.956	576.398	542.925	605.431	580.463	582.787	62.506	31	0	0.0182102	0.10139	0.347905	0.0742152	0.056367	0.235447	1.15316e+08	3.2673e+08	6.67083e+08	7.9206e+10	8.46823e+10	8.83249e+10	0	0	0.0158366	0.0157125	0.154971	0.211715	0.0476835
bnb	crypto	2024	11	2024-11-30	572.634	655.007	552.014	661.192	616.824	620.679	109.178	30	0	0.0235679	0.129087	0.450264	0.0732071	0.0725797	0.222648	2.11515e+08	7.93207e+08	1.4986e+09	8.05319e+10	8.9987e+10	9.64597e+10	0	0	0.136379	0.127846	0.990393	1.74637	0.0238651
bnb	crypto	2024	12	2024-12-31	656.959	699.834	645.963	751.379	701.071	701.824	105.416	31	0	0.0372924	0.207635	0.71247	0.113418	0.136389	0.136389	3.26122e+08	8.64304e+08	2.80751e+09	9.42379e+10	1.02277e+11	1.09617e+11	0	0	0.0684389	0.0661986	0.318822	0.583667	0.188119
bnb	crypto	2025	1	2025-01-31	706.247	677.048	661.011	731.629	694.154	693.594	70.6184	31	0	0.0182936	0.101854	0.349498	0.0817009	0.0965221	0.12027	1.5063e+08	4.88832e+08	1.19964e+09	9.64333e+10	1.01268e+11	1.06736e+11	0	0	-0.0325591	-0.0331009	-0.324983	-0.405148	0.433826
bnb	crypto	2025	2	2025-02-28	653.476	586.696	568.871	698.552	631.018	633.996	129.681	28	0	0.0358178	0.18953	0.684297	0.144108	0.160126	0.242897	2.65809e+08	7.44592e+08	2.43177e+09	8.29913e+10	9.20577e+10	1.0191e+11	0	0	-0.133451	-0.143236	-0.755745	-0.993951	0.281464
bnb	crypto	2025	3	2025-03-31	606.935	604.946	533.383	637.486	603.353	604.946	104.103	31	0	0.0303236	0.168835	0.579331	0.125121	0.144338	0.290128	2.28998e+08	5.68412e+08	1.04062e+09	7.7814e+10	8.80217e+10	9.30013e+10	0	0	0.0311067	0.0306326	0.181436	0.244824	0.241881
bnb	crypto	2025	4	2025-04-30	610.873	599.904	552.255	617.093	590.797	592.429	64.8379	30	0	0.0207067	0.113416	0.395602	0.0864557	0.0959582	0.265012	1.45064e+08	4.24042e+08	1.28944e+09	8.05671e+10	8.619e+10	9.00261e+10	0	0	-0.00833507	-0.00837	-0.0737994	-0.0968125	0.383581
bnb	crypto	2025	5	2025-05-31	599.496	658.612	585.883	687.445	646.877	651.796	101.562	31	0	0.0203037	0.113046	0.387902	0.0675194	0.0463339	0.220256	1.83987e+08	5.09156e+08	1.03985e+09	8.54731e+10	9.43713e+10	1.0029e+11	0	0	0.0978619	0.0933646	0.825897	1.38278	0.743335
bnb	crypto	2025	6	2025-06-30	661.556	657.163	616.155	673.302	650.032	648.684	57.1464	30	0	0.0148478	0.081325	0.283668	0.0603003	0.0848748	0.179967	1.43911e+08	4.18405e+08	7.20742e+08	8.98894e+10	9.48316e+10	9.82263e+10	0	0	-0.00219873	-0.00220115	-0.0270661	-0.0365032	1.23866
bnb	crypto	2025	7	2025-07-31	645.961	785.349	645.961	843.199	724.076	708.478	197.238	31	0	0.0178137	0.0991823	0.34033	0.0461028	0.0686074	0.1403	1.60276e+08	7.94216e+08	1.9067e+09	9.42376e+10	1.04106e+11	1.17448e+11	0	0	0.195059	0.178196	1.79665	3.86518	1.11201
bnb	crypto	2025	8	2025-08-31	755.639	858.506	735.549	898.776	827.037	839.233	163.227	31	0	0.026062	0.145107	0.497914	0.0879171	0.0656197	0.127669	3.89373e+08	9.19951e+08	2.13779e+09	1.02453e+11	1.15188e+11	1.25188e+11	0	0	0.0931516	0.0890649	0.613788	1.01305	1.25083
bnb	crypto	2025	9	2025-09-30	845.497	1007.43	845.497	1048.52	939.39	939.496	203.028	30	0	0.0259559	0.142166	0.495886	0.0973083	0.0983971	0.0983971	4.47612e+08	9.47262e+08	1.8663e+09	1.17683e+11	1.30751e+11	1.45941e+11	0	0	0.173471	0.159966	1.12521	1.64391	1.44418
bnb	crypto	2025	10	2025-10-31	1025.47	1089.05	1025.47	1310.23	1148.26	1125.15	284.761	31	0	0.0481223	0.267933	0.919375	0.173424	0.190909	0.190909	5.12105e+08	2.07749e+09	4.59776e+09	1.42731e+11	1.59614e+11	1.82364e+11	0	0	0.0810186	0.0779037	0.290758	0.449209	1.35582
bnb	crypto	2025	11	2025-11-30	1094.48	880.406	828.454	1094.48	928.861	927.226	266.023	30	0	0.0283389	0.155218	0.541414	0.138498	0.243059	0.367705	3.62296e+08	9.3676e+08	2.31716e+09	1.14109e+11	1.27939e+11	1.50751e+11	0	0	-0.191586	-0.212681	-1.3702	-1.53562	1.18207
bnb	crypto	2025	12	2025-12-31	828.793	863.406	828.793	920.24	867.353	860.798	91.4471	31	0	0.0229702	0.127893	0.438845	0.0892387	0.0990116	0.367446	2.47313e+08	6.45943e+08	1.98531e+09	1.14155e+11	1.19465e+11	1.2675e+11	0	0	-0.0193082	-0.019497	-0.152448	-0.218482	1.42681
bnb	crypto	2026	1	2026-01-31	862.93	780.078	780.078	948.601	896.553	895.916	168.523	31	0	0.0243747	0.135713	0.465679	0.118828	0.177654	0.404627	2.09931e+08	7.17752e+08	1.83174e+09	1.06371e+11	1.22856e+11	1.30654e+11	0	0	-0.0965117	-0.101492	-0.747844	-0.854109	0.981756
bnb	crypto	2026	2	2026-02-28	757.971	616.855	584.436	774.576	638.297	622.369	190.139	28	0	0.0391723	0.20728	0.748386	0.173463	0.245476	0.553945	1.57782e+08	5.32464e+08	1.47174e+09	7.96931e+10	8.70378e+10	1.05621e+11	0	0	-0.209239	-0.234759	-1.13257	-1.35336	0.621658
bnb	crypto	2026	3	2026-03-31	618.996	616.543	605.466	679.157	638.059	637.986	73.6908	31	0	0.0183667	0.102262	0.350895	0.0695612	0.108503	0.537894	1.30133e+08	3.0658e+08	5.61713e+08	8.25597e+10	8.70044e+10	9.26085e+10	0	0	-0.00050604	-0.000506168	-0.00494974	-0.00727658	0.571993
bnb	crypto	2026	4	2026-04-30	610.732	614.976	583.182	643.204	616.923	617.066	60.0222	30	0	0.0186401	0.102096	0.356118	0.0736734	0.0475384	0.554902	1.00014e+08	2.06287e+08	4.46255e+08	7.95209e+10	8.36271e+10	8.66954e+10	0	0	-0.00254143	-0.00254466	-0.0249242	-0.0345397	0.508834
bsv	crypto	2018	11	2018-11-30	92.6704	93.8906	41.5418	116.098	81.4265	91.7353	74.5564	16	0	0.230239	0.891713	4.39871	0.612008	0.628691	0.628691	2.33742e+07	1.10148e+08	3.7264e+08	7.25686e+08	1.42277e+09	2.02919e+09	1	0
bsv	crypto	2018	12	2018-12-31	92.4751	83.706	66.8618	110.342	91.0669	92.041	43.4798	31	0	0.0830186	0.462228	1.58607	0.269067	0.355129	0.424093	1.22534e+07	6.35208e+07	2.44349e+08	1.17088e+09	1.59493e+09	1.93328e+09	0	0	-0.108473	-0.114819	-0.248404	-0.426731
bsv	crypto	2019	1	2019-01-31	90.9888	63.1155	62.7666	94.1704	77.8158	76.181	31.4038	31	0	0.0481755	0.26823	0.920392	0.218427	0.333478	0.459367	6.87634e+06	1.83008e+07	5.35785e+07	1.10422e+09	1.36705e+09	1.65214e+09	0	0	-0.245986	-0.282345	-1.05262	-1.29263
bsv	crypto	2019	2	2019-02-28	63.5856	66.2774	60.1857	73.0889	64.412	64.4337	12.9033	28	0	0.044889	0.23753	0.857603	0.154399	0.101973	0.481597	7.77834e+06	1.80076e+07	5.59985e+07	1.05958e+09	1.13509e+09	1.28948e+09	0	0	0.0500971	0.0488826	0.205795	0.316599
bsv	crypto	2019	3	2019-03-31	66.2033	64.7145	62.464	68.0771	65.3242	65.3394	5.61304	31	0	0.0198132	0.110315	0.37853	0.0708298	0.0743337	0.461973	1.13241e+07	2.22634e+07	7.04399e+07	1.1027e+09	1.15459e+09	1.20324e+09	0	0	-0.0235816	-0.0238641	-0.216327	-0.336922
bsv	crypto	2019	4	2019-04-30	65.7883	53.1865	50.7205	86.3529	65.8497	59.2771	35.6324	30	0	0.0594268	0.325494	1.13535	0.248557	0.412637	0.563124	1.75099e+07	5.17333e+07	2.07353e+08	9.00092e+08	1.16731e+09	1.52966e+09	0	0	-0.178135	-0.19618	-0.602714	-0.789274
bsv	crypto	2019	5	2019-05-31	52.8316	195.273	52.0513	195.273	83.6283	62.5303	143.222	31	0	0.134595	0.749393	2.57143	0.193829	0.179638	0.551661	1.6188e+07	9.94823e+07	7.92029e+08	9.24364e+08	1.48777e+09	3.47795e+09	2	0	2.67148	1.30059	1.73553	6.71
bsv	crypto	2019	6	2019-06-30	189.129	194.962	183.251	238.596	211.027	213.509	55.345	30	0	0.058926	0.322751	1.12578	0.218096	0.18889	0.18889	3.2476e+07	1.09056e+08	4.25433e+08	3.26688e+09	3.76456e+09	4.25904e+09	0	0	-0.00159112	-0.00159239	-0.0049338	-0.00730133
bsv	crypto	2019	7	2019-07-31	196.42	147.894	112.043	204.619	166.29	166.232	92.5757	31	0	0.071182	0.396325	1.35993	0.314521	0.45243	0.530407	2.4092e+07	5.4198e+07	1.40811e+08	2.00479e+09	2.97522e+09	3.65872e+09	0	0	-0.241422	-0.276309	-0.697179	-0.878507
bsv	crypto	2019	8	2019-08-31	145.715	128.971	125.207	152.903	138.999	136.539	27.6963	31	0	0.0293961	0.163671	0.561612	0.134683	0.181137	0.475236	1.33402e+07	2.94199e+07	6.50291e+07	2.24994e+09	2.49471e+09	2.74139e+09	0	0	-0.127954	-0.136913	-0.836518	-1.01656
bsv	crypto	2019	9	2019-09-30	129.71	87.4082	82.685	135.375	116.182	122.138	52.6895	30	0	0.0556991	0.305077	1.06413	0.297338	0.389213	0.653452	1.13059e+07	2.6101e+07	7.41289e+07	1.49059e+09	2.09139e+09	2.43533e+09	0	0	-0.322263	-0.388996	-1.27507	-1.30826
bsv	crypto	2019	10	2019-10-31	84.9103	128.692	80.6638	140.332	100.344	89.3191	59.6687	31	0	0.0619267	0.344794	1.18311	0.147354	0.134805	0.661923	1.09761e+07	4.46873e+07	1.71744e+08	1.45517e+09	1.81229e+09	2.53742e+09	0	0	0.472312	0.386834	1.12193	2.6252
bsv	crypto	2019	11	2019-11-30	129.112	107.376	97.407	139.384	119.618	123.539	41.9772	30	0	0.0413553	0.226512	0.790092	0.168033	0.301162	0.591749	2.10175e+07	4.97377e+07	9.19943e+07	1.76547e+09	2.16646e+09	2.52229e+09	0	0	-0.165639	-0.181089	-0.799465	-1.0777
bsv	crypto	2019	12	2019-12-31	104.457	96.9749	80.4381	104.457	92.3437	93.1697	24.0192	31	0	0.0365057	0.203255	0.69744	0.152274	0.229943	0.662869	1.47235e+07	3.03509e+07	5.57624e+07	1.46151e+09	1.67763e+09	1.89494e+09	0	0	-0.0968634	-0.101881	-0.501249	-0.669066
bsv	crypto	2020	1	2020-01-31	96.8166	273.737	92.9354	422.718	223.68	261.461	329.783	31	0	0.194191	1.08121	3.71001	0.414714	0.405512	0.61049	2.80043e+07	3.49426e+08	1.18278e+09	1.69127e+09	4.07749e+09	7.70231e+09	1	0	1.82276	1.03772	0.959774	2.50224
bsv	crypto	2020	2	2020-02-29	279.814	211.933	211.933	368.928	295.703	291.738	156.995	29	0	0.0617446	0.332505	1.17963	0.261654	0.425543	0.498642	1.82797e+08	3.85463e+08	7.1315e+08	3.879e+09	5.40452e+09	6.74069e+09	0	0	-0.225778	-0.255897	-0.769604	-0.977996
bsv	crypto	2020	3	2020-03-31	229.022	165.909	107.81	251.602	175.277	168.439	143.792	31	0	0.134233	0.74738	2.56453	0.633263	0.571508	0.744961	1.00746e+08	2.73485e+08	6.1798e+08	1.97554e+09	3.21272e+09	4.60601e+09	0	0	-0.217166	-0.244835	-0.327591	-0.386625
bsv	crypto	2020	4	2020-04-30	168.406	208.342	168.406	218.566	191.553	193.085	50.1597	30	0	0.0544628	0.298305	1.04051	0.182785	0.164332	0.601611	8.21796e+07	1.87028e+08	5.66564e+08	3.09199e+09	3.52066e+09	4.01571e+09	0	0	0.255764	0.227744	0.763461	1.24597
bsv	crypto	2020	5	2020-05-31	211.672	191.82	180.736	212.978	196.32	193.673	32.2415	31	0	0.0369616	0.205794	0.706151	0.168336	0.151384	0.572443	5.71413e+07	1.20117e+08	2.32698e+08	3.32856e+09	3.61373e+09	3.91769e+09	0	0	-0.0793048	-0.0826263	-0.401501	-0.490842
bsv	crypto	2020	6	2020-06-30	200.839	157.966	155.105	200.839	179.375	177.58	45.7343	30	0	0.0268042	0.146813	0.512094	0.126917	0.227716	0.633078	3.37621e+07	7.49447e+07	1.91484e+08	2.86094e+09	3.30667e+09	3.69983e+09	0	0	-0.176488	-0.194177	-1.32262	-1.52995
bsv	crypto	2020	7	2020-07-31	158.582	230.19	154.071	230.19	183.287	181.821	76.1193	31	0	0.051736	0.288054	0.988415	0.0847872	0.131952	0.635524	4.51015e+07	1.26067e+08	3.8626e+08	2.84299e+09	3.38401e+09	4.25294e+09	0	0	0.457214	0.376527	1.30714	4.44084
bsv	crypto	2020	8	2020-08-31	246.726	192.617	185.373	246.726	211.922	212.083	61.3535	31	0	0.0417648	0.232537	0.797916	0.189922	0.24867	0.561474	5.14944e+07	1.57563e+08	4.97455e+08	3.42936e+09	3.91835e+09	4.55869e+09	0	0	-0.163225	-0.1782	-0.766329	-0.93828
bsv	crypto	2020	9	2020-09-30	204.618	172.008	146.133	204.618	164.9	164.041	58.4841	30	0	0.0500708	0.274249	0.956602	0.231368	0.285821	0.654301	3.92501e+07	9.88413e+07	2.20793e+08	2.70674e+09	3.0535e+09	3.78635e+09	0	0	-0.106994	-0.113162	-0.412626	-0.489101
bsv	crypto	2020	10	2020-10-31	168.968	165.589	157.272	181.958	166.364	166.195	24.6856	31	0	0.0257672	0.143466	0.492281	0.103973	0.0982616	0.627951	2.79102e+07	7.39514e+07	1.26675e+08	2.91714e+09	3.0852e+09	3.37584e+09	0	0	-0.0373177	-0.0380319	-0.265094	-0.365785
bsv	crypto	2020	11	2020-11-30	164.827	183.915	151.533	209.938	167.706	162.091	58.4048	30	0	0.0600051	0.328661	1.1464	0.216246	0.229175	0.641527	4.12402e+07	1.46939e+08	5.06473e+08	2.8127e+09	3.11469e+09	3.90056e+09	0	0	0.11067	0.104964	0.319367	0.48539
bsv	crypto	2020	12	2020-12-31	169.248	164.062	155.071	182.938	170.471	169.248	27.8671	31	0	0.034582	0.192544	0.660688	0.159064	0.15233	0.633157	6.44157e+07	1.53611e+08	4.6557e+08	2.88516e+09	3.1706e+09	3.40316e+09	0	0	-0.107948	-0.114231	-0.593272	-0.718144
bsv	crypto	2021	1	2021-01-31	163.022	174.663	161.535	287.723	189.366	179.188	126.188	31	0	0.111497	0.620788	2.13014	0.347057	0.438575	0.617866	8.9335e+07	4.15545e+08	1.80664e+09	3.01049e+09	3.52727e+09	5.35761e+09	1	0	0.064619	0.062617	0.100867	0.180423
bsv	crypto	2021	2	2021-02-28	178.895	177.875	177.875	264.182	210.565	203.552	86.3065	28	0	0.0638986	0.338119	1.22078	0.237013	0.326693	0.579211	1.55441e+08	4.21938e+08	8.85242e+08	3.31715e+09	3.92774e+09	4.92778e+09	0	0	0.0183893	0.0182223	0.053893	0.0768831
bsv	crypto	2021	3	2021-03-31	185.073	217.13	180.788	218.314	196.507	193.969	37.5267	31	0	0.0459605	0.255897	0.878075	0.147906	0.11883	0.572321	1.04148e+08	2.37327e+08	6.36839e+08	3.37525e+09	3.67073e+09	4.07741e+09	0	0	0.220684	0.199411	0.779263	1.34823
bsv	crypto	2021	4	2021-04-30	228.826	325.032	219.407	439.697	282.428	272.735	220.29	30	0	0.0896327	0.490939	1.71243	0.315656	0.466743	0.480963	2.82437e+08	6.5409e+08	1.70654e+09	4.10197e+09	5.28352e+09	8.22572e+09	0	0	0.496949	0.403429	0.82175	1.27806
bsv	crypto	2021	5	2021-05-31	331.783	174.69	149.229	422.928	273.258	310.244	273.699	31	0	0.125827	0.700574	2.40392	0.589956	0.647154	0.66061	1.76017e+08	6.31152e+08	1.40664e+09	2.79664e+09	5.1187e+09	7.91958e+09	0	0	-0.462544	-0.620909	-0.886285	-1.05247
bsv	crypto	2021	6	2021-06-30	175.674	146.844	118.507	188.867	156.939	162.825	70.36	30	0	0.06207	0.339971	1.18585	0.259887	0.372538	0.730481	8.27203e+07	1.67289e+08	3.36479e+08	2.22406e+09	2.94432e+09	3.54135e+09	0	0	-0.159404	-0.173644	-0.51076	-0.668151
bsv	crypto	2021	7	2021-07-31	145.987	141.903	113.996	149.939	133.942	137.07	35.9433	31	0	0.0247169	0.137618	0.472216	0.0994794	0.23972	0.740741	4.64739e+07	8.16081e+07	1.5946e+08	2.14224e+09	2.51658e+09	2.81558e+09	0	0	-0.0336471	-0.0342262	-0.248704	-0.344053
bsv	crypto	2021	8	2021-08-31	142.312	163.272	139.21	170.796	157.32	158.915	31.5856	31	0	0.0365935	0.203744	0.699117	0.127418	0.0869192	0.683395	7.44246e+07	1.54833e+08	8.90399e+08	2.61774e+09	2.96027e+09	3.21437e+09	0	0	0.150587	0.140272	0.688472	1.10088
bsv	crypto	2021	9	2021-09-30	167.925	129.181	124.672	191.83	152.392	154.773	67.1574	30	0	0.0548704	0.300538	1.0483	0.272974	0.350088	0.716458	6.87448e+07	1.58422e+08	3.6392e+08	2.3507e+09	2.87152e+09	3.61302e+09	0	0	-0.208798	-0.234203	-0.779278	-0.857966
bsv	crypto	2021	10	2021-10-31	139.572	165.419	139.572	180.674	165.649	170.447	41.1026	31	0	0.0450158	0.250637	0.860026	0.136522	0.147385	0.682573	5.30037e+07	1.17983e+08	4.4219e+08	2.63199e+09	3.12602e+09	3.40792e+09	0	0	0.280521	0.247267	0.986554	1.81118
bsv	crypto	2021	11	2021-11-30	164.755	150.274	144.993	191.676	164.221	163.906	46.6829	30	0	0.0385762	0.211291	0.736998	0.171875	0.243552	0.670244	3.95514e+07	7.7175e+07	2.27599e+08	2.74147e+09	3.10344e+09	3.62121e+09	0	0	-0.0915561	-0.0960221	-0.454455	-0.558673	0.281689
bsv	crypto	2021	12	2021-12-31	147.609	121.361	121.132	162.74	131.086	127.434	41.6076	31	0	0.0578181	0.321918	1.10461	0.204903	0.254263	0.724509	2.80181e+07	2.39152e+08	7.09778e+08	2.2913e+09	2.48084e+09	3.07865e+09	0	0	-0.1924	-0.213688	-0.663798	-1.04288	0.210355
bsv	crypto	2022	1	2022-01-31	122.415	91.4197	88.7892	124.111	105.111	109.331	35.3215	31	0	0.0302651	0.168509	0.578214	0.154294	0.284597	0.798067	1.39836e+07	3.91614e+07	1.34418e+08	1.68373e+09	1.99214e+09	2.35076e+09	0	0	-0.246714	-0.28331	-1.68128	-1.83617	0.182888
bsv	crypto	2022	2	2022-02-28	91.7365	88.2403	81.2954	102.462	91.1126	90.9911	21.1661	28	0	0.0331617	0.175475	0.633553	0.121302	0.206576	0.81511	1.33024e+07	2.6745e+07	4.82122e+07	1.54344e+09	1.72926e+09	1.94401e+09	0	0	-0.0347781	-0.0353973	-0.201722	-0.291812	0.137408
bsv	crypto	2022	3	2022-03-31	87.5532	94.5308	75.334	98.547	84.5063	83.1961	23.213	31	0	0.0309625	0.172392	0.591538	0.11006	0.139563	0.828668	1.59292e+07	4.8361e+07	1.02701e+08	1.43161e+09	1.60618e+09	1.87425e+09	0	0	0.0712887	0.0688623	0.399452	0.625679	0.184811
bsv	crypto	2022	4	2022-04-30	95.8547	71.0157	71.0157	100.439	85.1777	85.0101	29.423	30	0	0.0323473	0.177173	0.617993	0.162468	0.292945	0.838489	1.71079e+07	4.17395e+07	1.25602e+08	1.35262e+09	1.62119e+09	1.91058e+09	0	0	-0.248755	-0.286024	-1.61438	-1.7605	0.129443
bsv	crypto	2022	5	2022-05-31	73.8843	54.3408	47.8583	78.6507	58.039	53.5561	30.7924	31	0	0.0598913	0.333461	1.14422	0.288425	0.391508	0.891156	1.32837e+07	5.45754e+07	3.09438e+08	9.12696e+08	1.10622e+09	1.49831e+09	0	0	-0.234806	-0.267626	-0.802572	-0.927889	-0.416814
bsv	crypto	2022	6	2022-06-30	52.0124	54.4859	46.1788	64.4489	57.0743	56.826	18.2701	30	0	0.0517818	0.283621	0.98929	0.185557	0.199046	0.894976	1.09979e+07	3.88151e+07	2.1889e+08	8.81378e+08	1.08948e+09	1.23073e+09	0	0	0.00266993	0.00266637	0.00940118	0.0143695	-0.4157
bsv	crypto	2022	7	2022-07-31	52.1412	61.2014	49.6233	66.3611	55.9248	55.605	16.7377	31	0	0.039151	0.217983	0.747978	0.145232	0.1299	0.887142	9.3691e+06	2.44131e+07	9.26015e+07	9.48417e+08	1.06907e+09	1.26933e+09	0	0	0.123253	0.116229	0.533201	0.8003	-0.305956
bsv	crypto	2022	8	2022-08-31	60.6499	51.8694	51.5658	63.6052	58.0788	59.7853	12.0394	31	0	0.0311079	0.173201	0.594315	0.151733	0.189284	0.882724	8.02643e+06	1.43917e+07	4.34641e+07	9.87299e+08	1.11182e+09	1.21741e+09	0	0	-0.152481	-0.165442	-0.955201	-1.09035	-0.31158
bsv	crypto	2022	9	2022-09-30	52.4538	49.0001	47.6933	55.4545	51.3747	51.6687	7.76121	30	0	0.0324518	0.177746	0.619991	0.137067	0.139956	0.891531	5.72585e+06	1.55108e+07	5.72374e+07	9.14567e+08	9.849e+08	1.06281e+09	0	0	-0.0553164	-0.0569052	-0.320149	-0.415164	-0.206599
bsv	crypto	2022	10	2022-10-31	48.3274	47.8925	46.4717	50.0585	48.2097	48.1211	3.58683	31	0	0.0180508	0.100503	0.34486	0.0724308	0.0716527	0.89431	5.60633e+06	1.33443e+07	5.08633e+07	8.924e+08	9.25554e+08	9.60923e+08	0	0	-0.022605	-0.0228644	-0.2275	-0.315672	-0.329217
bsv	crypto	2022	11	2022-11-30	47.1932	42.576	35.365	48.8107	41.3906	39.9551	13.4457	30	0	0.0484984	0.265637	0.92656	0.223352	0.275467	0.91957	4.47704e+06	2.59196e+07	1.25353e+08	6.79721e+08	7.9576e+08	9.37931e+08	0	0	-0.111009	-0.117668	-0.442965	-0.526827	-0.305336
bsv	crypto	2022	12	2022-12-31	42.0553	41.1827	40.4647	47.2643	43.6074	43.5446	6.79957	31	0	0.0272196	0.151552	0.52003	0.103426	0.143863	0.907971	3.93863e+06	2.13063e+07	8.53843e+07	7.79518e+08	8.39593e+08	9.09954e+08	0	0	-0.0327249	-0.0332723	-0.219543	-0.321701	-0.284377
bsv	crypto	2023	1	2023-01-31	41.2501	42.6534	40.4276	45.5951	43.2824	43.2236	5.16747	31	0	0.0321623	0.179072	0.614461	0.138087	0.096888	0.908056	4.91707e+06	2.54763e+07	9.62294e+07	7.79311e+08	8.34539e+08	8.79045e+08	0	0	0.0357102	0.0350874	0.19594	0.254095	-0.528901
bsv	crypto	2023	2	2023-02-28	43.3948	40.9678	40.4338	44.2859	42.2971	42.4692	3.85212	28	0	0.0232145	0.122839	0.443512	0.0910434	0.086983	0.908042	5.91641e+06	1.83755e+07	8.09392e+07	7.80627e+08	8.16657e+08	8.54681e+08	0	0	-0.0395175	-0.0403195	-0.328229	-0.44286	-0.482627
bsv	crypto	2023	3	2023-03-31	41.6813	35.7159	33.0323	41.7953	36.5911	36.222	8.76304	31	0	0.0328136	0.182698	0.626903	0.143684	0.209665	0.924875	6.24567e+06	1.41666e+07	5.05591e+07	6.38504e+08	7.07449e+08	8.07551e+08	0	0	-0.128197	-0.137192	-0.750919	-0.954816	-0.450135
bsv	crypto	2023	4	2023-04-30	36.1399	33.6247	33.5395	37.1101	35.4033	35.7332	3.57057	30	0	0.0220359	0.120696	0.420995	0.104504	0.0962154	0.923721	2.34818e+06	7.53853e+06	2.07856e+07	6.49689e+08	6.85454e+08	7.18488e+08	0	0	-0.0585504	-0.0603345	-0.49989	-0.577341	-0.508111
bsv	crypto	2023	5	2023-05-31	33.1195	32.8717	29.9543	42.1418	34.1001	33.4827	12.1875	31	0	0.0740862	0.412494	1.41541	0.194643	0.235725	0.931875	3.3305e+06	3.53479e+07	2.79054e+08	5.80564e+08	6.61159e+08	8.16818e+08	0	0	-0.0223956	-0.0226501	-0.0549102	-0.116368	-0.49457
bsv	crypto	2023	6	2023-06-30	32.3348	43.2502	24.0552	43.2502	30.6401	30.1894	19.195	30	0	0.0709205	0.388448	1.35493	0.20908	0.271839	0.945291	3.75991e+06	4.31469e+07	2.85339e+08	4.67026e+08	5.94927e+08	8.40316e+08	0	0	0.31573	0.274391	0.70638	1.31238	-0.390109
bsv	crypto	2023	7	2023-07-31	49.0217	40.0854	35.0108	49.483	39.5248	38.5919	14.4722	31	0	0.0406096	0.226105	0.775845	0.140052	0.292469	0.920375	9.90471e+06	4.47256e+07	3.66608e+08	6.81074e+08	7.68474e+08	9.61504e+08	0	0	-0.073174	-0.0759894	-0.336081	-0.54258	-0.491255
bsv	crypto	2023	8	2023-08-31	38.1938	31.2484	28.3541	38.1938	33.3678	33.6852	9.83973	31	0	0.0377223	0.210029	0.720684	0.174581	0.257626	0.935514	3.99144e+06	2.03668e+07	4.63307e+07	5.46272e+08	6.4446e+08	7.43167e+08	0	0	-0.220456	-0.249046	-1.18577	-1.42653	-0.50296
bsv	crypto	2023	9	2023-09-30	30.8928	31.5513	29.1525	31.98	30.9714	30.9209	2.82752	30	0	0.0178348	0.0976853	0.340734	0.0590584	0.0563586	0.933699	2.67966e+06	6.39098e+06	1.47479e+07	5.61655e+08	5.96698e+08	6.1613e+08	0	0	0.00969346	0.00964678	0.0987536	0.163343	-0.477746
bsv	crypto	2023	10	2023-10-31	32.4686	49.1565	32.4686	54.8171	41.7754	39.1828	22.3484	31	0	0.0737471	0.410607	1.40894	0.164689	0.168148	0.926157	5.5175e+06	8.46653e+07	3.73241e+08	6.25543e+08	8.08743e+08	1.07059e+09	0	0	0.557987	0.443395	1.07985	2.69232	-0.368323
bsv	crypto	2023	11	2023-11-30	49.538	46.2749	44.6379	51.0493	48.2247	48.4122	6.4114	30	0	0.0245126	0.134261	0.468313	0.101255	0.125592	0.89848	1.66764e+07	3.95645e+07	1.68952e+08	8.73004e+08	9.42907e+08	9.97894e+08	0	0	-0.0586195	-0.0604078	-0.449928	-0.596591	-0.407906
bsv	crypto	2023	12	2023-12-31	47.3687	94.8933	47.3687	95.1197	56.5244	50.0289	47.751	31	0	0.0838977	0.467123	1.60286	0.100724	0.109549	0.89227	2.453e+07	1.08384e+08	8.07546e+08	9.26843e+08	1.10682e+09	1.86356e+09	0	0	1.05064	0.718153	1.5374	7.12987	-0.184556
bsv	crypto	2024	1	2024-01-31	103.626	68.9986	67.7938	103.626	80.4262	80.2179	35.8326	31	0	0.0579651	0.322736	1.10742	0.236072	0.345786	0.845817	4.01873e+07	1.26182e+08	3.83187e+08	1.32984e+09	1.57693e+09	2.0305e+09	0	0	-0.272883	-0.318668	-0.987395	-1.34987	-0.294574
bsv	crypto	2024	2	2024-02-29	69.9874	81.0046	69.9874	82.8102	76.8793	77.0563	12.8228	29	0	0.0240213	0.129359	0.458927	0.0744011	0.103602	0.840828	3.01794e+07	5.99493e+07	1.33884e+08	1.37331e+09	1.50952e+09	1.62692e+09	0	0	0.174004	0.16042	1.24012	2.15615	-0.255169
bsv	crypto	2024	3	2024-03-31	84.8496	102.902	71.0942	115.675	96.6265	96.7493	44.5813	31	0	0.0827657	0.46082	1.58124	0.284972	0.3854	0.838311	3.95887e+07	1.02223e+08	3.53008e+08	1.39802e+09	1.89979e+09	2.27387e+09	0	0	0.270329	0.239276	0.51924	0.839648	-0.243783
bsv	crypto	2024	4	2024-04-30	95.7847	60.4817	60.4817	101.521	78.0472	71.014	41.0392	30	0	0.0577082	0.316081	1.10251	0.289757	0.404244	0.862447	1.38586e+07	4.43592e+07	1.08452e+08	1.19117e+09	1.53645e+09	1.99799e+09	0	0	-0.412243	-0.531441	-1.68135	-1.8341	-0.474733
bsv	crypto	2024	5	2024-05-31	58.8506	61.4326	58.662	69.6456	63.3433	63.3608	10.9836	31	0	0.0333796	0.18585	0.637716	0.110048	0.117926	0.866585	5.71025e+06	1.72596e+07	4.11911e+07	1.1557e+09	1.24799e+09	1.37228e+09	0	0	0.0157228	0.0156005	0.0839416	0.141761	-0.358234
bsv	crypto	2024	6	2024-06-30	61.4647	44.9925	43.3166	63.8794	50.9674	49.4044	20.5628	30	0	0.0350998	0.192249	0.67058	0.175905	0.3219	0.901485	5.72883e+06	1.24506e+07	2.62443e+07	8.54059e+08	1.00483e+09	1.25912e+09	0	0	-0.267611	-0.311444	-1.62	-1.77053	-0.401731
bsv	crypto	2024	7	2024-07-31	44.2626	49.7922	34.7865	53.3899	43.1922	44.4229	18.6035	31	0	0.0508953	0.283373	0.972354	0.192514	0.218683	0.920885	6.51341e+06	2.09608e+07	1.73743e+08	6.86172e+08	8.52165e+08	1.05366e+09	0	0	0.106677	0.101362	0.357698	0.526519	-0.363304
bsv	crypto	2024	8	2024-08-31	48.5661	42.1194	36.156	48.5661	42.7252	42.6238	12.4101	31	0	0.0514466	0.286443	0.982887	0.209648	0.25553	0.917771	5.93846e+06	1.67611e+07	4.03809e+07	7.13656e+08	8.43536e+08	9.5852e+08	0	0	-0.154096	-0.16735	-0.584235	-0.798243	-0.448053
bsv	crypto	2024	9	2024-09-30	40.0273	48.463	40.0273	53.1446	47.6849	48.5292	13.1173	30	0	0.0336152	0.184118	0.642217	0.105697	0.0880918	0.908966	8.04715e+06	1.54093e+07	3.41284e+07	7.90552e+08	9.42114e+08	1.05024e+09	0	0	0.150609	0.140291	0.761965	1.3273	-0.343702
bsv	crypto	2024	10	2024-10-31	45.1112	51.8446	43.9696	52.0817	47.6343	46.5868	8.11207	31	0	0.0372363	0.207323	0.711399	0.130519	0.120408	0.9	4.09448e+06	1.56994e+07	5.54229e+07	8.69166e+08	9.41761e+08	1.02999e+09	0	0	0.0697775	0.0674506	0.325341	0.516789	-0.395434
bsv	crypto	2024	11	2024-11-30	49.8488	71.3561	45.1991	71.3561	62.0226	65.7508	26.157	30	0	0.0454512	0.248947	0.868345	0.138555	0.0932769	0.897204	1.13326e+07	5.6813e+07	1.70435e+08	8.93992e+08	1.22709e+09	1.41218e+09	0	0	0.376345	0.319432	1.28313	2.30546	-0.277558
bsv	crypto	2024	12	2024-12-31	72.0183	50.3017	50.3017	83.6824	63.6959	64.1639	33.3806	31	0	0.0504596	0.280947	0.96403	0.249374	0.398897	0.885599	1.06268e+07	4.14539e+07	1.07107e+08	9.96204e+08	1.261e+09	1.65628e+09	0	0	-0.29506	-0.349643	-1.24451	-1.40208	-0.342629
bsv	crypto	2025	1	2025-01-31	51.672	49.0941	47.3791	63.9502	53.7115	52.9208	16.5711	31	0	0.0575487	0.320418	1.09947	0.199378	0.259124	0.892246	1.13095e+07	4.16871e+07	3.46495e+08	9.38918e+08	1.06411e+09	1.26679e+09	0	0	-0.0240082	-0.0243011	-0.0758419	-0.121884	-0.279602
bsv	crypto	2025	2	2025-02-28	46.4927	35.8284	33.8393	46.4927	38.7787	39.2778	12.6534	28	0	0.0432334	0.22877	0.825974	0.212468	0.272158	0.923039	1.13152e+07	1.85489e+07	5.31763e+07	6.71003e+08	7.68777e+08	9.21433e+08	0	0	-0.27021	-0.314999	-1.37692	-1.48257	-0.387652
bsv	crypto	2025	3	2025-03-31	34.7733	31.4547	30.678	37.5616	34.0784	34.0184	6.88358	31	0	0.0432328	0.24071	0.825962	0.178506	0.183261	0.930229	8.42544e+06	2.15476e+07	4.07192e+07	6.08512e+08	6.76051e+08	7.44967e+08	0	0	-0.122072	-0.130191	-0.540862	-0.729335	-0.442223
bsv	crypto	2025	4	2025-04-30	32.3238	38.1	25.6623	44.2598	31.3048	29.3757	18.5975	30	0	0.0804378	0.440576	1.53676	0.199877	0.206088	0.941636	9.04625e+06	3.89545e+07	3.00594e+08	5.09355e+08	6.21468e+08	8.78825e+08	0	0	0.211265	0.191666	0.435034	0.958916	-0.269956
bsv	crypto	2025	5	2025-05-31	37.435	33.4326	32.9286	43.682	37.5091	36.9225	10.7534	31	0	0.0393096	0.218866	0.751008	0.162382	0.246175	0.925111	1.57913e+07	2.86221e+07	8.21676e+07	6.54349e+08	7.45129e+08	8.67645e+08	0	0	-0.122503	-0.130681	-0.597083	-0.804776	-0.215297
bsv	crypto	2025	6	2025-06-30	33.5847	26.4255	26.4255	34.7103	31.7128	31.4827	8.28482	30	0	0.0442365	0.242294	0.845138	0.219933	0.238685	0.939901	5.6106e+06	1.71497e+07	4.01134e+07	5.25488e+08	6.30418e+08	6.89926e+08	0	0	-0.20959	-0.235204	-0.97074	-1.06944	-0.288374
bsv	crypto	2025	7	2025-07-31	24.9592	26.7538	23.5689	31.2671	27.3772	26.9914	7.69819	31	0	0.033611	0.187138	0.642137	0.131078	0.144347	0.946397	9.22079e+06	2.37269e+07	7.9466e+07	4.68725e+08	5.44614e+08	6.22044e+08	0	0	0.0124225	0.012346	0.0659725	0.0941881	-0.324354
bsv	crypto	2025	8	2025-08-31	25.9315	25.9117	25.2701	29.8604	26.9033	26.5542	4.59032	31	0	0.0364983	0.203214	0.697299	0.145296	0.138371	0.942528	7.66384e+06	2.23719e+07	8.0709e+07	5.02885e+08	5.35485e+08	5.94381e+08	0	0	-0.0314727	-0.0319786	-0.157364	-0.220092	-0.276044
bsv	crypto	2025	9	2025-09-30	25.3712	23.7722	23.2284	26.9214	25.3739	25.7312	3.69299	30	0	0.018669	0.102255	0.356672	0.0898765	0.137177	0.947172	6.19168e+06	1.09101e+07	1.81655e+07	4.62814e+08	5.0527e+08	5.35872e+08	0	0	-0.0825687	-0.0861775	-0.842774	-0.958844	-0.278599
bsv	crypto	2025	10	2025-10-31	26.9532	22.0548	20.5252	28.6057	23.5146	22.2972	8.08052	31	0	0.0564732	0.314429	1.07892	0.244881	0.28248	0.95332	4.83151e+06	1.50717e+07	3.83184e+07	4.09091e+08	4.68729e+08	5.70082e+08	0	0	-0.0722476	-0.0749904	-0.238497	-0.306232	-0.289908
bsv	crypto	2025	11	2025-11-30	22.9666	20.7206	20.4295	25.6179	22.1784	21.881	5.18844	30	0	0.0336113	0.184097	0.642144	0.125996	0.202531	0.953537	6.21282e+06	1.12154e+07	1.65804e+07	4.0759e+08	4.42403e+08	5.10955e+08	0	0	-0.0604932	-0.0624002	-0.338953	-0.495257	-0.267223
bsv	crypto	2025	12	2025-12-31	20.228	17.3104	17.2847	21.4529	19.1692	18.9445	4.16815	31	0	0.0268194	0.149324	0.512385	0.115249	0.194293	0.960689	5.04333e+06	9.145e+06	1.74329e+07	3.45041e+08	3.82636e+08	4.28103e+08	0	0	-0.164579	-0.17982	-1.20422	-1.56027	-0.301661
bsv	crypto	2026	1	2026-01-31	17.768	15.6925	15.6925	21.1703	18.7221	18.7144	5.4778	31	0	0.0362532	0.201849	0.692616	0.13157	0.25875	0.964311	4.21855e+06	1.12911e+07	7.87362e+07	3.13563e+08	3.73974e+08	4.22776e+08	0	0	-0.0934676	-0.0981285	-0.486148	-0.745828	-0.334455
bsv	crypto	2026	2	2026-02-28	15.3159	15.7655	12.445	17.4545	15.4886	15.669	5.00945	28	0	0.0570142	0.301691	1.08926	0.182616	0.211272	0.971696	4.7119e+06	9.78681e+06	5.28887e+07	2.48703e+08	3.09594e+08	3.48883e+08	0	0	0.00465183	0.00464104	0.0153834	0.0254143	-0.321688
bsv	crypto	2026	3	2026-03-31	15.17	13.8415	13.0734	15.6341	14.4853	14.4392	2.56065	31	0	0.0379872	0.211504	0.725744	0.125161	0.150331	0.970267	4.11228e+06	9.15032e+06	3.46178e+07	2.61447e+08	2.89727e+08	3.12713e+08	0	0	-0.122038	-0.130152	-0.615365	-1.03988	-0.313028
bsv	crypto	2026	4	2026-04-30	14.0134	15.7852	14.0134	16.8586	15.763	15.8289	2.84519	30	0	0.0372303	0.203919	0.711283	0.107905	0.098826	0.968129	4.42099e+06	8.36505e+06	2.40348e+07	2.80391e+08	3.15502e+08	3.37365e+08	0	0	0.140426	0.131402	0.644383	1.21775	-0.257432
btc	crypto	2016	1	2016-01-31	434.678	366.342	366.342	459.209	411.039	409.298	92.8673	31	0	0.0434327	0.237891	0.829781	0.187431	0.202233	0.202233	1.67242e+07	3.40501e+07	1.02767e+08	5.54929e+09	6.20224e+09	6.91375e+09	0	0
btc	crypto	2016	2	2016-02-29	371.223	437.776	368.098	440.196	403.377	406.151	72.0976	29	0	0.0205652	0.110747	0.392898	0.056254	0.0485184	0.198408	1.98992e+07	3.60345e+07	5.4515e+07	5.58191e+09	6.13747e+09	6.70618e+09	0	0	0.194993	0.178141	1.60853	3.16672
btc	crypto	2016	3	2016-03-31	432.808	415.957	397.314	432.808	414.857	415.266	35.4934	31	0	0.0134133	0.0746821	0.256261	0.0608401	0.0820073	0.134785	2.36322e+07	5.27213e+07	1.10956e+08	6.07233e+09	6.3574e+09	6.60833e+09	0	0	-0.0498407	-0.0511256	-0.684577	-0.840328
btc	crypto	2016	4	2016-04-30	417.201	449.9	417.201	469.609	435.388	429.498	52.4081	30	0	0.0135203	0.0740536	0.258304	0.0563669	0.0508245	0.0914797	1.64095e+07	3.89082e+07	6.84892e+07	6.41791e+09	6.72192e+09	7.268e+09	0	0	0.0816038	0.078445	1.0593	1.39169
btc	crypto	2016	5	2016-05-31	455.011	530.944	437.724	533.493	462.954	454.486	95.769	31	0	0.0252876	0.140796	0.483119	0.0546964	0.0555343	0.067896	1.98564e+07	5.62202e+07	1.40134e+08	6.812e+09	7.20022e+09	8.32422e+09	0	0	0.180136	0.16563	1.17638	3.02816
btc	crypto	2016	6	2016-06-30	537.614	674.285	537.614	767.42	643.11	642.903	229.806	30	0	0.0476378	0.260923	0.910119	0.169269	0.224893	0.224893	4.02077e+07	1.29239e+08	3.27552e+08	8.39214e+09	1.00748e+10	1.20222e+10	0	0	0.269974	0.238997	0.915966	1.41194
btc	crypto	2016	7	2016-07-31	677.512	624.804	624.804	702.739	662.624	661.394	77.9348	31	0	0.0231938	0.129138	0.443117	0.104592	0.110901	0.185838	3.41569e+07	8.64201e+07	2.08397e+08	9.86472e+09	1.04433e+10	1.1051e+10	0	0	-0.0733819	-0.0762138	-0.590175	-0.728674
btc	crypto	2016	8	2016-08-31	606.509	572.273	526.981	606.509	579.149	578.875	79.5281	31	0	0.0313349	0.174465	0.598652	0.14775	0.131124	0.313308	1.74429e+07	5.84245e+07	2.857e+08	8.32226e+09	9.16144e+09	9.57703e+09	0	0	-0.0840771	-0.0878231	-0.503384	-0.594404
btc	crypto	2016	9	2016-09-30	572.222	608.866	572.222	630.55	606.28	607.617	58.3285	30	0	0.0119279	0.0653317	0.227882	0.0361626	0.055484	0.254357	1.9249e+07	4.42067e+07	1.07078e+08	9.06878e+09	9.62517e+09	1.00013e+10	0	0	0.0639434	0.0619822	0.948731	1.71399
btc	crypto	2016	10	2016-10-31	615.408	698.898	610.008	715.445	642.668	636.598	105.438	31	0	0.0142011	0.0790685	0.271312	0.0297031	0.0231293	0.205119	1.90516e+07	3.77297e+07	8.95808e+07	9.70586e+09	1.024e+10	1.14159e+10	0	0	0.147868	0.137906	1.74414	4.64283
btc	crypto	2016	11	2016-11-30	730.578	742.204	689.939	751.214	725.358	730.217	61.2746	30	0	0.0206027	0.112846	0.393615	0.0818024	0.068112	0.100963	2.72795e+07	5.62716e+07	1.11586e+08	1.10153e+10	1.15982e+10	1.20168e+10	0	0	0.0619643	0.0601203	0.532765	0.734945
btc	crypto	2016	12	2016-12-31	753.675	968.971	752.671	979.961	825.365	782.23	227.29	31	0	0.0192806	0.10735	0.368355	0.037084	0.0266581	0.0266581	2.17895e+07	7.1752e+07	1.72525e+08	1.20624e+10	1.32457e+10	1.57476e+10	0	0	0.305531	0.26661	2.48356	7.18935
btc	crypto	2017	1	2017-01-31	997.257	968.499	788.315	1134.5	912.79	906.499	346.182	31	0	0.0499315	0.278007	0.953939	0.225051	0.305141	0.305141	2.54603e+07	1.3792e+08	5.01682e+08	1.2689e+10	1.47019e+10	1.82463e+10	0	0	-0.00048659	-0.000486708	-0.00175071	-0.00216266
btc	crypto	2017	2	2017-02-28	987.533	1188.4	982.752	1194.15	1066.56	1044.59	211.401	28	0	0.022402	0.11854	0.427989	0.077321	0.0672654	0.133755	3.32488e+07	1.13387e+08	3.30837e+08	1.58755e+10	1.72412e+10	1.93309e+10	0	0	0.227053	0.204616	1.72613	2.64631
btc	crypto	2017	3	2017-03-31	1228.46	1081.74	935.063	1289.36	1129.1	1111.82	354.3	31	0	0.051703	0.28787	0.987784	0.228406	0.274787	0.274787	8.98209e+07	2.90242e+08	6.47744e+08	1.51808e+10	1.83121e+10	2.08819e+10	0	0	-0.0897479	-0.0940337	-0.326653	-0.411696
btc	crypto	2017	4	2017-04-30	1089.52	1381.96	1089.52	1381.96	1220.1	1210.61	292.432	30	0	0.0161791	0.0886165	0.309101	0.0393432	0.0465338	0.15499	9.2645e+07	2.29422e+08	4.63397e+08	1.77042e+10	1.986e+10	2.25304e+10	0	0	0.277527	0.244926	2.76389	6.22538
btc	crypto	2017	5	2017-05-31	1436.94	2299.43	1436.94	2415.01	1887.75	1808.75	978.066	31	0	0.0459704	0.255952	0.878263	0.155138	0.153501	0.153501	2.95823e+08	8.09235e+08	1.64085e+09	2.34295e+10	3.08397e+10	3.94845e+10	0	0	0.663897	0.509162	1.98929	3.282
btc	crypto	2017	6	2017-06-30	2399.89	2452.71	2399.89	2974.21	2616.2	2576.22	574.327	30	0	0.0464078	0.254186	0.88662	0.188802	0.18974	0.18974	4.36454e+08	8.9617e+08	1.80153e+09	3.92767e+10	4.28886e+10	4.8735e+10	0	0	0.0666597	0.064532	0.253877	0.341796
btc	crypto	2017	7	2017-07-31	2412.37	2862.61	1910.75	2862.61	2509.2	2551.93	951.862	31	0	0.0640607	0.356675	1.22388	0.189936	0.26738	0.357562	2.64521e+08	5.95841e+08	1.22173e+09	3.14351e+10	4.12822e+10	4.71784e+10	0	0	0.167121	0.15454	0.433279	0.81364
btc	crypto	2017	8	2017-08-31	2727.39	4740.36	2690.15	4740.36	3874.59	4085.81	2050.21	31	0	0.0370462	0.206264	0.707766	0.0868415	0.0852417	0.0955106	3.67455e+08	9.48934e+08	1.71978e+09	4.43461e+10	6.39782e+10	7.83863e+10	0	0	0.655955	0.504378	2.4453	5.80803
btc	crypto	2017	9	2017-09-30	4918.17	4334.54	3247.47	4918.17	4102.38	4159.66	1670.7	30	0	0.0586611	0.3213	1.12072	0.239619	0.339699	0.339699	4.85814e+08	9.52362e+08	2.29316e+09	5.37978e+10	6.79654e+10	8.13373e+10	0	0	-0.0856078	-0.0894957	-0.278543	-0.373492
btc	crypto	2017	10	2017-10-31	4382.09	6428.51	4216.68	6428.51	5348.38	5614.08	2211.83	31	0	0.033764	0.18799	0.64506	0.0844611	0.0849776	0.142631	5.27733e+08	1.20661e+09	2.8162e+09	7.00143e+10	8.8943e+10	1.07079e+11	0	0	0.483089	0.394127	2.09653	4.66637
btc	crypto	2017	11	2017-11-30	6726.41	9996.71	5829.1	9996.71	7781.03	7590.12	4167.62	30	0	0.046537	0.254894	0.889088	0.143549	0.217698	0.217698	1.50035e+09	2.89575e+09	8.92174e+09	9.72084e+10	1.29833e+11	1.67061e+11	0	0	0.555058	0.441513	1.73215	3.07571
btc	crypto	2017	12	2017-12-31	10809	13921.5	10809	19640.5	15194.1	15389	8831.56	31	0	0.0761758	0.424129	1.45534	0.237036	0.340714	0.340714	2.83091e+09	7.67962e+09	2.28198e+10	1.80659e+11	2.54437e+11	3.28899e+11	0	0	0.392606	0.331176	0.780839	1.39716
btc	crypto	2018	1	2018-01-31	13464.7	10050.1	9959.55	17103.6	12891.1	12768.4	7144.04	31	0	0.0644298	0.35873	1.23093	0.293753	0.417693	0.492908	2.90306e+09	6.51396e+09	1.28817e+10	1.6768e+11	2.16631e+11	2.87108e+11	0	0	-0.278087	-0.325851	-0.908346	-1.10927
btc	crypto	2018	2	2018-02-28	9039.87	10307	6849.54	11245.9	9396.6	9535.26	4396.39	28	0	0.073255	0.387629	1.39953	0.278407	0.249949	0.651254	2.33792e+09	3.71917e+09	6.35381e+09	1.15402e+11	1.58497e+11	1.89794e+11	0	0	0.0255648	0.0252435	0.0651229	0.0906713
btc	crypto	2018	3	2018-03-31	10923.6	6922.28	6832.15	11540.7	8992.05	8771.75	4708.51	31	0	0.0462739	0.257642	0.884062	0.229616	0.407993	0.65214	1.8971e+09	2.92639e+09	4.48928e+09	1.15797e+11	1.52152e+11	1.95062e+11	0	0	-0.328392	-0.39808	-1.54509	-1.73368
btc	crypto	2018	4	2018-04-30	6804.52	9228.73	6610.49	9652.21	8018.05	8026.7	3041.72	30	0	0.0451592	0.247347	0.862765	0.145816	0.109194	0.663426	1.34882e+09	2.76509e+09	5.51135e+09	1.12127e+11	1.36167e+11	1.64063e+11	0	0	0.333191	0.287576	1.16264	1.97219
btc	crypto	2018	5	2018-05-31	9072.17	7478.74	7110.82	9795.93	8423.25	8419.76	2685.1	31	0	0.028611	0.159299	0.546612	0.132296	0.274104	0.637951	1.23799e+09	2.34968e+09	4.16744e+09	1.21317e+11	1.43501e+11	1.66701e+11	0	0	-0.189624	-0.210256	-1.31988	-1.58928
btc	crypto	2018	6	2018-06-30	7519.84	6375.54	5858.64	7702.16	6769.32	6666.79	1843.52	30	0	0.0377142	0.206569	0.720529	0.179272	0.239351	0.701707	8.28274e+08	1.4978e+09	2.5144e+09	1.00305e+11	1.15726e+11	1.31499e+11	0	0	-0.147512	-0.159596	-0.772601	-0.890245
btc	crypto	2018	7	2018-07-31	6361.4	7725.13	6159.47	8397.62	7118.68	6737.86	2238.15	31	0	0.0328587	0.18295	0.627765	0.100048	0.0858418	0.68639	7.66399e+08	1.55399e+09	2.87687e+09	1.05609e+11	1.22122e+11	1.44176e+11	0	0	0.211683	0.19201	1.04952	1.91918
btc	crypto	2018	8	2018-08-31	7596.7	7025.14	6135.75	7596.7	6677.73	6563.08	1460.95	31	0	0.0293917	0.163646	0.561527	0.129975	0.192313	0.687597	1.07275e+09	1.55691e+09	2.2129e+09	1.05548e+11	1.14947e+11	1.30545e+11	0	0	-0.0906123	-0.0949838	-0.580423	-0.730786
btc	crypto	2018	9	2018-09-30	7192.35	6604.49	6187.79	7358.81	6590.2	6498.01	1171.02	30	0	0.024306	0.13313	0.464366	0.111611	0.159132	0.684948	1.0395e+09	1.6217e+09	2.75666e+09	1.06782e+11	1.13816e+11	1.26937e+11	0	0	-0.0598786	-0.0617463	-0.463806	-0.553229
btc	crypto	2018	10	2018-10-31	6561.81	6306.32	6159.25	6604.69	6415.11	6409.41	445.434	31	0	0.0144003	0.0801773	0.275117	0.0653301	0.0674421	0.686401	8.3531e+08	1.2742e+09	3.21391e+09	1.06661e+11	1.11147e+11	1.14339e+11	0	0	-0.0451463	-0.0461971	-0.576187	-0.707134
btc	crypto	2018	11	2018-11-30	6342.98	3973.33	3700.29	6500.87	5345.76	5546.97	2800.58	30	0	0.0532911	0.291887	1.01812	0.269765	0.430801	0.811599	8.51866e+08	1.60881e+09	3.75634e+09	6.43674e+10	9.28878e+10	1.12887e+11	0	0	-0.369944	-0.461946	-1.58262	-1.7124
btc	crypto	2018	12	2018-12-31	4148.07	3687.2	3185.07	4148.07	3665.74	3697.73	963	31	0	0.0449634	0.250346	0.859025	0.171166	0.232156	0.837831	6.0447e+08	1.19905e+09	2.53248e+09	5.54997e+10	6.38855e+10	7.21868e+10	0	0	-0.0720136	-0.0747382	-0.29854	-0.436641
btc	crypto	2019	1	2019-01-31	3808.12	3410.13	3395.82	4045.99	3659.23	3609.43	650.17	31	0	0.0280308	0.156069	0.535527	0.12336	0.160695	0.827101	6.52272e+08	8.48506e+08	1.62954e+09	5.94559e+10	6.39798e+10	7.06712e+10	0	0	-0.0751433	-0.0781165	-0.500526	-0.633237	1.46162
btc	crypto	2019	2	2019-02-28	3445.05	3792.95	3358.87	4110.15	3659.2	3616.87	751.278	28	0	0.0277743	0.146968	0.530626	0.0953744	0.0866069	0.828982	4.99732e+08	9.6776e+08	2.02962e+09	5.88662e+10	6.41816e+10	7.2152e+10	0	0	0.112258	0.106393	0.723919	1.11553	1.39578
btc	crypto	2019	3	2019-03-31	3810.63	4094.32	3698.16	4094.32	3923.42	3910.36	396.156	31	0	0.0126139	0.070231	0.240987	0.0354664	0.0303713	0.811707	7.35336e+08	1.39333e+09	2.11283e+09	6.49802e+10	6.90258e+10	7.21444e+10	0	0	0.0794554	0.0764566	1.08865	2.15575	1.51396
btc	crypto	2019	4	2019-04-30	4138.42	5266.62	4138.42	5544.86	5145.8	5169.31	1406.44	30	0	0.0369173	0.202204	0.705304	0.0849727	0.0752389	0.789292	1.33363e+09	2.51641e+09	5.98201e+09	7.29285e+10	9.08177e+10	9.79311e+10	0	0	0.286324	0.251788	1.24522	2.96317	1.6828
btc	crypto	2019	5	2019-05-31	5315.18	8556.22	5315.18	8816.79	7292.92	7798.91	3501.61	31	0	0.0489491	0.272537	0.935172	0.121078	0.114083	0.729377	1.46476e+09	4.14932e+09	6.67552e+09	9.39562e+10	1.29139e+11	1.56288e+11	0	0	0.624614	0.48527	1.78056	4.00791	2.0209
btc	crypto	2019	6	2019-06-30	8554.81	10842.6	7634.07	12863.5	9393.02	8935.05	5229.39	30	0	0.0537538	0.294422	1.02696	0.209059	0.1571	0.61131	2.37325e+09	5.08453e+09	1.54781e+10	1.35506e+11	1.66865e+11	2.28744e+11	0	0	0.26722	0.236826	0.804376	1.13282	2.01848
btc	crypto	2019	7	2019-07-31	10569.6	10059	9446.67	12579.1	10659.6	10589.7	3132.44	31	0	0.0534632	0.29767	1.02141	0.220661	0.249019	0.519021	1.99192e+09	5.07552e+09	9.37061e+09	1.68545e+11	1.89958e+11	2.24021e+11	0	0	-0.0722715	-0.0750162	-0.252011	-0.339961	2.01981
btc	crypto	2019	8	2019-08-31	10400.3	9605.02	9482.31	11967.3	10628.7	10400.3	2484.96	31	0	0.0343488	0.191246	0.656233	0.14289	0.207646	0.517207	1.42903e+09	3.23906e+09	5.64225e+09	1.69775e+11	1.90036e+11	2.13781e+11	0	0	-0.0451317	-0.0461818	-0.241478	-0.323198	2.06656
btc	crypto	2019	9	2019-09-30	9762.94	8282.37	8064.51	10618.8	9792.42	10182.9	2554.27	30	0	0.0294664	0.161394	0.562954	0.139524	0.240543	0.589394	1.25523e+09	2.51547e+09	6.19061e+09	1.44877e+11	1.75652e+11	1.90226e+11	0	0	-0.137705	-0.148158	-0.917989	-1.06188	1.83716
btc	crypto	2019	10	2019-10-31	8314.55	9155.28	7454.37	9558.16	8387.16	8254.34	2103.78	31	0	0.0385536	0.214657	0.736566	0.105773	0.133045	0.620459	1.29248e+09	2.53111e+09	9.56056e+09	1.34263e+11	1.5094e+11	1.72202e+11	0	0	0.105394	0.100202	0.466799	0.947327	1.79767
btc	crypto	2019	11	2019-11-30	9251.38	7556.19	6943.38	9418.36	8339.69	8491.43	2474.98	30	0	0.0265701	0.145531	0.507621	0.123916	0.262782	0.646477	1.50025e+09	2.44283e+09	5.30346e+09	1.25438e+11	1.50522e+11	1.69809e+11	0	0	-0.174662	-0.191963	-1.31906	-1.54914	1.54605
btc	crypto	2019	12	2019-12-31	7417.73	7167.4	6608.96	7534.21	7246.17	7235.63	925.246	31	0	0.0254126	0.141491	0.485507	0.0805386	0.122806	0.663504	1.19345e+09	1.96863e+09	3.61453e+09	1.19669e+11	1.31195e+11	1.36273e+11	0	0	-0.0514543	-0.0528253	-0.373346	-0.655901	1.25612
btc	crypto	2020	1	2020-01-31	7170.63	9357.28	6946.83	9508.92	8365.74	8423.39	2562.1	31	0	0.0284096	0.158178	0.542764	0.0680729	0.0653444	0.646301	9.45065e+08	2.58073e+09	5.48858e+09	1.25998e+11	1.51969e+11	1.72976e+11	0	0	0.305535	0.266613	1.68553	3.91658	1.49641
btc	crypto	2020	2	2020-02-29	9381.89	8582.09	8582.09	10361.6	9646.19	9683.08	1779.53	29	0	0.0278725	0.150098	0.532504	0.114869	0.171742	0.563041	1.83994e+09	3.97008e+09	6.12436e+09	1.56577e+11	1.75747e+11	1.88763e+11	0	0	-0.082844	-0.0864777	-0.576141	-0.75284	1.23556
btc	crypto	2020	3	2020-03-31	8541.77	6432.38	4959.31	9147.09	6885.04	6486.41	4187.77	31	0	0.103011	0.573539	1.96802	0.503907	0.457826	0.747496	2.78892e+09	5.21945e+09	1.44768e+10	9.05945e+10	1.25797e+11	1.66996e+11	0	0	-0.250488	-0.288332	-0.502725	-0.572194	1.07501
btc	crypto	2020	4	2020-04-30	6643.11	8652.41	6625.48	8761.84	7224.35	7125.72	2136.36	30	0	0.0361455	0.197977	0.69056	0.0906915	0.101289	0.662663	2.32304e+09	4.06558e+09	1.13529e+10	1.21426e+11	1.3241e+11	1.60802e+11	0	0	0.345133	0.296493	1.49761	3.26925	1.11661
btc	crypto	2020	5	2020-05-31	8855.54	9433.94	8591.65	9993.75	9264.67	9266.81	1402.1	31	0	0.0351571	0.195747	0.671676	0.135516	0.140298	0.562555	2.7365e+09	4.71539e+09	8.50007e+09	1.57872e+11	1.70256e+11	1.83562e+11	0	0	0.0903254	0.0864762	0.441776	0.638127	0.795814
btc	crypto	2020	6	2020-06-30	10199.1	9143.97	9002.17	10199.1	9478.76	9452.43	1196.97	30	0	0.0266766	0.146114	0.509656	0.106331	0.11736	0.541653	1.90927e+09	3.20925e+09	6.72709e+09	1.65788e+11	1.74461e+11	1.87578e+11	0	0	-0.0307375	-0.0312199	-0.213668	-0.293611	0.72921
btc	crypto	2020	7	2020-07-31	9241.34	11338.2	9066.69	11338.2	9597.28	9260.36	2271.51	31	0	0.0220789	0.12293	0.421817	0.0341566	0.0320074	0.538368	1.62614e+09	3.29987e+09	1.00758e+10	1.67029e+11	1.76923e+11	2.09165e+11	0	0	0.239965	0.215083	1.74964	6.29696	0.771075
btc	crypto	2020	8	2020-08-31	11797.6	11678.3	11094	12315.8	11648.2	11682.3	1221.74	31	0	0.0233594	0.13006	0.44628	0.096076	0.0812852	0.435146	2.96424e+09	4.9038e+09	8.0428e+09	2.0468e+11	2.15056e+11	2.27393e+11	0	0	0.0300004	0.0295592	0.227275	0.307665	0.46433
btc	crypto	2020	9	2020-09-30	11970.4	10772.4	10108.6	11970.4	10647.2	10673.2	1861.73	30	0	0.0287453	0.157445	0.549179	0.135707	0.155528	0.485317	2.21575e+09	4.02224e+09	8.71078e+09	1.86843e+11	1.96875e+11	2.21177e+11	0	0	-0.0775792	-0.0807537	-0.512902	-0.595061	0.46955
btc	crypto	2020	10	2020-10-31	10606.6	13807.2	10555.7	13807.2	11895.1	11489.6	3251.53	31	0	0.0187506	0.104399	0.358229	0.0411062	0.0281668	0.462555	1.53134e+09	3.32744e+09	7.2369e+09	1.95354e+11	2.20289e+11	2.55857e+11	0	0	0.281729	0.24821	2.37752	6.03826	0.38438
btc	crypto	2020	11	2020-11-30	13736.9	19664.4	13595.6	19664.4	16670.6	16536.6	6068.84	30	0	0.0368202	0.201673	0.703449	0.109138	0.106978	0.30778	2.56333e+09	6.57154e+09	1.48914e+10	2.51954e+11	3.09168e+11	3.64944e+11	0	0	0.424211	0.353618	1.75342	3.24009	0.335041
btc	crypto	2020	12	2020-12-31	18820.6	29022.7	18061.8	29022.7	21995.9	21370.7	10960.9	31	0	0.0327387	0.182281	0.625472	0.0843153	0.0723435	0.0814999	3.22939e+09	8.37269e+09	1.91083e+10	3.35377e+11	4.08553e+11	5.39438e+11	0	0	0.475899	0.389267	2.13553	4.6168	0.367488
btc	crypto	2021	1	2021-01-31	29380.7	33157.8	29380.7	40775.4	34752.9	34166.1	11394.7	31	0	0.0563354	0.313662	1.07629	0.209732	0.25546	0.25546	9.45032e+09	1.91484e+10	4.15868e+10	5.4612e+11	6.46469e+11	7.58211e+11	0	0	0.14248	0.133202	0.424666	0.635104	0.730325
btc	crypto	2021	2	2021-02-28	33570.3	45359.5	33570.3	57500.7	46316.1	47366.9	23930.4	28	0	0.0504442	0.266926	0.963735	0.139747	0.21115	0.21115	1.48236e+10	2.26177e+10	4.65264e+10	6.24961e+11	8.6286e+11	1.07153e+12	0	0	0.367986	0.31334	1.17388	2.2422	0.95457
btc	crypto	2021	3	2021-03-31	49634.4	58792.2	48304.7	61288.8	54933.5	56019.8	12984.1	31	0	0.0360073	0.20048	0.687919	0.112728	0.158947	0.159929	1.15055e+10	1.94541e+10	2.86131e+10	9.00543e+11	1.02485e+12	1.14322e+12	0	0	0.29614	0.25939	1.29384	2.30102	1.64996
btc	crypto	2021	4	2021-04-30	58819	57741.4	48946.9	63445.6	57105.5	57852.4	14498.7	30	0	0.034314	0.187946	0.655568	0.11492	0.228522	0.228522	1.46086e+10	2.33505e+10	4.40979e+10	9.1488e+11	1.06691e+12	1.18528e+12	0	0	-0.0178723	-0.0180339	-0.0959529	-0.156926	1.33654
btc	crypto	2021	5	2021-05-31	57863.6	37313	34681.8	58736.1	46507.4	46022.5	24054.3	31	0	0.0533261	0.296907	1.01879	0.254678	0.409532	0.453362	1.22426e+10	2.82013e+10	7.47864e+10	6.49288e+11	8.70125e+11	1.09859e+12	0	0	-0.353792	-0.436634	-1.47061	-1.71446	1.26886
btc	crypto	2021	6	2021-06-30	36661.4	35065.5	31683.5	40455.6	35811.8	35691.7	8772.09	30	0	0.0505093	0.276651	0.964978	0.198636	0.216833	0.50062	9.1493e+09	1.51628e+10	2.72962e+10	5.93831e+11	6.70949e+11	7.57933e+11	0	0	-0.060234	-0.0621243	-0.224559	-0.312755	1.36989
btc	crypto	2021	7	2021-07-31	33505.1	41793.3	29766.7	41793.3	34412.3	33782.9	12026.7	31	0	0.0303929	0.169221	0.580656	0.09812	0.158078	0.530832	5.71862e+09	9.66358e+09	2.52541e+10	5.58478e+11	6.45535e+11	7.84565e+11	0	0	0.191865	0.17552	1.03722	1.78883	1.35257
btc	crypto	2021	8	2021-08-31	39969	47219.2	38288.8	49590.9	45747	46646.9	11302.1	31	0	0.031162	0.173503	0.595349	0.098593	0.062941	0.39651	1.01564e+10	1.41595e+10	1.79232e+10	7.18888e+11	8.59526e+11	9.3208e+11	0	0	0.129828	0.122065	0.703535	1.23807	1.72415
btc	crypto	2021	9	2021-09-30	48688.5	43781.5	40526.5	52640.6	45927.5	46184.3	12114.1	30	0	0.0405844	0.22229	0.775363	0.179774	0.230128	0.361241	9.66179e+09	1.51784e+10	3.54433e+10	7.62806e+11	8.6421e+11	9.90093e+11	0	0	-0.0728029	-0.0755891	-0.340048	-0.420467	1.8164
btc	crypto	2021	10	2021-10-31	48078.1	61433	47792.4	66061.8	57915.5	60394	18269.4	31	0	0.0337448	0.187883	0.644693	0.090994	0.113507	0.246718	9.89919e+09	1.65581e+10	2.62055e+10	9.00067e+11	1.0915e+12	1.24522e+12	0	0	0.40317	0.338734	1.8029	3.7226	2.47295
btc	crypto	2021	11	2021-11-30	61092.1	57097	53800.6	67541.8	60684.6	60664.2	13741.1	30	0	0.0331181	0.181396	0.632721	0.14154	0.203447	0.203447	1.00948e+10	1.61123e+10	2.57435e+10	1.01597e+12	1.14537e+12	1.27435e+12	0	0	-0.0705803	-0.0731949	-0.40351	-0.517132	3.51861
btc	crypto	2021	12	2021-12-31	57180.6	46355.1	46334.5	57180.6	49357	49082.1	10846.1	31	0	0.0319923	0.178125	0.611211	0.156911	0.189682	0.313988	7.10989e+09	1.31873e+10	3.33053e+10	8.75884e+11	9.3296e+11	1.08004e+12	0	0	-0.188134	-0.20842	-1.17008	-1.32827	3.25811
btc	crypto	2022	1	2022-01-31	47560	38462.7	34996.4	47560	41113.1	41817	12563.6	31	0	0.0284784	0.158561	0.544079	0.145648	0.264163	0.481855	5.1429e+09	1.05692e+10	2.15631e+10	6.6273e+11	7.78298e+11	8.997e+11	0	0	-0.17026	-0.186643	-1.17711	-1.28147	3.055
btc	crypto	2022	2	2022-02-28	38788	43179.3	36942.3	44511.9	40756.4	40845	7569.58	28	0	0.0432121	0.228657	0.825566	0.124441	0.166559	0.453045	4.37839e+09	9.551e+09	2.06664e+10	6.9995e+11	7.72678e+11	8.43913e+11	0	0	0.122628	0.115672	0.505875	0.929529	3.07208
btc	crypto	2022	3	2022-03-31	44334.5	45562.2	37808.3	47463.7	41973.9	41826.1	9655.39	31	0	0.032743	0.182306	0.625555	0.124661	0.147202	0.440223	4.92698e+09	1.01167e+10	1.68375e+10	7.17694e+11	7.96905e+11	9.0169e+11	0	0	0.0551875	0.0537185	0.294662	0.430918	3.03032
btc	crypto	2022	4	2022-04-30	46250.3	37714.1	37714.1	46663	41441.3	40500.5	8948.91	30	0	0.0257645	0.141118	0.492229	0.1271	0.191777	0.441618	3.69071e+09	9.17967e+09	1.48426e+10	7.17578e+11	7.87916e+11	8.86726e+11	0	0	-0.172251	-0.189045	-1.33962	-1.48737	2.28023
btc	crypto	2022	5	2022-05-31	38459.2	31831.4	28612	39641.9	31706.8	30257.9	11029.8	31	0	0.0411047	0.228861	0.785304	0.189576	0.278237	0.57638	4.07528e+09	1.19046e+10	3.46574e+10	5.45089e+11	6.03724e+11	7.54411e+11	0	0	-0.155981	-0.16958	-0.740975	-0.894524	1.14039
btc	crypto	2022	6	2022-06-30	29825.9	19332.9	19013.9	31333.7	24352.6	21770.6	12319.8	30	0	0.0485274	0.265795	0.927114	0.254538	0.393181	0.718487	3.56737e+09	1.0853e+10	2.99444e+10	3.62611e+11	4.64339e+11	5.9722e+11	0	0	-0.392647	-0.498645	-1.87605	-1.95902	0.310243
btc	crypto	2022	7	2022-07-31	19341.9	23356.2	19231.8	23950.7	21545.2	21510.1	4718.91	31	0	0.0314782	0.175263	0.601389	0.0910366	0.113444	0.71526	4.50101e+09	1.10223e+10	1.98267e+10	3.67007e+11	4.11424e+11	4.57627e+11	0	0	0.208104	0.189052	1.07868	2.07666	0.473056
btc	crypto	2022	8	2022-08-31	23331.4	20024.7	19673.5	24426.2	22362.4	22996.3	4752.68	31	0	0.0270196	0.150438	0.516208	0.134572	0.194573	0.70872	5.05101e+09	1.06791e+10	1.74787e+10	3.76451e+11	4.27638e+11	4.67046e+11	0	0	-0.142639	-0.153896	-1.02298	-1.14359	0.404909
btc	crypto	2022	9	2022-09-30	20105.5	19435.2	18506.8	22365.2	19792.9	19549.4	3858.45	30	0	0.0336699	0.184418	0.643262	0.132442	0.17252	0.725995	5.86146e+09	1.50643e+10	2.8149e+10	3.54534e+11	3.79069e+11	4.28262e+11	0	0	-0.0294375	-0.0298795	-0.162021	-0.225604	0.479872
btc	crypto	2022	10	2022-10-31	19311.9	20490.9	19015.3	20803.9	19647.7	19416.2	1788.61	31	0	0.0168944	0.0940642	0.322767	0.0498313	0.0642378	0.718466	4.77478e+09	1.18919e+10	2.24583e+10	3.64471e+11	3.76862e+11	3.99286e+11	0	0	0.0543171	0.0528933	0.56231	1.06145	0.449534
btc	crypto	2022	11	2022-11-30	20484	17176.9	15758.3	21283.5	17579.6	16668.4	5525.18	30	0	0.044932	0.246103	0.858426	0.20504	0.2596	0.766688	4.0167e+09	1.42074e+10	4.84212e+10	3.02605e+11	3.37668e+11	4.08626e+11	0	0	-0.161729	-0.176413	-0.716828	-0.860385	0.437069
btc	crypto	2022	12	2022-12-31	16961.3	16524.2	16424.1	17809.7	16937.2	16879.9	1385.59	31	0	0.0149532	0.0832558	0.28568	0.0622764	0.0777998	0.75683	3.60818e+09	7.84208e+09	1.30849e+10	3.15971e+11	3.2579e+11	3.4255e+11	0	0	-0.0379976	-0.0387383	-0.465293	-0.622039	0.439183
btc	crypto	2023	1	2023-01-31	16606.8	23130.1	16606.8	23775	20239.9	21010.9	7168.24	31	0	0.0235192	0.13095	0.449334	0.0503724	0.0410334	0.754126	3.183e+09	1.23538e+10	2.11885e+10	3.19671e+11	3.89921e+11	4.58297e+11	0	0	0.399767	0.336306	2.56821	6.67639	0.481656
btc	crypto	2023	2	2023-02-28	23727.2	23145.9	21620.6	24797.8	23303.4	23400.7	3177.28	28	0	0.025229	0.133499	0.481999	0.0751381	0.0887857	0.679893	8.11353e+09	1.47415e+10	2.43281e+10	4.16996e+11	4.49562e+11	4.78525e+11	0	0	0.000687297	0.000687061	0.00514655	0.00914398	0.536184
btc	crypto	2023	3	2023-03-31	23610.7	28514.7	20240.4	28514.7	25123.2	25043.2	8274.27	31	0	0.0359685	0.200264	0.687178	0.105099	0.142743	0.700328	4.81376e+09	1.56165e+10	3.12891e+10	3.90916e+11	4.85386e+11	5.5129e+11	0	0	0.231951	0.208599	1.04162	1.98478	0.87922
btc	crypto	2023	4	2023-04-30	28494.6	29362.1	27292	30459	28855.6	28439.4	3166.95	30	0	0.0204843	0.112197	0.391352	0.0756614	0.103974	0.595924	2.57579e+09	6.78367e+09	1.52124e+10	5.28172e+11	5.58287e+11	5.89267e+11	0	0	0.0297182	0.0292852	0.261016	0.387056	0.687721
btc	crypto	2023	5	2023-05-31	28115	27217.7	26341.4	29553	27516.3	27226.9	3211.54	31	0	0.0185815	0.103457	0.354999	0.0814523	0.108671	0.609998	1.91527e+09	5.60182e+09	8.49161e+09	5.10566e+11	5.3313e+11	5.72292e+11	0	0	-0.0730331	-0.0758374	-0.73303	-0.931065	0.579455
btc	crypto	2023	6	2023-06-30	26825.4	30484.5	25097.6	30667.1	27760.9	26952.4	5569.49	30	0	0.0248872	0.136313	0.475469	0.0772277	0.0791644	0.628414	2.85809e+09	6.67461e+09	1.48256e+10	4.86948e+11	5.38667e+11	5.95361e+11	0	0	0.120026	0.113352	0.831556	1.46776	0.675599
btc	crypto	2023	7	2023-07-31	30581.7	29219.8	29178.4	31434.7	30050.3	30143.7	2256.38	31	0	0.0127492	0.0709847	0.243574	0.0549952	0.0717797	0.567995	1.93131e+09	4.72704e+09	1.07904e+10	5.67173e+11	5.83904e+11	6.10728e+11	0	0	-0.0414861	-0.0423712	-0.596906	-0.770453	0.50754
btc	crypto	2023	8	2023-08-31	29499.6	25954.9	25954.9	29779.5	27845.2	28754.3	3824.64	31	0	0.0213011	0.1186	0.406958	0.0987094	0.128432	0.615721	1.36486e+09	5.31388e+09	1.36872e+10	5.0541e+11	5.41833e+11	5.79259e+11	0	0	-0.111738	-0.118488	-0.999059	-1.20037	0.417233
btc	crypto	2023	9	2023-09-30	25802.8	26977.7	25135	27215.1	26306.3	26287.7	2080.01	30	0	0.011952	0.0654639	0.228343	0.0398742	0.0410355	0.627859	1.16611e+09	3.77481e+09	7.23987e+09	4.89698e+11	5.12634e+11	5.30432e+11	0	0	0.0394079	0.0386512	0.59042	0.969329	0.489719
btc	crypto	2023	10	2023-10-31	27950.1	34636.4	26741.3	34636.4	29748.9	28328.1	7895.09	31	0	0.0225453	0.125527	0.430728	0.0353583	0.0440218	0.604077	1.88281e+09	6.56845e+09	1.95765e+10	5.21774e+11	5.80584e+11	6.76432e+11	0	0	0.283891	0.249896	1.99077	7.06753	0.490763
btc	crypto	2023	11	2023-11-30	35432	37712.7	34708.2	37846.9	36604.6	36827.6	3138.63	30	0	0.0210686	0.115398	0.402516	0.0713755	0.0477139	0.486122	2.93566e+09	7.54619e+09	1.59481e+10	6.77927e+11	7.15402e+11	7.40148e+11	0	0	0.0888165	0.0850913	0.737374	1.19216	0.331621
btc	crypto	2023	12	2023-12-31	38703.6	42217.2	38703.6	44205.1	42548	42670.7	5501.5	31	0	0.0232018	0.129182	0.443269	0.079822	0.067756	0.426968	4.51514e+09	9.65404e+09	1.72602e+10	7.56975e+11	8.32756e+11	8.64843e+11	0	0	0.119441	0.11283	0.873415	1.41351	0.182011
btc	crypto	2024	1	2024-01-31	44049.5	42589.5	39577.1	46981.3	42911.8	42773.7	7404.22	31	0	0.0293045	0.16316	0.559861	0.116676	0.157599	0.414035	3.51621e+09	1.22117e+10	2.47153e+10	7.75929e+11	8.41079e+11	9.20508e+11	0	0	0.00881897	0.00878031	0.053814	0.0752538	0.119043
btc	crypto	2024	2	2024-02-29	43020.4	61394.8	42576.3	62460.7	49872.9	51292.3	19884.4	29	0	0.0241241	0.129912	0.46089	0.0296117	0.0290378	0.36963	5.4025e+09	1.33348e+10	3.77482e+10	8.35274e+11	9.78968e+11	1.22674e+12	0	0	0.441548	0.365718	2.81512	12.3505	0.145233
btc	crypto	2024	3	2024-03-31	62524.4	71227.5	61969.3	73081.6	67711.9	68285.1	11112.3	31	0	0.0385994	0.214912	0.737441	0.139869	0.152053	0.152053	7.92655e+09	2.27258e+10	5.07647e+10	1.21824e+12	1.33095e+12	1.43631e+12	0	0	0.160155	0.148553	0.691228	1.06209	0.0903476
btc	crypto	2024	4	2024-04-30	69791.6	60636.3	60636.3	71712.8	65915.2	65251	11076.5	30	0	0.0272233	0.149108	0.5201	0.127254	0.154456	0.170293	7.49152e+09	1.64093e+10	2.65727e+10	1.19406e+12	1.29739e+12	1.4111e+12	0	0	-0.148694	-0.160984	-1.07965	-1.26506	0.0224891
btc	crypto	2024	5	2024-05-31	58141.8	67377.8	58141.8	71202.2	65255.6	66259.5	13060.4	31	0	0.0280367	0.156102	0.535641	0.0778944	0.0537124	0.204426	5.45505e+09	1.23483e+10	2.47375e+10	1.14496e+12	1.2855e+12	1.40275e+12	0	0	0.111178	0.105421	0.675334	1.35338	0.297849
btc	crypto	2024	6	2024-06-30	67714.4	62763.3	60259	71087.4	65903.2	66344.4	10828.5	30	0	0.0173389	0.0949693	0.33126	0.0772511	0.152326	0.175456	2.93998e+09	1.01278e+10	1.93493e+10	1.1881e+12	1.29913e+12	1.401e+12	0	0	-0.0684867	-0.0709448	-0.747029	-0.918366	0.292958
btc	crypto	2024	7	2024-07-31	62835.4	64690.6	56112.6	68170.7	62837.6	64201.4	12058.1	31	0	0.023336	0.129929	0.445833	0.0829176	0.106991	0.232193	6.04128e+09	1.20248e+10	2.35967e+10	1.10666e+12	1.23958e+12	1.34516e+12	0	0	0.0307083	0.0302462	0.23279	0.364775	0.214446
btc	crypto	2024	8	2024-08-31	65178.1	58959.9	54343.6	65178.1	59963	59411.5	10834.4	31	0	0.0352379	0.196196	0.673219	0.13116	0.166228	0.256398	4.3457e+09	1.39533e+10	4.88824e+10	1.07252e+12	1.18372e+12	1.28624e+12	0	0	-0.0885864	-0.0927584	-0.472784	-0.707214	0.105096
btc	crypto	2024	9	2024-09-30	57349.1	63260	53839	65770.5	60337.9	60122.7	11931.6	30	0	0.0225857	0.123707	0.4315	0.0812668	0.0899283	0.263303	4.85678e+09	1.19965e+10	2.12291e+10	1.06334e+12	1.19196e+12	1.29963e+12	0	0	0.0729329	0.0703959	0.569053	0.866232	0.178549
btc	crypto	2024	10	2024-10-31	60858.2	70367.1	60221.1	72678.8	65582.6	66647.3	12457.7	31	0	0.0205623	0.114486	0.392842	0.0677233	0.0409105	0.175974	4.14734e+09	1.28208e+10	2.32708e+10	1.19032e+12	1.29649e+12	1.43721e+12	0	0	0.112346	0.106472	0.929998	1.57216	0.0633354
btc	crypto	2024	11	2024-11-30	69483.6	96463.6	67779.1	98938.3	86569.1	90468.5	31159.3	30	0	0.0317591	0.173952	0.606757	0.0690111	0.0713857	0.0725556	5.74721e+09	2.55769e+10	5.29899e+10	1.34051e+12	1.71262e+12	1.95758e+12	0	0	0.370863	0.31544	1.81338	4.57086	0.268808
btc	crypto	2024	12	2024-12-31	97469.6	93389.7	92523.2	106116	98247	97617.4	13592.7	31	0	0.0226437	0.126075	0.432607	0.0912264	0.128093	0.128093	8.0314e+09	2.33808e+10	5.75696e+10	1.83227e+12	1.94498e+12	2.10081e+12	0	0	-0.0318658	-0.0323846	-0.256868	-0.354991	0.408671
btc	crypto	2025	1	2025-01-31	94455.8	102263	92346.2	105988	100008	100955	13641.7	31	0	0.0226262	0.125977	0.432272	0.0821999	0.0962364	0.129761	6.30785e+09	2.21049e+10	5.13176e+10	1.82917e+12	1.98127e+12	2.09995e+12	0	0	0.0950138	0.0907669	0.720504	1.10422	0.604637
btc	crypto	2025	2	2025-02-28	100610	84243.8	83987.9	101582	95251.2	96538	17594.5	28	0	0.0211126	0.111717	0.403355	0.102202	0.173204	0.208527	5.61705e+09	1.8651e+10	5.4468e+10	1.66543e+12	1.88828e+12	2.01328e+12	0	0	-0.176205	-0.193834	-1.73504	-1.89658	0.39156
btc	crypto	2025	3	2025-03-31	85844.4	82461.4	79006	94328	85064.3	84309.1	15322	31	0	0.0349472	0.194578	0.667665	0.137065	0.162434	0.255475	2.96986e+09	1.4156e+10	3.18017e+10	1.56708e+12	1.68747e+12	1.87064e+12	0	0	-0.0211568	-0.0213838	-0.109899	-0.156012	0.343087
btc	crypto	2025	4	2025-04-30	85226.7	94236.7	76351.4	95066	86436.3	84764.8	18714.6	30	0	0.0295174	0.161673	0.563928	0.0963468	0.104137	0.28049	3.43418e+09	1.28662e+10	3.2546e+10	1.51546e+12	1.71593e+12	1.88775e+12	0	0	0.142797	0.133479	0.825611	1.3854	0.635352
btc	crypto	2025	5	2025-05-31	96411.7	104709	94377.8	111477	103629	103981	17099.2	31	0	0.0176295	0.0981569	0.336811	0.0532435	0.06724	0.110616	4.87955e+09	1.37789e+10	4.85417e+10	1.87434e+12	2.05867e+12	2.21486e+12	0	0	0.111127	0.105375	1.07353	1.97911	1.01318
btc	crypto	2025	6	2025-06-30	105750	107153	100899	110198	105807	105739	9298.92	30	0	0.0168333	0.0921998	0.3216	0.0551121	0.0843837	0.0948875	2.88854e+09	1.09297e+10	1.97417e+10	2.00609e+12	2.10337e+12	2.19035e+12	0	0	0.0233422	0.0230739	0.25026	0.418673	2.63139
btc	crypto	2025	7	2025-07-31	105566	115848	105566	120068	115354	117619	14501.6	31	0	0.0139607	0.0777299	0.266719	0.0404174	0.035144	0.0530213	2.97035e+09	1.29609e+10	2.61725e+10	2.09929e+12	2.29475e+12	2.38886e+12	0	0	0.0811478	0.0780233	1.00377	1.93044	2.41157
btc	crypto	2025	8	2025-08-31	113282	108316	108316	123443	114846	115035	15126.2	31	0	0.0187631	0.104469	0.358468	0.0804677	0.122536	0.122536	5.63882e+09	1.32135e+10	2.59538e+10	2.15704e+12	2.28626e+12	2.45723e+12	0	0	-0.0650151	-0.0672249	-0.643495	-0.835428	3.90118
btc	crypto	2025	9	2025-09-30	108992	113972	108992	117014	113171	113026	8022.1	30	0	0.0126616	0.0693505	0.2419	0.0476003	0.0670693	0.117061	4.44295e+09	1.25078e+10	2.28125e+10	2.17055e+12	2.25454e+12	2.33124e+12	0	0	0.0522109	0.0508935	0.73386	1.06919	4.14858
btc	crypto	2025	10	2025-10-31	118393	109554	106626	124824	114120	112981	18198.8	31	0	0.0222733	0.124013	0.425531	0.0955359	0.145795	0.145795	5.86524e+09	2.08973e+10	4.79081e+10	2.12568e+12	2.27502e+12	2.48787e+12	0	0	-0.0387596	-0.0395308	-0.318764	-0.413779	3.86604
btc	crypto	2025	11	2025-11-30	110005	90607.7	84775	110389	96282	94342.4	25614.2	30	0	0.0236539	0.129558	0.451907	0.115189	0.232035	0.320846	5.65988e+09	1.72824e+10	3.68028e+10	1.69145e+12	1.92074e+12	2.20154e+12	0	0	-0.172942	-0.189881	-1.46561	-1.64842	3.39993
btc	crypto	2025	12	2025-12-31	86504.6	87517	85434.2	93609.1	88915.9	88292.5	8174.9	31	0	0.0197746	0.1101	0.377794	0.0765095	0.0873302	0.315565	3.2606e+09	1.20793e+10	2.27241e+10	1.70559e+12	1.77501e+12	1.86816e+12	0	0	-0.0341111	-0.0347064	-0.315225	-0.453622	3.0386
btc	crypto	2026	1	2026-01-31	88684.2	78702.4	78702.4	97044	90477.8	90539.6	18341.6	31	0	0.0230228	0.128185	0.439849	0.10872	0.189003	0.369495	2.99847e+09	1.25332e+10	2.25899e+10	1.57269e+12	1.80743e+12	1.93853e+12	0	0	-0.100719	-0.106159	-0.828171	-0.97645	1.57209
btc	crypto	2026	2	2026-02-28	76911.1	66965.6	63494.7	78716.6	68855.5	68029.6	15221.9	28	0	0.0410958	0.217458	0.785134	0.168556	0.193376	0.491328	4.75298e+09	1.54859e+10	4.46304e+10	1.26892e+12	1.37638e+12	1.57303e+12	0	0	-0.149128	-0.161494	-0.742643	-0.958103	1.00704
btc	crypto	2026	3	2026-03-31	65733.5	68214.9	65733.5	74724	69532.6	69891.8	8990.44	31	0	0.0254658	0.141788	0.486524	0.0916409	0.117194	0.473392	4.61414e+09	1.12215e+10	2.20362e+10	1.31444e+12	1.39085e+12	1.49469e+12	0	0	0.0186548	0.018483	0.130357	0.201689	0.799677
btc	crypto	2026	4	2026-04-30	68116.8	76299.6	66891.7	78538.8	73725.3	74697.4	11647	30	0	0.0198106	0.108507	0.37848	0.0566353	0.0416171	0.464113	2.71385e+09	8.40041e+09	1.35507e+10	1.33857e+12	1.47573e+12	1.57243e+12	0	0	0.118519	0.112005	1.03224	1.97766	0.88829
btg	crypto	2017	10	2017-10-31	152.159	163.682	121.981	163.682	141.396	140.297	41.7009	7	0	0.145972	0.357558	2.7888	0.167634	0.198335	0.198335	5.31466e+06	1.03338e+07	1.68547e+07	2.03006e+09	2.35318e+09	2.72407e+09	0	0
btg	crypto	2017	11	2017-11-30	154.01	282.897	121.661	470.18	226.453	173.703	348.519	30	0	0.265015	1.45155	5.06311	0.87559	0.741247	0.741247	7.05257e+06	8.96192e+07	6.24268e+08	2.03902e+09	3.78804e+09	7.82496e+09	2	0	0.728337	0.54716	0.376949	0.624904
btg	crypto	2017	12	2017-12-31	299.749	240.704	219.213	396.566	278.906	278.006	177.353	31	0	0.0970585	0.540399	1.8543	0.389947	0.431191	0.533768	5.25935e+07	1.56496e+08	6.60896e+08	3.68257e+09	4.68847e+09	6.66932e+09	0	0	-0.149144	-0.161513	-0.298877	-0.414192
btg	crypto	2018	1	2018-01-31	237.377	154.52	154.52	318.299	216.955	218.996	163.779	31	0	0.111486	0.620727	2.12993	0.464096	0.514543	0.671359	2.50409e+07	1.74127e+08	8.09335e+08	2.61097e+09	3.65924e+09	5.36741e+09	0	0	-0.358049	-0.443243	-0.714071	-0.955068
btg	crypto	2018	2	2018-02-28	128.572	109.182	85.9344	143.736	118.372	117.403	57.8021	28	0	0.0986929	0.522234	1.88552	0.409835	0.331622	0.817231	1.17636e+07	3.52306e+07	6.93019e+07	1.45288e+09	2.00355e+09	2.43355e+09	0	0	-0.293417	-0.347315	-0.665057	-0.847451
btg	crypto	2018	3	2018-03-31	112.604	43.453	43.453	112.604	72.8019	64.8134	69.151	31	0	0.0601592	0.334952	1.14934	0.325293	0.614108	0.907582	4.86411e+06	1.32436e+07	2.56715e+07	7.39352e+08	1.23615e+09	1.90916e+09	0	0	-0.602011	-0.921331	-2.75063	-2.83232
btg	crypto	2018	4	2018-04-30	40.6857	72.7339	39.2479	83.7622	55.8876	50.159	44.5143	30	0	0.0778318	0.426302	1.48697	0.25242	0.155152	0.916526	3.37907e+06	1.97076e+07	8.54235e+07	6.68281e+08	9.5291e+08	1.42925e+09	0	0	0.673851	0.515127	1.20836	2.04075
btg	crypto	2018	5	2018-05-31	71.0676	44.1814	40.336	79.5066	57.8729	56.8142	39.1706	31	0	0.0529294	0.294698	1.01121	0.263818	0.492671	0.914211	6.04421e+06	1.26527e+07	3.35349e+07	6.91074e+08	9.89911e+08	1.35846e+09	0	0	-0.392561	-0.498503	-1.69157	-1.88957
btg	crypto	2018	6	2018-06-30	43.7739	25.9633	23.2545	46.5057	34.1024	32.404	23.2513	30	0	0.062227	0.340831	1.18884	0.318711	0.499966	0.950541	5.12717e+06	8.07767e+06	1.37102e+07	3.99815e+08	5.85376e+08	7.97329e+08	0	0	-0.412348	-0.53162	-1.55978	-1.66803
btg	crypto	2018	7	2018-07-31	26.6042	26.1032	25.3956	32.04	29.0275	29.4385	6.64444	31	0	0.0505542	0.281474	0.965836	0.197613	0.185293	0.945987	3.74767e+06	1.04376e+07	5.28545e+07	4.37291e+08	5.00041e+08	5.52394e+08	0	0	0.00539006	0.00537558	0.019098	0.0272025
btg	crypto	2018	8	2018-08-31	25.6786	22.4153	15.6949	25.7203	20.7157	20.1816	10.0254	31	0	0.0675265	0.375972	1.29009	0.276171	0.389784	0.966619	2.6178e+06	4.61852e+06	8.24789e+06	2.71181e+08	3.5799e+08	4.44036e+08	0	0	-0.141283	-0.152316	-0.405127	-0.551529
btg	crypto	2018	9	2018-09-30	22.1566	25.8687	18.5706	26.9744	21.622	21.3058	8.40373	30	0	0.041066	0.224928	0.784564	0.129993	0.161845	0.960503	2.72174e+06	6.04257e+06	1.85811e+07	3.21705e+08	3.7488e+08	4.68253e+08	0	0	0.154066	0.143291	0.637055	1.1023
btg	crypto	2018	10	2018-10-31	25.3602	26.2132	23.5938	27.9174	26.0491	26.2132	4.32365	31	0	0.0311951	0.173687	0.595982	0.126638	0.154873	0.94982	1.06421e+06	2.02694e+07	1.89821e+08	4.10117e+08	4.53028e+08	4.85022e+08	0	0	0.0133159	0.013228	0.0761599	0.104455
btg	crypto	2018	11	2018-11-30	26.4785	18.2221	17.4404	31.9284	24.6811	26.2488	14.4879	30	0	0.0668172	0.365973	1.27654	0.322157	0.453764	0.962907	1.56334e+06	2.65371e+08	8.09858e+08	3.04591e+08	4.30517e+08	5.56472e+08	0	0	-0.304848	-0.363625	-0.993584	-1.12872
btg	crypto	2018	12	2018-12-31	18.3627	12.3332	10.6959	18.3627	13.5029	13.4076	7.6668	31	0	0.0611043	0.340215	1.1674	0.258435	0.417521	0.977252	8.04988e+06	2.54469e+08	6.13128e+08	1.87143e+08	2.363e+08	3.20862e+08	0	0	-0.323176	-0.390344	-1.14735	-1.51041
btg	crypto	2019	1	2019-01-31	12.9632	9.80308	9.52997	13.6509	11.7288	11.692	4.12091	31	0	0.0392349	0.218451	0.749582	0.187622	0.301879	0.979731	2.457e+07	2.2981e+08	4.1327e+08	1.67512e+08	2.05893e+08	2.39408e+08	0	0	-0.205146	-0.229597	-1.05102	-1.22372
btg	crypto	2019	2	2019-02-28	9.95672	12.4304	9.1568	13.3051	10.9021	10.2167	4.14828	28	0	0.0437816	0.231671	0.836447	0.100854	0.0803396	0.980525	797338	1.35143e+08	5.0149e+08	1.61101e+08	1.9199e+08	2.34489e+08	0	0	0.268009	0.237448	1.02494	2.35437
btg	crypto	2019	3	2019-03-31	12.4008	12.9585	11.5814	13.4768	12.6613	12.5974	1.89544	31	0	0.026757	0.148977	0.511191	0.0960524	0.0984566	0.975368	820859	1.5426e+06	4.57887e+06	2.04296e+08	2.23623e+08	2.38023e+08	0	0	0.0424817	0.0416041	0.279266	0.433139
btg	crypto	2019	4	2019-04-30	13.2837	15.9398	13.2837	18.9988	16.5032	16.4704	5.71509	30	0	0.0509196	0.278898	0.972818	0.16074	0.214178	0.971748	1.26335e+06	4.07361e+06	2.06246e+07	2.34992e+08	2.92371e+08	3.36299e+08	0	0	0.230073	0.207074	0.74247	1.28825
btg	crypto	2019	5	2019-05-31	16.4968	29.1888	16.3999	29.1888	21.9038	22.7026	12.7889	31	0	0.051804	0.288433	0.989714	0.133418	0.159866	0.96512	1.49289e+06	6.9321e+06	4.08273e+07	2.91029e+08	3.8929e+08	5.1949e+08	0	0	0.831187	0.604964	2.09742	4.53436
btg	crypto	2019	6	2019-06-30	28.5308	26.2978	24.3875	31.3066	27.4418	27.1783	6.91905	30	0	0.0465594	0.255016	0.889516	0.212935	0.164954	0.948131	2.7992e+06	5.57005e+06	1.48719e+07	4.34432e+08	4.89171e+08	5.58579e+08	0	0	-0.0990448	-0.1043	-0.408993	-0.48982
btg	crypto	2019	7	2019-07-31	26.0947	18.6181	18.1591	30.3179	25.1514	26.4018	12.1588	31	0	0.0460614	0.256459	0.880002	0.227782	0.401044	0.961378	2.5844e+06	5.79549e+06	1.52813e+07	3.25136e+08	4.49662e+08	5.41863e+08	0	0	-0.292028	-0.345351	-1.34661	-1.51615
btg	crypto	2019	8	2019-08-31	17.8811	10.7363	10.7363	17.9009	14.5082	13.9855	7.16465	31	0	0.0371167	0.206657	0.709114	0.211991	0.400239	0.977166	857993	2.49308e+06	9.11113e+06	1.92848e+08	2.6018e+08	3.20642e+08	0	0	-0.423344	-0.550509	-2.66387	-2.59685
btg	crypto	2019	9	2019-09-30	10.9401	7.72535	7.39724	11.2776	9.85975	10.2522	3.88031	30	0	0.0462104	0.253105	0.882849	0.239157	0.344074	0.984267	393281	921222	1.82338e+06	1.33255e+08	1.77362e+08	2.02611e+08	0	0	-0.280443	-0.32912	-1.30033	-1.37617
btg	crypto	2019	10	2019-10-31	7.69228	8.08605	6.90924	8.51767	7.83995	7.8513	1.60842	31	0	0.0424454	0.236326	0.810918	0.170506	0.188834	0.985305	445923	878512	1.92341e+06	1.24761e+08	1.41469e+08	1.53592e+08	0	0	0.0466907	0.0456335	0.193095	0.267636
btg	crypto	2019	11	2019-11-30	8.06438	6.37326	6.15042	8.79752	7.64061	7.91221	2.6471	30	0	0.032199	0.176361	0.61516	0.15504	0.300892	0.986919	385497	744009	2.07568e+06	1.11422e+08	1.38277e+08	1.59141e+08	0	0	-0.211821	-0.238029	-1.34967	-1.53528
btg	crypto	2019	12	2019-12-31	6.44533	5.28673	4.90836	6.44533	5.56614	5.49923	1.53696	31	0	0.0302203	0.16826	0.577358	0.127582	0.238461	0.989561	326397	566339	1.14839e+06	8.91142e+07	1.01041e+08	1.16834e+08	0	0	-0.170482	-0.18691	-1.11085	-1.46502
btg	crypto	2020	1	2020-01-31	5.28647	10.9523	5.07864	15.3756	9.18311	10.0743	10.297	31	0	0.129467	0.720843	2.47347	0.247115	0.365325	0.989199	356188	1.0492e+07	8.96796e+07	9.23507e+07	1.67253e+08	2.79954e+08	1	0	1.07165	0.728348	1.01041	2.9474
btg	crypto	2020	2	2020-02-29	10.9651	8.20782	8.16842	13.8704	11.0687	11.1059	5.70202	29	0	0.0549853	0.296105	1.05049	0.244174	0.411092	0.982627	3.71097e+06	1.25324e+07	3.51211e+07	1.49338e+08	2.02127e+08	2.53213e+08	0	0	-0.250584	-0.288461	-0.974185	-1.18138
btg	crypto	2020	3	2020-03-31	9.08972	7.21601	5.25385	12.0103	8.04506	7.5376	6.75649	31	0	0.1319	0.734389	2.51995	0.615775	0.562556	0.988826	3.35479e+06	7.89641e+06	2.15557e+07	9.61938e+07	1.47339e+08	2.19751e+08	0	0	-0.120837	-0.128785	-0.175364	-0.209143
btg	crypto	2020	4	2020-04-30	7.30904	9.84425	7.30876	10.1367	9.07783	9.36228	2.82792	30	0	0.0516269	0.282772	0.98633	0.153116	0.126996	0.984455	2.1286e+06	7.68433e+06	1.65382e+07	1.34085e+08	1.66754e+08	1.86158e+08	0	0	0.364224	0.310586	1.09836	2.02843
btg	crypto	2020	5	2020-05-31	10.2453	9.1215	8.57057	10.2453	9.27016	9.14335	1.67472	31	0	0.0312679	0.174092	0.597371	0.137125	0.163462	0.981772	2.43448e+06	4.3466e+06	6.89913e+06	1.57759e+08	1.70568e+08	1.88375e+08	0	0	-0.0734192	-0.076254	-0.43801	-0.556092
btg	crypto	2020	6	2020-06-30	9.56081	10.4137	7.98497	10.5216	8.99741	8.82416	2.53658	30	0	0.0555448	0.304231	1.06118	0.131344	0.164823	0.983017	2.16936e+06	5.02758e+06	3.18727e+07	1.47222e+08	1.65797e+08	1.9401e+08	0	0	0.141668	0.132491	0.435493	1.00873
btg	crypto	2020	7	2020-07-31	10.4415	10.2858	8.33496	10.4415	9.02084	8.93258	2.10656	31	0	0.0402018	0.223834	0.768054	0.178555	0.201748	0.982273	2.41494e+06	5.63964e+06	1.15197e+07	1.53735e+08	1.66476e+08	1.92553e+08	0	0	-0.0122834	-0.0123594	-0.055217	-0.0692192
btg	crypto	2020	8	2020-08-31	10.6644	10.1373	9.61219	11.7294	10.5394	10.4281	2.11717	31	0	0.0329064	0.183215	0.628677	0.14846	0.180502	0.979556	2.41847e+06	5.34424e+06	1.07036e+07	1.7775e+08	1.94791e+08	2.16796e+08	0	0	-0.0144405	-0.0145458	-0.079392	-0.0979783
btg	crypto	2020	9	2020-09-30	10.4687	7.97822	7.406	10.4687	8.31922	8.25325	3.06274	30	0	0.0372484	0.204018	0.711629	0.189567	0.29256	0.984249	793288	1.83849e+06	3.58056e+06	1.37133e+08	1.53983e+08	1.93637e+08	0	0	-0.212982	-0.239504	-1.17394	-1.26342
btg	crypto	2020	10	2020-10-31	7.82359	7.09739	7.09739	8.28734	7.74348	7.74183	1.18996	31	0	0.0224785	0.125155	0.429452	0.0988198	0.143587	0.984905	622504	1.53079e+06	2.84434e+06	1.3166e+08	1.4354e+08	1.53586e+08	0	0	-0.110405	-0.116989	-0.934748	-1.18386	-0.661036
btg	crypto	2020	11	2020-11-30	7.24582	9.69163	6.91923	9.87386	8.23958	7.75263	2.95463	30	0	0.0537362	0.294325	1.02663	0.193204	0.147005	0.985284	1.15553e+06	4.78107e+06	2.67009e+07	1.28367e+08	1.52969e+08	1.83351e+08	0	0	0.36552	0.311535	1.05847	1.61247	-0.688079
btg	crypto	2020	12	2020-12-31	9.08319	8.29166	7.83376	9.77386	8.79068	8.73255	1.9401	31	0	0.0459048	0.255587	0.877009	0.208289	0.197829	0.983339	2.06546e+06	4.46731e+06	9.36028e+06	1.45607e+08	1.63431e+08	1.81746e+08	0	0	-0.144451	-0.156012	-0.610406	-0.749014	-0.689774
btg	crypto	2021	1	2021-01-31	8.44651	10.4504	8.34015	13.6711	11.1326	10.8839	5.33097	31	0	0.0666964	0.37135	1.27423	0.243167	0.295307	0.982262	3.39664e+06	2.03489e+07	1.84309e+08	1.55184e+08	2.07284e+08	2.54523e+08	0	0	0.260355	0.231394	0.623116	0.951584	-0.613566
btg	crypto	2021	2	2021-02-28	10.6028	24.0652	10.6028	33.1792	20.7357	24.7812	22.5764	28	0	0.108386	0.573525	2.07071	0.263695	0.274689	0.977449	4.78164e+06	5.23711e+07	1.9836e+08	1.97569e+08	3.86679e+08	6.18875e+08	0	0	1.3028	0.834124	1.45438	3.16321	-0.416087
btg	crypto	2021	3	2021-03-31	26.4463	39.1578	26.4437	39.1578	31.2082	30.6973	12.7141	31	0	0.0560265	0.311942	1.07038	0.172709	0.190927	0.943758	1.43092e+07	4.02649e+07	2.64943e+08	4.93431e+08	5.82744e+08	7.31692e+08	0	0	0.627152	0.486832	1.56065	2.81879	-0.0367714
btg	crypto	2021	4	2021-04-30	38.5779	93.6827	37.0756	115.084	84.9839	88.6174	78.0088	30	0	0.111183	0.608976	2.12415	0.270899	0.353771	0.921146	2.61064e+07	4.10915e+08	2.02808e+09	6.92883e+08	1.58924e+09	2.15208e+09	0	0	1.39244	0.872313	1.43243	3.22007	0.09493
btg	crypto	2021	5	2021-05-31	95.0479	59.8096	50.3089	138.683	87.5354	92.1842	88.3744	31	0	0.115429	0.64268	2.20526	0.513998	0.637239	0.893001	3.07198e+07	2.14329e+08	1.56228e+09	9.42441e+08	1.63909e+09	2.59586e+09	0	0	-0.361572	-0.448747	-0.698243	-0.873053	0.120665
btg	crypto	2021	6	2021-06-30	57.777	50.4947	33.9091	70.0917	51.9483	54.3166	36.1826	30	0	0.102309	0.560371	1.95462	0.427222	0.516218	0.92788	1.546e+07	1.18295e+08	9.75472e+08	6.36135e+08	9.74196e+08	1.31417e+09	0	0	-0.155742	-0.169297	-0.302116	-0.396274	0.303137
btg	crypto	2021	7	2021-07-31	47.7831	52.0299	34.8018	52.0299	43.6116	44.3146	17.2281	31	0	0.0431359	0.24017	0.82411	0.161909	0.282805	0.925982	1.0963e+07	3.952e+07	2.3359e+08	6.53754e+08	8.19086e+08	9.77898e+08	0	0	0.0304019	0.0299489	0.124699	0.184974	0.315674
btg	crypto	2021	8	2021-08-31	49.903	76.2448	49.903	78.001	64.2757	63.7308	28.0979	31	0	0.0550733	0.306635	1.05217	0.167672	0.133005	0.893864	3.27189e+07	1.25774e+08	8.16582e+08	9.3797e+08	1.20904e+09	1.46805e+09	0	0	0.465405	0.382132	1.24621	2.27904	0.615367
btg	crypto	2021	9	2021-09-30	77.6171	51.5978	49.1103	85.0913	64.4573	65.33	35.9811	30	0	0.0604424	0.331057	1.15475	0.299598	0.422852	0.89555	1.22237e+07	5.4261e+07	2.84415e+08	9.25619e+08	1.21408e+09	1.60188e+09	0	0	-0.323261	-0.39047	-1.17947	-1.30332	0.316026
btg	crypto	2021	10	2021-10-31	56.8131	65.2717	56.8131	73.5973	66.4088	68.0363	16.7842	31	0	0.0520863	0.290004	0.995107	0.162779	0.18773	0.879167	1.55581e+07	7.76832e+07	3.74081e+08	1.07095e+09	1.25273e+09	1.38767e+09	0	0	0.265009	0.235079	0.810605	1.44416	0.434012
btg	crypto	2021	11	2021-11-30	64.4497	55.6572	53.3721	71.4521	61.6245	62.3843	18.0799	30	0	0.0360899	0.197673	0.689497	0.165064	0.253036	0.886486	1.01356e+07	3.3269e+07	1.68284e+08	1.00876e+09	1.16412e+09	1.34939e+09	0	0	-0.1473	-0.159348	-0.806119	-0.965367	0.550644
btg	crypto	2021	12	2021-12-31	55.1727	40.468	40.0435	55.1727	44.1046	42.9412	15.1292	31	0	0.0472985	0.263347	0.903636	0.229087	0.274215	0.914834	5.69266e+06	1.63972e+07	6.48167e+07	7.57448e+08	8.34366e+08	1.04303e+09	0	0	-0.272906	-0.3187	-1.21019	-1.39117	0.593467
btg	crypto	2022	1	2022-01-31	41.303	29.5988	28.2099	42.0597	34.6243	35.8709	13.8498	31	0	0.0383614	0.213587	0.732894	0.193399	0.329288	0.940002	5.58137e+06	1.41544e+07	4.82416e+07	5.34669e+08	6.55961e+08	7.96336e+08	0	0	-0.268588	-0.312778	-1.46441	-1.61727	0.543843
btg	crypto	2022	2	2022-02-28	29.9921	31.9158	27.2974	36.0573	31.5955	31.6928	8.75985	28	0	0.0434797	0.230073	0.830678	0.146965	0.242943	0.941943	3.99915e+06	1.2892e+07	4.80433e+07	5.18058e+08	5.99435e+08	6.83851e+08	0	0	0.0782821	0.0753692	0.327588	0.512839	0.451016
btg	crypto	2022	3	2022-03-31	32.6954	42.0125	28.4615	44.3875	34.8422	31.2107	15.926	31	0	0.0447777	0.249312	0.855476	0.108423	0.129496	0.939467	4.17593e+06	4.09889e+07	2.02668e+08	5.40481e+08	6.62003e+08	8.43671e+08	0	0	0.316352	0.274864	1.10249	2.53512	0.586223
btg	crypto	2022	4	2022-04-30	42.3368	27.7606	27.7606	43.0502	35.3817	34.7576	15.2895	30	0	0.045141	0.247247	0.862417	0.23012	0.355156	0.940957	3.97321e+06	5.09678e+07	3.1987e+08	5.28539e+08	6.73153e+08	8.18635e+08	0	0	-0.339229	-0.414347	-1.67584	-1.80057	0.248067
btg	crypto	2022	5	2022-05-31	28.2214	23.1609	17.1363	30.0291	22.6331	22.5562	12.8928	31	0	0.0829138	0.461645	1.58407	0.319738	0.429343	0.963554	2.70931e+06	2.39361e+07	2.09043e+08	3.26445e+08	4.31225e+08	5.71836e+08	0	0	-0.165694	-0.181155	-0.392413	-0.566574	-0.0906237
btg	crypto	2022	6	2022-06-30	21.8344	15.204	14.7736	22.3275	18.2878	17.262	7.55395	30	0	0.0511999	0.280434	0.978173	0.257821	0.338324	0.968579	3.77726e+06	1.15022e+07	4.18001e+07	2.8186e+08	3.48932e+08	4.25758e+08	0	0	-0.343549	-0.420907	-1.50092	-1.63256	-0.199276
btg	crypto	2022	7	2022-07-31	15.1782	30.7711	14.8958	35.0131	19.6846	17.263	20.1174	31	0	0.0779102	0.433786	1.48847	0.179653	0.140046	0.968319	1.86934e+06	4.25601e+07	2.97894e+08	2.84579e+08	3.76176e+08	6.69449e+08	0	0	1.02388	0.705019	1.62527	3.92434	0.217643
btg	crypto	2022	8	2022-08-31	29.329	22.8245	22.505	31.4535	27.2135	28.3533	8.9485	31	0	0.0438818	0.244324	0.838361	0.223247	0.284499	0.952135	3.42653e+06	2.05504e+07	8.25617e+07	4.30897e+08	5.20739e+08	6.01781e+08	0	0	-0.258248	-0.29874	-1.22272	-1.33816	0.341202
btg	crypto	2022	9	2022-09-30	22.8224	20.5415	20.3783	26.3007	22.6376	22.5734	5.92243	30	0	0.0432899	0.237109	0.827052	0.177749	0.225182	0.956659	1.403e+06	1.19189e+07	7.83145e+07	3.90617e+08	4.33803e+08	5.03876e+08	0	0	-0.100024	-0.105387	-0.444468	-0.5929	0.460051
btg	crypto	2022	10	2022-10-31	20.3558	17.9658	16.7141	21.4115	18.8833	18.2657	4.69743	31	0	0.0585008	0.325718	1.11766	0.187088	0.215802	0.964452	1.11113e+06	2.57689e+07	2.92848e+08	3.20827e+08	3.62373e+08	4.11013e+08	0	0	-0.125392	-0.13398	-0.411336	-0.716132	0.363943
btg	crypto	2022	11	2022-11-30	17.526	15.2835	13.2694	18.5773	15.4912	14.8958	5.30791	30	0	0.0547468	0.29986	1.04594	0.228618	0.28572	0.971778	2.00098e+06	7.88612e+06	2.94732e+07	2.54932e+08	2.977e+08	3.56841e+08	0	0	-0.149301	-0.161697	-0.539241	-0.707281	0.404085
btg	crypto	2022	12	2022-12-31	14.979	11.6267	11.6267	15.1197	13.833	14.0705	3.49297	31	0	0.0283838	0.158034	0.542272	0.147889	0.231021	0.975272	897729	3.78735e+06	1.436e+07	2.23913e+08	2.66208e+08	2.90939e+08	0	0	-0.239261	-0.273465	-1.73042	-1.84913	0.343009
btg	crypto	2023	1	2023-01-31	11.6324	16.4391	11.6324	17.724	15.1741	15.8832	6.09153	31	0	0.0415535	0.23136	0.793879	0.129417	0.0885532	0.97526	579974	1.73437e+07	1.35146e+08	2.24033e+08	2.9246e+08	3.4175e+08	0	0	0.413911	0.34636	1.49706	2.67631	0.165503
btg	crypto	2023	2	2023-02-28	16.901	16.8585	15.8087	19.0737	17.1959	17.1725	3.26504	28	0	0.0300434	0.158975	0.573978	0.101937	0.116139	0.966377	1.75983e+06	1.52313e+07	1.78895e+08	3.05076e+08	3.3187e+08	3.68219e+08	0	0	0.025512	0.025192	0.158465	0.247133	0.309572
btg	crypto	2023	3	2023-03-31	17.0331	14.9805	13.7125	17.3333	15.6331	15.6879	3.62081	31	0	0.0401932	0.223787	0.767891	0.161318	0.196239	0.970836	1.94775e+06	7.73782e+06	6.49789e+07	2.64942e+08	3.02119e+08	3.35024e+08	0	0	-0.111401	-0.118109	-0.527775	-0.732149	0.314746
btg	crypto	2023	4	2023-04-30	14.9947	14.5745	14.3044	16.6061	15.5002	15.6473	2.30168	30	0	0.0260401	0.142628	0.497496	0.100065	0.138605	0.969577	686282	3.63793e+06	3.27987e+07	2.76991e+08	2.9997e+08	3.21369e+08	0	0	-0.0271034	-0.0274775	-0.192652	-0.274596	0.159532
btg	crypto	2023	5	2023-05-31	14.022	12.5297	12.3749	14.2107	13.0791	12.8584	1.83578	31	0	0.0232092	0.129223	0.44341	0.108537	0.129183	0.973681	559594	2.36821e+06	1.73772e+07	2.39926e+08	2.5347e+08	2.75265e+08	0	0	-0.140296	-0.151167	-1.16981	-1.39276	0.127442
btg	crypto	2023	6	2023-06-30	12.3936	16.363	10.602	16.363	12.3452	12.1134	5.76097	30	0	0.077378	0.423817	1.4783	0.250705	0.17671	0.977451	308298	1.03358e+07	1.24556e+08	2.05705e+08	2.39594e+08	3.17775e+08	0	0	0.305931	0.266916	0.629791	1.06466	0.185603
btg	crypto	2023	7	2023-07-31	16.5058	21.5647	13.2099	21.5647	14.5519	13.9948	8.35478	31	0	0.0696869	0.388	1.33137	0.132997	0.199684	0.971905	982473	2.09866e+07	2.20485e+08	2.56858e+08	2.82811e+08	4.1939e+08	0	0	0.317895	0.276036	0.711433	2.07551	0.319533
btg	crypto	2023	8	2023-08-31	16.7787	12.7867	12.7694	16.7787	14.2718	14.4833	4.00936	31	0	0.0601312	0.334796	1.14881	0.307294	0.238955	0.972842	1.09551e+06	1.47578e+07	1.14447e+08	2.48623e+08	2.77754e+08	3.26327e+08	0	0	-0.407051	-0.522647	-1.56109	-1.7008	0.0918725
btg	crypto	2023	9	2023-09-30	12.7023	12.8755	12.2458	13.2323	12.6447	12.6242	0.986523	30	0	0.0182595	0.100012	0.348848	0.0700505	0.0615022	0.973955	519527	2.84982e+06	1.76804e+07	2.38616e+08	2.46441e+08	2.57898e+08	0	0	0.00693778	0.00691382	0.0691302	0.0986976	0.197474
btg	crypto	2023	10	2023-10-31	13.263	14.6879	12.269	15.0841	13.6288	13.5924	2.81518	31	0	0.0347283	0.193359	0.663483	0.0947637	0.117743	0.973906	1.10727e+06	1.25642e+07	6.51443e+07	2.39418e+08	2.65996e+08	2.94503e+08	0	0	0.140771	0.131705	0.68114	1.38982	0.313219
btg	crypto	2023	11	2023-11-30	15.159	15.0509	14.8666	16.8592	15.5866	15.3651	1.9926	30	0	0.0251929	0.137987	0.48131	0.0878055	0.112796	0.968381	1.35164e+06	7.10079e+06	3.01248e+07	2.904e+08	3.04624e+08	3.29412e+08	0	0	0.0247081	0.0244078	0.176884	0.277975	0.180427
btg	crypto	2023	12	2023-12-31	15.4706	20.9415	15.4706	21.6965	17.4637	17.0844	6.22583	31	0	0.0418808	0.233183	0.800132	0.0971812	0.107148	0.967096	1.71541e+06	2.94609e+07	2.05509e+08	3.02573e+08	3.41796e+08	4.24862e+08	0	0	0.39138	0.330296	1.41647	3.39877	0.413095
btg	crypto	2024	1	2024-01-31	21.2546	21.9436	18.39	26.6953	22.0798	22.1481	8.30527	31	0	0.0606666	0.337778	1.15903	0.219339	0.232021	0.960887	4.70791e+06	3.67072e+07	2.17826e+08	3.6028e+08	4.32748e+08	5.23134e+08	0	0	0.047854	0.0467443	0.138388	0.213114	0.320283
btg	crypto	2024	2	2024-02-29	21.7176	26.1913	21.0712	26.1913	23.5966	23.7044	5.12011	29	0	0.0318041	0.17127	0.607616	0.0902485	0.105346	0.955185	3.23774e+06	1.96889e+07	7.4106e+07	4.13357e+08	4.63115e+08	5.14361e+08	0	0	0.193575	0.176953	1.03318	1.96073	0.0326775
btg	crypto	2024	3	2024-03-31	26.9774	48.2168	26.9774	50.7896	42.9251	44.0002	23.8122	31	0	0.0715149	0.398178	1.36629	0.199277	0.283632	0.942623	2.14646e+07	1.03802e+08	4.96294e+08	5.29823e+08	8.43625e+08	9.97805e+08	0	0	0.840945	0.610279	1.53268	3.06247	0.08201
btg	crypto	2024	4	2024-04-30	45.9442	28.6775	28.6775	46.2488	37.2023	34.2408	17.5713	30	0	0.0466511	0.255519	0.891269	0.243174	0.379931	0.939007	2.69601e+06	1.50784e+07	4.0615e+07	5.64662e+08	7.32102e+08	9.09878e+08	0	0	-0.405239	-0.519596	-2.03349	-2.13673	-0.37225
btg	crypto	2024	5	2024-05-31	27.6923	32.4466	27.6923	42.5534	34.0909	33.9869	14.8611	31	0	0.0928539	0.516989	1.77397	0.344826	0.281484	0.941103	4.12943e+06	2.11285e+07	1.10188e+08	5.45276e+08	6.715e+08	8.38089e+08	0	0	0.131433	0.123485	0.238854	0.358107	-0.217603
btg	crypto	2024	6	2024-06-30	32.2554	24.5925	23.2093	33.2679	27.8142	27.4101	10.0586	30	0	0.0336424	0.184267	0.642738	0.166606	0.302352	0.950637	1.1009e+06	4.75859e+06	1.92067e+07	4.57502e+08	5.48231e+08	6.55583e+08	0	0	-0.242062	-0.277153	-1.50408	-1.66352	-0.251587
btg	crypto	2024	7	2024-07-31	24.2574	25.8054	21.3044	27.2729	24.358	24.5814	5.96844	31	0	0.033729	0.187795	0.644392	0.115647	0.121735	0.954689	1.52221e+06	1.43972e+07	1.97245e+08	4.20115e+08	4.80455e+08	5.38104e+08	0	0	0.0493192	0.0481415	0.256351	0.416281	-0.24594
btg	crypto	2024	8	2024-08-31	24.9285	21.5025	20.0186	24.9285	22.0153	21.7052	4.90987	31	0	0.0354556	0.197408	0.677378	0.145801	0.196958	0.957424	529633	3.19158e+06	9.92422e+06	3.95037e+08	4.34548e+08	4.91882e+08	0	0	-0.166746	-0.182417	-0.924058	-1.25114	-0.406153
btg	crypto	2024	9	2024-09-30	20.7457	23.1063	19.8967	24.9187	22.1141	21.8172	5.02195	30	0	0.0281319	0.154085	0.537459	0.100633	0.0727296	0.957683	639573	3.12679e+06	1.06992e+07	3.92917e+08	4.36804e+08	4.92324e+08	0	0	0.0745899	0.0719391	0.46688	0.714863	-0.28585
btg	crypto	2024	10	2024-10-31	21.8698	22.1216	20.6223	23.5317	22.192	22.1146	2.90938	31	0	0.0298383	0.166133	0.57006	0.111343	0.103944	0.95614	883153	4.09153e+06	1.18933e+07	4.0755e+08	4.38642e+08	4.65163e+08	0	0	-0.0426187	-0.0435535	-0.262161	-0.391163	-0.368415
btg	crypto	2024	11	2024-11-30	21.6617	34.9032	20.673	34.9032	28.4834	30.4939	14.2302	30	0	0.0406156	0.222461	0.77596	0.0928353	0.0786008	0.956032	1.35398e+06	3.85894e+07	2.5543e+08	4.08793e+08	5.63402e+08	6.90589e+08	0	0	0.577789	0.456025	2.04991	4.91219	-0.182089
btg	crypto	2024	12	2024-12-31	35.4471	9.87629	9.38414	39.6324	23.0073	21.7486	30.2483	31	0	0.0781901	0.435344	1.49382	0.463098	0.763221	0.980041	1.40591e+07	7.62833e+07	2.3947e+08	1.85798e+08	4.55344e+08	7.84232e+08	0	0	-0.717038	-1.26244	-2.89987	-2.72608	-0.471693
btg	crypto	2025	1	2025-01-31	9.58448	7.78485	7.62719	16.9979	10.8214	10.0995	9.3707	31	0	0.111881	0.622929	2.13749	0.314582	0.551286	0.983778	1.69061e+06	2.28583e+08	1.97767e+09	1.51118e+08	2.1433e+08	3.3659e+08	1	0	-0.211764	-0.237957	-0.381998	-0.756425	-0.428473
btg	crypto	2025	2	2025-02-28	7.33625	4.99668	4.78535	7.33625	5.72935	5.79241	2.5509	28	0	0.0724297	0.383262	1.38377	0.310077	0.347712	0.989822	1.78129e+06	2.50386e+07	1.67003e+08	9.4872e+07	1.13554e+08	1.4536e+08	0	0	-0.358153	-0.443405	-1.15692	-1.42998	-0.514338
btg	crypto	2025	3	2025-03-31	4.59309	0.713815	0.713815	4.82552	3.2746	3.63591	4.11171	31	0	0.186788	1.03999	3.56858	1.06171	0.852075	0.998482	5550.67	5.61643e+06	1.86118e+07	1.41619e+07	6.49416e+07	9.5675e+07	1	0	-0.857142	-1.9459	-1.87108	-1.8328	-0.754083
btg	crypto	2025	4	2025-04-30	0.734806	0.687736	0.46388	1.10185	0.781903	0.77729	0.637974	30	0	0.208778	1.14352	3.9887	0.622136	0.470889	0.999013	9.99982	2387.82	32650.5	9.20367e+06	1.55181e+07	2.18723e+07	2	0	-0.036535	-0.0372191	-0.0325478	-0.0598248	-0.718734
btg	crypto	2025	5	2025-05-31	0.750339	0.778584	0.628035	0.960176	0.742857	0.726694	0.332141	31	0	0.0958131	0.533465	1.83051	0.333862	0.345917	0.998664	28.7046	907.421	7740.66	1.24718e+07	1.47532e+07	1.90637e+07	0	0	0.132097	0.124071	0.232576	0.371625	-0.687062
btg	crypto	2025	6	2025-06-30	0.752354	0.570607	0.570607	0.778306	0.679974	0.689395	0.207699	30	0	0.0579619	0.31747	1.10736	0.241982	0.26686	0.998786	3.8946	319.464	5582.39	1.13439e+07	1.35135e+07	1.54681e+07	0	0	-0.267121	-0.310775	-0.978911	-1.28429	-0.67316
btg	crypto	2025	7	2025-07-31	0.679868	0.567657	0.551206	0.754428	0.64408	0.63718	0.203222	31	0	0.0724366	0.40331	1.3839	0.28093	0.269372	0.998828	0.000617544	135.754	714.363	1.09643e+07	1.2809e+07	1.50013e+07	0	0	-0.00517055	-0.00518397	-0.0128536	-0.0184529	-0.744536
btg	crypto	2025	8	2025-08-31	0.594389	0.498996	0.414787	0.663255	0.521028	0.504282	0.248468	31	0	0.0938723	0.522659	1.79343	0.374946	0.374619	0.999118	0	403.37	4976.76	8.25425e+06	1.03689e+07	1.31967e+07	0	0	-0.120955	-0.12892	-0.246661	-0.343835	-0.727915
btg	crypto	2025	9	2025-09-30	0.440232	1.80006	0.381048	1.80914	0.858841	0.720727	1.42809	30	0	0.181494	0.994081	3.46743	0.511036	0.31184	0.99919	0.626983	1163.55	9228.91	7.58777e+06	1.71053e+07	3.60383e+07	1	0	2.60737	1.28298	1.29062	2.51055	-0.56164
btg	crypto	2025	10	2025-10-31	1.60103	0.89961	0.89961	1.81071	1.38105	1.47827	0.911096	31	0	0.106444	0.592653	2.0336	0.506577	0.503172	0.998087	19.3314	2.23442e+06	1.34423e+07	1.7934e+07	2.75214e+07	3.60776e+07	0	0	-0.500234	-0.693616	-1.17036	-1.36922	-0.638019
btg	crypto	2025	11	2025-11-30	0.749582	0.616132	0.593081	1.21134	0.848366	0.898984	0.618256	30	0	0.122477	0.670835	2.33992	0.466328	0.510391	0.998739	53080.7	133111	870789	1.18308e+07	1.69181e+07	2.41527e+07	1	0	-0.315112	-0.378499	-0.564221	-0.811658	-0.663985
btg	crypto	2025	12	2025-12-31	0.510191	0.578999	0.314538	0.65293	0.504621	0.510191	0.338392	31	0	0.180147	1.00302	3.4417	0.833763	0.518267	0.999331	54315.7	57961	64573.4	6.27512e+06	1.00701e+07	1.30259e+07	1	0	-0.0602679	-0.0621605	-0.0619736	-0.0745542	-0.638701
btg	crypto	2026	1	2026-01-31	0.567143	0.510169	0.473879	6.45776	2.22313	0.583829	5.98388	31	0	0.624374	3.47637	11.9286	2.39297	0.926619	0.998992	238.414	1.4114e+06	4.29253e+06	9.46606e+06	4.43975e+07	1.28975e+08	2	0	-0.118878	-0.126559	-0.0364055	-0.0528878	-0.692919
btg	crypto	2026	2	2026-02-28	0.499515	0.500061	0.451919	0.64757	0.519298	0.500033	0.195651	28	0	0.0851114	0.450367	1.62605	0.272605	0.273937	0.999039	95.6795	807.94	3176.34	9.02979e+06	1.0377e+07	1.29403e+07	0	0	-0.0198142	-0.0200132	-0.0444375	-0.0734146	-0.697668
btg	crypto	2026	3	2026-03-31	0.500031	0.484561	0.462386	0.589067	0.535968	0.550074	0.126681	31	0	0.0727041	0.404799	1.38901	0.278668	0.215054	0.999017	56.3933	604.898	2607.44	9.24839e+06	1.0717e+07	1.1778e+07	0	0	-0.0309958	-0.0314863	-0.0777825	-0.112989	-0.688296
btg	crypto	2026	4	2026-04-30	0.485022	0.505095	0.399746	0.588071	0.504484	0.510561	0.188325	30	0	0.0690863	0.378401	1.31989	0.265515	0.186363	0.99915	3.66616	381.324	2179.82	7.99675e+06	1.00944e+07	1.17662e+07	0	0	0.042376	0.0415027	0.109679	0.15631	-0.68081
busd	stablecoin	2019	9	2019-09-30	0.999908	1.00081	0.998402	1.00371	1.00051	1.00001	0.00531011	11	0	0.00329507	0.0104199	0.0629522	0.00662228	0.0051958	0.0051958	91888.7	921241	4.08015e+06	8.08228e+06	1.34977e+07	1.92735e+07	0	0
busd	stablecoin	2019	10	2019-10-31	1.00227	1.00062	0.998812	1.00227	1.00055	1.00055	0.00345786	31	0	0.000973436	0.00541986	0.0185975	0.00381203	0.00345003	0.00488243	137765	6.73702e+06	2.90147e+07	1.97547e+07	2.7404e+07	3.54264e+07	0	0	-0.000193737	-0.000193756
busd	stablecoin	2019	11	2019-11-30	1.00183	1.0012	0.99969	1.00183	1.00054	1.00034	0.00214231	30	0	0.000617266	0.0033809	0.0117928	0.00248101	0.0021384	0.00400735	3.35518e+06	8.76052e+06	1.75409e+07	2.16241e+07	2.60149e+07	3.24901e+07	0	0	0.000584725	0.000584554
busd	stablecoin	2019	12	2019-12-31	1.00087	0.999857	0.999608	1.00153	1.0004	1.00043	0.0019233	31	0	0.000572527	0.00318769	0.0109381	0.00226607	0.00192036	0.00408913	2.97763e+06	7.06742e+06	1.77373e+07	2.59916e+07	2.81685e+07	3.09102e+07	0	0	-0.00134221	-0.00134311
busd	stablecoin	2020	1	2020-01-31	1.00001	0.999934	0.999387	1.00125	1.00025	1.00019	0.00186319	31	0	0.000491318	0.00273554	0.00938661	0.00200675	0.00186087	0.00430891	1.6914e+06	6.31929e+07	2.06922e+08	2.6851e+07	3.52532e+07	4.95724e+07	0	0	7.65287e-05	7.65258e-05
busd	stablecoin	2020	2	2020-02-29	1.00005	0.999719	0.999494	1.00111	1.00029	1.00026	0.00161644	29	0	0.000527314	0.00283967	0.0100743	0.00191493	0.00139037	0.00420253	2.35175e+07	8.52252e+07	2.31639e+08	3.02802e+07	4.97884e+07	7.03971e+07	0	0	-0.000214979	-0.000215002
busd	stablecoin	2020	3	2020-03-31	0.999651	0.999658	0.996252	1.0026	0.999787	0.999851	0.00634757	31	0	0.00196258	0.0109272	0.037495	0.00712863	0.0044679	0.00743294	5.43193e+07	5.41773e+08	3.10023e+09	6.82528e+07	1.37582e+08	1.92422e+08	0	0	-6.04626e-05	-6.04644e-05
busd	stablecoin	2020	4	2020-04-30	1.00076	1.00002	0.999559	1.001	1.00017	1.00015	0.00144089	30	0	0.000568868	0.00311582	0.0108682	0.00210261	0.00125326	0.00413769	5.03384e+07	1.59945e+08	8.02633e+08	1.7585e+08	1.92809e+08	2.06845e+08	0	0	0.000365987	0.00036592
busd	stablecoin	2020	5	2020-05-31	1.00015	1.00027	0.998533	1.0005	1.00011	1.00019	0.00196746	31	0	0.000593888	0.00330663	0.0113462	0.0022139	0.00196647	0.00516052	5.52016e+07	1.58046e+08	1.06456e+09	1.65219e+08	1.79851e+08	1.93997e+08	0	0	0.000247287	0.000247256
busd	stablecoin	2020	6	2020-06-30	1.00034	1.00018	0.999852	1.00117	1.00028	1.00028	0.00132122	30	0	0.000348	0.00190608	0.00664854	0.00126187	0.0012909	0.00384573	4.51695e+07	8.35198e+07	2.37426e+08	1.47087e+08	1.66501e+08	1.78579e+08	0	0	-9.27658e-05	-9.27701e-05
busd	stablecoin	2020	7	2020-07-31	1.00058	1.00024	0.999614	1.00058	1.00023	1.00022	0.000963299	31	0	0.000297559	0.00165674	0.00568485	0.00113131	0.000962743	0.00408264	4.30087e+07	1.17702e+08	4.03013e+08	1.47057e+08	1.70396e+08	1.8554e+08	0	0	5.74613e-05	5.74596e-05
busd	stablecoin	2020	8	2020-08-31	1.00022	1.00022	0.99974	1.00048	1.00012	1.00009	0.000738468	31	0	0.000236522	0.0013169	0.00451875	0.000949963	0.000738115	0.0039575	1.30962e+08	2.26025e+08	3.6516e+08	1.52193e+08	1.84371e+08	2.13033e+08	0	0	-2.08338e-05	-2.0834e-05
busd	stablecoin	2020	9	2020-09-30	1.00023	1.00031	0.999951	1.00072	1.00021	1.00019	0.000767541	30	0	0.00025999	0.00142402	0.0049671	0.00103655	0.000766989	0.00374741	1.45242e+08	2.66429e+08	5.40948e+08	1.84268e+08	3.41931e+08	5.03508e+08	0	0	9.87142e-05	9.87093e-05
busd	stablecoin	2020	10	2020-10-31	1.00018	1.00018	0.999983	1.00053	1.00022	1.00022	0.000551939	31	0	0.000177135	0.000986247	0.00338416	0.000646016	0.000448144	0.00371549	9.25684e+07	2.17445e+08	4.02681e+08	5.18201e+08	7.03371e+08	8.09714e+08	0	0	-0.000133777	-0.000133786
busd	stablecoin	2020	11	2020-11-30	1.00006	1.00002	0.999706	1.00041	1.00014	1.00014	0.000708835	30	0	0.000251822	0.00137929	0.00481105	0.000867235	0.00065732	0.00399138	1.54925e+08	6.40061e+08	1.67168e+09	5.99552e+08	6.57076e+08	7.09751e+08	0	0	-0.000161693	-0.000161706
busd	stablecoin	2020	12	2020-12-31	1.00038	1.00045	0.999735	1.0006	1.00017	1.00023	0.00086293	31	0	0.000289353	0.00161105	0.00552807	0.000984264	0.000711028	0.00396273	3.80838e+08	8.25139e+08	1.8178e+09	6.47013e+08	7.43268e+08	9.84558e+08	0	0	0.000428835	0.000428743
busd	stablecoin	2021	1	2021-01-31	1.00003	1.00015	0.999427	1.00097	1.00019	1.00015	0.00154361	31	0	0.000494539	0.00275348	0.00944815	0.00186862	0.00154211	0.00426907	9.16118e+08	2.32876e+09	5.03567e+09	1.05849e+09	1.18247e+09	1.48847e+09	0	0	-0.000301524	-0.000301569
busd	stablecoin	2021	2	2021-02-28	1.00016	1.0008	0.999099	1.0008	1.00019	1.00022	0.0017011	28	0	0.000543249	0.00287461	0.0103788	0.00204075	0.0016016	0.00459629	2.05106e+09	3.59371e+09	7.60447e+09	1.40859e+09	1.81606e+09	2.37827e+09	0	0	0.000654338	0.000654124
busd	stablecoin	2021	3	2021-03-31	0.998908	1.00025	0.998908	1.00114	1.00008	1.00008	0.00222995	31	0	0.000660433	0.00367714	0.0126176	0.00261914	0.00156419	0.0047861	1.93394e+09	3.08497e+09	4.5659e+09	2.53241e+09	3.1927e+09	3.58787e+09	0	0	-0.000548257	-0.000548407
busd	stablecoin	2021	4	2021-04-30	1.00015	1.0007	0.999398	1.00127	1.00024	1.00015	0.00187325	30	0	0.000613965	0.00336282	0.0117298	0.0022016	0.00187087	0.00429865	2.31104e+09	5.3048e+09	9.50579e+09	3.53202e+09	5.74956e+09	7.44263e+09	0	0	0.000443685	0.000443587
busd	stablecoin	2021	5	2021-05-31	1.00026	1.0002	0.996165	1.0007	0.999952	1.00008	0.00453188	31	0	0.00113551	0.00632227	0.021694	0.00430518	0.00411192	0.00751897	3.5175e+09	7.58016e+09	1.75873e+10	7.471e+09	8.15411e+09	8.88167e+09	0	0	-0.000495673	-0.000495796
busd	stablecoin	2021	6	2021-06-30	0.999859	1.00051	0.998874	1.00051	0.999921	0.999938	0.00163783	30	0	0.000475085	0.00260215	0.00907648	0.0017011	0.00163337	0.00482036	2.38115e+09	3.87497e+09	6.70605e+09	8.71838e+09	9.58357e+09	1.01056e+10	0	0	0.000312677	0.000312628
busd	stablecoin	2021	7	2021-07-31	0.999872	1.00028	0.999356	1.00043	1.00006	1.00011	0.00107404	31	0	0.000328082	0.00182668	0.006268	0.00131002	0.000780186	0.00434052	1.54568e+09	2.76753e+09	6.83966e+09	1.0298e+10	1.11933e+10	1.2291e+10	0	0	-0.000229278	-0.000229304
busd	stablecoin	2021	8	2021-08-31	0.998935	1.00002	0.998935	1.00072	1.00001	1.00007	0.00178202	31	0	0.000652913	0.00363526	0.0124739	0.00261248	0.00156528	0.00475912	2.77232e+09	4.18664e+09	5.18393e+09	1.18924e+10	1.2128e+10	1.23266e+10	0	0	-0.000263834	-0.000263868
busd	stablecoin	2021	9	2021-09-30	1.00039	1.00018	0.999247	1.00045	0.999931	0.999895	0.00120403	30	0	0.000403258	0.00220874	0.00770424	0.00159975	0.00120348	0.00444828	3.16367e+09	5.30924e+09	1.28089e+10	1.23695e+10	1.28556e+10	1.36879e+10	0	0	0.000163047	0.000163034
busd	stablecoin	2021	10	2021-10-31	0.999762	1.00027	0.999736	1.00032	1.00008	1.00009	0.000584848	31	0	0.000168574	0.000938578	0.00322059	0.000697248	0.000552333	0.00396128	2.87436e+09	5.129e+09	9.79376e+09	1.27645e+10	1.3073e+10	1.36234e+10	0	0	8.87452e-05	8.87412e-05
busd	stablecoin	2021	11	2021-11-30	1.00004	0.99986	0.999614	1.00055	1.00003	1.00005	0.000939486	30	0	0.000262556	0.00143808	0.00501612	0.00112635	0.000837624	0.00408276	3.38819e+09	5.471e+09	8.43873e+09	1.26586e+10	1.32284e+10	1.42082e+10	0	0	-0.000410392	-0.000410476
busd	stablecoin	2021	12	2021-12-31	1.00021	0.999959	0.99975	1.00054	1.00004	1.00001	0.000784893	31	0	0.000207041	0.00115275	0.00395551	0.000799831	0.000784473	0.00394744	2.30924e+09	3.74369e+09	9.3539e+09	1.33593e+10	1.42033e+10	1.50624e+10	0	0	9.93547e-05	9.93498e-05
busd	stablecoin	2022	1	2022-01-31	1.00013	1.00008	0.999342	1.00043	1.00005	1.00006	0.00108527	31	0	0.000245458	0.00136665	0.00468947	0.00100071	0.000935645	0.00435377	1.74481e+09	3.20185e+09	5.51429e+09	1.40206e+10	1.43966e+10	1.53193e+10	0	0	0.000120828	0.000120821
busd	stablecoin	2022	2	2022-02-28	1.00011	1.00001	0.998611	1.00092	1.00003	1	0.00231376	28	0	0.000492794	0.00260762	0.00941483	0.00190874	0.00231162	0.0050827	1.5742e+09	2.91025e+09	5.4025e+09	1.55034e+10	1.75115e+10	1.85539e+10	0	0	-7.35483e-05	-7.3551e-05
busd	stablecoin	2022	3	2022-03-31	0.999916	0.999717	0.999481	1.00044	1.00001	1.00002	0.000957511	31	0	0.000265231	0.00147675	0.00506724	0.00102614	0.000957092	0.00421576	1.68231e+09	2.98643e+09	4.63617e+09	1.74463e+10	1.7825e+10	1.83345e+10	0	0	-0.000289929	-0.000289971
busd	stablecoin	2022	4	2022-04-30	0.999835	1.00001	0.999573	1.00022	0.99994	0.999958	0.000644902	30	0	0.000197988	0.00108443	0.00378256	0.000759578	0.000499249	0.00412366	1.14289e+09	2.96479e+09	4.7007e+09	1.72749e+10	1.76003e+10	1.79321e+10	0	0	0.000296219	0.000296175
busd	stablecoin	2022	5	2022-05-31	1.00018	1.00015	0.999207	1.00048	0.999949	0.999945	0.00127311	31	0	0.00031397	0.00174811	0.00599839	0.00126204	0.000976316	0.00448877	1.93263e+09	4.98218e+09	1.24536e+10	1.69287e+10	1.79217e+10	1.85638e+10	0	0	0.000133421	0.000133412
busd	stablecoin	2022	6	2022-06-30	0.999893	1.00091	0.998478	1.00091	0.999842	0.999854	0.00243338	30	0	0.000508256	0.00278383	0.00971021	0.00171661	0.00175313	0.00521477	1.54268e+09	3.60358e+09	8.51647e+09	1.71731e+10	1.76726e+10	1.8241e+10	0	0	0.000765332	0.000765039
busd	stablecoin	2022	7	2022-07-31	0.99951	1.00014	0.999152	1.00095	1.00004	1.00004	0.00179338	31	0	0.000555901	0.00309513	0.0106205	0.00237667	0.00179169	0.00454317	2.36595e+09	3.98273e+09	6.15411e+09	1.7721e+10	1.78765e+10	1.81237e+10	0	0	-0.000771908	-0.000772206
busd	stablecoin	2022	8	2022-08-31	0.99969	0.99997	0.99969	1.0008	1.00003	0.999993	0.00111106	31	0	0.000407642	0.00226965	0.00778799	0.00158124	0.00108563	0.00400738	2.00569e+09	4.07723e+09	8.39636e+09	1.7645e+10	1.84146e+10	1.93664e+10	0	0	-0.000168395	-0.000168409
busd	stablecoin	2022	9	2022-09-30	1.00008	0.999989	0.99987	1.0002	1.00002	1.00001	0.000331469	30	0	0.000132925	0.000728059	0.00253952	0.000557679	0.000287733	0.00382789	2.772e+09	6.49445e+09	1.10659e+10	1.942e+10	2.04143e+10	2.10819e+10	0	0	1.81186e-05	1.81184e-05
busd	stablecoin	2022	10	2022-10-31	1.00016	1.00009	0.999903	1.00031	1.00008	1.00008	0.000408737	31	0	0.000138112	0.000768977	0.00263863	0.000564889	0.00033247	0.003795	2.14167e+09	4.2197e+09	6.87657e+09	2.08838e+10	2.14506e+10	2.1881e+10	0	0	9.69393e-05	9.69346e-05
busd	stablecoin	2022	11	2022-11-30	1.00008	0.999938	0.999472	1.00017	0.999878	0.999897	0.000700657	30	0	0.00022966	0.0012579	0.00438765	0.000838965	0.000700535	0.00422417	2.12318e+09	6.38557e+09	1.66007e+10	2.16604e+10	2.27314e+10	2.34481e+10	0	0	-0.000147322	-0.000147333
busd	stablecoin	2022	12	2022-12-31	1.00017	0.999911	0.999617	1.00017	0.999914	0.999923	0.000556081	31	0	0.000140722	0.000783508	0.0026885	0.000514992	0.000555985	0.00407997	1.43798e+09	3.68109e+09	8.08872e+09	1.6559e+10	1.945e+10	2.21624e+10	0	0	-2.68544e-05	-2.68548e-05
busd	stablecoin	2023	1	2023-01-31	0.999999	0.99999	0.999732	1.00024	1	0.99999	0.000510325	31	0	0.00016017	0.00089179	0.00306005	0.000634873	0.000510201	0.00396547	1.59324e+09	5.78465e+09	1.0312e+10	1.54478e+10	1.62133e+10	1.67781e+10	0	0	7.8655e-05	7.86519e-05
busd	stablecoin	2023	2	2023-02-28	0.999998	0.999931	0.999527	1.00045	0.999964	0.999971	0.000918841	28	0	0.000204778	0.00108358	0.00391227	0.000814696	0.000918432	0.00416967	3.06747e+09	6.3491e+09	9.5576e+09	1.05286e+10	1.41512e+10	1.62795e+10	0	0	-5.8507e-05	-5.85087e-05
busd	stablecoin	2023	3	2023-03-31	0.999756	0.999996	0.999742	1.00386	1.00036	1.00005	0.00411532	31	0	0.000907455	0.0050525	0.0173369	0.00352993	0.00409951	0.00409951	1.42519e+09	4.06661e+09	7.67866e+09	7.55715e+09	8.33532e+09	1.01609e+10	0	0	6.40832e-05	6.40812e-05
busd	stablecoin	2023	4	2023-04-30	0.999807	1.00024	0.999807	1.00075	1.00013	1.00008	0.000940472	30	0	0.000223152	0.00122225	0.00426331	0.00073451	0.000930577	0.00403464	6.80628e+08	1.55085e+09	2.42748e+09	6.1986e+09	6.74846e+09	7.55599e+09	0	0	0.000249004	0.000248973
busd	stablecoin	2023	5	2023-05-31	0.999842	0.999915	0.999659	1.00172	1.00033	1.00016	0.00206575	31	0	0.000312674	0.00174089	0.00597363	0.00116828	0.0020622	0.00418207	3.78781e+08	8.20443e+08	1.39223e+09	5.19559e+09	5.60945e+09	6.15499e+09	0	0	-0.000329988	-0.000330043
busd	stablecoin	2023	6	2023-06-30	1.00019	1.00002	0.999397	1.00054	0.999911	0.999913	0.00113983	30	0	0.00028223	0.00154584	0.00539199	0.00103041	0.00113921	0.00444336	3.78801e+08	8.38973e+08	1.62358e+09	4.13304e+09	4.54636e+09	5.16602e+09	0	0	0.000108543	0.000108537
busd	stablecoin	2023	7	2023-07-31	0.999905	0.999818	0.999818	1.00042	0.999972	0.99995	0.000598414	31	0	0.000154701	0.000861337	0.00295555	0.000548937	0.000598165	0.00402375	2.75338e+08	6.93001e+08	1.69672e+09	3.66716e+09	3.9266e+09	4.13255e+09	0	0	-0.000205173	-0.000205194
busd	stablecoin	2023	8	2023-08-31	1.00008	0.999947	0.999599	1.00119	1.00003	0.999989	0.00158672	31	0	0.000441096	0.00245592	0.00842712	0.00144496	0.00139789	0.00424184	1.1938e+08	3.78156e+08	9.09014e+08	2.97345e+09	3.29255e+09	3.62294e+09	0	0	0.000128717	0.000128709
busd	stablecoin	2023	9	2023-09-30	1.00012	1.00002	0.999666	1.00056	1.00003	1.00002	0.00089204	30	0	0.000224625	0.00123032	0.00429145	0.000855058	0.000796669	0.00417534	1.20148e+08	2.41283e+08	3.4912e+08	2.25958e+09	2.51434e+09	2.8886e+09	0	0	6.9966e-05	6.99636e-05
busd	stablecoin	2023	10	2023-10-31	0.999889	1.00032	0.999881	1.00213	1.00038	1.00032	0.00224478	31	0	0.000483598	0.00269256	0.00923913	0.00207481	0.00185219	0.00396086	6.86974e+07	1.94698e+08	4.07506e+08	2.00782e+09	2.13237e+09	2.26027e+09	0	0	0.000307972	0.000307924
busd	stablecoin	2023	11	2023-11-30	1.00016	0.999868	0.99937	1.00063	1.00011	1.00017	0.00126012	30	0	0.000436938	0.00239321	0.00834768	0.00185883	0.00125933	0.00447016	9.99245e+07	2.2389e+08	4.02846e+08	1.66631e+09	1.82317e+09	1.99823e+09	0	0	-0.000456784	-0.000456888
busd	stablecoin	2023	12	2023-12-31	1.00003	1.00109	0.996921	1.00358	0.99978	0.999927	0.00665479	31	0	0.00122844	0.00683964	0.0234692	0.00383475	0.00663107	0.00690907	201050	8.90379e+07	4.90976e+08	1.0079e+09	1.26548e+09	1.658e+09	0	0	0.00121903	0.00121829
busd	stablecoin	2024	1	2024-01-31	1.00109	0.961742	0.961742	1.00109	0.998176	1.00109	0.039344	31	0	0.00723537	0.0402848	0.138231	0.0346494	0.0393013	0.0419529	37470.8	255986	1.38657e+06	9.56273e+07	4.4216e+08	1.01204e+09	0	0	-0.0393013	-0.0400944
busd	stablecoin	2024	2	2024-02-29	0.973665	0.998696	0.894506	0.999729	0.97699	0.981103	0.105224	29	0	0.0314562	0.169397	0.60097	0.121699	0.0993379	0.108931	16678.6	211252	1.23979e+06	7.5596e+07	8.60534e+07	9.68128e+07	0	0	0.0384238	0.037704
busd	stablecoin	2024	3	2024-03-31	0.998273	0.99784	0.996968	1.10776	1.00577	0.998351	0.110787	31	0	0.0263749	0.146849	0.503892	0.10028	0.100011	0.100011	9328.68	70306.1	258197	8.42553e+07	8.49989e+07	9.36181e+07	0	0	-0.000857114	-0.000857481
busd	stablecoin	2024	4	2024-04-30	0.999364	1.01262	0.896051	1.01262	0.984803	0.997746	0.116569	30	0	0.036023	0.197306	0.688218	0.137823	0.103379	0.191111	2467.72	35891.1	175688	6.31819e+07	6.99063e+07	8.44577e+07	0	0	0.0148114	0.0147028
busd	stablecoin	2024	5	2024-05-31	0.999939	0.980084	0.907587	1.10164	1.00474	0.99907	0.194055	31	0	0.0570806	0.317811	1.09052	0.233681	0.17615	0.180697	1086.4	24863.9	96152.6	6.39953e+07	7.08454e+07	7.76784e+07	0	0	-0.0321307	-0.0326582
busd	stablecoin	2024	6	2024-06-30	0.977571	0.996712	0.897708	1.01605	0.985402	0.996147	0.118343	30	0	0.0401008	0.219641	0.766125	0.131461	0.109244	0.189615	877.187	24732	87804.3	6.32987e+07	6.94822e+07	7.16433e+07	0	0	0.0169659	0.0168236
busd	stablecoin	2024	7	2024-07-31	0.996387	0.996735	0.987109	0.999378	0.994926	0.995725	0.0122696	31	0	0.00400904	0.0223214	0.0765926	0.0153348	0.0105517	0.108911	1562.83	29876	97988.9	6.86154e+07	6.91909e+07	7.02567e+07	0	0	2.33664e-05	2.33661e-05
busd	stablecoin	2024	8	2024-08-31	0.996735	0.998029	0.96784	1.00097	0.996935	0.998242	0.0331268	31	0	0.00861114	0.0479448	0.164516	0.0334384	0.0289898	0.126306	755.289	31264.2	176146	6.7276e+07	6.92984e+07	6.95786e+07	0	0	0.00129875	0.0012979
busd	stablecoin	2024	9	2024-09-30	0.999287	0.997269	0.996651	1.00023	0.99807	0.997826	0.00357681	30	0	0.00102415	0.00560949	0.0195663	0.00336164	0.00295768	0.100297	152.582	13346.4	81947.3	6.92787e+07	6.93773e+07	6.95273e+07	0	0	-0.0007614	-0.00076169
busd	stablecoin	2024	10	2024-10-31	0.997288	0.997191	0.996541	0.998995	0.997447	0.997366	0.00245453	31	0	0.000447393	0.00249098	0.00854742	0.00150786	0.002457	0.100397	81.8281	19963.2	68898	6.79875e+07	6.88782e+07	6.94416e+07	0	0	-7.84324e-05	-7.84355e-05
busd	stablecoin	2024	11	2024-11-30	0.997858	0.999012	0.881279	1.00835	0.985343	0.996842	0.127067	30	0	0.0336396	0.184251	0.642683	0.111589	0.126015	0.204447	3423.69	72422.7	621072	6.01239e+07	6.72235e+07	6.87928e+07	0	0	0.00182622	0.00182456
busd	stablecoin	2024	12	2024-12-31	0.999356	0.967812	0.856416	1.48871	0.991905	0.996988	0.632289	31	0	0.125131	0.696701	2.39063	0.490215	0.349897	0.349897	2169.24	62980	293584	5.84277e+07	6.76712e+07	1.01565e+08	1	0	-0.0312309	-0.0317289
busd	stablecoin	2025	1	2025-01-31	0.997095	0.998515	0.915992	1.00029	0.978975	0.986517	0.0842952	31	0	0.0284373	0.158332	0.543295	0.0990692	0.084271	0.384706	674.643	21464	113869	5.54089e+07	6.06936e+07	6.80253e+07	0	0	0.0317235	0.0312307
busd	stablecoin	2025	2	2025-02-28	0.997918	0.999023	0.910618	0.999987	0.9955	0.998688	0.0893688	28	0	0.0247522	0.130977	0.472891	0.0907946	0.0874818	0.388315	2850.08	49589.6	354274	5.50838e+07	6.02184e+07	6.04898e+07	0	0	0.000508808	0.000508678
busd	stablecoin	2025	3	2025-03-31	0.999038	0.998451	0.994936	0.999717	0.998551	0.998874	0.00478106	31	0	0.00149854	0.00834351	0.0286295	0.00591644	0.00457776	0.331677	855.659	33165.7	360265	5.76587e+07	5.93153e+07	6.0461e+07	0	0	-0.000572616	-0.00057278
busd	stablecoin	2025	4	2025-04-30	0.998961	0.998973	0.983158	1.00023	0.998844	0.999556	0.0170761	30	0	0.0041421	0.0226872	0.0791347	0.0170523	0.0170721	0.339589	318.936	23222.5	109867	5.68193e+07	5.77729e+07	5.79017e+07	0	0	0.000523029	0.000522893
busd	stablecoin	2025	5	2025-05-31	0.998384	0.998495	0.994111	0.999635	0.998272	0.998575	0.00552377	31	0	0.00138358	0.00770346	0.0264333	0.00458915	0.00552579	0.332231	1235.08	20066.4	112350	5.74523e+07	5.76928e+07	5.77716e+07	0	0	-0.000478338	-0.000478453
busd	stablecoin	2025	6	2025-06-30	0.998192	1.00034	0.995449	1.00144	0.999191	0.99938	0.00599202	30	0	0.00153102	0.00838574	0.0292501	0.00504925	0.00495009	0.331332	616.932	42806.3	1.01334e+06	5.75297e+07	5.77459e+07	5.7876e+07	0	0	0.00184659	0.00184489
busd	stablecoin	2025	7	2025-07-31	0.999045	0.995316	0.933135	1.03449	0.99649	0.997695	0.10135	31	0	0.0195362	0.108773	0.373239	0.0767339	0.0979718	0.37319	644.888	30746.6	148604	5.13469e+07	5.63473e+07	5.78023e+07	0	0	-0.00502067	-0.00503331
busd	stablecoin	2025	8	2025-08-31	0.98108	0.998365	0.936824	2.68465	1.05315	0.998365	1.74783	31	0	0.256695	1.42922	4.90415	0.929135	0.636609	0.636609	861.83	27365	139782	5.15499e+07	5.79511e+07	1.47726e+08	2	0	0.00306283	0.00305815
busd	stablecoin	2025	9	2025-09-30	0.997811	0.999359	0.965796	1.02096	0.996535	0.998392	0.055169	30	0	0.0128212	0.0702244	0.244948	0.0438827	0.0337666	0.640253	848.264	51259.5	669305	5.31441e+07	5.48356e+07	5.61799e+07	0	0	0.000995196	0.000994702
busd	stablecoin	2025	10	2025-10-31	1.00029	1.88821	0.972457	1.88821	1.02688	0.999406	0.915751	31	0	0.119452	0.66508	2.28212	0.0281514	0.0278269	0.637771	1281.96	87142.7	1.14136e+06	5.35106e+07	5.65054e+07	1.03901e+08	1	0	0.88942	0.63627
busd	stablecoin	2025	11	2025-11-30	0.999201	0.999697	0.958391	1.00017	0.994075	0.99858	0.0417844	30	0	0.117075	0.641247	2.23672	0.638422	0.0408427	0.643011	1912.66	58603	304383	5.27366e+07	5.47002e+07	5.50359e+07	0	0	-0.470558	-0.635931
busd	stablecoin	2025	12	2025-12-31	1.00774	0.999056	0.987141	1.04848	1.00012	0.998957	0.0613399	31	0	0.0137489	0.0765509	0.262673	0.054383	0.0563977	0.632302	508.778	20042.3	98716	5.43187e+07	5.5033e+07	5.7694e+07	0	0	-0.000640603	-0.000640808
busd	stablecoin	2026	1	2026-01-31	0.998774	0.999159	0.984866	1.00162	0.998621	0.999159	0.0167559	31	0	0.0040368	0.0224759	0.0771229	0.0161679	0.0167288	0.633149	715.286	166882	2.54167e+06	3.99926e+07	5.36887e+07	5.49982e+07	0	0	0.000102632	0.000102627
busd	stablecoin	2026	2	2026-02-28	0.999279	1.00038	0.997351	1.00038	0.998745	0.998883	0.00303122	28	0	0.00085469	0.0045226	0.0163288	0.00333097	0.00225719	0.628499	209.765	11654.4	57898	3.99203e+07	3.99761e+07	4.00416e+07	0	0	0.00122432	0.00122357
busd	stablecoin	2026	3	2026-03-31	0.99955	0.999076	0.993677	1.00048	0.998196	0.998314	0.00680386	31	0	0.00182268	0.0101483	0.0348223	0.00632212	0.00680059	0.629867	137.895	11727.8	53117.4	3.97732e+07	3.99541e+07	4.00455e+07	0	0	-0.00130628	-0.00130713
busd	stablecoin	2026	4	2026-04-30	0.998993	0.998259	0.889252	1.00322	0.993134	0.999199	0.113964	30	0	0.0327829	0.17956	0.626317	0.125851	0.110276	0.668764	89.686	11192	174786	3.55935e+07	3.97515e+07	4.0155e+07	0	0	-0.000816926	-0.00081726
comp	crypto	2020	6	2020-06-30	147.148	216.083	147.148	331.262	238.537	233.227	184.113	13	0	0.183931	0.637157	3.514	0.302238	0.360658	0.360658	2.85635e+06	1.30227e+07	4.01282e+07	1.47148e+09	2.38537e+09	3.31262e+09	1	0
comp	crypto	2020	7	2020-07-31	202.357	134.783	133.055	202.357	165.547	163.89	69.3017	31	0	0.0465561	0.259214	0.889454	0.229269	0.342473	0.598339	4.24826e+06	1.09048e+07	2.82304e+07	1.33055e+09	1.65547e+09	2.02357e+09	0	0	-0.376242	-0.471993	-1.82086	-2.05868
comp	crypto	2020	8	2020-08-31	138.33	244.801	126.537	244.801	175.747	179.828	118.265	31	0	0.0640876	0.356825	1.22439	0.177025	0.235601	0.618016	8.22778e+06	4.28361e+07	2.17482e+08	1.26537e+09	1.75747e+09	2.44801e+09	0	0	0.816257	0.596778	1.67247	3.37115
comp	crypto	2020	9	2020-09-30	259.426	133.302	127.306	259.426	161.648	155.836	132.119	30	0	0.0728216	0.39886	1.39126	0.361242	0.509276	0.615693	8.50829e+06	3.45199e+07	1.45259e+08	1.27306e+09	1.61648e+09	2.59426e+09	0	0	-0.455468	-0.607828	-1.52391	-1.68261
comp	crypto	2020	10	2020-10-31	128.989	90.6523	90.6523	128.989	107.777	106.91	38.3363	31	0	0.0496088	0.27621	0.947774	0.242764	0.297207	0.726343	5.57193e+06	1.62766e+07	3.65388e+07	9.06523e+08	1.07777e+09	1.28989e+09	0	0	-0.319949	-0.385587	-1.39599	-1.58832
comp	crypto	2020	11	2020-11-30	94.0021	111.922	87.1703	127.289	108.157	109.574	40.1189	30	0	0.0512688	0.280811	0.97949	0.193593	0.180333	0.736854	7.36673e+06	2.02991e+07	3.98107e+07	8.71703e+08	1.08157e+09	1.27289e+09	0	0	0.234633	0.210774	0.75059	1.08875
comp	crypto	2020	12	2020-12-31	105.265	150.493	105.265	176.62	143.879	144.822	71.3554	31	0	0.0698338	0.388818	1.33417	0.229106	0.264394	0.682231	9.46825e+06	3.40736e+07	1.38153e+08	1.05265e+09	1.43879e+09	1.7662e+09	0	0	0.344622	0.296113	0.761573	1.29247
comp	crypto	2021	1	2021-01-31	145.46	345.087	136.634	345.087	207.455	206.746	208.454	31	0	0.0949363	0.528583	1.81376	0.310474	0.204838	0.587535	2.22733e+07	5.65774e+07	1.83707e+08	1.36634e+09	2.07455e+09	3.45087e+09	0	0	1.29304	0.829879	1.57001	2.67294
comp	crypto	2021	2	2021-02-28	362.624	403.602	357.207	535.445	446.681	454.249	178.238	28	0	0.0734948	0.388898	1.40412	0.231832	0.290696	0.290696	5.36311e+07	1.29351e+08	2.94152e+08	3.57207e+09	4.46681e+09	5.35445e+09	0	0	0.169564	0.156631	0.402755	0.675622
comp	crypto	2021	3	2021-03-31	491.79	398.035	346.266	499.215	432.233	435.401	152.949	31	0	0.0552293	0.307504	1.05515	0.169746	0.306379	0.353312	2.68868e+07	5.96729e+07	1.90084e+08	3.46266e+09	4.32233e+09	4.99215e+09	0	0	-0.0137918	-0.0138878	-0.0451631	-0.0818156
comp	crypto	2021	4	2021-04-30	451.609	741.299	447.339	741.299	529.678	490.473	293.96	30	0	0.0740207	0.405428	1.41416	0.18704	0.184484	0.184484	6.91227e+07	1.69977e+08	5.54609e+08	4.47339e+09	5.29678e+09	7.41299e+09	0	0	0.862396	0.621864	1.53384	3.32477
comp	crypto	2021	5	2021-05-31	808.867	434.193	341.965	859.171	618.703	693.128	517.207	31	0	0.10639	0.592353	2.03257	0.484862	0.601983	0.601983	7.85921e+07	2.08006e+08	4.13264e+08	3.41965e+09	6.18703e+09	8.59171e+09	0	0	-0.414281	-0.534916	-0.903036	-1.10323
comp	crypto	2021	6	2021-06-30	426.417	333.076	222.204	450.405	317.405	310.193	228.201	30	0	0.0896116	0.490823	1.71203	0.39162	0.506657	0.741374	2.51325e+07	6.79991e+07	2.01294e+08	2.22204e+09	3.17405e+09	4.50405e+09	0	0	-0.232886	-0.265119	-0.540153	-0.676981
comp	crypto	2021	7	2021-07-31	333.489	407.792	333.489	496.597	401.641	397.863	163.108	31	0	0.060508	0.336895	1.156	0.197716	0.310079	0.611849	5.40838e+07	1.51877e+08	4.61327e+08	3.33489e+09	4.01641e+09	4.96597e+09	0	0	0.224323	0.202388	0.600746	1.02363
comp	crypto	2021	8	2021-08-31	410.579	442.209	397.806	504.973	451.181	459.333	107.167	31	0	0.0477084	0.265629	0.911467	0.158444	0.186496	0.536988	5.27127e+07	1.20296e+08	2.30769e+08	3.97806e+09	4.51181e+09	5.04973e+09	0	0	0.0843973	0.0810244	0.305028	0.511377
comp	crypto	2021	9	2021-09-30	479.104	312.32	297.343	510.614	395.648	397.631	213.271	30	0	0.0744712	0.407895	1.42277	0.32677	0.417676	0.653919	3.22816e+07	1.10775e+08	3.08727e+08	2.97343e+09	3.95648e+09	5.10614e+09	0	0	-0.293727	-0.347754	-0.852557	-1.06422
comp	crypto	2021	10	2021-10-31	325.503	344.635	301.251	344.635	316.462	314.019	43.3843	31	0	0.0410163	0.228369	0.783615	0.157484	0.110269	0.64937	4.97195e+07	1.01347e+08	2.65375e+08	3.01251e+09	3.16462e+09	3.44635e+09	0	0	0.103469	0.0984592	0.431141	0.6252
comp	crypto	2021	11	2021-11-30	363.403	279.646	261.597	383.972	322.608	323.202	122.375	30	0	0.048696	0.266719	0.930336	0.210454	0.318708	0.695524	3.70859e+07	8.09568e+07	2.7296e+08	2.61597e+09	3.22608e+09	3.83972e+09	0	0	-0.188573	-0.208961	-0.783451	-0.992909
comp	crypto	2021	12	2021-12-31	272.307	200.477	181.784	272.307	212.528	207.079	90.5238	31	0	0.0600642	0.334423	1.14752	0.270904	0.332433	0.78842	2.78533e+07	6.49954e+07	1.35224e+08	1.81784e+09	2.12528e+09	2.72307e+09	0	0	-0.283105	-0.332826	-0.995224	-1.22858
comp	crypto	2022	1	2022-01-31	209.077	121.752	118.248	223.581	169.259	183.285	105.333	31	0	0.0492048	0.27396	0.940056	0.262663	0.471116	0.862369	2.98426e+07	5.61777e+07	1.67165e+08	1.18248e+09	1.69259e+09	2.23581e+09	0	0	-0.392686	-0.49871	-1.82037	-1.89867
comp	crypto	2022	2	2022-02-28	126.788	120.183	106.697	148.615	125.154	124.226	41.9178	28	0	0.0538857	0.285136	1.02948	0.197444	0.282057	0.875814	1.35894e+07	3.13227e+07	5.822e+07	1.06697e+09	1.25154e+09	1.48615e+09	0	0	-0.0128928	-0.0129766	-0.0455102	-0.0657229
comp	crypto	2022	3	2022-03-31	125.62	148.78	98.8709	158.035	115.802	114.318	59.1639	31	0	0.0499609	0.27817	0.954501	0.160636	0.212936	0.884923	1.12828e+07	4.87036e+07	2.65496e+08	9.88709e+08	1.15802e+09	1.58035e+09	0	0	0.237948	0.213455	0.767354	1.32881
comp	crypto	2022	4	2022-04-30	157.823	103.998	103.998	172.207	137.729	136.471	68.2092	30	0	0.0669047	0.366452	1.27821	0.280518	0.396087	0.878955	1.59047e+07	5.58826e+07	1.53773e+08	1.03998e+09	1.37729e+09	1.72207e+09	0	0	-0.300993	-0.358094	-0.977192	-1.27655
comp	crypto	2022	5	2022-05-31	105.549	63.8224	55.5826	115.321	76.9173	69.0627	59.7382	31	0	0.0869847	0.48431	1.66184	0.414651	0.518018	0.935307	1.39792e+07	2.82763e+07	1.11187e+08	5.55826e+08	7.69173e+08	1.15321e+09	0	0	-0.386313	-0.488271	-1.00818	-1.17755
comp	crypto	2022	6	2022-06-30	58.7271	45.8799	28.6795	59.3761	46.1345	46.7163	30.6966	30	0	0.0846378	0.46358	1.617	0.358212	0.516986	0.96662	6.91283e+06	2.14242e+07	5.80262e+07	2.86795e+08	4.61345e+08	5.93761e+08	0	0	-0.281131	-0.330076	-0.712014	-0.921453
comp	crypto	2022	7	2022-07-31	47.6694	57.2039	46.0217	61.1457	52.9352	55.0499	15.1241	31	0	0.0582112	0.324106	1.11212	0.18589	0.198926	0.946435	1.31072e+07	2.81383e+07	6.03738e+07	4.60217e+08	5.29352e+08	6.11457e+08	0	0	0.246818	0.220594	0.680624	1.18669
comp	crypto	2022	8	2022-08-31	58.7164	46.395	44.2362	65.9094	55.9456	56.8465	21.6732	31	0	0.0513927	0.286142	0.981856	0.211317	0.328833	0.948513	9.58252e+06	2.07337e+07	5.74498e+07	4.42362e+08	5.59456e+08	6.59094e+08	0	0	-0.188954	-0.209431	-0.731911	-0.991074
comp	crypto	2022	9	2022-09-30	48.1451	60.9243	44.8128	63.5251	54.9425	54.5502	18.7123	30	0	0.0486999	0.26674	0.930411	0.167584	0.180533	0.947842	9.51214e+06	2.88818e+07	5.36945e+07	4.48128e+08	5.49425e+08	6.35251e+08	0	0	0.313165	0.27244	1.02137	1.6257
comp	crypto	2022	10	2022-10-31	60.8185	50.3272	49.1392	60.8185	54.377	54.5955	11.6792	31	0	0.022103	0.123064	0.422277	0.1101	0.192034	0.942806	4.52712e+06	1.66031e+07	4.74998e+07	4.91392e+08	5.4377e+08	6.08185e+08	0	0	-0.173938	-0.191085	-1.55273	-1.73556
comp	crypto	2022	11	2022-11-30	48.555	38.5716	34.1585	51.8124	40.9697	38.6695	17.6539	30	0	0.0678664	0.37172	1.29659	0.300339	0.340727	0.960243	3.53116e+06	1.39383e+07	4.74948e+07	3.41585e+08	4.09697e+08	5.18124e+08	0	0	-0.233585	-0.266032	-0.715678	-0.885772
comp	crypto	2022	12	2022-12-31	37.3755	31.1454	30.6285	39.5459	35.441	34.152	8.91735	31	0	0.0387631	0.215824	0.740567	0.191104	0.225494	0.964351	2.74334e+06	7.97939e+06	2.90849e+07	3.06285e+08	3.5441e+08	3.95459e+08	0	0	-0.192529	-0.213848	-0.990846	-1.11902
comp	crypto	2023	1	2023-01-31	31.5286	52.0299	31.1945	57.7445	44.7602	49.912	26.55	31	0	0.0621747	0.346174	1.18785	0.13274	0.107506	0.963692	5.48751e+06	1.72297e+07	9.14449e+07	3.11945e+08	4.47602e+08	5.77445e+08	0	0	0.670548	0.513152	1.48235	3.86583
comp	crypto	2023	2	2023-02-28	55.4108	48.9175	48.5429	57.7656	52.4215	51.9004	9.22267	28	0	0.048002	0.254003	0.917077	0.182532	0.153198	0.9435	5.65081e+06	1.71355e+07	6.04575e+07	4.85429e+08	5.24215e+08	5.77656e+08	0	0	-0.0598197	-0.0616836	-0.242846	-0.337932
comp	crypto	2023	3	2023-03-31	51.7025	43.1915	38.0535	51.7025	43.9703	43.6521	13.6491	31	0	0.0491421	0.273612	0.938858	0.20053	0.263992	0.955709	4.16913e+06	1.03022e+07	1.85098e+07	3.80535e+08	4.39703e+08	5.17025e+08	0	0	-0.117055	-0.124492	-0.454996	-0.620816
comp	crypto	2023	4	2023-04-30	43.6457	41.7741	38.7219	46.3588	42.5232	42.6867	7.63697	30	0	0.0292985	0.160475	0.559747	0.133294	0.164736	0.954931	4.00079e+06	7.36049e+06	1.43782e+07	3.87219e+08	4.25232e+08	4.63588e+08	0	0	-0.0328168	-0.0333673	-0.207929	-0.25033
comp	crypto	2023	5	2023-05-31	40.0204	35.8423	33.9205	40.7984	36.5222	35.8423	6.87788	31	0	0.022986	0.127981	0.439147	0.109875	0.168582	0.960519	1.76349e+06	3.89154e+06	9.71327e+06	3.39205e+08	3.65222e+08	4.07984e+08	0	0	-0.141997	-0.153148	-1.19665	-1.39384
comp	crypto	2023	6	2023-06-30	35.3785	55.8191	26.1572	55.8191	33.0114	31.2531	29.6619	30	0	0.0803039	0.439842	1.5342	0.230182	0.267181	0.969555	2.0363e+06	1.81542e+07	1.30591e+08	2.61572e+08	3.30114e+08	5.58191e+08	0	0	0.557354	0.442988	1.00715	1.92451	-0.379051
comp	crypto	2023	7	2023-07-31	52.3127	66.1245	52.3127	77.3452	66.6166	69.1731	25.0324	31	0	0.072706	0.40481	1.38905	0.193872	0.194187	0.939113	2.03147e+07	6.51691e+07	1.22196e+08	5.23127e+08	6.66166e+08	7.73452e+08	0	0	0.184622	0.169424	0.418527	0.873895	-0.220573
comp	crypto	2023	8	2023-08-31	65.5756	41.098	40.1707	65.5756	49.4759	46.6187	25.4049	31	0	0.0403271	0.224532	0.770449	0.223063	0.387414	0.953245	4.60537e+06	2.88149e+07	1.03837e+08	4.01707e+08	4.94759e+08	6.55756e+08	0	0	-0.378476	-0.475581	-2.1181	-2.13205	-0.468006
comp	crypto	2023	9	2023-09-30	40.024	46.7582	35.7871	49.2796	40.3777	39.9472	13.4926	30	0	0.0437354	0.239549	0.835564	0.108566	0.114859	0.958347	3.67791e+06	1.56466e+07	7.30783e+07	3.57871e+08	4.03777e+08	4.92796e+08	0	0	0.137726	0.129032	0.538645	1.18851	-0.307682
comp	crypto	2023	10	2023-10-31	48.0038	45.7075	39.8418	48.0038	43.4058	43.6263	8.16202	31	0	0.0256796	0.142978	0.490608	0.100358	0.170028	0.953628	7.01225e+06	1.84723e+07	3.76903e+07	3.98418e+08	4.34058e+08	4.80038e+08	0	0	-0.0224723	-0.0227287	-0.158967	-0.226477	-0.21303
comp	crypto	2023	11	2023-11-30	48.0105	50.5702	46.8864	57.8519	51.5788	51.3797	10.9655	30	0	0.0380457	0.208385	0.726863	0.135795	0.178007	0.945428	1.61769e+07	3.84271e+07	7.33343e+07	4.68864e+08	5.15788e+08	5.78519e+08	0	0	0.106389	0.101102	0.485167	0.744515	-0.242855
comp	crypto	2023	12	2023-12-31	51.3384	57.3196	49.7021	63.6711	54.1141	52.4959	13.969	31	0	0.0354898	0.197599	0.678032	0.133917	0.10777	0.942151	2.08041e+07	3.64243e+07	1.06935e+08	4.97021e+08	5.41141e+08	6.36711e+08	0	0	0.133464	0.125279	0.634004	0.935493	-0.287193
comp	crypto	2024	1	2024-01-31	61.2293	54.1567	47.9232	61.2293	54.4876	54.4165	13.3061	31	0	0.0451515	0.251393	0.862619	0.167983	0.217316	0.944222	1.66599e+07	3.00274e+07	5.05912e+07	4.79232e+08	5.44876e+08	6.12293e+08	0	0	-0.0551796	-0.0567604	-0.225784	-0.337895	-0.480805
comp	crypto	2024	2	2024-02-29	53.4278	91.0893	52.2352	94.2341	61.5698	57.7629	41.999	29	0	0.0405756	0.218506	0.775195	0.0728252	0.0689698	0.939203	1.31525e+07	3.30196e+07	1.20537e+08	5.22352e+08	6.15698e+08	9.42341e+08	0	0	0.681958	0.519958	2.37961	7.13981	-0.408313
comp	crypto	2024	3	2024-03-31	94.8852	79.2402	66.1767	94.8852	81.9865	79.8929	28.7085	31	0	0.0549938	0.306193	1.05066	0.232704	0.302561	0.922976	1.77674e+07	5.23744e+07	1.10181e+08	6.61767e+08	8.19865e+08	9.48852e+08	0	0	-0.130082	-0.139356	-0.455127	-0.598857	-0.434345
comp	crypto	2024	4	2024-04-30	75.7866	53.2053	51.3244	75.9506	61.9112	58.7932	24.6262	30	0	0.051881	0.284164	0.991184	0.258002	0.324239	0.940263	1.16058e+07	2.53541e+07	7.75545e+07	5.13244e+08	6.19112e+08	7.59506e+08	0	0	-0.328557	-0.398326	-1.40175	-1.54389	-0.610052
comp	crypto	2024	5	2024-05-31	55.4614	59.1396	52.3933	63.9257	58.0066	57.8866	11.5325	31	0	0.0337037	0.187654	0.643908	0.110682	0.120348	0.939019	9.71457e+06	1.86975e+07	2.66974e+07	5.23933e+08	5.80066e+08	6.39257e+08	0	0	0.111535	0.105742	0.563494	0.955366	-0.522269
comp	crypto	2024	6	2024-06-30	58.564	49.6643	47.6557	61.2627	52.5065	51.757	13.6069	30	0	0.0299159	0.163856	0.571543	0.137365	0.222108	0.944533	8.92925e+06	1.62549e+07	3.93177e+07	4.76557e+08	5.25065e+08	6.12627e+08	0	0	-0.160218	-0.174613	-1.06565	-1.27116	-0.505316
comp	crypto	2024	7	2024-07-31	49.4342	52.7174	44.818	52.7174	49.4875	49.7077	7.89934	31	0	0.0344933	0.192051	0.658994	0.13269	0.0933812	0.947836	5.70226e+06	1.67222e+07	6.21072e+07	4.4818e+08	4.94875e+08	5.27174e+08	0	0	0.0614732	0.0596577	0.310635	0.449604	-0.531821
comp	crypto	2024	8	2024-08-31	53.526	45.2053	37.3761	54.4763	44.9963	44.3729	17.1002	31	0	0.0518674	0.288786	0.990926	0.223748	0.301721	0.956498	8.4905e+06	1.81521e+07	6.46412e+07	3.73761e+08	4.49963e+08	5.44763e+08	0	0	-0.142497	-0.153731	-0.532336	-0.687071	-0.572763
comp	crypto	2024	9	2024-09-30	42.552	46.0623	40.9753	49.7972	44.8084	44.4529	8.82189	30	0	0.0325923	0.178515	0.622675	0.126618	0.0922595	0.952308	6.39373e+06	1.16565e+07	1.91665e+07	4.09753e+08	4.48084e+08	4.97972e+08	0	0	0.0189577	0.0187802	0.105202	0.148322	-0.518517
comp	crypto	2024	10	2024-10-31	42.6144	43.0487	40.8546	47.0799	44.0896	44.2867	6.22526	31	0	0.0270996	0.150884	0.517738	0.125545	0.132228	0.952449	2.94877e+06	5.28025e+06	1.12285e+07	4.08546e+08	4.40896e+08	4.70799e+08	0	0	-0.0654246	-0.067663	-0.448442	-0.538955	-0.549806
comp	crypto	2024	11	2024-11-30	42.3423	71.9541	40.6367	73.2357	54.0872	51.7183	32.599	30	0	0.0476472	0.260975	0.910299	0.112456	0.145506	0.952702	2.7877e+06	1.37534e+07	4.39593e+07	4.06367e+08	5.40872e+08	7.32357e+08	0	0	0.671461	0.513698	1.96838	4.56799	-0.40958
comp	crypto	2024	12	2024-12-31	72.6942	73.1515	72.6942	123.041	94.1891	88.2324	50.3472	31	0	0.0895886	0.498808	1.71159	0.292388	0.405473	0.91539	4.49045e+06	4.00972e+07	2.91608e+08	7.26942e+08	9.41891e+08	1.23041e+09	0	0	0.0166405	0.0165035	0.0330859	0.0564439	-0.337914
comp	crypto	2025	1	2025-01-31	77.7836	69.8766	67.1698	89.9327	77.5614	77.4252	22.7629	31	0	0.0513257	0.28577	0.980577	0.190835	0.25311	0.92182	5.69653e+06	1.31981e+07	3.5044e+07	6.71698e+08	7.75614e+08	8.99327e+08	0	0	-0.0447688	-0.0458019	-0.160276	-0.240008	-0.213704
comp	crypto	2025	2	2025-02-28	64.169	50.8712	48.4421	64.169	54.1036	54.6288	15.7269	28	0	0.0521513	0.275959	0.996349	0.24037	0.245085	0.943618	5.7678e+06	1.03191e+07	3.12898e+07	4.84421e+08	5.41036e+08	6.4169e+08	0	0	-0.271985	-0.317433	-1.15029	-1.3206	-0.315137
comp	crypto	2025	3	2025-03-31	50.1786	39.6033	38.5831	54.2867	44.204	43.2498	15.7036	31	0	0.0495104	0.275662	0.945896	0.237509	0.289272	0.955093	5.00028e+06	1.11952e+07	1.89238e+07	3.85831e+08	4.4204e+08	5.42867e+08	0	0	-0.221498	-0.250384	-0.908299	-1.05421	-0.451175
comp	crypto	2025	4	2025-04-30	44.3875	40.6363	36.8473	46.72	41.5119	40.5924	9.8727	30	0	0.0450771	0.246897	0.861196	0.164385	0.211316	0.957113	5.5006e+06	3.13504e+07	3.26152e+08	3.68473e+08	4.15119e+08	4.672e+08	0	0	0.0260819	0.0257476	0.104285	0.15663	-0.383892
comp	crypto	2025	5	2025-05-31	40.3012	40.6076	38.3724	48.8636	43.0906	42.8664	10.4912	31	0	0.0412895	0.22989	0.788835	0.155291	0.180446	0.955338	5.41537e+06	1.73867e+07	3.15142e+07	3.83724e+08	4.30906e+08	4.88636e+08	0	0	-0.000706143	-0.000706393	-0.00307274	-0.00454884	-0.247527
comp	crypto	2025	6	2025-06-30	40.7949	44.4482	40.7949	60.3742	48.4377	46.4146	19.5793	30	0	0.0560468	0.306981	1.07077	0.184857	0.263788	0.952518	8.77483e+06	3.9448e+07	2.24639e+08	4.07949e+08	4.84377e+08	6.03742e+08	0	0	0.0945801	0.0903709	0.294386	0.488868	-0.0185974
comp	crypto	2025	7	2025-07-31	41.5651	45.1422	40.6942	53.9234	47.2683	47.93	13.2292	31	0	0.0387785	0.215909	0.740862	0.136594	0.162845	0.952636	9.77136e+06	2.78736e+07	1.06103e+08	4.06942e+08	4.72683e+08	5.39234e+08	0	0	0.0156134	0.0154927	0.0717556	0.113422	-0.134282
comp	crypto	2025	8	2025-08-31	44.0256	42.5694	42.5694	55.397	47.2031	46.5659	12.8276	31	0	0.0461987	0.257223	0.882624	0.178084	0.231558	0.950453	4.74693e+06	1.65902e+07	8.03705e+07	4.25694e+08	4.72031e+08	5.5397e+08	0	0	-0.0569934	-0.058682	-0.228137	-0.329519	-0.0500289
comp	crypto	2025	9	2025-09-30	42.0862	41.4943	39.6255	46.9581	43.319	43.3053	7.3326	30	0	0.0246183	0.13484	0.470332	0.105796	0.156152	0.953879	3.6654e+06	1.0703e+07	3.47752e+07	3.96255e+08	4.3319e+08	4.69581e+08	0	0	-0.025256	-0.0255804	-0.189709	-0.241789	-0.212604
comp	crypto	2025	10	2025-10-31	43.0258	34.9258	30.1143	43.9863	37.9205	36.986	13.872	31	0	0.0693606	0.386183	1.32513	0.350509	0.31537	0.96495	3.20958e+06	1.29775e+07	4.48312e+07	3.01143e+08	3.79205e+08	4.39863e+08	0	0	-0.158298	-0.172329	-0.446237	-0.491655	-0.185948
comp	crypto	2025	11	2025-11-30	35.5945	34.9376	28.6221	35.6464	32.2285	32.0756	7.02426	30	0	0.0445239	0.243867	0.850627	0.157873	0.197054	0.966686	2.87987e+06	2.10462e+07	1.31517e+08	2.86221e+08	3.22285e+08	3.56464e+08	0	0	0.000336808	0.000336752	0.00138088	0.00213305	-0.0526227
comp	crypto	2025	12	2025-12-31	34.3196	24.7961	23.9063	35.5898	28.3701	27.0399	11.6835	31	0	0.0320738	0.178579	0.612769	0.165193	0.328282	0.972175	2.9289e+06	1.8744e+07	1.24734e+08	2.39063e+08	2.83701e+08	3.55898e+08	0	0	-0.290275	-0.342878	-1.92003	-2.07562	-0.10055
comp	crypto	2026	1	2026-01-31	25.3142	19.6781	19.6781	27.59	25.3184	26.0704	7.91191	31	0	0.0296739	0.165217	0.566918	0.153813	0.286768	0.977096	2.03509e+06	5.23111e+06	1.07409e+07	1.96781e+08	2.53184e+08	2.759e+08	0	0	-0.206404	-0.231181	-1.39926	-1.503	-0.353108
comp	crypto	2026	2	2026-02-28	19.1439	18.1476	15.8699	21.2678	18.2861	18.0961	5.39796	28	0	0.0684387	0.362144	1.30752	0.207415	0.198796	0.981529	1.96699e+06	1.19502e+07	9.76127e+07	1.58699e+08	1.82861e+08	2.12678e+08	0	0	-0.0777722	-0.080963	-0.223566	-0.390343	-0.351484
comp	crypto	2026	3	2026-03-31	17.6239	17.6302	16.53	19.6166	18.2517	18.325	3.08661	31	0	0.0297548	0.165668	0.568464	0.0983365	0.114697	0.980761	993280	4.50132e+06	5.64472e+07	1.653e+08	1.82517e+08	1.96166e+08	0	0	-0.0285106	-0.0289249	-0.174596	-0.294142	-0.320168
comp	crypto	2026	4	2026-04-30	16.7702	23.6069	16.5793	25.9947	21.2307	22.0971	9.41539	30	0	0.0430987	0.236061	0.8234	0.159781	0.163549	0.980703	1.29078e+06	1.02263e+07	6.52237e+07	1.65793e+08	2.12307e+08	2.59947e+08	0	0	0.339001	0.291924	1.23664	1.82703	-0.214823
cro	crypto	2019	3	2019-03-31	0.0697061	0.0439995	0.0439995	0.0697061	0.055136	0.0526876	0.0257066	12	0	0.0651135	0.215957	1.24399	0.227141	0.368786	0.368786	464.953	178615	572233	4.39995e+09	5.5136e+09	6.97061e+09	0	0
cro	crypto	2019	4	2019-04-30	0.0430872	0.0723322	0.0430872	0.0863224	0.0697807	0.0721401	0.0432352	30	0	0.0820272	0.449282	1.56713	0.205357	0.194501	0.381874	102180	361133	1.54005e+06	4.30872e+09	6.97807e+09	8.63224e+09	0	0	0.643932	0.497091	1.10641	2.42061
cro	crypto	2019	5	2019-05-31	0.0718949	0.07218	0.0627593	0.0749148	0.0682258	0.0683344	0.0121555	31	0	0.0437738	0.243722	0.836298	0.157228	0.162258	0.272967	90810.6	223846	468039	6.27593e+09	6.82258e+09	7.49148e+09	0	0	-0.00210447	-0.00210669	-0.00864379	-0.0133989
cro	crypto	2019	6	2019-06-30	0.0729176	0.0632015	0.0564689	0.0782559	0.0657116	0.064837	0.0217871	30	0	0.0744518	0.407789	1.4224	0.280714	0.278408	0.345838	74582	352645	1.92929e+06	5.64689e+09	6.57116e+09	7.82559e+09	0	0	-0.124391	-0.132836	-0.325746	-0.473207
cro	crypto	2019	7	2019-07-31	0.0591381	0.0579551	0.0513456	0.101444	0.0670624	0.06226	0.0500982	31	0	0.0981016	0.546207	1.87423	0.380429	0.493852	0.493852	99957	4.25963e+06	4.23278e+07	5.13456e+09	6.70624e+09	1.01444e+10	0	0	-0.0830094	-0.086658	-0.158654	-0.22779
cro	crypto	2019	8	2019-08-31	0.0566173	0.0388119	0.0388119	0.0566173	0.0465213	0.0455932	0.0178054	31	0	0.0302078	0.16819	0.577119	0.15537	0.314486	0.617405	317810	1.4882e+06	8.76913e+06	3.88119e+09	4.65213e+09	5.66173e+09	0	0	-0.330311	-0.400943	-2.38387	-2.58057
cro	crypto	2019	9	2019-09-30	0.0393637	0.0355498	0.0332788	0.0414056	0.0381844	0.0386378	0.00812678	30	0	0.0462797	0.253484	0.884172	0.201937	0.196273	0.671948	85995.8	666550	2.15467e+06	3.32788e+09	3.81844e+09	4140555786	0	0	-0.084048	-0.0877913	-0.346339	-0.434746
cro	crypto	2019	10	2019-10-31	0.0341509	0.0371198	0.0308142	0.0371198	0.0346304	0.0345712	0.00630559	31	0	0.0351538	0.195728	0.671612	0.119711	0.154174	0.696243	41339	396779	865732	3.08142e+09	3.46304e+09	3.71198e+09	0	0	0.0441631	0.0432157	0.220795	0.361
cro	crypto	2019	11	2019-11-30	0.0386171	0.0273412	0.0272685	0.0386171	0.0335836	0.0351052	0.0113486	30	0	0.0330323	0.180925	0.631081	0.158733	0.293875	0.731196	82071	419134	2.16871e+06	2.72685e+09	3.35836e+09	3.86171e+09	0	0	-0.263435	-0.305757	-1.68996	-1.92624
cro	crypto	2019	12	2019-12-31	0.0266919	0.0333134	0.0260271	0.0358142	0.0313397	0.0304963	0.00978715	31	0	0.0306102	0.170431	0.584808	0.0789923	0.0698267	0.743433	39676.2	324372	1.29835e+06	2.60271e+09	3.13397e+09	3.58142e+09	0	0	0.218435	0.197567	1.15922	2.50109
cro	crypto	2020	1	2020-01-31	0.0335828	0.053661	0.0324582	0.053661	0.0435546	0.0459816	0.0212028	31	0	0.0296666	0.165177	0.56678	0.0717238	0.0509221	0.680037	31241	189217	1.18931e+06	3245823311	4.35546e+09	5.3661e+09	0	0	0.610791	0.476725	2.88615	6.64668
cro	crypto	2020	2	2020-02-29	0.0530034	0.0524963	0.0524963	0.067431	0.0590046	0.05936	0.0149347	29	0	0.0398352	0.214519	0.76105	0.163718	0.221481	0.482508	202347	8.02099e+06	2.25664e+07	5.24963e+09	5.90046e+09	6.7431e+09	0	0	-0.021705	-0.021944	-0.102294	-0.134035
cro	crypto	2020	3	2020-03-31	0.0529075	0.0490197	0.0307517	0.0582722	0.0444773	0.0438283	0.0275204	31	0	0.106989	0.595688	2.04402	0.507171	0.472274	0.696859	1.10369e+06	7.96835e+06	1.31118e+07	3.07517e+09	4.44773e+09	5.82722e+09	0	0	-0.0662249	-0.0685197	-0.115026	-0.135102
cro	crypto	2020	4	2020-04-30	0.0492633	0.0575541	0.0476837	0.0618944	0.0515969	0.0506307	0.0142106	30	0	0.0370719	0.203051	0.708258	0.128483	0.110582	0.529949	828992	3.3378e+06	1.04619e+07	4.76837e+09	5.15969e+09	6.18944e+09	0	0	0.174102	0.160503	0.790458	1.24922
cro	crypto	2020	5	2020-05-31	0.0573608	0.0844494	0.0573608	0.0847195	0.0694814	0.0668613	0.0273587	31	0	0.0270453	0.150582	0.5167	0.0766315	0.0730302	0.434556	2.04276e+06	8.49795e+06	1.83864e+07	5.73608e+09	6.94814e+09	8.47195e+09	0	0	0.467303	0.383426	2.5463	5.0035
cro	crypto	2020	6	2020-06-30	0.0947082	0.125262	0.0901994	0.126973	0.111924	0.113971	0.0367734	30	0	0.042959	0.235296	0.82073	0.136292	0.119921	0.119921	1.60722e+07	3.39317e+07	5.13021e+07	9.01994e+09	1.11924e+10	1.26973e+10	0	0	0.483274	0.394252	1.67556	2.89271
cro	crypto	2020	7	2020-07-31	0.126527	0.1653	0.123219	0.165305	0.144411	0.143304	0.0420854	31	0	0.0212518	0.118325	0.406016	0.0563365	0.0342425	0.0342425	3.28819e+07	5.14387e+07	7.71337e+07	1.23219e+10	1.44411e+10	1.65305e+10	0	0	0.319641	0.27736	2.34405	4.92327
cro	crypto	2020	8	2020-08-31	0.173781	0.179104	0.156432	0.179104	0.167672	0.16799	0.0226728	31	0	0.0245538	0.13671	0.4691	0.0968466	0.0998348	0.0998348	4.32019e+07	5.54681e+07	1.9205e+08	1.56432e+10	1.67672e+10	1.79104e+10	0	0	0.0835088	0.0802047	0.586678	0.828162
cro	crypto	2020	9	2020-09-30	0.182664	0.152312	0.147617	0.182664	0.158287	0.154394	0.0350466	30	0	0.0339184	0.185779	0.648011	0.156964	0.191864	0.191864	3.31787e+07	4.47696e+07	5.9868e+07	1.47617e+10	1.58287e+10	1.82664e+10	0	0	-0.149594	-0.162041	-0.872226	-1.03234
cro	crypto	2020	10	2020-10-31	0.149484	0.0854344	0.0847327	0.15479	0.125287	0.136329	0.0700571	31	0	0.0377026	0.209919	0.720308	0.222058	0.452595	0.536128	2.36615e+07	3.59819e+07	4.69562e+07	8.47327e+09	1.25287e+10	1.5479e+10	0	0	-0.439081	-0.578179	-2.75429	-2.60373
cro	crypto	2020	11	2020-11-30	0.0851763	0.0701181	0.0637927	0.0851763	0.0721301	0.0712509	0.0213836	30	0	0.0598215	0.327656	1.14289	0.253438	0.251051	0.650765	2.33921e+07	3.28836e+07	5.17661e+07	6.37927e+09	7.21301e+09	8.51763e+09	0	0	-0.179275	-0.197568	-0.602974	-0.77955
cro	crypto	2020	12	2020-12-31	0.0656229	0.0586443	0.0556302	0.0667221	0.0614428	0.0605365	0.0110918	31	0	0.0356631	0.198564	0.681343	0.175631	0.166239	0.695451	2.36963e+07	3.31944e+07	5.11803e+07	5.56302e+09	6.14428e+09	6.67221e+09	0	0	-0.163636	-0.178692	-0.899921	-1.01742
cro	crypto	2021	1	2021-01-31	0.0596467	0.0622206	0.0596467	0.0880062	0.0722478	0.0719082	0.0283594	31	0	0.0681653	0.379528	1.3023	0.275768	0.292997	0.673462	2.96874e+07	4.76558e+07	1.15711e+08	5.96467e+09	7.22478e+09	8.80062e+09	0	0	0.0609844	0.0591972	0.155976	0.214663
cro	crypto	2021	2	2021-02-28	0.0610151	0.135258	0.0610151	0.222571	0.10592	0.0888575	0.161556	28	0	0.128979	0.682493	2.46414	0.380789	0.392291	0.665971	3.58052e+07	2.01247e+08	1.64488e+09	6.10151e+09	1.0592e+10	2.22571e+10	1	0	1.17385	0.776499	1.13774	2.03918
cro	crypto	2021	3	2021-03-31	0.148943	0.208154	0.148943	0.23956	0.188596	0.193134	0.0906172	31	0	0.0539388	0.300318	1.0305	0.160784	0.175206	0.330807	1.03335e+08	1.89116e+08	5.07724e+08	1.48943e+10	1.88596e+10	2.3956e+10	0	0	0.53894	0.431094	1.43546	2.6812
cro	crypto	2021	4	2021-04-30	0.210132	0.197525	0.167283	0.24496	0.203935	0.205673	0.0776777	30	0	0.0549013	0.300707	1.04889	0.223594	0.317103	0.317103	5.29643e+07	1.54321e+08	3.67091e+08	1.67283e+10	2.03935e+10	2.4496e+10	0	0	-0.0510625	-0.0524123	-0.174297	-0.234408
cro	crypto	2021	5	2021-05-31	0.19348	0.125043	0.0962672	0.19348	0.148793	0.153191	0.0972128	31	0	0.0878358	0.489049	1.6781	0.383252	0.502444	0.607009	3.10775e+07	5.48259e+07	9.20752e+07	9.62672e+09	1.48793e+10	1.9348e+10	0	0	-0.366955	-0.457214	-0.934903	-1.19298
cro	crypto	2021	6	2021-06-30	0.1231	0.11459	0.0885499	0.133004	0.112155	0.114311	0.0444537	30	0	0.0574366	0.314593	1.09732	0.235046	0.334229	0.638513	1.31558e+07	1.94916e+07	3.21078e+07	8.85499e+09	1.12155e+10	1.33004e+10	0	0	-0.0835906	-0.0872921	-0.277476	-0.371383
cro	crypto	2021	7	2021-07-31	0.112465	0.129993	0.101504	0.130605	0.117238	0.116612	0.029101	31	0	0.0412452	0.229644	0.787989	0.150114	0.222817	0.58563	7.68821e+06	2.22793e+07	1.06883e+08	1.01504e+10	1.17238e+10	1.30605e+10	0	0	0.134419	0.126121	0.549203	0.840168
cro	crypto	2021	8	2021-08-31	0.123852	0.154076	0.119342	0.160009	0.145235	0.147827	0.0406667	31	0	0.0386928	0.215432	0.739225	0.131513	0.0721555	0.512811	1.09666e+07	1.83174e+07	3.052e+07	1.19342e+10	1.45235e+10	1.60009e+10	0	0	0.18526	0.169962	0.788934	1.29235
cro	crypto	2021	9	2021-09-30	0.160976	0.158232	0.146599	0.203713	0.171334	0.169443	0.0571147	30	0	0.0629344	0.344706	1.20236	0.271986	0.280368	0.401541	1.2515e+07	2.84572e+07	8.00567e+07	1.46599e+10	1.71334e+10	2.03713e+10	0	0	0.0269745	0.0266171	0.0772168	0.0978619
cro	crypto	2021	10	2021-10-31	0.171148	0.211256	0.171148	0.223654	0.190234	0.18744	0.0525058	31	0	0.0369054	0.205481	0.705077	0.10959	0.0801151	0.301322	1.45171e+07	2.88218e+07	9.59176e+07	1.71148e+10	1.90234e+10	2.23654e+10	0	0	0.335101	0.289007	1.40649	2.63716
cro	crypto	2021	11	2021-11-30	0.213345	0.690321	0.213345	0.896414	0.512916	0.441079	0.683069	30	0	0.110959	0.607747	2.11987	0.273964	0.229908	0.229908	3.91841e+07	6.7834e+08	1.80378e+09	2.13345e+10	5.12916e+10	8.96414e+10	0	0	2.26771	1.18409	1.94833	4.32206
cro	crypto	2021	12	2021-12-31	0.718301	0.55954	0.49941	0.718301	0.5799	0.567554	0.218891	31	0	0.0508846	0.283314	0.972149	0.226944	0.304735	0.442881	6.77963e+07	1.9139e+08	5.09235e+08	4.9941e+10	5.799e+10	7.18301e+10	0	0	-0.18945	-0.210042	-0.741378	-0.925525
cro	crypto	2022	1	2022-01-31	0.582612	0.428748	0.337279	0.587773	0.452355	0.445484	0.250493	31	0	0.0544883	0.303378	1.041	0.25484	0.426174	0.623746	4.01473e+07	7.72628e+07	1.36193e+08	3.37279e+10	4.52355e+10	5.87773e+10	0	0	-0.23375	-0.266246	-0.877606	-1.04476
cro	crypto	2022	2	2022-02-28	0.436903	0.438366	0.387471	0.51527	0.445411	0.436577	0.127798	28	0	0.0533976	0.282554	1.02016	0.198051	0.248023	0.567754	3.5535e+07	7.01126e+07	1.40952e+08	3.87471e+10	4.45411e+10	5.1527e+10	0	0	0.0224342	0.0221863	0.0785207	0.112023
cro	crypto	2022	3	2022-03-31	0.438575	0.460605	0.376858	0.485089	0.420377	0.4086	0.108231	31	0	0.0331826	0.184753	0.633954	0.130085	0.1573	0.579594	2.06755e+07	3.88583e+07	8.96747e+07	3.76858e+10	4.20377e+10	4.85089e+10	0	0	0.0507313	0.0494864	0.267851	0.380414	1.76571
cro	crypto	2022	4	2022-04-30	0.480843	0.350774	0.350774	0.48337	0.420795	0.410736	0.132597	30	0	0.0313389	0.17165	0.59873	0.160402	0.274317	0.608692	1.01405e+07	2.20927e+07	5.70442e+07	3.50774e+10	4.20795e+10	4.8337e+10	0	0	-0.23845	-0.272399	-1.58694	-1.69823	1.02984
cro	crypto	2022	5	2022-05-31	0.312783	0.18961	0.167429	0.312783	0.214137	0.193454	0.145354	31	0	0.0734994	0.409227	1.4042	0.37182	0.464712	0.813224	6.21953e+06	3.0878e+07	9.34101e+07	1.67429e+10	2.14137e+10	3.12783e+10	0	0	-0.459453	-0.615174	-1.50326	-1.65449	0.523616
cro	crypto	2022	6	2022-06-30	0.178623	0.112441	0.106477	0.18481	0.13964	0.124577	0.0783325	30	0	0.0569892	0.312143	1.08878	0.293046	0.423854	0.881218	6.20912e+06	1.62562e+07	4.71419e+07	1.06477e+10	1.3964e+10	1.8481e+10	0	0	-0.406988	-0.522541	-1.67404	-1.78313	0.252904
cro	crypto	2022	7	2022-07-31	0.112953	0.137124	0.110406	0.138711	0.124057	0.122683	0.0283057	31	0	0.0345982	0.192634	0.660997	0.111122	0.117558	0.876836	6.89925e+06	1.22367e+07	2.54865e+07	1.10406e+10	1.24057e+10	1.38711e+10	0	0	0.21952	0.198457	1.03023	1.78594	0.39722
cro	crypto	2022	8	2022-08-31	0.138258	0.121911	0.118585	0.155263	0.137978	0.142066	0.0366778	31	0	0.0411779	0.229269	0.786703	0.187006	0.23623	0.867711	5.60835e+06	1.96615e+07	1.60891e+08	1.18585e+10	1.37978e+10	1.55263e+10	0	0	-0.110946	-0.117597	-0.512922	-0.628842	0.554891
cro	crypto	2022	9	2022-09-30	0.121896	0.109744	0.101848	0.124525	0.113784	0.113031	0.0226766	30	0	0.0428362	0.234624	0.818385	0.1664	0.182105	0.886383	3.60362e+06	1.8306e+07	1.15923e+08	1.01848e+10	1.13784e+10	1.24525e+10	0	0	-0.0997986	-0.105137	-0.448108	-0.63183	0.542274
cro	crypto	2022	10	2022-10-31	0.111196	0.114788	0.101858	0.114788	0.107782	0.10789	0.01293	31	0	0.0196992	0.10968	0.376352	0.0650455	0.0874992	0.886372	6.47178e+06	1.79346e+07	3.64502e+07	1.01858e+10	1.07782e+10	1.14788e+10	0	0	0.0459621	0.0449371	0.40971	0.690856	0.543268
cro	crypto	2022	11	2022-11-30	0.112003	0.0657231	0.0631551	0.12416	0.0819066	0.0708159	0.0610053	30	0	0.0865864	0.474253	1.65423	0.42046	0.491343	0.929547	9.84845e+06	4.95601e+07	2.30537e+08	6.31551e+09	8.19066e+09	1.2416e+10	0	0	-0.42744	-0.557637	-1.17582	-1.32625	0.375306
cro	crypto	2022	12	2022-12-31	0.0654637	0.0555484	0.0552326	0.0684588	0.060632	0.0604965	0.0132261	31	0	0.0269024	0.149786	0.513969	0.125284	0.193199	0.938385	6.46665e+06	1.72025e+07	1.47847e+08	5.52326e+09	6.0632e+09	6.84588e+09	0	0	-0.154812	-0.168196	-1.12291	-1.34252	0.202076
cro	crypto	2023	1	2023-01-31	0.0566028	0.078795	0.0566028	0.0824505	0.0713392	0.0741079	0.0258478	31	0	0.0379857	0.211496	0.725717	0.130181	0.121618	0.936856	7.53723e+06	2.28898e+07	9.52545e+07	5.66028e+09	7.13392e+09	8.24505e+09	0	0	0.418493	0.349595	1.65297	2.68544	0.14857
cro	crypto	2023	2	2023-02-28	0.0804986	0.0783247	0.0739254	0.0862564	0.0801053	0.0800711	0.012331	28	0	0.0342215	0.181083	0.653801	0.129058	0.120426	0.917532	9.60712e+06	2.25398e+07	8.20574e+07	7.39254e+09	8.01053e+09	8.62564e+09	0	0	-0.00596921	-0.00598709	-0.0330627	-0.0463908	0.155162
cro	crypto	2023	3	2023-03-31	0.0795487	0.0691578	0.062646	0.0795487	0.0700281	0.0701092	0.0169027	31	0	0.0328785	0.18306	0.628143	0.145251	0.212482	0.930115	4.92713e+06	1.33119e+07	4.32023e+07	6.2646e+09	7.00281e+09	7.95487e+09	0	0	-0.117036	-0.124471	-0.679948	-0.856937	0.1322
cro	crypto	2023	4	2023-04-30	0.0693286	0.0731245	0.0667429	0.078003	0.0699324	0.0688928	0.0112602	30	0	0.0254388	0.139334	0.486008	0.0957163	0.0797182	0.925545	6.36471e+06	1.9291e+07	1.05964e+08	6.67429e+09	6.99324e+09	7.8003e+09	0	0	0.0573565	0.0557719	0.400275	0.582679	0.0903544
cro	crypto	2023	5	2023-05-31	0.0705274	0.0595147	0.0595147	0.0729594	0.0641887	0.0631147	0.0134446	31	0	0.017471	0.0972742	0.333782	0.090261	0.184276	0.933608	1.6388e+06	7.25911e+06	4.22035e+07	5.95147e+09	6.41887e+09	7.29594e+09	0	0	-0.186117	-0.205939	-2.1171	-2.2816	-0.119731
cro	crypto	2023	6	2023-06-30	0.0585146	0.0562792	0.0516066	0.0607387	0.0561592	0.0563906	0.00913212	30	0	0.0229098	0.125482	0.43769	0.0986465	0.150351	0.94243	2.06702e+06	4.89968e+06	1.27507e+07	5.16066e+09	5.61592e+09	6.07387e+09	0	0	-0.0543649	-0.0558985	-0.445471	-0.566655	-0.254577
cro	crypto	2023	7	2023-07-31	0.057245	0.0586795	0.0559296	0.0610532	0.0585638	0.0589583	0.00512366	31	0	0.0152548	0.0849351	0.291442	0.0468451	0.0403149	0.937607	1.86712e+06	5.41486e+06	1.93657e+07	5.59296e+09	5.85638e+09	6.10532e+09	0	0	0.0426494	0.041765	0.491728	0.891556	-0.317486
cro	crypto	2023	8	2023-08-31	0.0593541	0.0503084	0.0503084	0.0595481	0.0547233	0.0542308	0.00923975	31	0	0.014467	0.0805486	0.276391	0.0726399	0.155164	0.943878	1.12927e+06	4.79378e+06	1.8261e+07	5.03084e+09	5.47233e+09	5.95481e+09	0	0	-0.142659	-0.153919	-1.91089	-2.11894	-0.372222
cro	crypto	2023	9	2023-09-30	0.049955	0.0508152	0.049939	0.0527718	0.0507866	0.0506615	0.00283279	30	0	0.012282	0.0672711	0.234646	0.0512364	0.0536801	0.94429	1.90544e+06	3.99169e+06	1.06495e+07	4.9939e+09	5.07866e+09	5.27718e+09	0	0	0.0100744	0.0100239	0.149008	0.195641	-0.330523
cro	crypto	2023	10	2023-10-31	0.0518321	0.0618774	0.048987	0.0618774	0.0535681	0.0521861	0.0128904	31	0	0.0166382	0.0926374	0.317872	0.0396197	0.0548908	0.945352	1.33759e+06	4.76796e+06	1.53971e+07	4.8987e+09	5.35681e+09	6.18774e+09	0	0	0.217695	0.19696	2.12614	4.97126	-0.109966
cro	crypto	2023	11	2023-11-30	0.0623186	0.0887301	0.0623186	0.109259	0.0885921	0.0925133	0.0469402	30	0	0.068119	0.373103	1.30141	0.203627	0.227403	0.93048	5.07233e+06	2.43175e+07	1.21949e+08	6.23186e+09	8.85921e+09	1.09259e+10	0	0	0.433967	0.360445	0.966073	1.77012	0.0880507
cro	crypto	2023	12	2023-12-31	0.0918507	0.0988639	0.0918507	0.108046	0.0986401	0.0986796	0.0161958	31	0	0.0310275	0.172754	0.592779	0.10744	0.108078	0.897535	5.95646e+06	1.54478e+07	5.72463e+07	9.18507e+09	9.86401e+09	1.08046e+10	0	0	0.114209	0.108144	0.626004	1.00655	0.205104
cro	crypto	2024	1	2024-01-31	0.100208	0.0815595	0.076636	0.103518	0.0869611	0.0868672	0.0268816	31	0	0.0342689	0.190801	0.654707	0.15517	0.259681	0.914508	3.51274e+06	1.01669e+07	3.99228e+07	7.6636e+09	8.69611e+09	1.03518e+10	0	0	-0.175032	-0.192411	-1.00844	-1.24	0.101831
cro	crypto	2024	2	2024-02-29	0.0811526	0.109297	0.0803919	0.109297	0.0900792	0.0901188	0.0289047	29	0	0.0209794	0.112978	0.400811	0.0356882	0.0310128	0.910318	3.1197e+06	1.11535e+07	3.49628e+07	8.03919e+09	9.00792e+09	1.09297e+10	0	0	0.340084	0.292732	2.59106	8.2025	-0.073966
cro	crypto	2024	3	2024-03-31	0.126024	0.153019	0.121382	0.169531	0.148012	0.148464	0.0481485	31	0	0.0640803	0.356784	1.22425	0.190461	0.284011	0.864591	1.16132e+07	4.63667e+07	3.2782e+08	1.21382e+10	1.48012e+10	1.69531e+10	0	0	0.400034	0.336496	0.943137	1.76675	-0.105151
cro	crypto	2024	4	2024-04-30	0.15337	0.134326	0.121142	0.15337	0.135095	0.132313	0.0322276	30	0	0.0380312	0.208306	0.726586	0.17129	0.21013	0.864859	7.72344e+06	2.25028e+07	6.684e+07	1.21142e+10	1.35095e+10	1.5337e+10	0	0	-0.122162	-0.130293	-0.625491	-0.760661	-0.130097
cro	crypto	2024	5	2024-05-31	0.127808	0.113356	0.113356	0.133584	0.12418	0.124958	0.0202281	31	0	0.0236391	0.131617	0.451624	0.102623	0.151426	0.873545	4.8059e+06	1.03797e+07	2.9706e+07	1.13356e+10	1.2418e+10	1.33584e+10	0	0	-0.156111	-0.169734	-1.28961	-1.65396	-0.034707
cro	crypto	2024	6	2024-06-30	0.111732	0.0916629	0.0881362	0.118921	0.100172	0.0993464	0.0307847	30	0	0.0264297	0.144761	0.504939	0.118344	0.258867	0.901679	2.56363e+06	8.50037e+06	2.15636e+07	8.81362e+09	1.00172e+10	1.18921e+10	0	0	-0.191372	-0.212417	-1.46736	-1.79491	-0.0773506
cro	crypto	2024	7	2024-07-31	0.0917434	0.0864146	0.082244	0.0952658	0.0898713	0.0905098	0.0130219	31	0	0.0232668	0.129544	0.444512	0.0983603	0.103544	0.908252	2.3764e+06	6.06234e+06	1.93925e+07	8.2244e+09	8.98713e+09	9.52658e+09	0	0	-0.0572564	-0.0589609	-0.455141	-0.599439	-0.137255
cro	crypto	2024	8	2024-08-31	0.087314	0.0812021	0.0754162	0.0943447	0.0855158	0.0867789	0.0189285	31	0	0.0358765	0.199752	0.68542	0.129246	0.147539	0.915869	2.03857e+06	1.01808e+07	7.82053e+07	7.54162e+09	8.55158e+09	9.43447e+09	0	0	-0.0603193	-0.0622152	-0.311462	-0.481371	-0.207361
cro	crypto	2024	9	2024-09-30	0.078718	0.0836922	0.0748009	0.0879326	0.0818112	0.0806337	0.0131317	30	0	0.0231471	0.126782	0.442225	0.0832246	0.0743742	0.916555	2.18026e+06	4.71374e+06	1.93294e+07	7.48009e+09	8.18112e+09	8.79326e+09	0	0	0.0306657	0.0302049	0.238243	0.362932	-0.206318
cro	crypto	2024	10	2024-10-31	0.0796849	0.0730188	0.071757	0.0809866	0.0770548	0.0774085	0.00922961	31	0	0.0218437	0.121621	0.417324	0.101817	0.113965	0.919951	2.06894e+06	4.06189e+06	1.00677e+07	7.1757e+09	7.70548e+09	8.09866e+09	0	0	-0.127532	-0.136429	-1.12176	-1.33995	-0.321648
cro	crypto	2024	11	2024-11-30	0.0732868	0.186512	0.0704712	0.205122	0.148221	0.170199	0.134651	30	0	0.118293	0.647918	2.25999	0.235789	0.271561	0.921385	2.00631e+06	1.32302e+08	8.69719e+08	7.04712e+09	1.48221e+10	2.05122e+10	1	0	1.5543	0.937779	1.44737	3.9772	-0.381314
cro	crypto	2024	12	2024-12-31	0.191898	0.14095	0.14095	0.214596	0.174428	0.174115	0.0736456	31	0	0.0507778	0.282719	0.970108	0.226706	0.343183	0.842762	1.18024e+07	6.39725e+07	2.59087e+08	1.4095e+10	1.74428e+10	2.14596e+10	0	0	-0.244284	-0.28009	-0.990701	-1.23548	-0.404844
cro	crypto	2025	1	2025-01-31	0.150115	0.129563	0.127336	0.161788	0.141304	0.139051	0.0344522	31	0	0.0355742	0.198069	0.679643	0.149283	0.212946	0.85795	7.72862e+06	2.45806e+07	7.99354e+07	1.27336e+10	1.41304e+10	1.61788e+10	0	0	-0.0807913	-0.0842421	-0.425318	-0.56431	-0.369276
cro	crypto	2025	2	2025-02-28	0.123718	0.0734815	0.0733918	0.123718	0.090796	0.0898226	0.0503264	28	0	0.0396788	0.209961	0.758063	0.220458	0.406783	0.918127	4.98609e+06	1.71781e+07	6.17331e+07	7.33918e+09	9.0796e+09	1.23718e+10	0	0	-0.432849	-0.56713	-2.70113	-2.57251	-0.503633
cro	crypto	2025	3	2025-03-31	0.0733983	0.0989684	0.0733983	0.104439	0.0860145	0.0826694	0.0310405	31	0	0.0580114	0.322994	1.10831	0.169117	0.142122	0.91812	6.99454e+06	5.30883e+07	2.84205e+08	7.33983e+09	8.60145e+09	1.04439e+10	0	0	0.346848	0.297767	0.921896	1.76071	-0.450227
cro	crypto	2025	4	2025-04-30	0.104238	0.0881222	0.0802553	0.104238	0.088136	0.0880321	0.0239832	30	0	0.0463881	0.254078	0.886243	0.185663	0.23008	0.910471	4.11349e+06	1.77883e+07	6.77857e+07	8.02553e+09	8.8136e+09	1.04238e+10	0	0	-0.109593	-0.116077	-0.456855	-0.625202	-0.4308
cro	crypto	2025	5	2025-05-31	0.090167	0.105897	0.0880761	0.105897	0.0969778	0.0976219	0.0178213	31	0	0.0299462	0.166733	0.572121	0.102246	0.0966118	0.901746	5.56919e+06	1.55229e+07	6.35773e+07	8.80761e+09	9.69778e+09	1.05897e+10	0	0	0.201712	0.183747	1.10204	1.79711	-0.240213
cro	crypto	2025	6	2025-06-30	0.106168	0.0818468	0.0798638	0.106168	0.0914939	0.0910187	0.0263046	30	0	0.0247153	0.135371	0.472186	0.117088	0.247763	0.910908	3.2739e+06	7.9521e+06	2.40151e+07	7.98638e+09	9.14939e+09	1.06168e+10	0	0	-0.227113	-0.257622	-1.90307	-2.20025	-0.158657
cro	crypto	2025	7	2025-07-31	0.0797461	0.139502	0.0797461	0.145743	0.111569	0.108228	0.0659972	31	0	0.0438643	0.244226	0.838026	0.0842009	0.0428251	0.911039	2.59017e+06	3.53303e+07	1.53549e+08	7.97461e+09	1.11569e+10	1.45743e+10	0	0	0.704427	0.533229	2.18334	6.33281	0.00907839
cro	crypto	2025	8	2025-08-31	0.131125	0.293098	0.124314	0.333519	0.174435	0.154166	0.209205	31	0	0.0925385	0.515233	1.76795	0.222962	0.186931	0.861321	1.23025e+07	2.02302e+08	2.3334e+09	1.24314e+10	1.74435e+10	3.33519e+10	0	0	1.10104	0.742431	1.44096	3.32985	0.560455
cro	crypto	2025	9	2025-09-30	0.269497	0.197336	0.186216	0.278825	0.234503	0.236655	0.0926089	30	0	0.0320376	0.175477	0.612077	0.16577	0.33214	0.792266	1.50737e+07	8.64071e+07	2.88295e+08	1.86216e+10	2.34503e+10	2.78825e+10	0	0	-0.326724	-0.3956	-2.25443	-2.38644	0.356461
cro	crypto	2025	10	2025-10-31	0.202892	0.145606	0.140097	0.217496	0.166852	0.15204	0.0773985	31	0	0.0618618	0.344432	1.18187	0.307834	0.355862	0.843714	1.2264e+07	3.6287e+07	1.17472e+08	1.40097e+10	1.66852e+10	2.17496e+10	0	0	-0.26214	-0.304002	-0.882618	-0.987551	0.136133
cro	crypto	2025	11	2025-11-30	0.14705	0.106696	0.0986171	0.14705	0.117396	0.113639	0.0484327	30	0	0.0474515	0.259902	0.906559	0.214299	0.329362	0.889987	5.2863e+06	2.18945e+07	4.90468e+07	9.86171e+09	1.17396e+10	1.4705e+10	0	0	-0.267231	-0.310924	-1.19631	-1.45089	0.275617
cro	crypto	2025	12	2025-12-31	0.101994	0.0906307	0.0901913	0.110445	0.0979974	0.0959262	0.0202537	31	0	0.0235895	0.131341	0.450678	0.0969416	0.183383	0.899387	2.35711e+06	9.23722e+06	2.482e+07	9.01913e+09	9.79974e+09	1.10445e+10	0	0	-0.15057	-0.163189	-1.24249	-1.68338	0.25659
cro	crypto	2026	1	2026-01-31	0.0935772	0.0792479	0.0792479	0.110476	0.0967008	0.0992214	0.0312282	31	0	0.0309648	0.172405	0.591582	0.131322	0.282669	0.911595	3.68748e+06	1.16307e+07	3.49498e+07	7.92479e+09	9.67008e+09	1.10476e+10	0	0	-0.125595	-0.134212	-0.77847	-1.02201	0.00262107
cro	crypto	2026	2	2026-02-28	0.078417	0.076365	0.0718494	0.0834028	0.0783968	0.0783994	0.0115534	28	0	0.0391308	0.207061	0.747593	0.143826	0.137971	0.919848	2.88918e+06	1.05798e+07	3.1898e+07	7.18494e+09	7.83968e+09	8.34028e+09	0	0	-0.036379	-0.0370572	-0.178968	-0.257652	-0.011374
cro	crypto	2026	3	2026-03-31	0.0748085	0.0704364	0.0697823	0.081307	0.0751015	0.0750847	0.0115247	31	0	0.0175531	0.0977313	0.335351	0.0761985	0.141744	0.922154	1.72181e+06	3.94273e+06	6.62091e+06	6.97823e+09	7.51015e+09	8.1307e+09	0	0	-0.0776341	-0.0808132	-0.826892	-1.06056	0.00806279
cro	crypto	2026	4	2026-04-30	0.0708687	0.0684227	0.0680159	0.0716467	0.0697762	0.0698415	0.00363074	30	0	0.0149233	0.0817385	0.28511	0.0524553	0.0506756	0.924124	1.11339e+06	3.7195e+06	6.68348e+06	6.80159e+09	6.97762e+09	7.16467e+09	0	0	-0.0285895	-0.0290061	-0.354865	-0.552968	-0.0285815
crv	crypto	2020	8	2020-08-31	7.03515	4.23533	2.66353	7.03515	3.82329	3.56283	4.37162	17	0	0.150893	0.603573	2.88281	0.483667	0.621397	0.621397	1.98628e+07	4.80614e+07	1.33661e+08	3.48776e+09	5.00571e+09	9.17605e+09	0	0
crv	crypto	2020	9	2020-09-30	5.40231	0.949415	0.889678	5.40231	1.7819	1.43885	4.51263	30	0	0.153223	0.839239	2.92733	0.775338	0.835315	0.873538	1.81339e+07	5.01989e+07	1.92643e+08	1.18502e+09	2.35822e+09	7.11014e+09	0	0	-0.775834	-1.49537	-1.78182	-1.92867
crv	crypto	2020	10	2020-10-31	0.86312	0.41637	0.336641	0.86312	0.513337	0.501461	0.526479	31	0	0.12131	0.675426	2.31763	0.494858	0.609972	0.952149	1.04013e+07	2.62539e+07	8.54118e+07	4.56161e+08	6.91667e+08	1.15459e+09	0	0	-0.561445	-0.82427	-1.22037	-1.66567
crv	crypto	2020	11	2020-11-30	0.401909	0.677363	0.34288	0.878025	0.615545	0.64341	0.535144	30	0	0.0922828	0.505454	1.76306	0.272351	0.343485	0.951262	1.08836e+07	4.97515e+07	1.03705e+08	4.66996e+08	8.43718e+08	1.20358e+09	0	0	0.626827	0.486632	0.962762	1.78678
crv	crypto	2020	12	2020-12-31	0.681491	0.63078	0.425557	0.831854	0.609708	0.616308	0.406296	31	0	0.0949082	0.528426	1.81322	0.403579	0.488423	0.93951	1.70433e+07	3.55535e+07	8.62663e+07	5.9359e+08	8.47004e+08	1.14892e+09	0	0	-0.0687706	-0.0712497	-0.134834	-0.176545
crv	crypto	2021	1	2021-01-31	0.628956	2.5178	0.611403	2.5178	1.33375	1.16238	1.9064	31	0	0.143512	0.799043	2.7418	0.347992	0.211403	0.913093	3.79632e+07	1.90495e+08	4.55912e+08	8.57127e+08	1.88823e+09	3.5843e+09	2	0	2.99157	1.38418	1.7323	3.97763
crv	crypto	2021	2	2021-02-28	2.54273	1.77967	1.77967	3.52252	2.7426	2.80248	1.74285	28	0	0.0759089	0.401672	1.45024	0.312906	0.494773	0.747031	9.14517e+07	2.14359e+08	3.98369e+08	2.56638e+09	3.92893e+09	5.04007e+09	0	0	-0.293164	-0.346957	-0.863782	-1.10882
crv	crypto	2021	3	2021-03-31	1.98129	3.10629	1.98129	3.51687	2.5071	2.40767	1.53558	31	0	0.0994556	0.553745	1.9001	0.28403	0.182891	0.718372	8.7745e+07	1.94107e+08	4.94837e+08	2.85974e+09	3.64772e+09	5.14884e+09	0	0	0.745425	0.556998	1.00587	1.96105
crv	crypto	2021	4	2021-04-30	3.32618	3.32013	2.35968	4.00822	3.09317	3.05164	1.64853	30	0	0.0859601	0.470823	1.64226	0.301906	0.411288	0.664587	9.90265e+07	2.51249e+08	8.01953e+08	3.50429e+09	4.56996e+09	5.92465e+09	0	0	0.0688423	0.0665761	0.141404	0.220519
crv	crypto	2021	5	2021-05-31	3.39885	1.94691	1.32024	3.65809	2.66379	3.08744	2.33784	31	0	0.141027	0.785205	2.69432	0.669101	0.639089	0.812336	1.32439e+08	3.04779e+08	1.06403e+09	1.98801e+09	3.99222e+09	5.48034e+09	0	0	-0.413605	-0.533761	-0.679772	-0.797728
crv	crypto	2021	6	2021-06-30	2.04896	1.81515	1.39255	2.68432	2.01281	2.07093	1.29177	30	0	0.0875723	0.479653	1.67307	0.376856	0.481227	0.802058	5.72738e+07	1.48599e+08	3.91265e+08	2.13018e+09	3.06669e+09	4.06773e+09	0	0	-0.0676743	-0.0700731	-0.146091	-0.185941
crv	crypto	2021	7	2021-07-31	1.70255	1.7211	1.28151	1.95898	1.62129	1.60148	0.677466	31	0	0.048895	0.272236	0.934138	0.186526	0.345826	0.817841	2.88213e+07	5.1614e+07	1.14597e+08	1.98804e+09	2.50987e+09	3.01833e+09	0	0	-0.0518134	-0.053204	-0.195433	-0.285237
crv	crypto	2021	8	2021-08-31	1.66463	2.23608	1.57023	2.44364	2.04045	2.08882	0.873411	31	0	0.062645	0.348793	1.19683	0.200987	0.180739	0.776803	4.36675e+07	1.04863e+08	1.91745e+08	2.45203e+09	3.20617e+09	3.84823e+09	0	0	0.299215	0.26176	0.750475	1.30237
crv	crypto	2021	9	2021-09-30	2.28931	2.32421	1.9862	3.11295	2.44742	2.383	1.12675	30	0	0.1022	0.559774	1.95253	0.413817	0.300045	0.717675	7.40106e+07	1.96602e+08	4.79895e+08	3.14947e+09	3.8939e+09	4.95473e+09	0	0	0.0394096	0.0386529	0.0690509	0.0934058
crv	crypto	2021	10	2021-10-31	2.52423	4.42163	2.52423	4.73721	3.28543	2.90547	2.21298	31	0	0.0731333	0.407189	1.39721	0.139258	0.0829873	0.641198	5.59853e+07	2.41446e+08	8.90199e+08	4.04142e+09	5.29656e+09	7.67115e+09	0	0	0.902424	0.643129	1.57944	4.61827
crv	crypto	2021	11	2021-11-30	4.48696	4.93503	3.72444	5.86775	4.42058	4.22426	2.14332	30	0	0.0701758	0.384369	1.34071	0.239861	0.199054	0.470596	1.02398e+08	3.05579e+08	8.67423e+08	6.07644e+09	7.21323e+09	9.61205e+09	0	0	0.116111	0.10985	0.285794	0.457974
crv	crypto	2021	12	2021-12-31	4.98249	5.40134	3.34522	5.86106	4.4087	4.3005	2.51584	31	0	0.0795516	0.442925	1.51983	0.315576	0.328605	0.5245	1.07423e+08	3.3847e+08	6.4268e+08	5.51716e+09	7.28322e+09	9.71425e+09	0	0	0.09449	0.0902885	0.203846	0.286107
crv	crypto	2022	1	2022-01-31	6.22834	3.28085	2.76369	6.48818	4.35952	4.58659	3.72449	31	0	0.0737485	0.410614	1.40896	0.340584	0.574042	0.60716	1.78834e+08	4.66084e+08	9.48922e+08	4.63905e+09	7.28103e+09	1.07913e+10	0	0	-0.392587	-0.498546	-1.21415	-1.46379
crv	crypto	2022	2	2022-02-28	3.47469	2.43197	2.18029	3.58223	2.89643	2.88583	1.40194	28	0	0.064322	0.34036	1.22887	0.26506	0.39136	0.690087	7.34712e+07	1.60906e+08	2.66907e+08	3.70264e+09	4.8938e+09	6.03791e+09	0	0	-0.258738	-0.299401	-0.879659	-1.12956
crv	crypto	2022	3	2022-03-31	2.53829	2.63372	1.91538	2.82431	2.27548	2.24668	0.908932	31	0	0.0492231	0.274062	0.940405	0.195766	0.276719	0.727741	4.22645e+07	1.05942e+08	2.23652e+08	3.26984e+09	3.88945e+09	4.85137e+09	0	0	0.0829588	0.0796969	0.290798	0.407102
crv	crypto	2022	4	2022-04-30	2.80096	2.00263	2.00263	2.95462	2.44668	2.38198	0.951996	30	0	0.0628334	0.344152	1.20043	0.280236	0.322205	0.71534	2.7973e+07	1.02863e+08	2.35232e+08	3.4791e+09	4.22763e+09	5.083e+09	0	0	-0.23962	-0.273936	-0.795974	-0.977522
crv	crypto	2022	5	2022-05-31	2.06993	1.38972	1.07631	2.60289	1.58996	1.38418	1.52658	31	0	0.0930296	0.517967	1.77733	0.4379	0.586494	0.84701	3.19885e+07	1.05009e+08	2.6571e+08	1.88298e+09	2.7761e+09	4.52796e+09	0	0	-0.30605	-0.365355	-0.705364	-0.834336
crv	crypto	2022	6	2022-06-30	1.27641	0.669154	0.583846	1.28495	0.886521	0.791409	0.701106	30	0	0.0800324	0.438355	1.52902	0.385927	0.545628	0.91701	1.9377e+07	4.26347e+07	1.16828e+08	1.03232e+09	1.56508e+09	2.26222e+09	0	0	-0.518499	-0.730846	-1.66725	-1.89374
crv	crypto	2022	7	2022-07-31	0.75117	1.31893	0.75117	1.53872	1.13499	1.15618	0.787549	31	0	0.0917447	0.510813	1.75278	0.247443	0.197633	0.893226	2.9256e+07	7.10546e+07	1.53148e+08	1.33439e+09	2.02801e+09	2.75977e+09	0	0	0.971039	0.678561	1.32839	2.74229
crv	crypto	2022	8	2022-08-31	1.30764	1.14889	0.998552	1.43498	1.23415	1.28664	0.436429	31	0	0.0531315	0.295823	1.01507	0.219809	0.304136	0.858063	2.28899e+07	4.49456e+07	7.3161e+07	1.80586e+09	2.22683e+09	2.58801e+09	0	0	-0.128919	-0.138021	-0.466564	-0.627911
crv	crypto	2022	9	2022-09-30	1.15245	0.914237	0.859851	1.2501	1.03293	1.05162	0.390252	30	0	0.0555671	0.304354	1.06161	0.240575	0.312176	0.877778	1.66961e+07	4.65504e+07	8.6044e+07	1.56844e+09	1.88084e+09	2.27317e+09	0	0	-0.204246	-0.228465	-0.750657	-0.949663
crv	crypto	2022	10	2022-10-31	0.88977	0.884699	0.801969	0.945965	0.879065	0.88977	0.143996	31	0	0.0342648	0.190778	0.654629	0.125012	0.120863	0.886006	6.21788e+06	2.32581e+07	4.10159e+07	1.47233e+09	1.61525e+09	1.74415e+09	0	0	-0.0323088	-0.0328422	-0.172149	-0.262713
crv	crypto	2022	11	2022-11-30	0.892948	0.672786	0.501052	1.02415	0.701806	0.667717	0.523097	30	0	0.109229	0.598272	2.08682	0.46082	0.510763	0.928779	9.91594e+06	6.02659e+07	5.13528e+08	9.30114e+08	1.30035e+09	1.89204e+09	0	0	-0.239531	-0.27382	-0.457684	-0.5942
crv	crypto	2022	12	2022-12-31	0.639832	0.525105	0.509209	0.678017	0.586251	0.560023	0.168808	31	0	0.0370085	0.206055	0.707046	0.180086	0.248973	0.927619	5.66977e+06	1.45783e+07	2.78343e+07	9.55267e+08	1.0958e+09	1.26396e+09	0	0	-0.219507	-0.247829	-1.20273	-1.37617
crv	crypto	2023	1	2023-01-31	0.526945	1.01724	0.526945	1.13599	0.8253	0.868265	0.609041	31	0	0.0541663	0.301585	1.03485	0.141522	0.126955	0.925098	8.2637e+06	4.2336e+07	8.89604e+07	9.8969e+08	1.55754e+09	2.14939e+09	0	0	0.937218	0.661253	2.19259	4.67245
crv	crypto	2023	2	2023-02-28	1.11174	0.994894	0.927881	1.26586	1.0799	1.07844	0.337984	28	0	0.0614735	0.325287	1.17445	0.228247	0.221149	0.868108	2.19184e+07	6.20432e+07	1.61918e+08	1.76336e+09	2.05365e+09	2.41092e+09	0	0	-0.0219709	-0.0222158	-0.068296	-0.0973323
crv	crypto	2023	3	2023-03-31	1.03378	0.937716	0.834628	1.03378	0.941249	0.937589	0.199155	31	0	0.0512134	0.285144	0.97843	0.215185	0.192647	0.881363	1.45301e+07	3.62593e+07	7.34913e+07	1.59689e+09	1.80444e+09	1.97841e+09	0	0	-0.057472	-0.0591897	-0.207578	-0.275064
crv	crypto	2023	4	2023-04-30	0.924367	0.912317	0.906491	1.10571	0.985971	0.974617	0.199218	30	0	0.032163	0.176164	0.614473	0.14038	0.174903	0.871148	8.13672e+06	2.53329e+07	5.60943e+07	1.74598e+09	1.90587e+09	2.13773e+09	0	0	-0.0270854	-0.027459	-0.155872	-0.195605
crv	crypto	2023	5	2023-05-31	0.883898	0.817431	0.799658	0.971859	0.853127	0.836887	0.172202	31	0	0.0296488	0.165077	0.566439	0.129797	0.177188	0.886334	8.75647e+06	1.70988e+07	4.57028e+07	1.55592e+09	1.66264e+09	1.88709e+09	0	0	-0.104005	-0.109821	-0.665269	-0.846095
crv	crypto	2023	6	2023-06-30	0.812184	0.761095	0.571435	0.853258	0.703562	0.683933	0.281822	30	0	0.0506468	0.277404	0.967606	0.221213	0.33029	0.918774	1.05654e+07	2.476e+07	6.76279e+07	1.1225e+09	1.38259e+09	1.67099e+09	0	0	-0.0689186	-0.0714086	-0.257417	-0.322805
crv	crypto	2023	7	2023-07-31	0.777429	0.568596	0.568596	0.844743	0.764737	0.778681	0.276147	31	0	0.0449586	0.250319	0.858932	0.220512	0.326901	0.919178	6.85014e+06	3.09776e+07	2.12977e+08	1.13116e+09	1.51518e+09	1.67258e+09	0	0	-0.252924	-0.291588	-1.16487	-1.32233
crv	crypto	2023	8	2023-08-31	0.61087	0.452565	0.451775	0.620434	0.535912	0.540014	0.168659	31	0	0.0321856	0.179202	0.614905	0.141431	0.27184	0.935783	1.02738e+07	5.64819e+07	2.52104e+08	9.03964e+08	1.07008e+09	1.23597e+09	0	0	-0.204066	-0.228239	-1.27364	-1.61379	-0.573523
crv	crypto	2023	9	2023-09-30	0.438677	0.518404	0.401133	0.523101	0.456791	0.442244	0.121968	30	0	0.0312556	0.171194	0.597137	0.0828804	0.110775	0.942982	7.15631e+06	2.16458e+07	9.06236e+07	8.06102e+08	9.18748e+08	1.0548e+09	0	0	0.14548	0.135823	0.79339	1.63879	-0.199361
crv	crypto	2023	10	2023-10-31	0.538588	0.478896	0.413954	0.538588	0.461362	0.4674	0.124633	31	0	0.028577	0.15911	0.545963	0.122361	0.231408	0.941159	8.49615e+06	2.30174e+07	4.25393e+07	8.38588e+08	9.33999e+08	1.08682e+09	0	0	-0.0762113	-0.0792719	-0.49822	-0.647853	0.0521061
crv	crypto	2023	11	2023-11-30	0.519125	0.55739	0.50985	0.631318	0.569392	0.569372	0.121468	30	0	0.0460165	0.252043	0.879144	0.157199	0.168215	0.927528	2.53164e+07	6.00133e+07	1.21848e+08	1.03593e+09	1.16026e+09	1.28552e+09	0	0	0.163907	0.151783	0.60221	0.965545	-0.0686678
crv	crypto	2023	12	2023-12-31	0.570454	0.603781	0.570454	0.717852	0.631978	0.627251	0.147398	31	0	0.0458736	0.255414	0.876415	0.183063	0.195917	0.918914	3.0348e+07	6.3913e+07	1.04076e+08	1.16635e+09	1.29643e+09	1.47077e+09	0	0	0.0832283	0.0799458	0.313005	0.436711	-0.0158001
crv	crypto	2024	1	2024-01-31	0.628367	0.454951	0.447113	0.62871	0.526884	0.533851	0.181596	31	0	0.0443977	0.247196	0.848218	0.203766	0.28884	0.936446	2.25498e+07	4.11138e+07	1.0927e+08	9.24987e+08	1.08794e+09	1.29459e+09	0	0	-0.246496	-0.283021	-1.14492	-1.38895	-0.474403
crv	crypto	2024	2	2024-02-29	0.445338	0.598466	0.445338	0.59912	0.528464	0.527267	0.153782	29	0	0.028187	0.151791	0.538511	0.0723568	0.051464	0.936698	1.88283e+07	3.87268e+07	9.09412e+07	9.22785e+08	1.09837e+09	1.24747e+09	0	0	0.315451	0.27418	1.80629	3.78927	-0.332458
crv	crypto	2024	3	2024-03-31	0.652458	0.692424	0.598815	0.863411	0.724268	0.69338	0.264596	31	0	0.0673442	0.374956	1.28661	0.231236	0.306455	0.914882	2.31127e+07	7.77682e+07	1.98313e+08	1.2527e+09	1.51418e+09	1.80402e+09	0	0	0.156998	0.145828	0.388921	0.630646	-0.429669
crv	crypto	2024	4	2024-04-30	0.656336	0.408794	0.408794	0.656336	0.509093	0.458005	0.247542	30	0	0.0573655	0.314204	1.09597	0.301996	0.377157	0.941893	1.81071e+07	4.00707e+07	9.84699e+07	8.62851e+08	1.07093e+09	1.3775e+09	0	0	-0.409618	-0.526986	-1.67721	-1.74501	-0.543657
crv	crypto	2024	5	2024-05-31	0.418501	0.462178	0.400526	0.498416	0.448299	0.440375	0.09789	31	0	0.0344774	0.191962	0.65869	0.106618	0.10581	0.943068	9.17464e+06	2.78147e+07	7.06008e+07	8.47863e+08	9.49465e+08	1.05744e+09	0	0	0.130589	0.122739	0.639392	1.15121	-0.411995
crv	crypto	2024	6	2024-06-30	0.47427	0.285515	0.27544	0.476473	0.359039	0.332944	0.201032	30	0	0.0704053	0.385625	1.34509	0.347507	0.421918	0.960848	9.15023e+06	8.89709e+07	6.63048e+08	5.88613e+08	7.64942e+08	1.01304e+09	0	0	-0.382242	-0.481658	-1.24903	-1.38604	-0.485877
crv	crypto	2024	7	2024-07-31	0.282481	0.261543	0.236305	0.303898	0.274067	0.272731	0.0675932	31	0	0.0519816	0.289421	0.993108	0.192636	0.169173	0.966411	2.22305e+07	5.36498e+07	1.87575e+08	5.05592e+08	5.87767e+08	6.51568e+08	0	0	-0.0839575	-0.0876925	-0.302992	-0.455223	-0.490095
crv	crypto	2024	8	2024-08-31	0.287183	0.283489	0.210214	0.350149	0.291961	0.29407	0.139934	31	0	0.0707343	0.393832	1.35138	0.252219	0.270254	0.970119	2.85896e+07	8.7238e+07	1.82625e+08	4.5271e+08	6.30217e+08	7.56819e+08	0	0	0.083907	0.0805721	0.204585	0.319453	-0.522962
crv	crypto	2024	9	2024-09-30	0.265372	0.279403	0.255998	0.318193	0.28384	0.281352	0.0621947	30	0	0.0466044	0.255263	0.890375	0.161346	0.121907	0.963612	3.11983e+07	5.26412e+07	8.28156e+07	5.54672e+08	6.15967e+08	6.918e+08	0	0	-0.0144129	-0.0145177	-0.0568738	-0.0899791	-0.532236
crv	crypto	2024	10	2024-10-31	0.258607	0.252792	0.234049	0.275138	0.256783	0.2585	0.0410885	31	0	0.0288556	0.160661	0.551285	0.127807	0.149338	0.966731	1.07263e+07	2.98326e+07	6.89989e+07	5.11339e+08	5.60143e+08	6.00612e+08	0	0	-0.095241	-0.100087	-0.622968	-0.783111	-0.644948
crv	crypto	2024	11	2024-11-30	0.247571	0.685791	0.22416	0.685791	0.36385	0.31656	0.461631	30	0	0.0781439	0.428012	1.49294	0.172471	0.0945635	0.968137	1.79189e+07	1.06018e+08	2.81273e+08	4.90566e+08	7.98222e+08	1.50748e+09	0	0	1.71286	0.998004	2.33172	5.78649	-0.505702
crv	crypto	2024	12	2024-12-31	0.67293	0.892856	0.67293	1.24275	0.999813	1.02351	0.56982	31	0	0.0906961	0.504974	1.73275	0.286006	0.365762	0.904348	1.09156e+08	3.11374e+08	7.97698e+08	1.47964e+09	2.20379e+09	2.73454e+09	0	0	0.301937	0.263853	0.522508	0.922542	-0.473337
crv	crypto	2025	1	2025-01-31	0.960033	0.777869	0.674775	1.08264	0.866284	0.84807	0.407864	31	0	0.0651054	0.362491	1.24384	0.263349	0.376731	0.904085	4.65106e+07	1.23994e+08	2.77892e+08	1.49811e+09	1.91921e+09	2.39342e+09	0	0	-0.128786	-0.137868	-0.380333	-0.523516	-0.412885
crv	crypto	2025	2	2025-02-28	0.687005	0.449536	0.435013	0.687005	0.512795	0.513279	0.251992	28	0	0.0679503	0.359559	1.29819	0.3442	0.366797	0.938166	3.13031e+07	8.78655e+07	3.01321e+08	9.70244e+08	1.14176e+09	1.52618e+09	0	0	-0.422093	-0.548342	-1.52504	-1.59309	-0.47605
crv	crypto	2025	3	2025-03-31	0.435196	0.501392	0.3687	0.584331	0.451404	0.437722	0.21563	31	0	0.0700245	0.38988	1.33782	0.285664	0.262869	0.947592	2.7065e+07	6.82557e+07	1.18837e+08	8.24322e+08	1.01032e+09	1.31016e+09	0	0	0.115353	0.109171	0.280013	0.382167	-0.469829
crv	crypto	2025	4	2025-04-30	0.539976	0.71274	0.421185	0.71274	0.587059	0.59942	0.291555	30	0	0.0691681	0.378849	1.32145	0.216998	0.219993	0.940131	5.1535e+07	1.12976e+08	2.29528e+08	9.4593e+08	1.32072e+09	1.60713e+09	0	0	0.421524	0.35173	0.928417	1.62089	-0.333418
crv	crypto	2025	5	2025-05-31	0.706948	0.666609	0.662825	0.821562	0.72871	0.734132	0.158737	31	0	0.0466916	0.259968	0.892042	0.169706	0.193214	0.905784	4.30196e+07	9.09888e+07	1.65549e+08	1.50205e+09	1.64755e+09	1.8593e+09	0	0	-0.0647238	-0.0669134	-0.257391	-0.394291	-0.265501
crv	crypto	2025	6	2025-06-30	0.681074	0.524245	0.504548	0.732555	0.602169	0.595514	0.228007	30	0	0.0439051	0.240478	0.838805	0.190737	0.311249	0.928282	2.48492e+07	6.22963e+07	1.20596e+08	1.14853e+09	1.36815e+09	1.66309e+09	0	0	-0.213565	-0.240245	-0.999029	-1.25956	-0.0966563
crv	crypto	2025	7	2025-07-31	0.500725	0.938649	0.498688	1.10031	0.788867	0.915917	0.601619	31	0	0.0586985	0.326819	1.12143	0.152304	0.14692	0.929115	2.44742e+07	1.78518e+08	4.95491e+08	1.13672e+09	1.80216e+09	2.51688e+09	0	0	0.790478	0.582483	1.78228	3.82447	-0.132602
crv	crypto	2025	8	2025-08-31	0.881542	0.76016	0.76016	1.04478	0.88492	0.881542	0.284619	31	0	0.0540807	0.301109	1.03321	0.248527	0.27242	0.891948	2.94149e+07	1.4025e+08	2.21742e+08	1.74833e+09	2.03081e+09	2.39688e+09	0	0	-0.190155	-0.210912	-0.700453	-0.848649	-0.164902
crv	crypto	2025	9	2025-09-30	0.741333	0.686318	0.635405	0.840864	0.751271	0.763832	0.205459	30	0	0.0432297	0.236779	0.825902	0.187193	0.244343	0.909681	3.38729e+07	7.94321e+07	1.34564e+08	1.46639e+09	1.73146e+09	1.93714e+09	0	0	-0.09714	-0.102188	-0.431575	-0.545895	-0.121301
crv	crypto	2025	10	2025-10-31	0.731054	0.481252	0.481252	0.784134	0.602135	0.553673	0.302882	31	0	0.0831592	0.463011	1.58875	0.395038	0.386263	0.931593	3.43603e+07	1.20861e+08	6.57423e+08	1.1159e+09	1.39321e+09	1.81152e+09	0	0	-0.298792	-0.354951	-0.766615	-0.898525	-0.244424
crv	crypto	2025	11	2025-11-30	0.478381	0.417614	0.370451	0.526735	0.436468	0.42919	0.156285	30	0	0.0563606	0.3087	1.07677	0.214176	0.296704	0.947343	2.07334e+07	5.37798e+07	1.05166e+08	8.61393e+08	1.01404e+09	1.22298e+09	0	0	-0.132234	-0.141834	-0.459455	-0.662229	-0.195567
crv	crypto	2025	12	2025-12-31	0.386978	0.358843	0.338733	0.42122	0.380962	0.382642	0.0824861	31	0	0.0397794	0.221482	0.759983	0.159418	0.195827	0.951851	1.39102e+07	3.07093e+07	6.59445e+07	7.90386e+08	8.88677e+08	9.80903e+08	0	0	-0.14073	-0.151672	-0.684805	-0.951413	-0.158594
crv	crypto	2026	1	2026-01-31	0.39046	0.28797	0.28797	0.433906	0.387714	0.398829	0.145936	31	0	0.040827	0.227315	0.779998	0.165987	0.336331	0.959067	1.13169e+07	2.78214e+07	5.47245e+07	6.7597e+08	9.082e+08	1.01637e+09	0	0	-0.197505	-0.220029	-0.96795	-1.32558	-0.456944
crv	crypto	2026	2	2026-02-28	0.280303	0.250721	0.222298	0.287822	0.249771	0.250419	0.065524	28	0	0.055839	0.295472	1.0668	0.221381	0.227654	0.968402	8.1647e+06	2.36593e+07	6.33815e+07	5.23609e+08	5.87594e+08	6.75847e+08	0	0	-0.129349	-0.138514	-0.468787	-0.625679	-0.492462
crv	crypto	2026	3	2026-03-31	0.241811	0.217685	0.20804	0.255529	0.233846	0.235034	0.0474898	31	0	0.0313265	0.174418	0.598492	0.139401	0.185849	0.970429	6.27409e+06	1.75528e+07	2.59756e+07	4.92225e+08	5.52312e+08	6.03556e+08	0	0	-0.131765	-0.141293	-0.810082	-1.01358	-0.501779
crv	crypto	2026	4	2026-04-30	0.217759	0.234449	0.207098	0.239063	0.222517	0.222378	0.0319644	30	0	0.0308585	0.169019	0.58955	0.103617	0.0715346	0.970562	8.59239e+06	1.72567e+07	2.7813e+07	4.90548e+08	5.27749e+08	5.67099e+08	0	0	0.07701	0.0741886	0.438937	0.715988	-0.474203
dai	stablecoin	2019	11	2019-11-30	1.00272	1.00197	1.00096	1.00347	1.00243	1.00238	0.00250248	11	0	0.00101593	0.00321266	0.0194094	0.00231695	0.00249384	0.00249384	1.66118e+06	3.49269e+06	9.20134e+06	9.09175e+06	1.58082e+07	2.01632e+07	0	0
dai	stablecoin	2019	12	2019-12-31	1.00131	0.993994	0.990682	1.00166	0.996722	0.997826	0.0109813	31	0	0.00396458	0.0220738	0.0757431	0.0161499	0.010963	0.0127403	1.21238e+06	2.28321e+06	3.94121e+06	2.19234e+07	4.39034e+07	4.94277e+07	0	0	-0.00795952	-0.00799137
dai	stablecoin	2020	1	2020-01-31	0.992215	0.999631	0.992215	1.00165	0.997242	0.99728	0.00943866	31	0	0.00197204	0.0109799	0.0376758	0.00686419	0.00743666	0.0112128	1.32997e+06	7.03244e+06	1.2676e+08	4.19466e+07	5.07645e+07	6.08747e+07	0	0	0.00567104	0.00565502
dai	stablecoin	2020	2	2020-02-29	0.998019	1.00733	0.996776	1.00912	1.00038	0.999195	0.0123398	29	0	0.00228314	0.0122951	0.0436193	0.00561655	0.00513469	0.0066671	1.97157e+06	6.16754e+06	1.94513e+07	5.07048e+07	5.26723e+07	5.56259e+07	0	0	0.00770357	0.00767405
dai	stablecoin	2020	3	2020-03-31	1.00897	1.01845	0.997609	1.06631	1.01965	1.01872	0.0686969	31	0	0.0148105	0.0824616	0.282955	0.0544239	0.0486534	0.0486534	2.28917e+06	8.36201e+06	3.91504e+07	4.70792e+07	5.239e+07	6.25792e+07	0	0	0.0110371	0.0109767
dai	stablecoin	2020	4	2020-04-30	1.02129	1.01719	1.00889	1.03926	1.01728	1.01709	0.0303753	30	0	0.00644625	0.0353076	0.123156	0.0236561	0.0292278	0.0538474	1.63718e+06	4.19352e+06	1.38185e+07	5.87478e+07	7.32445e+07	9.06858e+07	0	0	-0.00123816	-0.00123893
dai	stablecoin	2020	5	2020-05-31	1.01561	1.00121	0.999657	1.01561	1.00525	1.00431	0.0159491	31	0	0.0027408	0.0152601	0.0523629	0.0123153	0.0157041	0.0625041	2.2313e+06	4.53641e+06	1.32244e+07	8.94897e+07	1.0043e+08	1.18393e+08	0	0	-0.015708	-0.0158327
dai	stablecoin	2020	6	2020-06-30	1.00389	1.00981	1.00077	1.01241	1.00512	1.00469	0.0116408	30	0	0.00320966	0.0175801	0.0613205	0.00952777	0.010115	0.0614625	2.1294e+06	4.39499e+06	1.53818e+07	1.00101e+08	1.08799e+08	1.14472e+08	0	0	0.00859018	0.0085535
dai	stablecoin	2020	7	2020-07-31	1.01358	1.02204	1.00339	1.03674	1.01712	1.01553	0.0333484	31	0	0.00778492	0.0433446	0.148731	0.0352159	0.0321666	0.0589998	3.265e+06	8.89234e+06	2.23004e+07	1.06826e+08	1.37371e+08	2.33573e+08	0	0	0.0121111	0.0120383
dai	stablecoin	2020	8	2020-08-31	1.01983	1.01592	1.00326	1.01983	1.01312	1.01511	0.0165651	31	0	0.00309319	0.0172222	0.0590954	0.0121312	0.016243	0.0591208	9.88074e+06	2.0459e+07	3.36093e+07	1.57675e+08	2.02283e+08	2.51528e+08	0	0	-0.00598817	-0.00600617
dai	stablecoin	2020	9	2020-09-30	1.01377	1.00963	1.00782	1.03566	1.01766	1.01431	0.0278361	30	0	0.0053335	0.0292128	0.101896	0.0208951	0.0253554	0.0548482	2.54929e+07	5.22903e+07	1.25281e+08	2.81734e+08	4.54052e+08	6.30753e+08	0	0	-0.00618946	-0.0062087
dai	stablecoin	2020	10	2020-10-31	1.01091	1.01002	1.00607	1.01172	1.00941	1.00937	0.00565195	31	0	0.00101265	0.00563819	0.0193466	0.00385045	0.00558646	0.0564888	1.6927e+07	3.10198e+07	5.35061e+07	5.8583e+08	6.11413e+08	6.56774e+08	0	0	0.000381241	0.000381169
dai	stablecoin	2020	11	2020-11-30	1.01065	1.00667	1.00287	1.01081	1.00657	1.0069	0.00794304	30	0	0.000831742	0.00455564	0.0158904	0.00328175	0.00785808	0.0594927	2.37617e+07	5.97751e+07	2.79078e+08	6.20595e+08	6.54427e+08	6.95862e+08	0	0	-0.00331022	-0.00331571
dai	stablecoin	2020	12	2020-12-31	1.00484	1.00414	1.00131	1.00581	1.00327	1.00314	0.00449541	31	0	0.000814401	0.00453439	0.0155591	0.00396713	0.00446945	0.0609511	3.43337e+07	7.4053e+07	2.10067e+08	6.97335e+08	8.61198e+08	1.1623e+09	0	0	-0.00252022	-0.0025234
dai	stablecoin	2021	1	2021-01-31	1.00498	1.0002	0.999753	1.00498	1.0011	1.00073	0.00522421	31	0	0.00134154	0.00746935	0.02563	0.0059525	0.00519834	0.0624142	8.83644e+07	2.33475e+08	6.72295e+08	1.16808e+09	1.40324e+09	1.62493e+09	0	0	-0.00392641	-0.00393414
dai	stablecoin	2021	2	2021-02-28	1.00078	1.00285	0.999577	1.00285	1.0011	1.00109	0.00327255	28	0	0.000680412	0.0036004	0.0129993	0.00205367	0.00267573	0.0625791	1.08235e+08	2.33598e+08	8.88585e+08	1.63974e+09	2.06045e+09	2.34523e+09	0	0	0.00265427	0.00265075
dai	stablecoin	2021	3	2021-03-31	1.00162	0.999612	0.999612	1.00214	1.00111	1.00118	0.00252956	31	0	0.000670627	0.00373389	0.0128123	0.00305113	0.00252415	0.062546	7.92301e+07	1.47354e+08	3.075e+08	2.41173e+09	2.70808e+09	2.92788e+09	0	0	-0.0032281	-0.00323333
dai	stablecoin	2021	4	2021-04-30	1	1.00127	0.999218	1.00174	1.00062	1.00068	0.00251907	30	0	0.000528138	0.00289273	0.0100901	0.00180743	0.00177724	0.0629156	8.87822e+07	2.13599e+08	5.3851e+08	2.96172e+09	3.28299e+09	3.66598e+09	0	0	0.00165577	0.0016544
dai	stablecoin	2021	5	2021-05-31	1.00112	1.0012	1.00025	1.00171	1.00111	1.00114	0.00146409	31	0	0.000514035	0.00286202	0.00982062	0.00202548	0.00146158	0.061949	1.52005e+08	5.285e+08	1.94209e+09	3.73179e+09	4.35282e+09	4.78505e+09	0	0	-7.18332e-05	-7.18358e-05
dai	stablecoin	2021	6	2021-06-30	1.00122	1.00084	1.00015	1.00143	1.00097	1.00098	0.00127447	30	0	0.000396931	0.00217408	0.00758336	0.00139594	0.00125234	0.0620389	1.28527e+08	2.33695e+08	4.61211e+08	4.41239e+09	4.84869e+09	5.15355e+09	0	0	-0.000357017	-0.00035708
dai	stablecoin	2021	7	2021-07-31	1.00041	1.00109	1.00041	1.00145	1.00093	1.00093	0.00103715	31	0	0.000280213	0.00156016	0.00535346	0.000935246	0.000712631	0.0617955	8.65403e+07	1.58898e+08	3.5658e+08	5.15713e+09	5.25508e+09	5.38879e+09	0	0	0.000255268	0.000255235
dai	stablecoin	2021	8	2021-08-31	1.00123	1.00056	1.00024	1.00188	1.0008	1.00076	0.00164121	31	0	0.000429793	0.00239298	0.00821118	0.00173944	0.00163812	0.0619543	9.39765e+07	2.1335e+08	3.33473e+08	5.41174e+09	5.66691e+09	5.85451e+09	0	0	-0.00053263	-0.000532772
dai	stablecoin	2021	9	2021-09-30	1.00067	1.00031	0.999765	1.00067	1.00018	1.00025	0.000900508	30	0	0.000327223	0.00179228	0.00625159	0.00129749	0.000899909	0.062403	7.8387e+07	1.90938e+08	4.94063e+08	5.87831e+09	6.17208e+09	6.31227e+09	0	0	-0.000250802	-0.000250833
dai	stablecoin	2021	10	2021-10-31	1.00059	1	0.999584	1.00071	1.00023	1.00022	0.00113131	31	0	0.000307705	0.00171323	0.0058787	0.00134749	0.0011305	0.062573	8.76536e+07	2.59226e+08	5.62511e+08	6.21038e+09	6.92591e+09	7.78484e+09	0	0	-0.000309616	-0.000309664
dai	stablecoin	2021	11	2021-11-30	1.00074	1.00003	0.999734	1.00086	1.00019	1.00014	0.00113081	30	0	0.000375757	0.00205811	0.00717884	0.00136468	0.00112983	0.0624323	1.34963e+08	3.77763e+08	8.07201e+08	7.80753e+09	8.45767e+09	8.84399e+09	0	0	3.01655e-05	3.0165e-05
dai	stablecoin	2021	12	2021-12-31	1.00005	0.999888	0.999857	1.00018	1.00001	1.00001	0.000321966	31	0	0.000107116	0.000596398	0.00204645	0.00043285	0.000304042	0.0623166	1.256e+08	3.7103e+08	1.0798e+09	8.81622e+09	8.93872e+09	9.05044e+09	0	0	-0.000141944	-0.000141954
dai	stablecoin	2022	1	2022-01-31	0.99994	0.999889	0.999763	1.00024	1.00001	0.999996	0.000479484	31	0	0.000135436	0.000754073	0.00258749	0.000549097	0.000479368	0.0624047	9.29032e+07	2.15184e+08	5.28301e+08	8.93234e+09	9.12236e+09	9.3932e+09	0	0	5.54504e-07	5.54504e-07
dai	stablecoin	2022	2	2022-02-28	0.999912	0.999813	0.999813	1.00096	0.99999	0.999952	0.00114452	28	0	0.00029027	0.00153596	0.00554559	0.00111528	0.00114342	0.0623579	7.08705e+07	1.50472e+08	3.19681e+08	9.16138e+09	9.55366e+09	9.94411e+09	0	0	-7.55514e-05	-7.55543e-05
dai	stablecoin	2022	3	2022-03-31	0.999705	0.999901	0.999705	1.00014	0.999912	0.999901	0.000434182	31	0	0.000125982	0.000701437	0.00240688	0.000474394	0.000426972	0.0624591	6.61319e+07	1.4012e+08	2.40021e+08	9.19447e+09	9.35061e+09	9.54577e+09	0	0	8.83929e-05	8.8389e-05
dai	stablecoin	2022	4	2022-04-30	0.999967	1.00005	0.999732	1.00013	0.999903	0.999895	0.000395578	30	0	0.000122547	0.000671218	0.00234126	0.000492144	0.000387222	0.0624336	5.33392e+07	1.39204e+08	2.7846e+08	8.45408e+09	8.81053e+09	9.20963e+09	0	0	0.000148977	0.000148966
dai	stablecoin	2022	5	2022-05-31	0.999832	0.999668	0.999409	1.00027	0.999774	0.999795	0.000859332	31	0	0.000249879	0.00139127	0.00477393	0.000941265	0.000600276	0.062737	3.71891e+07	1.98836e+08	1.32536e+09	5.98649e+09	6.71685e+09	8.41793e+09	0	0	-0.000382611	-0.000382684
dai	stablecoin	2022	6	2022-06-30	0.99974	0.999609	0.999511	1.00027	0.999782	0.999742	0.000758341	30	0	0.000236298	0.00129426	0.00451447	0.000951659	0.000697053	0.0626409	4.8892e+07	1.52234e+08	5.29012e+08	6.2347e+09	6.39203e+09	6.65578e+09	0	0	-5.87962e-05	-5.87979e-05
dai	stablecoin	2022	7	2022-07-31	0.99961	0.99996	0.999555	1.00015	0.999834	0.999847	0.000594673	31	0	0.000181082	0.00100822	0.00345957	0.000750184	0.000484245	0.0625998	3.02414e+07	9.06424e+07	1.60535e+08	6.39395e+09	6.66255e+09	7.01738e+09	0	0	0.000350678	0.000350617
dai	stablecoin	2022	8	2022-08-31	1.00002	0.999861	0.999685	1.00071	0.999939	0.999912	0.00102703	31	0	0.000262433	0.00146117	0.00501378	0.000928191	0.0010263	0.0624782	3.01418e+07	1.12196e+08	2.78757e+08	6.47321e+09	6.75755e+09	7.11709e+09	0	0	-9.86007e-05	-9.86055e-05
dai	stablecoin	2022	9	2022-09-30	1.00006	0.999737	0.999499	1.00009	0.999866	0.999875	0.000593147	30	0	0.000206625	0.00113173	0.00394756	0.000776569	0.000563713	0.0626521	4.43339e+07	1.10883e+08	2.95817e+08	6.37081e+09	6.43249e+09	6.54959e+09	0	0	-0.000123708	-0.000123716
dai	stablecoin	2022	10	2022-10-31	0.999863	0.999903	0.999485	1.0002	0.999914	0.999939	0.000718979	31	0	0.000208675	0.00116186	0.00398674	0.00068709	0.000592341	0.0626659	4.2712e+07	8.27318e+07	2.00676e+08	5.68323e+09	6.03289e+09	6.40674e+09	0	0	0.000166054	0.00016604
dai	stablecoin	2022	11	2022-11-30	0.999842	0.999933	0.999522	0.999993	0.999828	0.999852	0.000470718	30	0	0.00014741	0.000807396	0.00281626	0.000558925	0.000470721	0.0626305	4.98652e+07	1.46568e+08	6.56141e+08	5.17678e+09	5.44702e+09	5.78645e+09	0	0	2.95046e-05	2.95042e-05
dai	stablecoin	2022	12	2022-12-31	0.999899	0.999919	0.999659	1.00009	0.999867	0.999875	0.000431567	31	0	0.000128786	0.000717053	0.00246046	0.000515685	0.000317052	0.0625021	3.04051e+07	6.80665e+07	1.48274e+08	5.05608e+09	5.15519e+09	5.22298e+09	0	0	-1.36224e-05	-1.36225e-05
dai	stablecoin	2023	1	2023-01-31	0.999955	0.999692	0.999659	0.999971	0.99981	0.99981	0.000312025	31	0	8.5403e-05	0.000475504	0.00163162	0.000339294	0.000295902	0.0625027	2.1015e+07	6.14944e+07	1.10123e+08	5.00342e+09	5.09289e+09	5.1567e+09	0	0	-0.000226745	-0.000226771
dai	stablecoin	2023	2	2023-02-28	0.999746	0.999789	0.999506	0.999964	0.99977	0.999796	0.000458516	28	0	9.67612e-05	0.000512012	0.00184862	0.000307426	0.000298079	0.0626463	2.99485e+07	6.99155e+07	1.3008e+08	5.02074e+09	5.0721e+09	5.10773e+09	0	0	9.68718e-05	9.68671e-05
dai	stablecoin	2023	3	2023-03-31	0.999982	0.99964	0.966993	0.999982	0.998345	0.99964	0.0329888	31	0	0.00771588	0.0429602	0.147412	0.0327284	0.0329894	0.0931369	2.72827e+07	1.82385e+08	1.73435e+09	4.93637e+09	5.30816e+09	6.31003e+09	0	0	-0.000149457	-0.000149468
dai	stablecoin	2023	4	2023-04-30	0.999683	0.999055	0.999055	1.00016	0.999829	0.999833	0.00110275	30	0	0.000228893	0.0012537	0.004373	0.0010993	0.00110258	0.0630689	1.44335e+07	4.83352e+07	8.54642e+07	4.73128e+09	4.93773e+09	5.10839e+09	0	0	-0.000585119	-0.00058529
dai	stablecoin	2023	5	2023-05-31	0.999925	0.99996	0.999494	1.00034	0.999959	0.999952	0.000845532	31	0	0.000266028	0.00148118	0.00508246	0.000933441	0.000845245	0.0626575	2.3277e+07	4.74787e+07	9.45769e+07	4.61892e+09	4.66196e+09	4.72782e+09	0	0	0.000905492	0.000905082
dai	stablecoin	2023	6	2023-06-30	1.00009	0.999754	0.999638	1.00019	0.999919	0.99993	0.000554431	30	0	0.00019013	0.00104139	0.00363243	0.000770024	0.000554325	0.0625221	1.79761e+07	7.28399e+07	3.79958e+08	4.34539e+09	4.48203e+09	4.60266e+09	0	0	-0.000206092	-0.000206113
dai	stablecoin	2023	7	2023-07-31	0.999914	0.999762	0.999222	1.00007	0.999853	0.999873	0.000849598	31	0	0.000246819	0.00137423	0.00471547	0.000968363	0.000849537	0.0629121	1.80306e+07	4.34643e+07	9.73768e+07	4.1489e+09	4.25684e+09	4.34166e+09	0	0	8.37853e-06	8.37849e-06
dai	stablecoin	2023	8	2023-08-31	0.999663	0.999963	0.999663	1.00025	0.999912	0.999909	0.000589061	31	0	0.000151591	0.000844026	0.00289615	0.000561797	0.000547444	0.0624983	1.66079e+07	6.62496e+07	1.61283e+08	3.88142e+09	3.97088e+09	4.11141e+09	0	0	0.000200819	0.000200799
dai	stablecoin	2023	9	2023-09-30	0.999938	0.99986	0.999029	1.00028	0.999903	0.999932	0.00125301	30	0	0.000298961	0.00163748	0.00571164	0.00117547	0.00113807	0.0630936	1.50126e+07	3.98526e+07	7.38045e+07	3.7965e+09	3.84199e+09	3.88008e+09	0	0	-0.000102778	-0.000102783
dai	stablecoin	2023	10	2023-10-31	0.999914	1.00005	0.999679	1.00031	0.999963	0.99997	0.000630472	31	0	0.000177346	0.000987421	0.00338819	0.00070157	0.000630277	0.0624836	1.39255e+07	5.80719e+07	1.46041e+08	3.74414e+09	3.79444e+09	3.83912e+09	0	0	0.000189201	0.000189184
dai	stablecoin	2023	11	2023-11-30	0.999949	0.999958	0.999588	1.00035	1.00001	0.999993	0.000766239	30	0	0.000224282	0.00122844	0.0042849	0.000809346	0.000542582	0.0625693	4.5419e+07	1.59806e+08	4.65145e+08	3.63718e+09	3.68065e+09	3.73027e+09	0	0	-9.13248e-05	-9.1329e-05
dai	stablecoin	2023	12	2023-12-31	1.00006	1.0001	0.998144	1.0004	0.999867	0.999978	0.00225737	31	0	0.000638996	0.00355778	0.012208	0.00259015	0.00191662	0.063923	1.23785e+08	2.40544e+08	5.60919e+08	3.63514e+09	3.69059e+09	3.74609e+09	0	0	0.000139567	0.000139557
dai	stablecoin	2024	1	2024-01-31	1.0002	0.999776	0.999449	1.00058	1.00001	1.00003	0.00112802	31	0	0.000317339	0.00176687	0.00606276	0.00132576	0.000964167	0.0626998	5.01963e+07	1.73275e+08	2.83907e+08	3.67282e+09	3.73051e+09	3.87791e+09	0	0	-0.000321744	-0.000321796
dai	stablecoin	2024	2	2024-02-29	0.999639	0.999655	0.999416	1.00071	0.999936	0.999922	0.00129114	29	0	0.000399965	0.00215388	0.00764133	0.00145558	0.00127152	0.0627306	3.27245e+07	1.15756e+08	3.56613e+08	3.60046e+09	3.66591e+09	3.7149e+09	0	0	-0.000120456	-0.000120464
dai	stablecoin	2024	3	2024-03-31	0.999967	0.998561	0.996924	1.00104	0.999427	0.999699	0.00411144	31	0	0.000972061	0.00541221	0.0185712	0.00400987	0.00410719	0.0650677	1.57833e+08	4.87892e+08	9.91551e+08	3.18243e+09	3.25385e+09	3.46411e+09	0	0	-0.00109465	-0.00109525
dai	stablecoin	2024	4	2024-04-30	0.99941	0.999115	0.997713	1.00228	0.999623	0.99961	0.00457149	30	0	0.00126728	0.00694117	0.0242113	0.00514263	0.00362855	0.0643272	1.49494e+08	5.3437e+08	1.09632e+09	3.18075e+09	3.24512e+09	3.31417e+09	0	0	0.00055507	0.000554916
dai	stablecoin	2024	5	2024-05-31	0.997796	0.999609	0.99444	1.00054	0.999167	0.999336	0.00609833	31	0	0.00141116	0.00785702	0.0269602	0.00514939	0.00544221	0.0673965	1.41326e+08	4.88591e+08	7.55334e+08	3.16607e+09	3.26437e+09	3.31889e+09	0	0	0.000494505	0.000494383
dai	stablecoin	2024	6	2024-06-30	0.999761	0.999577	0.99861	1.00162	0.999513	0.999485	0.00301464	30	0	0.000651491	0.00356836	0.0124467	0.00216216	0.00300975	0.0634863	1.76335e+08	3.28583e+08	6.55417e+08	3.15763e+09	3.25708e+09	3.33911e+09	0	0	-3.19206e-05	-3.19211e-05
dai	stablecoin	2024	7	2024-07-31	0.999289	1.0005	0.997409	1.00077	0.999306	0.999304	0.00336429	31	0	0.00115756	0.00644502	0.0221151	0.0040059	0.00336169	0.0646125	4.08555e+07	2.31979e+08	1.28777e+09	3.16993e+09	3.20731e+09	3.24061e+09	0	0	0.000921145	0.000920721
dai	stablecoin	2024	8	2024-08-31	0.997708	0.997313	0.996302	1.00145	0.998782	0.998986	0.00514522	31	0	0.00226152	0.0125916	0.0432062	0.00879786	0.00513779	0.0656508	4.03461e+07	1.22806e+08	8.7876e+08	3.01674e+09	3.13108e+09	3.2146e+09	0	0	-0.0031835	-0.00318858
dai	stablecoin	2024	9	2024-09-30	0.999163	0.998521	0.997807	1.0031	1.00027	1.00034	0.00529003	30	0	0.00137409	0.00752618	0.0262519	0.00530196	0.0052737	0.0642388	2.6233e+07	6.76416e+07	2.1533e+08	3.02919e+09	3.12069e+09	3.19496e+09	0	0	0.00121123	0.0012105
dai	stablecoin	2024	10	2024-10-31	1.00028	0.999825	0.996629	1.00028	0.999465	0.99984	0.00365592	31	0	0.000984197	0.00547978	0.0188031	0.00363371	0.00365488	0.0653444	1.96725e+07	8.30084e+07	5.00786e+08	2.90059e+09	3.27395e+09	3.37392e+09	0	0	0.00130571	0.00130486
dai	stablecoin	2024	11	2024-11-30	0.999971	1.0004	0.997474	1.00084	0.999869	0.999875	0.003368	30	0	0.00082355	0.00451077	0.0157339	0.00316889	0.00259965	0.0645515	2.15684e+07	1.28035e+08	2.87065e+08	3.22883e+09	3.36973e+09	3.52892e+09	0	0	0.000573124	0.000572959
dai	stablecoin	2024	12	2024-12-31	1.00075	0.999641	0.999641	1.00109	1.0002	1.0001	0.00144541	31	0	0.000384787	0.0021424	0.00735134	0.00162553	0.00144384	0.0625191	3.42407e+07	1.12907e+08	2.57135e+08	3.31591e+09	3.44537e+09	3.5609e+09	0	0	-0.000756227	-0.000756513
dai	stablecoin	2025	1	2025-01-31	0.999884	1.00017	0.999652	1.0005	1.00009	1.00011	0.000843301	31	0	0.000231802	0.00129062	0.00442857	0.000905896	0.000724798	0.0625092	2.75203e+07	9.36701e+07	2.05446e+08	3.2784e+09	3.48646e+09	3.60276e+09	0	0	0.00052512	0.000524982
dai	stablecoin	2025	2	2025-02-28	0.999887	0.999652	0.999581	1.00048	0.999987	0.999986	0.000902765	28	0	0.000297276	0.00157304	0.00567945	0.0010069	0.000902329	0.062576	3.00031e+07	9.89367e+07	3.43675e+08	3.28065e+09	3.45569e+09	3.52132e+09	0	0	-0.000514362	-0.000514494
dai	stablecoin	2025	3	2025-03-31	0.999938	1.00002	0.99956	1.00038	1.00004	1.00007	0.0008201	31	0	0.000205261	0.00114284	0.0039215	0.000786387	0.000819788	0.0625951	2.71258e+07	6.81952e+07	1.50188e+08	3.18187e+09	3.24348e+09	3.35317e+09	0	0	0.000367655	0.000367587
dai	stablecoin	2025	4	2025-04-30	0.99975	1.09075	0.999194	1.09075	1.00397	1.00021	0.091556	30	0	0.0153336	0.0839854	0.292948	0.0155708	0.0155878	0.0629384	2.20967e+07	6.23663e+07	2.19765e+08	3.12024e+09	3.20529e+09	3.54393e+09	0	0	0.0907291	0.0868464
dai	stablecoin	2025	5	2025-05-31	1.07241	0.999812	0.996673	1.07241	1.00247	0.999932	0.075741	31	0	0.0127663	0.0710795	0.243899	0.0711567	0.0706267	0.0862502	2.58189e+07	6.96584e+07	1.73265e+08	3.25632e+09	3.59691e+09	3.99864e+09	0	0	-0.0833719	-0.0870534
dai	stablecoin	2025	6	2025-06-30	1.00021	1.00008	0.999367	1.00039	1.00008	1.0001	0.00102393	30	0	0.000276147	0.00151252	0.00527578	0.00106275	0.000966949	0.0837798	1.47883e+07	4.96913e+07	1.04371e+08	3.53521e+09	3.65118e+09	3.97883e+09	0	0	0.000267736	0.000267701
dai	stablecoin	2025	7	2025-07-31	1.00036	0.999585	0.998919	1.00056	0.999998	0.999997	0.00163743	31	0	0.000466944	0.00259983	0.00892094	0.00187058	0.00143684	0.0841906	2.3683e+07	7.46955e+07	1.46804e+08	3.59813e+09	3.67509e+09	3.7624e+09	0	0	-0.000495099	-0.000495222
dai	stablecoin	2025	8	2025-08-31	1.00043	1.00001	0.999421	1.0005	0.999998	1.00001	0.00107665	31	0	0.000372695	0.00207508	0.00712033	0.00132083	0.00107612	0.0837308	4.12195e+07	9.88353e+07	1.68305e+08	3.72385e+09	4.11988e+09	4.70116e+09	0	0	0.000424067	0.000423977
dai	stablecoin	2025	9	2025-09-30	0.999688	0.999882	0.99928	1.00011	0.999803	0.999806	0.000829453	30	0	0.000274134	0.0015015	0.00523733	0.00103852	0.000826354	0.0838596	3.97133e+07	8.59585e+07	2.02253e+08	4.44308e+09	4.57196e+09	4.69434e+09	0	0	-0.000126852	-0.00012686
dai	stablecoin	2025	10	2025-10-31	0.999677	0.999762	0.997134	1.00024	0.999745	0.999782	0.00310659	31	0	0.000752391	0.00418914	0.0143744	0.00278496	0.00299457	0.0858268	4.39331e+07	9.55903e+07	2.04926e+08	4.52192e+09	4.60644e+09	4.69393e+09	0	0	-0.000120223	-0.00012023
dai	stablecoin	2025	11	2025-11-30	0.99961	0.999609	0.999259	1.0002	0.999741	0.999738	0.000938482	30	0	0.00031048	0.00170057	0.00593172	0.00111485	0.000819517	0.0838791	3.72962e+07	7.84075e+07	2.00219e+08	4.39052e+09	4.51598e+09	4.69363e+09	0	0	-0.000152969	-0.000152981
dai	stablecoin	2025	12	2025-12-31	0.9997	0.999611	0.9993	1.00012	0.999681	0.999653	0.000815889	31	0	0.000287645	0.00160154	0.00549546	0.00106216	0.000815795	0.0838417	1.49218e+07	4.25966e+07	8.08418e+07	4.22574e+09	4.30245e+09	4.39134e+09	0	0	2.06525e-06	2.06525e-06
dai	stablecoin	2026	1	2026-01-31	0.999575	0.999375	0.999249	1.0003	0.999691	0.999666	0.001052	31	0	0.000371366	0.00206768	0.00709494	0.00151131	0.00105168	0.0838882	1.319e+07	5.75564e+07	1.98468e+08	4.22478e+09	4.32614e+09	4.42613e+09	0	0	-0.000235883	-0.000235911
dai	stablecoin	2026	2	2026-02-28	0.999666	1.00023	0.999505	1.00028	0.999884	0.999869	0.000776803	28	0	0.000261314	0.00138275	0.00499241	0.000934402	0.000666226	0.0836538	2.24534e+07	6.41949e+07	2.54312e+08	4.15649e+09	4.20596e+09	4.32013e+09	0	0	0.000860277	0.000859907
dai	stablecoin	2026	3	2026-03-31	0.999858	0.999303	0.999124	1.00039	0.99976	0.999858	0.00126603	31	0	0.000457604	0.00254783	0.00874251	0.00200555	0.00115787	0.0840031	1.48164e+07	3.13293e+07	6.3356e+07	4.20125e+09	4.29216e+09	4.39276e+09	0	0	-0.000930938	-0.000931372
dai	stablecoin	2026	4	2026-04-30	1.00006	0.999834	0.999422	1.00006	0.999849	0.999883	0.000634792	30	0	0.000230053	0.00126005	0.00439516	0.000799601	0.000634756	0.0837296	3.61732e+06	2.37373e+07	6.841e+07	4.33453e+09	4.40908e+09	4.46939e+09	0	0	0.000531061	0.00053092
dash	crypto	2016	1	2016-01-31	3.41586	4.0673	3.03481	5.10624	3.86488	3.81899	2.07144	31	0	0.0920294	0.504066	1.75822	0.270524	0.226279	0.226279	28176	204674	959426	1.86296e+07	2.37671e+07	3.14548e+07	0	0
dash	crypto	2016	2	2016-02-29	4.11253	3.9303	3.29514	4.28454	3.90862	3.95072	0.989405	29	0	0.0537035	0.289202	1.026	0.203367	0.230924	0.354685	36714	105011	210021	2.04841e+07	2.4326e+07	2.65726e+07	0	0	-0.0336827	-0.034263	-0.118474	-0.168479
dash	crypto	2016	3	2016-03-31	3.88965	6.87657	3.84455	7.40794	5.70984	5.87265	3.56339	31	0	0.0572939	0.318999	1.0946	0.136584	0.120206	0.247088	83297.7	301764	754237	2.40688e+07	3.59855e+07	4.68234e+07	0	0	0.74963	0.559404	1.75362	4.09567
dash	crypto	2016	4	2016-04-30	7.06539	6.87956	6.06063	7.06539	6.56974	6.50756	1.00476	30	0	0.0265254	0.145285	0.506766	0.102703	0.142209	0.181874	75368.2	178141	724613	3.86536e+07	4.18928e+07	4.4775e+07	0	0	0.000434162	0.000434068	0.00298769	0.00422645
dash	crypto	2016	5	2016-05-31	6.84888	8.18088	6.62938	8.31517	7.32356	7.3023	1.68578	31	0	0.0234287	0.130445	0.447604	0.0742987	0.110075	0.110075	50764.9	138827	416110	4.26517e+07	4.72597e+07	5.37465e+07	0	0	0.189158	0.173246	1.32811	2.33175
dash	crypto	2016	6	2016-06-30	8.24905	7.13385	6.74153	8.63644	7.72728	7.87859	1.89491	30	0	0.0298934	0.163733	0.571112	0.12161	0.219409	0.219409	93891.1	234131	554753	4.4141e+07	5.0407e+07	5.63649e+07	0	0	-0.127985	-0.136949	-0.836416	-1.12613
dash	crypto	2016	7	2016-07-31	7.245	9.50233	6.95883	9.50233	8.22483	8.19142	2.54351	31	0	0.0272518	0.151731	0.520644	0.0615588	0.0485949	0.194248	63299.5	166979	526245	4.56969e+07	5.42717e+07	6.29954e+07	0	0	0.332006	0.286686	1.88943	4.65711
dash	crypto	2016	8	2016-08-31	9.96904	11.805	9.27513	14.3765	11.9343	12.3465	5.10135	31	0	0.053818	0.299646	1.02819	0.170362	0.188477	0.188477	119215	894739	2.91685e+06	6.15288e+07	7.96214e+07	9.58424e+07	0	0	0.242324	0.216984	0.724134	1.27367
dash	crypto	2016	9	2016-09-30	11.4063	12.0537	10.9726	12.7445	11.6341	11.508	1.77185	30	0	0.0298953	0.163743	0.571149	0.0959494	0.108753	0.236768	86768	301120	973874	7.3767e+07	7.84396e+07	8.58685e+07	0	0	0.0210719	0.020853	0.127352	0.217333
dash	crypto	2016	10	2016-10-31	11.7083	9.23076	8.629	12.0737	10.7617	10.8795	3.44474	31	0	0.0346932	0.193163	0.662812	0.147595	0.285308	0.399784	122847	265662	731619	5.90462e+07	7.33124e+07	8.18869e+07	0	0	-0.234199	-0.266833	-1.38139	-1.80787
dash	crypto	2016	11	2016-11-30	9.07032	8.82116	8.39058	9.91747	9.14538	9.06954	1.52689	30	0	0.0244228	0.133769	0.466596	0.0862142	0.15396	0.416367	104840	242714	552564	5.79164e+07	6.29704e+07	6.81181e+07	0	0	-0.0443726	-0.0453872	-0.339296	-0.526447
dash	crypto	2016	12	2016-12-31	8.70466	11.413	8.4965	11.413	9.53782	9.58585	2.91653	31	0	0.0310774	0.173032	0.593733	0.0895414	0.0688646	0.409	54239.8	259731	633181	5.89275e+07	6.63791e+07	7.97856e+07	0	0	0.293824	0.257602	1.48876	2.8769
dash	crypto	2017	1	2017-01-31	11.4087	16.0469	11.2883	16.3272	13.78	14.0834	5.03891	31	0	0.0739279	0.411613	1.41239	0.26116	0.30862	0.30862	418394	987434	2.96735e+06	7.92577e+07	9.69109e+07	1.14394e+08	0	0	0.406012	0.340758	0.827859	1.30478
dash	crypto	2017	2	2017-02-28	15.9149	32.6813	15.9149	32.6813	20.5806	18.9488	16.7664	28	0	0.0464034	0.245544	0.886536	0.082604	0.0683489	0.0683489	703223	2.12777e+06	7.67861e+06	1.12452e+08	1.46218e+08	2.33027e+08	0	0	1.03661	0.711289	2.89679	8.61083
dash	crypto	2017	3	2017-03-31	43.2794	73.2392	42.3731	107.658	75.7258	82.5169	65.2844	31	0	0.112095	0.62412	2.14158	0.244309	0.319702	0.319702	4.64915e+06	2.53481e+07	5.97876e+07	3.02847e+08	5.43127e+08	7.72209e+08	0	0	1.24101	0.806929	1.29291	3.3029
dash	crypto	2017	4	2017-04-30	73.5402	94.3254	56.3824	98.0332	72.346	72.085	41.6507	30	0	0.0835815	0.457795	1.59682	0.303525	0.233311	0.47628	3.7004e+06	1.10428e+07	3.2742e+07	4.06087e+08	5.23415e+08	7.11798e+08	0	0	0.287908	0.253019	0.55269	0.833601
dash	crypto	2017	5	2017-05-31	88.4368	138.278	82.4862	143.625	102.218	98.5707	61.1392	31	0	0.0731508	0.407286	1.39754	0.257574	0.295581	0.295581	3.90204e+06	1.62222e+07	4.77424e+07	6.02342e+08	7.46359e+08	1.05078e+09	0	0	0.46597	0.382517	0.939184	1.48507
dash	crypto	2017	6	2017-06-30	137.108	176.385	137.108	197.935	166.199	167.305	60.827	30	0	0.0673795	0.369053	1.28728	0.224433	0.183134	0.183134	7.65269e+06	2.21866e+07	1.01271e+08	1.00527e+09	1.22434e+09	1.45932e+09	0	0	0.275578	0.243399	0.659524	1.08451
dash	crypto	2017	7	2017-07-31	163.842	177.257	131.077	210.584	179.427	182.607	79.5073	31	0	0.0794016	0.44209	1.51697	0.29037	0.377556	0.377556	1.15953e+07	2.72315e+07	7.29886e+07	9.73961e+08	1.33313e+09	1.56058e+09	0	0	0.00494373	0.00493155	0.0111551	0.0169837
dash	crypto	2017	8	2017-08-31	183.679	383.129	181.681	395.688	256.29	222.816	214.007	31	0	0.0730818	0.406902	1.39623	0.125535	0.0998181	0.137251	1.57727e+07	4.81973e+07	2.28305e+08	1.35607e+09	1.92227e+09	2.97396e+09	0	0	1.16144	0.770774	1.89425	6.13989
dash	crypto	2017	9	2017-09-30	398.552	326.872	241.087	398.552	331.518	331.397	157.465	30	0	0.0705499	0.386418	1.34785	0.302922	0.395093	0.395093	1.79702e+07	4.33132e+07	1.39172e+08	1.8221e+09	2.50638e+09	3.00021e+09	0	0	-0.146836	-0.158804	-0.410963	-0.524239
dash	crypto	2017	10	2017-10-31	315.929	277.301	274.844	315.929	293.921	294.303	41.0852	31	0	0.0276209	0.153787	0.527697	0.119034	0.130046	0.310394	1.77134e+07	3.08802e+07	6.03443e+07	2.09911e+09	2.24108e+09	2.40561e+09	0	0	-0.151654	-0.164466	-1.06944	-1.38167
dash	crypto	2017	11	2017-11-30	270.783	758.077	260.993	758.077	444.638	423.562	497.084	30	0	0.0844199	0.462387	1.61284	0.158971	0.145931	0.345147	2.63468e+07	1.20483e+08	3.73884e+08	1.99899e+09	3.42229e+09	5.85266e+09	0	0	1.73377	1.00568	2.17498	6.3262
dash	crypto	2017	12	2017-12-31	783.124	1020.1	683.117	1447.47	972.791	963.265	764.352	31	0	0.0796033	0.443212	1.52082	0.239573	0.319863	0.319863	8.68826e+07	1.86607e+08	5.4422e+08	5.2871e+09	7.5489e+09	1.124e+10	0	0	0.34564	0.296869	0.669813	1.23916
dash	crypto	2018	1	2018-01-31	1022.89	685.697	668.405	1158.44	922.124	924.123	490.031	31	0	0.0731099	0.407059	1.39676	0.349517	0.423011	0.538225	4.49094e+07	1.00642e+08	1.93696e+08	5.24693e+09	7.21048e+09	9.02979e+09	0	0	-0.327813	-0.397219	-0.975826	-1.13648
dash	crypto	2018	2	2018-02-28	610.146	582.029	442.828	740.76	619.427	621.358	297.932	28	0	0.0859813	0.45497	1.64267	0.331328	0.29823	0.694068	3.02158e+07	4.81488e+07	8.21858e+07	3.48369e+09	4.88482e+09	5.84499e+09	0	0	-0.151187	-0.163916	-0.360278	-0.494724
dash	crypto	2018	3	2018-03-31	616.178	304.339	304.339	616.314	456.129	428.009	311.975	31	0	0.0528003	0.293979	1.00875	0.279326	0.506195	0.789744	3.05869e+07	3.85033e+07	5.16248e+07	2.42819e+09	3.6244e+09	4.88536e+09	0	0	-0.477107	-0.648378	-2.20552	-2.32123
dash	crypto	2018	4	2018-04-30	290.187	472.102	284.697	527.015	389.379	364.007	242.318	30	0	0.0671167	0.367613	1.28226	0.225615	0.160644	0.803314	2.45394e+07	3.38887e+07	6.28934e+07	2.27635e+09	3.12117e+09	4.23117e+09	0	0	0.55124	0.439054	1.19434	1.94603
dash	crypto	2018	5	2018-05-31	478.187	304.575	285.614	507.223	398.941	401.352	221.609	31	0	0.0443982	0.247199	0.848227	0.214234	0.436906	0.80268	2.06559e+07	3.13252e+07	4.22564e+07	2.31252e+09	3.22015e+09	4.08548e+09	0	0	-0.354853	-0.438278	-1.77298	-2.04579
dash	crypto	2018	6	2018-06-30	314.705	238.01	219.387	330.138	270.012	264.516	110.751	30	0	0.0430227	0.235645	0.821948	0.190617	0.33547	0.848434	1.01209e+07	1.71179e+07	2.69119e+07	1.79005e+09	2.19633e+09	2.67861e+09	0	0	-0.218552	-0.246606	-1.04652	-1.29373
dash	crypto	2018	7	2018-07-31	236.22	216.966	209.37	266.205	239.856	241.831	56.8349	31	0	0.0379866	0.211501	0.725734	0.153492	0.184965	0.855355	1.1494e+07	1.98359e+07	5.50764e+07	1.71498e+09	1.96639e+09	2.18346e+09	0	0	-0.088415	-0.0925705	-0.437684	-0.603097
dash	crypto	2018	8	2018-08-31	218.857	193.89	136.473	218.857	170.567	167.615	82.3844	31	0	0.0754754	0.420229	1.44196	0.263001	0.37643	0.905716	1.05351e+07	1.83201e+07	3.95934e+07	1.12897e+09	1.4089e+09	1.80073e+09	0	0	-0.10636	-0.112453	-0.267599	-0.427576
dash	crypto	2018	9	2018-09-30	220.728	186.863	174.958	220.728	194.451	191.392	45.7708	30	0	0.0577732	0.316437	1.10376	0.250824	0.207363	0.879129	1.13748e+07	2.21916e+07	3.82461e+07	1.4529e+09	1.61841e+09	1.83001e+09	0	0	-0.0362416	-0.0369147	-0.116657	-0.147174
dash	crypto	2018	10	2018-10-31	186.696	151.716	148.744	186.696	162.618	156.181	37.9523	31	0	0.0280213	0.156016	0.535347	0.146839	0.203284	0.897239	7.99933e+06	1.45232e+07	2.2166e+07	1.2508e+09	1.36338e+09	1.55926e+09	0	0	-0.188087	-0.208362	-1.33551	-1.41898
dash	crypto	2018	11	2018-11-30	152.738	90.9143	87.8969	170.373	130.746	135.567	82.4764	30	0	0.0602491	0.329998	1.15106	0.288914	0.484092	0.939275	9.22404e+06	1.80377e+08	4.85959e+08	7.44174e+08	1.104e+09	1.43621e+09	0	0	-0.400761	-0.512095	-1.55181	-1.77248
dash	crypto	2018	12	2018-12-31	93.744	77.4528	58.1508	95.1357	76.1356	76.7949	36.9848	31	0	0.0858787	0.478152	1.64071	0.32344	0.379685	0.959826	4.10016e+07	3.13521e+08	6.61771e+08	4.94601e+08	6.47867e+08	8.10224e+08	0	0	-0.148068	-0.160248	-0.33514	-0.495449
dash	crypto	2019	1	2019-01-31	79.9784	66.7746	66.5886	85.0219	73.5405	72.019	18.4333	31	0	0.0440337	0.245169	0.841263	0.20606	0.216807	0.953997	1.10949e+08	3.61157e+08	6.80646e+08	5.72382e+08	6.30326e+08	7.27715e+08	0	0	-0.137868	-0.148347	-0.605078	-0.71992	1.64955
dash	crypto	2019	2	2019-02-28	66.266	81.1735	64.5958	88.9666	76.8737	78.7132	24.3708	28	0	0.0389032	0.205856	0.743244	0.127695	0.102947	0.955373	7.04874e+07	6.14861e+08	1.17544e+09	5.56594e+08	6.63675e+08	7.69358e+08	0	0	0.215634	0.195266	0.948554	1.52916	1.86579
dash	crypto	2019	3	2019-03-31	82.2493	110.222	77.169	110.222	88.4783	89.3818	33.0528	31	0	0.03395	0.189025	0.648613	0.0759204	0.0617666	0.946687	2.09777e+07	8.38532e+08	2.00406e+09	6.69086e+08	7.69168e+08	9.61121e+08	0	0	0.357855	0.305906	1.61833	4.0293	1.6279
dash	crypto	2019	4	2019-04-30	113.071	109.766	105.632	136.745	120.677	122.151	31.1133	30	0	0.0348412	0.190833	0.66564	0.119274	0.227527	0.927023	1.14664e+08	3.10218e+08	5.07817e+08	9.27093e+08	1.05623e+09	1.19525e+09	0	0	-0.00413394	-0.00414251	-0.0217075	-0.0347309	1.62379
dash	crypto	2019	5	2019-05-31	115.233	165.755	111.655	172.844	141.795	141.734	61.1891	31	0	0.0546609	0.304339	1.0443	0.131052	0.10694	0.922862	1.64994e+08	3.66457e+08	7.24495e+08	9.82422e+08	1.24958e+09	1.52375e+09	0	0	0.510077	0.412161	1.35428	3.14501	1.8471
dash	crypto	2019	6	2019-06-30	163.431	157.023	142.027	176.475	158.854	157.068	34.4484	30	0	0.0437996	0.2399	0.83679	0.181381	0.141156	0.901879	5.65748e+07	3.94691e+08	6.4335e+08	1.25792e+09	1.40881e+09	1.56782e+09	0	0	-0.0526811	-0.0541194	-0.225591	-0.298374	1.92876
dash	crypto	2019	7	2019-07-31	154.296	108.19	99.9903	159.715	128.578	118.396	59.7246	31	0	0.0500021	0.2784	0.955289	0.25511	0.373945	0.930921	9.24798e+07	3.58681e+08	6.1506e+08	8.92468e+08	1.14731e+09	1.42337e+09	0	0	-0.310992	-0.372503	-1.33801	-1.46017	1.3372
dash	crypto	2019	8	2019-08-31	107.018	79.8981	79.7288	110.697	96.5793	94.952	30.9682	31	0	0.0319369	0.177817	0.610154	0.151166	0.279756	0.944918	2.13638e+07	2.15653e+08	4.54502e+08	7.18043e+08	8.67555e+08	9.92428e+08	0	0	-0.261503	-0.303138	-1.70478	-2.00533	0.954025
dash	crypto	2019	9	2019-09-30	79.7489	70.7851	68.881	99.3237	83.879	83.4056	30.4426	30	0	0.0463534	0.253888	0.885581	0.20914	0.306499	0.952413	4.276e+06	4.31111e+07	7.61235e+07	6.24013e+08	7.58347e+08	8.98616e+08	0	0	-0.114057	-0.121103	-0.476994	-0.579052	0.860479
dash	crypto	2019	10	2019-10-31	70.0235	71.7339	62.6123	74.2508	69.8356	70.0235	11.6385	31	0	0.0298713	0.166316	0.57069	0.102481	0.156746	0.956744	3.01336e+06	8.24783e+06	2.25049e+07	5.70448e+08	6.35439e+08	6.74721e+08	0	0	0.0134045	0.0133155	0.0800612	0.129931	1.04944
dash	crypto	2019	11	2019-11-30	71.9618	55.1459	50.0449	74.532	64.3618	67.8932	24.4871	30	0	0.0321308	0.175988	0.613858	0.151127	0.328545	0.965426	3.92256e+06	1.02017e+07	2.34792e+07	4.59045e+08	5.89228e+08	6.8112e+08	0	0	-0.231244	-0.262982	-1.49432	-1.74014	0.890296
dash	crypto	2019	12	2019-12-31	53.3161	40.9832	39.4898	53.3161	46.5747	45.9109	13.8262	31	0	0.0407875	0.227095	0.779244	0.185628	0.259325	0.972718	2.7067e+06	9.07166e+06	2.01176e+07	3.64594e+08	4.29084e+08	4.89886e+08	0	0	-0.256822	-0.29682	-1.30703	-1.599	0.553568
dash	crypto	2020	1	2020-01-31	41.651	115.617	39.9168	134.024	86.8782	101.431	94.1075	31	0	0.103417	0.575802	1.97578	0.206191	0.251017	0.972423	4.92279e+06	1.13461e+08	5.66706e+08	3.69138e+08	8.05939e+08	1.24238e+09	1	0	1.82108	1.03712	1.80118	5.02991	0.970409
dash	crypto	2020	2	2020-02-29	116.56	85.9209	84.8477	133.792	112.747	114.667	48.944	29	0	0.050469	0.271784	0.964208	0.228997	0.365822	0.941382	3.88966e+07	7.71634e+07	1.67706e+08	7.9307e+08	1.0516e+09	1.24736e+09	0	0	-0.256849	-0.296856	-1.09225	-1.29633	0.396085
dash	crypto	2020	3	2020-03-31	84.9843	65.4601	42.8759	93.7692	68.776	69.0468	50.8932	31	0	0.121901	0.678714	2.32891	0.556972	0.54275	0.970379	2.23881e+07	5.74172e+07	1.5686e+08	4.02365e+08	6.45343e+08	8.78371e+08	0	0	-0.238136	-0.271987	-0.400738	-0.488331	-0.0382762
dash	crypto	2020	4	2020-04-30	66.2647	81.0741	66.2647	85.7371	76.3252	75.485	19.4725	30	0	0.046456	0.25445	0.887541	0.161798	0.150117	0.95422	2.95447e+07	6.42822e+07	1.16946e+08	6.24028e+08	7.20733e+08	8.10902e+08	0	0	0.238528	0.213923	0.840728	1.32216	-0.0512699
dash	crypto	2020	5	2020-05-31	83.0136	76.2657	69.7545	83.318	76.1549	75.0599	13.5635	31	0	0.0325601	0.181287	0.622059	0.144299	0.162792	0.951809	1.42019e+07	2.40749e+07	4.65463e+07	6.61852e+08	7.23182e+08	7.89362e+08	0	0	-0.0593083	-0.0611398	-0.337255	-0.423704	-0.187446
dash	crypto	2020	6	2020-06-30	80.0574	68.2482	66.8055	80.0574	73.5254	72.4406	13.2519	30	0	0.0246996	0.135285	0.471885	0.113489	0.16553	0.953847	8.69409e+06	1.59075e+07	4.20466e+07	6.39185e+08	7.02119e+08	7.62687e+08	0	0	-0.105127	-0.111073	-0.821032	-0.978713	-0.282665
dash	crypto	2020	7	2020-07-31	68.3574	82.4411	66.4748	82.4411	72.3458	71.7449	15.9663	31	0	0.0191285	0.106503	0.365449	0.0493504	0.0515866	0.954075	7.72729e+06	2.10642e+07	4.82164e+07	6.36985e+08	6.94801e+08	7.93993e+08	0	0	0.207961	0.188934	1.77398	3.82841	-0.234643
dash	crypto	2020	8	2020-08-31	93.461	86.5381	83.3131	100.586	90.8417	91.3247	17.2733	31	0	0.0479851	0.26717	0.916755	0.181091	0.171726	0.942442	2.10115e+07	4.38613e+07	1.1186e+08	8.05944e+08	8.77203e+08	9.69704e+08	0	0	0.0496963	0.0485009	0.181536	0.267826	-0.407361
dash	crypto	2020	9	2020-09-30	89.6862	69.0227	64.7092	89.6862	72.5021	72.2721	24.977	30	0	0.0524409	0.287231	1.00188	0.252003	0.278493	0.955295	1.29063e+07	2.65007e+07	5.75753e+07	6.29046e+08	7.03931e+08	8.68734e+08	0	0	-0.202401	-0.22615	-0.787345	-0.897408	-0.421446
dash	crypto	2020	10	2020-10-31	67.9462	70.1653	65.1896	75.0864	69.2947	69.2886	9.89676	31	0	0.0327418	0.182298	0.62553	0.106768	0.108224	0.954963	7.20007e+06	2.54538e+07	6.6072e+07	6.35378e+08	6.76536e+08	7.33613e+08	0	0	0.0165536	0.0164181	0.0900615	0.153774	-0.382888
dash	crypto	2020	11	2020-11-30	68.5969	113.282	64.3646	114.708	82.3687	79.1015	50.343	30	0	0.0699866	0.383333	1.33709	0.186387	0.200876	0.955533	2.08937e+07	6.35216e+07	2.76384e+08	6.30515e+08	8.08758e+08	1.12748e+09	0	0	0.614496	0.479023	1.24963	2.57005	-0.488987
dash	crypto	2020	12	2020-12-31	104.19	99.7659	92.0561	109.511	101.848	102.763	17.4548	31	0	0.0445733	0.248174	0.851572	0.203497	0.159389	0.936402	1.90352e+07	5.66926e+07	1.13055e+08	9.0954e+08	1.00524e+09	1.08148e+09	0	0	-0.11931	-0.12705	-0.511939	-0.624333	-0.561842
dash	crypto	2021	1	2021-01-31	88.7775	102.544	86.956	146.503	109.539	105.271	59.5474	31	0	0.0832307	0.463409	1.59012	0.302325	0.338426	0.939926	5.11854e+07	1.44843e+08	7.70311e+08	8.60959e+08	1.08709e+09	1.45239e+09	0	0	0.0278457	0.0274651	0.0592675	0.0908462	-0.499033
dash	crypto	2021	2	2021-02-28	103.477	198.23	103.477	326.356	199.581	208.175	222.878	28	0	0.114298	0.604809	2.18366	0.287016	0.392596	0.928512	6.86561e+07	3.75597e+08	1.46078e+09	1.02997e+09	1.99152e+09	3.25769e+09	1	0	0.93312	0.659135	1.08982	2.29651	-0.324497
dash	crypto	2021	3	2021-03-31	220.08	223.125	189.062	243.529	218.458	220.08	54.4676	31	0	0.0461972	0.257215	0.882595	0.151554	0.22366	0.869385	7.21768e+07	1.30797e+08	2.24766e+08	1.89836e+09	2.19047e+09	2.43912e+09	0	0	0.125589	0.118306	0.459951	0.780619	-0.107641
dash	crypto	2021	4	2021-04-30	234.011	319.217	224.782	383.709	285.251	282.136	158.927	30	0	0.0760608	0.416602	1.45314	0.237354	0.359704	0.844707	1.39833e+08	3.28683e+08	8.17461e+08	2.26143e+09	2.87572e+09	3.86819e+09	0	0	0.430665	0.35814	0.859668	1.50888	-0.133917
dash	crypto	2021	5	2021-05-31	323.263	197.911	150.893	444.658	292.176	314.871	293.765	31	0	0.127318	0.708877	2.43241	0.578113	0.660654	0.895754	1.20084e+08	3.59566e+08	8.36273e+08	1.53064e+09	2.95973e+09	4.49902e+09	0	0	-0.380012	-0.478056	-0.674385	-0.826924	-0.154664
dash	crypto	2021	6	2021-06-30	191.549	145.584	118.186	224.759	161.279	164.126	106.573	30	0	0.0846477	0.463635	1.61719	0.378543	0.474166	0.91835	6.04627e+07	8.88315e+07	1.47222e+08	1.20465e+09	1.6421e+09	2.28565e+09	0	0	-0.264398	-0.307066	-0.662301	-0.811177	-0.182571
dash	crypto	2021	7	2021-07-31	138.671	165.019	115.183	165.019	135.739	135.296	49.836	31	0	0.0519472	0.289229	0.992449	0.163868	0.179634	0.920425	3.26104e+07	8.55683e+07	4.29224e+08	1.17866e+09	1.3892e+09	1.69305e+09	0	0	0.133499	0.125309	0.433251	0.764693	-0.107495
dash	crypto	2021	8	2021-08-31	161.021	223.754	157.213	270.752	204.757	201.718	113.539	31	0	0.0490113	0.272883	0.936359	0.171676	0.194589	0.891388	4.79682e+07	1.11102e+08	2.96125e+08	1.61365e+09	2.10609e+09	2.78698e+09	0	0	0.355933	0.30449	1.11582	1.77363	0.062022
dash	crypto	2021	9	2021-09-30	238.083	165.003	147.906	263.377	196.655	197.671	115.471	30	0	0.0645348	0.353472	1.23294	0.299363	0.438425	0.897818	5.78269e+07	1.03751e+08	2.80015e+08	1.53168e+09	2.03174e+09	2.71738e+09	0	0	-0.262572	-0.304587	-0.861701	-1.01745	-0.0520348
dash	crypto	2021	10	2021-10-31	176.139	192.278	174.491	206.834	188.108	186.759	32.3422	31	0	0.0362801	0.201999	0.69313	0.147315	0.150055	0.879451	5.89526e+07	9.17792e+07	2.02995e+08	1.80854e+09	1.95317e+09	2.15012e+09	0	0	0.165303	0.152981	0.757335	1.03846	0.109172
dash	crypto	2021	11	2021-11-30	189.771	180.212	174.928	235.504	200.953	197.975	60.5756	30	0	0.0622623	0.341025	1.18952	0.251752	0.257217	0.879149	4.24941e+07	1.27225e+08	3.31304e+08	1.82544e+09	2.09632e+09	2.45446e+09	0	0	-0.0627546	-0.0648102	-0.190045	-0.257436	0.34032
dash	crypto	2021	12	2021-12-31	178.639	134.29	127.063	178.639	140.814	135.675	51.5762	31	0	0.0497665	0.277088	0.950787	0.2441	0.288717	0.912217	3.31243e+07	7.02024e+07	2.00689e+08	1.33253e+09	1.47595e+09	1.86844e+09	0	0	-0.254824	-0.294134	-1.06152	-1.20498	0.267482
dash	crypto	2022	1	2022-01-31	137.541	94.2109	89.7842	152.617	122.158	130.847	62.8332	31	0	0.0483687	0.269306	0.924083	0.233737	0.411704	0.937972	3.2012e+07	7.44761e+07	2.0283e+08	9.46709e+08	1.28631e+09	1.60566e+09	0	0	-0.29845	-0.354463	-1.31621	-1.5165	0.161514
dash	crypto	2022	2	2022-02-28	97.3368	100.204	87.5367	115.988	101.357	102.491	28.4509	28	0	0.0566783	0.299914	1.08284	0.203766	0.245293	0.939524	2.55797e+07	4.2505e+07	7.87553e+07	9.26898e+08	1.07227e+09	1.22578e+09	0	0	0.0636123	0.0616709	0.205629	0.302656	0.0966183
dash	crypto	2022	3	2022-03-31	99.7592	126.96	85.8352	133.149	108.418	99.7739	47.3139	31	0	0.0484062	0.269514	0.924798	0.166969	0.150935	0.9407	2.34684e+07	8.47638e+07	2.07599e+08	9.10943e+08	1.15246e+09	1.4184e+09	0	0	0.267016	0.236664	0.878114	1.41741	0.0641032
dash	crypto	2022	4	2022-04-30	128.014	84.6137	84.6137	133.474	108.365	107.002	48.8605	30	0	0.0413487	0.226476	0.789965	0.217717	0.366067	0.941544	2.35721e+07	5.32716e+07	1.03493e+08	9.05605e+08	1.15692e+09	1.42285e+09	0	0	-0.33354	-0.405775	-1.79169	-1.86377	-0.110389
dash	crypto	2022	5	2022-05-31	89.97	64.6606	53.9079	95.6604	67.4298	61.4576	41.7525	31	0	0.0718488	0.400037	1.37267	0.340405	0.436466	0.962757	1.02999e+07	4.1021e+07	1.8901e+08	5.77914e+08	7.23175e+08	1.0244e+09	0	0	-0.235815	-0.268945	-0.672299	-0.790072	-0.337737
dash	crypto	2022	6	2022-06-30	59.75	41.5909	41.557	59.9568	50.0682	48.8396	18.3999	30	0	0.0515167	0.282168	0.984224	0.248109	0.306885	0.97129	5.4497e+06	1.68168e+07	4.96935e+07	4.47777e+08	5.39426e+08	6.44887e+08	0	0	-0.356781	-0.441269	-1.56385	-1.77853	-0.411388
dash	crypto	2022	7	2022-07-31	41.9564	51.1072	40.0478	52.3705	46.094	46.0653	12.3227	31	0	0.0425821	0.237087	0.81353	0.154144	0.162947	0.972333	6.10988e+06	1.31923e+07	2.36247e+07	4.33116e+08	4.98821e+08	5.67752e+08	0	0	0.228807	0.206044	0.869064	1.3367	-0.254326
dash	crypto	2022	8	2022-08-31	49.5775	44.4653	44.1582	56.9954	50.1056	49.3895	12.8372	31	0	0.0407902	0.22711	0.779296	0.191103	0.225232	0.969493	7.1251e+06	1.30307e+07	2.76347e+07	4.80466e+08	5.445e+08	6.19134e+08	0	0	-0.12996	-0.139217	-0.612992	-0.728489	-0.204035
dash	crypto	2022	9	2022-09-30	44.7275	41.9293	39.7924	48.8716	43.9382	43.734	9.0792	30	0	0.0377907	0.206988	0.72199	0.169526	0.185777	0.972509	6.97555e+06	1.95989e+07	4.73083e+07	4.34556e+08	4.79509e+08	5.32907e+08	0	0	-0.0570346	-0.0587256	-0.283715	-0.346411	-0.184164
dash	crypto	2022	10	2022-10-31	41.7676	41.8887	39.6609	42.86	41.418	41.729	3.19907	31	0	0.0216242	0.120399	0.413131	0.0873459	0.0746399	0.9726	4.86292e+06	1.01628e+07	1.72676e+07	4.34867e+08	4.53944e+08	4.7013e+08	0	0	-0.000968644	-0.000969113	-0.0080492	-0.0110951	-0.188751
dash	crypto	2022	11	2022-11-30	41.1477	43.1934	31.8902	45.7342	38.5999	39.1225	13.844	30	0	0.0694622	0.38046	1.32707	0.273882	0.302705	0.977968	5.94149e+06	1.94073e+07	5.71101e+07	3.50678e+08	4.24832e+08	5.02788e+08	0	0	0.0311488	0.0306735	0.0806222	0.111995	-0.0899196
dash	crypto	2022	12	2022-12-31	45.4392	42.0286	41.3325	48.9098	44.6212	44.3967	7.57732	31	0	0.0277168	0.154321	0.529529	0.115442	0.154924	0.971445	7.67197e+06	1.62188e+07	3.07385e+07	4.56951e+08	4.93144e+08	5.40389e+08	0	0	-0.0269678	-0.0273381	-0.177151	-0.236812	0.0096944
dash	crypto	2023	1	2023-01-31	42.1982	59.9993	42.1982	59.9993	49.6939	49.33	17.801	31	0	0.035765	0.199131	0.68329	0.102885	0.0910232	0.970847	8.97155e+06	2.10999e+07	5.95128e+07	4.67432e+08	5.51576e+08	6.67342e+08	0	0	0.427581	0.355982	1.78767	3.45999	-0.22582
dash	crypto	2023	2	2023-02-28	62.9105	71.6605	57.1773	74.1659	67.0799	68.8079	16.9886	28	0	0.0427831	0.226387	0.81737	0.138764	0.130374	0.960498	1.38637e+07	2.78848e+07	4.74876e+07	6.36655e+08	7.47511e+08	8.27843e+08	0	0	0.194357	0.177608	0.784534	1.27992	-0.0674963
dash	crypto	2023	3	2023-03-31	74.0086	58.4769	46.6402	74.0086	58.9836	58.2577	27.3684	31	0	0.0566779	0.315569	1.08283	0.228831	0.3698	0.967778	1.15789e+07	2.52812e+07	5.71455e+07	5.21426e+08	6.59836e+08	8.26392e+08	0	0	-0.183973	-0.203308	-0.644258	-0.888462	-0.0424332
dash	crypto	2023	4	2023-04-30	58.7531	49.9228	48.8856	61.0804	54.8982	56.0067	12.1948	30	0	0.0319967	0.175253	0.611295	0.153748	0.199651	0.966227	5.07925e+06	1.25505e+07	2.72493e+07	5.49484e+08	6.16659e+08	6.86138e+08	0	0	-0.146281	-0.158153	-0.902429	-1.02866	-0.1716
dash	crypto	2023	5	2023-05-31	48.3151	41.8168	40.7578	49.2907	43.7876	43.2918	8.53293	31	0	0.0315915	0.175894	0.603554	0.157354	0.173114	0.971842	3.00953e+06	6.99726e+06	1.6254e+07	4.59529e+08	4.93872e+08	5.55064e+08	0	0	-0.162372	-0.177181	-1.00732	-1.126	-0.208715
dash	crypto	2023	6	2023-06-30	41.8837	37.6698	29.0235	42.7306	34.8775	34.458	13.7071	30	0	0.0582016	0.318783	1.11194	0.279936	0.320779	0.979949	3.20892e+06	8.71413e+06	3.39992e+07	3.28583e+08	3.94948e+08	4.83213e+08	0	0	-0.0991703	-0.104439	-0.327618	-0.373082	-0.203754
dash	crypto	2023	7	2023-07-31	37.9722	31.6714	31.4018	38.1958	33.5963	33.3528	6.79404	31	0	0.0250551	0.139501	0.478677	0.112185	0.177874	0.978306	2.51377e+06	6.38598e+06	1.46171e+07	3.57318e+08	3.81912e+08	4.33515e+08	0	0	-0.159237	-0.173445	-1.24333	-1.54606	-0.303119
dash	crypto	2023	8	2023-08-31	31.6432	26.0328	25.1157	32.9434	29.0167	28.3319	7.82764	31	0	0.0290989	0.162016	0.555935	0.145612	0.237609	0.982649	2.05878e+06	5.58946e+06	1.10626e+07	2.8685e+08	3.31103e+08	3.75583e+08	0	0	-0.178033	-0.196055	-1.21009	-1.34642	-0.359251
dash	crypto	2023	9	2023-09-30	25.2534	27.7881	24.6812	27.7881	26.155	26.2316	3.10689	30	0	0.0186962	0.102403	0.357191	0.0746938	0.0702043	0.982949	1.5831e+06	2.68642e+06	4.16651e+06	2.82555e+08	2.99601e+08	3.1891e+08	0	0	0.0674243	0.0652486	0.637172	0.873547	-0.284833
dash	crypto	2023	10	2023-10-31	28.1984	29.3102	24.8067	29.4346	26.7233	26.8063	4.62787	31	0	0.0182532	0.101629	0.348727	0.0601983	0.12028	0.982862	1.46955e+06	3.55809e+06	9.4247e+06	2.85261e+08	3.07261e+08	3.39051e+08	0	0	0.0547747	0.0533272	0.524721	0.885858	-0.274881
dash	crypto	2023	11	2023-11-30	29.8888	30.1487	28.2482	33.6529	30.5648	30.4979	5.40474	30	0	0.0324049	0.177489	0.619094	0.136734	0.160602	0.980484	3.22527e+06	6.31505e+06	1.42726e+07	3.26171e+08	3.52731e+08	3.88195e+08	0	0	0.0286087	0.0282071	0.158923	0.206292	-0.388443
[truncated: 3,629 more rows]

## Sheet: STABLECOIN_ANALYSIS
asset	year	month	month_end	mean_absdev	max_absdev	pct_days_absdev_gt_50bps	std_dev	n_obs	pos_descontinuacao
busd	2019	9	2019-09-30	0.00117086	0.00371225	0	0.00174128	11	FALSE
[truncated: 749 more rows]

## Sheet: STABLECOIN_EVENTS
asset	start	end	days	min_price	max_price	max_absdev	severity	pos_descontinuacao
[truncated: 243 more rows]

[truncated: 10 more sheets: VALIDACAO_EPISODIOS, CORR_PEARSON, CORR_SPEARMAN, ROLLING_CORR_90D, MACRO_FACTORS, ML_FEATURES_SAMPLE, COVERAGE_MAP, UNIVERSE, TESTES_RESUMO, ACEITACAO]
